# Supplementary material for: Direct synthesis of pentasubstituted pyrroles and hexasubstituted pyrrolines from propargyl sulfonylamides and allenamides
Source: Royal Society of Chemistry journal article supplement (doi:10.1039/d1sc02090k), 2021-01-01

# Supporting Information

## Direct Synthesis of Pentasubstituted Pyrroles and Hexasubstituted Pyrrolines from Propargyl Sulfonylamides and Allenamides

Changqing Ye,<sup>a†</sup> Yihang Jiao,<sup>a†</sup> Mong-Feng Chiou,<sup>a</sup> Yajun Li,<sup>a</sup> and Hongli Bao<sup>\*,a,b</sup>

<sup>1</sup> Key Laboratory of Coal to Ethylene Glycol and Its Related Technology, State Key Laboratory of Structural Chemistry, Center for Excellence in Molecular Synthesis Fujian Institute of Research on the Structure of Matter 155 Yangqiao Road West, Fuzhou, Fujian 350002, P. R. China.

<sup>2</sup> University of Chinese Academy of Sciences, No.19(A) Yuquan Road, Shijingshan District, Beijing 100049, P. R. China

†These two authors contributed equally

*E-mail: hlbao@fjirsm.ac.cn*

|                                                                                   |     |
|-----------------------------------------------------------------------------------|-----|
| Materials and methods .....                                                       | S3  |
| Synthesis of propargyl sulfonylamides .....                                       | S4  |
| General procedure for synthesis of propargyl sulfonylamides <b>1a-1p, 8</b> ..... | S4  |
| General procedure for synthesis of propargyl sulfonylamides <b>1q-1s</b> .....    | S5  |
| General procedure for synthesis of propargyl sulfonylamides <b>1t-1v</b> .....    | S6  |
| Characterization data for propargyl sulfonylamides .....                          | S7  |
| Synthesis of pentasubstituted pyrroles .....                                      | S17 |
| General procedure A .....                                                         | S17 |
| Characterization data for pentasubstituted pyrroles .....                         | S18 |
| Synthesis of substituted pyrrole <b>2a</b> directly from allene <b>3a</b> .....   | S27 |
| Synthesis of tetrasubstituted allenamides .....                                   | S28 |
| Synthesis of hexasubstituted pyrrolines .....                                     | S30 |
| General procedure B .....                                                         | S30 |
| Characterization data for hexasubstituted pyrrolines .....                        | S31 |
| Synthetic applications .....                                                      | S37 |
| 1) Protection of the amine group .....                                            | S37 |
| 2) Synthesis of lactams .....                                                     | S39 |
| 3) Synthesis of atorvastatin analogues .....                                      | S41 |
| Preliminary mechanism study .....                                                 | S46 |
| a) Radical trapping reaction .....                                                | S46 |
| b) <sup>1</sup> H NMR of crude reaction solution .....                            | S47 |
| Single crystal data of <b>5a</b> .....                                            | S48 |
| Single crystal data of <b>7</b> .....                                             | S49 |
| Computational methods and details .....                                           | S50 |
| Coordinate of optimized structures .....                                          | S53 |
| References .....                                                                  | S61 |
| NMR spectra .....                                                                 | S62 |

## Materials and methods

All reactions were carried out under an atmosphere of nitrogen in a flame-dried glassware with magnetic stirring unless otherwise indicated. Commercially obtained reagents were used as received. Solvents were dried by Innovative Technology Solvent Purification System. Liquids and solutions were transferred via syringe. All reactions were monitored by thin-layer chromatography. GC-MS data were recorded on Thermo ISQ QD.  $^1\text{H}$ ,  $^{19}\text{F}$ , and  $^{13}\text{C}$  NMR spectra were recorded on Bruker-BioSpin AVANCE III HD and JEOL ECZ600S. Data for  $^1\text{H}$  NMR spectra are reported relative to TMS as an internal standard and are reported as follows: chemical shift (ppm), multiplicity, coupling constant (Hz), and integration. Data for  $^{13}\text{C}$  NMR spectra are reported relative to chloroform as an internal standard and are reported in terms of chemical shift (ppm). HRMS data were recorded on Thermo Fisher Scientific LTQ FTICR-MS, Waters Micromass GCT Premier or Thermo Finnigan DECAX-30000 LCQ Deca XP. Optical rotations were measured using a 1 mL cell with a 5 dm path length on an INESA SGW-1 polarimeter. All melting points were determined on a Beijing Science Instrument Dianguang Instrument Factory XT4B melting point apparatus without correction. IR data were recorded on Bruker Vertex 70.

## Synthesis of propargyl sulfonylamides

All alkynes, aldehyde, sulfamide and primary amine were purchased from Adamas-beta, Energy Chemical and Bidepharmatech.

General procedure for synthesis of propargyl sulfonylamides **1a-1p, 8**.

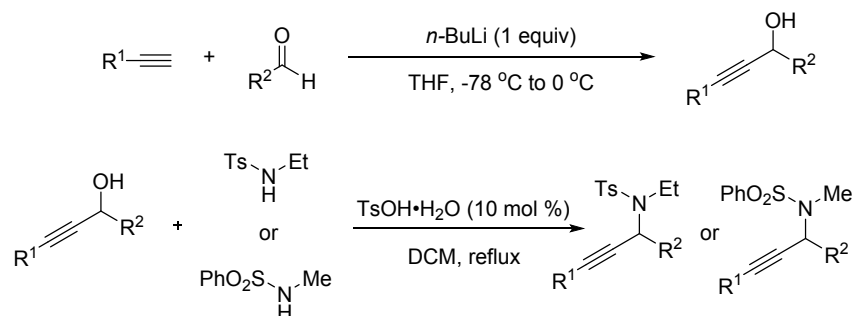

To a 50 mL round bottomed flask was charged with terminal alkyne (5 mmol, 1 equiv) and 10 mL of THF. The solution was cooled to  $-78\text{ }^\circ\text{C}$  and  $n\text{-BuLi}$  (2.5 M in THF, 2 mL, 5 mmol, 1 equiv) was added. The resulting solution was stirred for 20 minutes at room temperature and then cooled to  $-78\text{ }^\circ\text{C}$  again. Aldehyde (5 mmol, 1 equiv) in THF solution was added dropwise. The reaction mixture was then allowed to warm to room temperature and was monitored by TLC for completion. On completion the reaction was quenched with saturated aqueous  $\text{NH}_4\text{Cl}$  (40 mL). The aqueous layer was extracted with ethyl acetate and the combined organic layers were washed with brine (30 mL), dried over  $\text{MgSO}_4$  and filtered. Then the solution was concentrated under reduced pressure to afford the crude propargyl alcohol.

A solution of the resulting crude propargyl alcohol and sulfonamide (1.2 equiv) in DCM was taken in a round bottom flask under nitrogen atmosphere and then  $\text{TsOH}\cdot\text{H}_2\text{O}$  was added at room temperature. The reaction mixture was heated to reflux overnight and was monitored by TLC for completion. On completion the reaction was quenched with saturated aqueous  $\text{NaHCO}_3$ . The aqueous layer was extracted with ethyl acetate and the combined organic layers were washed with brine, dried over  $\text{MgSO}_4$  and filtered. Then the solution was concentrated under reduced pressure. The crude material was purified by flash chromatography to yield the corresponding propargyl sulfonylamide.

## General procedure for synthesis of propargyl sulfonamides **1q-1s**.

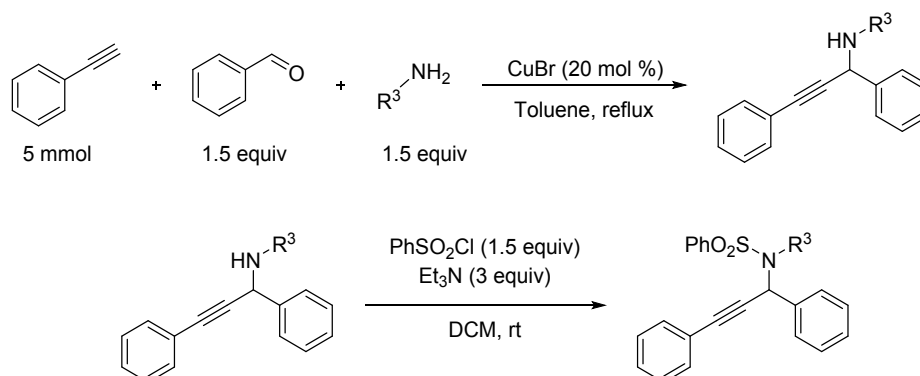

To a 50 mL round bottomed flask was charged with CuBr (1 mmol, 20 mol %), phenylacetylene (5 mmol, 1 equiv), benzaldehyde (7.5 mmol, 1.5 equiv), primary amine (7.5 mmol, 1.5 equiv) and 10 mL of toluene. The solution was heated to reflux and was monitored by TLC for completion. On completion the reaction was quenched with saturated aqueous NaHCO<sub>3</sub>. The aqueous layer was extracted with ethyl acetate and the combined organic layers were washed with brine, dried over MgSO<sub>4</sub> and filtered. Then the solution was concentrated under reduced pressure to afford the crude propargylamides.

The resulting crude propargylamine and Et<sub>3</sub>N (3 equiv) were dissolved in dry DCM, and the mixture was cooled to 0 °C with a cooling bath. To this solution benzenesulfonyl chloride (1.5 equiv) was slowly added in drops, and the mixture was allowed to warm up to room temperature and was monitored by TLC for completion. On completion the reaction was quenched with saturated aqueous NaHCO<sub>3</sub>. The aqueous layer was extracted with ethyl acetate and the combined organic layers were washed with brine, dried over MgSO<sub>4</sub> and filtered. Then the solution was concentrated under reduced pressure. The crude material was purified by flash chromatography to yield the desired product.

### General procedure for synthesis of propargyl sulfonamides **1t-1v**.

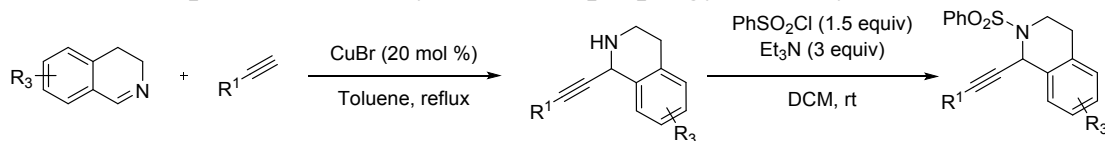

To a 50 mL round bottomed flask was charged with  $CuBr$  (1 mmol, 20 mol %), dihydroisoquinoline (5 mmol, 1 equiv), terminal alkyne (7.5 mmol, 1.5 equiv) and 10 mL of toluene. The solution was heated to reflux and was monitored by TLC for completion. On completion the reaction was quenched with saturated aqueous  $NaHCO_3$ . The aqueous layer was extracted with ethyl acetate and the combined organic layers were washed with brine, dried over  $MgSO_4$  and filtered. Then the solution was concentrated under reduced pressure to afford the crude material.

The resulting crude material and  $Et_3N$  (3 equiv) were dissolved in dry DCM, and the mixture was cooled to 0 °C with a cooling bath. To this solution benzenesulfonyl chloride (1.5 equiv) was slowly added in drops, and the mixture was allowed to warm up to room temperature and was monitored by TLC for completion. On completion the reaction was quenched with saturated aqueous  $NaHCO_3$ . The aqueous layer was extracted with ethyl acetate and the combined organic layers were washed with brine, dried over  $MgSO_4$  and filtered. Then the solution was concentrated under reduced pressure. The crude material was purified by flash chromatography to yield the desired product.

## Characterization data for propargyl sulfonylamides

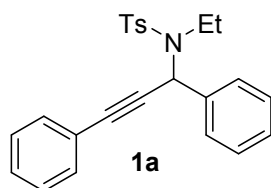

Compound **1a** was obtained as yellow solid (m.p. = 67-68 °C, Rf = 0.64 (petroleum ether/ ethyl acetate = 5:1)). <sup>1</sup>H NMR (400 MHz, CDCl<sub>3</sub>) δ 7.86 (d, *J* = 8.2 Hz, 2H), 7.70 (d, *J* = 7.5 Hz, 2H), 7.42 – 7.26 (m, 8H), 7.15 (d, *J* = 8.1 Hz, 2H), 6.27 (s, 1H), 3.36 – 3.21 (m, 1H), 3.20 – 3.05 (m, 1H), 2.36 (s, 3H), 0.84 (t, *J* = 7.2 Hz, 3H). <sup>13</sup>C NMR (100 MHz, CDCl<sub>3</sub>) δ 143.35, 137.03, 136.25, 131.55, 129.50, 128.63, 128.48, 128.35, 128.23, 128.10, 127.84, 122.12, 88.11, 83.68, 54.15, 40.72, 21.47, 16.04. HRMS (ESI) calcd for [C<sub>24</sub>H<sub>23</sub>NNaO<sub>2</sub>S] ([M+Na]<sup>+</sup>): 412.1342, found: 412.1346. IR (thin film) ν 1598.55, 2873.51, 2932.83, 2976.15 cm<sup>-1</sup>.

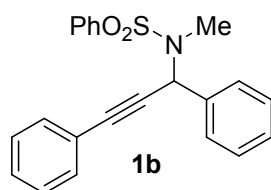

Compound **1b** was obtained as white solid (m.p. = 90-91 °C, Rf = 0.54 (petroleum ether/ ethyl acetate = 5:1)). <sup>1</sup>H NMR (400 MHz, CDCl<sub>3</sub>) δ 7.98 – 7.90 (m, 2H), 7.71 – 7.62 (m, 2H), 7.55 – 7.44 (m, 3H), 7.40 – 7.36 (m, 2H), 7.34 – 7.20 (m, 4H), 7.12 – 7.09 (m, 2H), 6.27 (s, 1H), 2.64 (s, 3H). <sup>13</sup>C NMR (100 MHz, CDCl<sub>3</sub>) δ 137.80, 136.04, 132.84, 131.64, 129.00, 128.81, 128.67, 128.52, 128.31, 128.02, 127.93, 121.84, 88.90, 82.20, 54.18, 29.97. HRMS (ESI) calcd for [C<sub>22</sub>H<sub>19</sub>NNaO<sub>2</sub>S] ([M+Na]<sup>+</sup>): 384.1029, found: 384.1031. IR (thin film) ν 1490.72, 1636.48, 2933.26 cm<sup>-1</sup>.

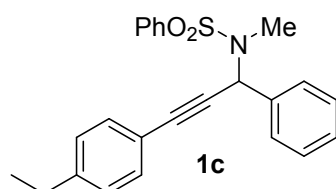

Compound **1c** was obtained as white solid (m.p. = 71-72 °C, Rf = 0.59 (petroleum ether/ ethyl acetate = 5:1)). <sup>1</sup>H NMR (400 MHz, CDCl<sub>3</sub>) δ 8.00 – 7.90 (m, 2H), 7.71 – 7.63 (m, 2H), 7.58 – 7.45 (m, 3H), 7.42 – 7.29 (m, 3H), 7.11 – 6.99 (m, 4H), 6.27 (s, 1H), 2.64 (s, 3H), 2.60 (q, *J* = 7.6 Hz, 2H), 1.20 (t, *J* = 7.6 Hz, 3H). <sup>13</sup>C NMR (100 MHz, CDCl<sub>3</sub>) δ 145.25, 137.92, 136.21, 132.77, 131.64, 128.97, 128.61, 128.44, 128.01, 127.93, 127.84, 119.04, 89.08, 81.51, 54.21, 29.92, 28.86, 15.42. HRMS (ESI) calcd

for [C<sub>24</sub>H<sub>23</sub>NNaO<sub>2</sub>S] ([M+Na]<sup>+</sup>): 412.1342, found: 412.1342. IR (thin film)  $\nu$  1447.31, 1492.92, 1511.14, 2931.97, 2965.49 cm<sup>-1</sup>.

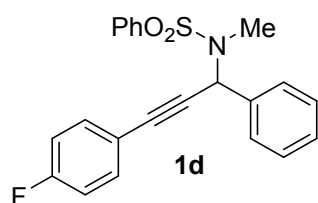

Compound **1d** was obtained as white solid (m.p. = 134-135 °C, R<sub>f</sub> = 0.57 (petroleum ether/ ethyl acetate = 5:1)). <sup>1</sup>H NMR (400 MHz, CDCl<sub>3</sub>)  $\delta$  7.99 – 7.92 (m, 2H), 7.68 – 7.62 (m, 2H), 7.60 – 7.47 (m, 3H), 7.44 – 7.31 (m, 3H), 7.13 – 7.05 (m, 2H), 6.95 (t, *J* = 8.6 Hz, 2H), 6.26 (s, 1H), 2.64 (s, 3H). <sup>13</sup>C NMR (100 MHz, CDCl<sub>3</sub>)  $\delta$  162.66 (d, *J* = 250.2 Hz), 137.88, 135.85, 133.52 (d, *J* = 8.4 Hz), 132.71, 128.90, 128.62, 128.49, 128.00, 127.84, 117.93 (d, *J* = 3.6 Hz), 115.55 (d, *J* = 22.1 Hz), 87.67, 82.02, 82.00, 54.06, 29.91. HRMS (ESI) calcd for [C<sub>22</sub>H<sub>18</sub>FNNaO<sub>2</sub>S] ([M+Na]<sup>+</sup>): 402.0934, found: 402.0934. IR (thin film)  $\nu$  1507.19, 1600.47, 2931.24 cm<sup>-1</sup>.

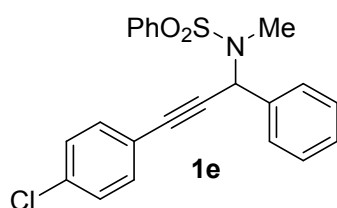

Compound **1e** was obtained as white solid (m.p. = 116-117 °C, R<sub>f</sub> = 0.59 (petroleum ether/ ethyl acetate = 5:1)). <sup>1</sup>H NMR (400 MHz, CDCl<sub>3</sub>)  $\delta$  7.99 – 7.89 (m, 2H), 7.63 (d, *J* = 7.6 Hz, 2H), 7.58 – 7.46 (m, 3H), 7.45 – 7.30 (m, 3H), 7.27 – 7.18 (m, 2H), 7.07 – 6.97 (m, 2H), 6.26 (s, 1H), 2.64 (s, 3H). <sup>13</sup>C NMR (100 MHz, CDCl<sub>3</sub>)  $\delta$  137.83, 135.72, 134.78, 132.82, 132.76, 128.93, 128.65, 128.59, 128.53, 128.00, 127.83, 120.30, 87.60, 83.31, 54.08, 29.94. HRMS (ESI) calcd for [C<sub>24</sub>H<sub>23</sub>ClNNaO<sub>2</sub>S] ([M+Na]<sup>+</sup>): 418.0639, found: 418.0640. IR (thin film)  $\nu$  1447.40, 1489.84, 2930.86 cm<sup>-1</sup>.

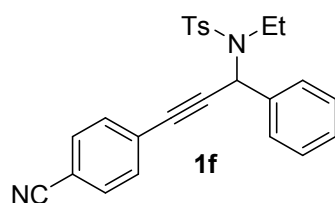

Compound **1f** was obtained as yellow liquid (R<sub>f</sub> = 0.43 (petroleum ether/ ethyl acetate = 5:1)). <sup>1</sup>H NMR (600 MHz, CDCl<sub>3</sub>)  $\delta$  7.83 (d, *J* = 8.1 Hz, 2H), 7.66 – 7.61 (m, 2H), 7.56 (d, *J* = 8.1 Hz, 2H), 7.41 – 7.34 (m, 3H), 7.27 (d, *J* = 8.1 Hz, 2H), 7.21 (d, *J* = 8.2



Hz, 2H), 6.27 (s, 1H), 3.27 (dq,  $J = 14.4, 7.1$  Hz, 1H), 3.08 (dq,  $J = 14.4, 7.1$  Hz, 1H), 2.35 (s, 3H), 0.83 (t,  $J = 7.1$  Hz, 3H).  $^{13}\text{C}$  NMR (150 MHz,  $\text{CDCl}_3$ )  $\delta$  143.52, 136.32, 136.26, 132.15, 132.01, 129.59, 128.71, 128.04, 127.93, 126.96, 118.29, 112.15, 88.62, 86.34, 54.08, 40.88, 21.58, 16.09. HRMS (ESI) calcd for  $[\text{C}_{25}\text{H}_{22}\text{N}_2\text{NaO}_2\text{S}]$  ( $[\text{M}+\text{Na}]^+$ ): 437.1294, found: 437.1294. IR (thin film)  $\nu$  1602.44, 1640.70, 2228.90, 2978.34  $\text{cm}^{-1}$ .

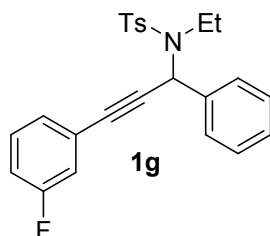

Compound **1g** was obtained as white solid (m.p. = 80-81 °C, Rf = 0.61 (petroleum ether/ ethyl acetate = 5:1)).  $^1\text{H}$  NMR (600 MHz,  $\text{CDCl}_3$ )  $\delta$  7.90 – 7.81 (m, 2H), 7.67 (d,  $J = 5.4$  Hz, 2H), 7.41 – 7.37 (m, 2H), 7.36 – 7.33 (m, 1H), 7.30 (d,  $J = 7.9$  Hz, 2H), 7.26 – 7.22 (m, 1H), 7.04 – 7.00 (m, 1H), 6.97 – 6.95 (m, 1H), 6.75 – 6.72 (m, 1H), 6.25 (s, 1H), 3.28 (dq,  $J = 13.8, 6.9$  Hz, 1H), 3.09 (dq,  $J = 14.4, 7.2$  Hz, 1H), 2.38 (s, 3H), 0.84 (t,  $J = 7.2$  Hz, 3H).  $^{13}\text{C}$  NMR (150 MHz,  $\text{CDCl}_3$ )  $\delta$  162.25 (d,  $J = 246.1$  Hz), 143.60, 136.71, 136.23, 129.97 (d,  $J = 8.6$  Hz), 129.63, 128.62, 128.54, 128.12, 127.94, 127.47, 127.46, 123.92 (d,  $J = 9.7$  Hz), 118.50 (d,  $J = 23.0$  Hz), 116.10 (d,  $J = 20.7$  Hz), 86.90, 84.78, 54.15, 40.86, 21.48, 16.15. HRMS (ESI) calcd for  $[\text{C}_{24}\text{H}_{22}\text{FNNaO}_2\text{S}]$  ( $[\text{M}+\text{Na}]^+$ ): 430.1247, found: 430.1249. IR (thin film)  $\nu$  1581.02, 1644.09, 2935.68  $\text{cm}^{-1}$ .

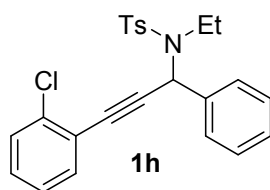

Compound **1h** was obtained as white solid (m.p. = 122-123 °C, Rf = 0.57 (petroleum ether/ ethyl acetate = 5:1)).  $^1\text{H}$  NMR (600 MHz,  $\text{CDCl}_3$ )  $\delta$  7.89 – 7.81 (m, 2H), 7.76 (d,  $J = 7.7$  Hz), 7.44 – 7.31 (m, 4H), 7.28 – 7.22 (m, 3H), 7.19 – 7.15 (m, 1H), 7.13 – 7.10 (m, 1H), 6.32 (s, 1H), 3.30 (dq,  $J = 14.4, 7.2$  Hz, 1H), 3.18 (dq,  $J = 14.3, 7.0$  Hz, 1H), 2.31 (s, 3H), 0.84 (t,  $J = 7.2$  Hz, 3H).  $^{13}\text{C}$  NMR (150 MHz,  $\text{CDCl}_3$ )  $\delta$  143.49, 136.98, 136.29, 136.02, 133.39, 129.81, 129.61, 129.33, 128.60, 128.47, 128.22, 127.85, 126.45, 122.18, 89.04, 85.02, 54.32, 40.95, 21.52, 16.17. HRMS (ESI) calcd for  $[\text{C}_{24}\text{H}_{23}\text{ClNNaO}_2\text{S}]$  ( $[\text{M}+\text{Na}]^+$ ): 446.0952, found: 446.0952. IR (thin film)  $\nu$  1599.48, 1644.58, 2934.90, 2977.97,  $\text{cm}^{-1}$ .

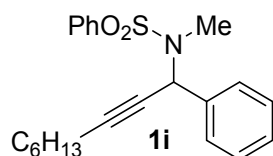

Compound **1i** was obtained as colorless liquid (m.p. = 67-68 °C, Rf = 0.68 (petroleum ether/ ethyl acetate = 5:1)). <sup>1</sup>H NMR (400 MHz, CDCl<sub>3</sub>) δ 7.97 – 7.88 (m, 2H), 7.61 – 7.50 (m, 5H), 7.40 – 7.28 (m, 3H), 6.03 (s, 1H), 2.55 (s, 3H), 1.99 – 1.94 (m, 2H), 1.29 – 1.19 (m, 8H), 0.89 (t, *J* = 5.7 Hz, 3H). <sup>13</sup>C NMR (100 MHz, CDCl<sub>3</sub>) δ 138.00, 136.58, 132.52, 128.69, 128.38, 128.16, 128.02, 127.86, 89.55, 72.90, 53.77, 31.25, 29.65, 28.49, 28.38, 22.53, 18.44, 14.07. HRMS (ESI) calcd for [C<sub>22</sub>H<sub>27</sub>NNaO<sub>2</sub>S] ([M+Na]<sup>+</sup>): 392.1655, found: 392.1655. IR (thin film) ν 1448.00, 1493.44, 2858.23, 2931.09 cm<sup>-1</sup>.

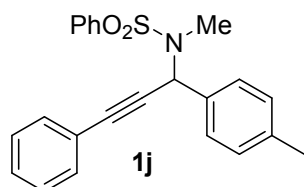

Compound **1j** was obtained as white solid (m.p. = 86-87 °C, Rf = 0.68 (petroleum ether/ ethyl acetate = 5:1)). <sup>1</sup>H NMR (400 MHz, CDCl<sub>3</sub>) δ 8.01 – 7.88 (m, 2H), 7.59 – 7.44 (m, 5H), 7.34 – 7.15 (m, 5H), 7.10 (d, *J* = 6.8 Hz, 2H), 6.24 (s, 1H), 2.64 (s, 3H), 2.36 (s, 3H). <sup>13</sup>C NMR (100 MHz, CDCl<sub>3</sub>) δ 138.27, 137.91, 133.03, 132.70, 131.59, 129.28, 128.91, 128.67, 128.22, 127.99, 127.84, 121.94, 88.61, 82.48, 53.91, 29.83, 21.18. HRMS (ESI) calcd for [C<sub>23</sub>H<sub>21</sub>NNaO<sub>2</sub>S] ([M+Na]<sup>+</sup>): 398.1185, found: 398.1184. IR (thin film) ν 1510.60, 2882.00, 2925.102970.0, 3026.20, 3057.96 cm<sup>-1</sup>.

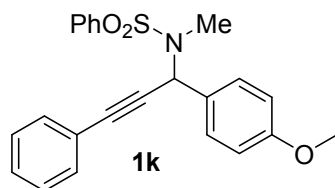

Compound **1k** was obtained as white solid (m.p. = 89-90 °C, Rf = 0.58 (petroleum ether/ ethyl acetate = 5:1)). <sup>1</sup>H NMR (600 MHz, CDCl<sub>3</sub>) δ 8.00 – 7.91 (m, 2H), 7.58 (d, *J* = 8.3 Hz, 2H), 7.54 (t, *J* = 7.3 Hz, 1H), 7.52 – 7.48 (m, 2H), 7.30 (t, *J* = 7.4 Hz, 1H), 7.27 – 7.23 (m, 2H), 7.14 – 7.08 (m, 2H), 6.95 – 6.90 (m, 2H), 6.23 (s, 1H), 3.80 (s, 3H), 2.65 (s, 3H). <sup>13</sup>C NMR (150 MHz, CDCl<sub>3</sub>) δ 159.82, 137.92, 132.84, 131.69, 129.31, 129.04, 128.82, 128.35, 128.08, 121.98, 114.02, 88.74, 82.58, 55.45, 53.73, 29.81. HRMS (ESI) calcd for [C<sub>23</sub>H<sub>21</sub>NnaO<sub>3</sub>S] ([M+Na]<sup>+</sup>): 414.1134, found: 414.1134. IR (thin film) ν 1510.33, 2838.59, 2929.89, 2957.89, 3036.67 cm<sup>-1</sup>.

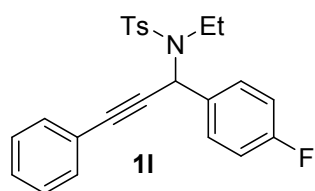

Compound **1l** was obtained as white solid (m.p. = 111-112 °C, Rf = 0.68 (petroleum ether/ ethyl acetate = 5:1)). <sup>1</sup>H NMR (400 MHz, CDCl<sub>3</sub>) δ 7.84 (d, *J* = 8.0 Hz, 2H), 7.68 (dd, *J* = 8.5, 5.3 Hz, 2H), 7.34 – 7.24 (m, 5H), 7.14 (d, *J* = 8.4 Hz, 2H), 7.06 (t, *J* = 8.5 Hz, 2H), 6.23 (s, 1H), 3.38 - 3.25 (m, 1H), 3.24 - 3.02 (m, 1H), 2.33 (s, 3H), 0.85 (t, *J* = 7.2 Hz, 3H). <sup>13</sup>C NMR (100 MHz, CDCl<sub>3</sub>) δ 162.70 (d, *J* = 247.3 Hz), 143.52, 136.04, 133.02 (d, *J* = 3.2 Hz), 131.57, 129.86 (d, *J* = 8.2 Hz), 129.57, 128.81, 128.30, 127.80, 121.86, 115.37 (d, *J* = 21.7 Hz), 88.43, 83.28, 53.60, 40.69, 21.45, 16.15. HRMS (ESI) calcd for [C<sub>24</sub>H<sub>22</sub>FNNaO<sub>2</sub>S] ([M+Na]<sup>+</sup>): 430.1247, found: 430.1249. IR (thin film) ν 1604.61, 1644.26, 2875.05, 2935.37, 2978.05 cm<sup>-1</sup>.

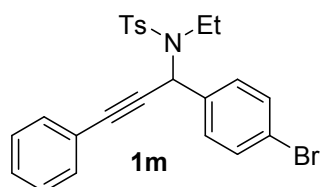

Compound **1m** was obtained as white solid (m.p. = 105-106 °C, Rf = 0.68 (petroleum ether/ ethyl acetate = 5:1)). <sup>1</sup>H NMR (600 MHz, CDCl<sub>3</sub>) δ 7.85 – 7.80 (m, 2H), 7.57 (d, *J* = 8.6 Hz, 2H), 7.53 – 7.48 (m, 2H), 7.34 – 7.25 (m, 5H), 7.15 – 7.11 (m, 2H), 6.19 (s, 1H), 3.25 - 3.29 (m, 1H), 3.02 - 3.24 (m, 1H), 2.35 (s, 3H), 0.85 (t, *J* = 7.1 Hz, 3H). <sup>13</sup>C NMR (150 MHz, CDCl<sub>3</sub>) δ 143.59, 136.41, 136.02, 131.68, 131.62, 129.84, 129.62, 128.88, 128.35, 127.87, 122.55, 121.88, 88.61, 83.00, 53.77, 40.88, 21.55, 16.19. HRMS (ESI) calcd for [C<sub>24</sub>H<sub>22</sub>BrNNaO<sub>2</sub>S] ([M+Na]<sup>+</sup>): 490.0447, found: 490.0444. IR (thin film) ν 1597.80, 2874.07, 2933.91, 2976.31, 3062.60 cm<sup>-1</sup>.

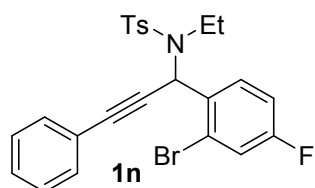

Compound **1n** was obtained as white solid (m.p. = 134-135 °C, Rf = 0.66 (petroleum ether/ ethyl acetate = 5:1)). <sup>1</sup>H NMR (600 MHz, CDCl<sub>3</sub>) δ 7.85 (d, *J* = 8.3 Hz, 2H), 7.80 (dd, *J* = 8.7, 5.9 Hz, 1H), 7.38 (dd, *J* = 8.1, 2.6 Hz, 1H), 7.35 – 7.29 (m, 1H), 7.29 – 7.25 (m, 2H), 7.18 (d, *J* = 7.9 Hz, 2H), 7.15 – 7.08 (m, 2H), 7.05 (td, *J* = 8.2, 2.5 Hz, 1H), 6.46 (s, 1H), 3.23 – 3.12 (m, 1H), 3.07 – 2.95 (m, 1H), 2.30 (s, 3H), 0.72 (t, *J* = 7.1 Hz, 3H). <sup>13</sup>C NMR (150 MHz, CDCl<sub>3</sub>) δ 162.52 (d, *J* = 252.9 Hz), 143.45, 136.01, 132.17 (d, *J* = 8.7 Hz), 131.61, 129.36, 128.89, 128.40, 128.33, 125.36 (d, *J* = 9.6 Hz),

121.87, 121.18 (d,  $J = 24.5$  Hz), 114.49 (d,  $J = 20.9$  Hz), 88.59, 84.20, 53.88, 40.25, 21.52, 15.70. HRMS (ESI) calcd for  $[C_{24}H_{21}BrFNNaO_2S]$  ( $[M+Na]^+$ ): 508.0353, found: 508.0354. IR (thin film)  $\nu$  1597.73, 2872.98, 2934.49, 2977.16, 3064.44  $cm^{-1}$ .

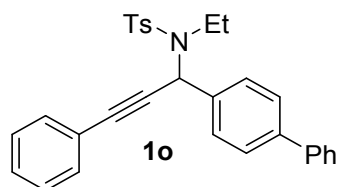

Compound **1o** was obtained as white solid (m.p. = 93-94 °C, Rf = 0.68 (petroleum ether/ ethyl acetate = 5:1)). <sup>1</sup>H NMR (400 MHz, CDCl<sub>3</sub>)  $\delta$  7.87 (d,  $J = 8.0$  Hz, 2H), 7.77 (d,  $J = 8.0$  Hz, 2H), 7.65 – 7.59 (m, 4H), 7.45 (t,  $J = 7.6$  Hz, 2H), 7.40 – 7.26 (m, 6H), 7.17 (d,  $J = 7.0$  Hz, 2H), 6.31 (s, 1H), 3.75 -3.24 (m, 1H), 3.23 - 3.10 (m, 1H), 2.37 (s, 3H), 0.90 (t,  $J = 7.2$  Hz, 3H). <sup>13</sup>C NMR (100 MHz, CDCl<sub>3</sub>)  $\delta$  143.36, 141.20, 140.47, 136.25, 136.06, 131.56, 129.51, 128.84, 128.65, 128.51, 128.24, 127.83, 127.53, 127.15, 127.13, 122.10, 88.15, 83.69, 53.94, 40.79, 21.47, 16.12. HRMS (ESI) calcd for  $[C_{30}H_{27}NNaO_2S]$  ( $[M+Na]^+$ ): 488.1655, found: 488.1656. IR (thin film)  $\nu$  1639.29, 2854.78, 2874.72, 2932.84  $cm^{-1}$ .

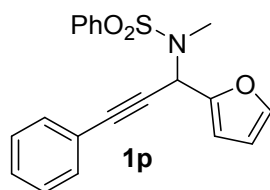

Compound **1p** was obtained as yellow liquid (Rf = 0.43 (petroleum ether/ ethyl acetate = 5:1)). <sup>1</sup>H NMR (600 MHz, CDCl<sub>3</sub>)  $\delta$  7.93 – 7.89 (m, 2H), 7.56 – 7.51 (m, 1H), 7.50 – 7.46 (m, 2H), 7.41 – 7.40 (m, 1H), 7.32 – 7.28 (m, 1H), 7.27 – 7.22 (m, 2H), 7.16 – 7.11 (m, 2H), 6.51 – 6.50 (m, 1H), 6.34 (dd,  $J = 3.2, 1.8$  Hz, 1H), 6.27 (s, 1H), 2.73 (s, 3H). <sup>13</sup>C NMR (150 MHz, CDCl<sub>3</sub>)  $\delta$  149.05, 143.61, 138.00, 132.84, 131.73, 128.96, 128.94, 128.32, 128.00, 121.68, 110.44, 110.26, 86.93, 81.07, 48.88, 30.24. HRMS (ESI) calcd for  $[C_{20}H_{17}NNaO_3S]$  ( $[M+Na]^+$ ): 374.0821, found: 374.0822. IR (thin film)  $\nu$  1446.77, 1490.87, 2929.88, 2966.80, 3061.39  $cm^{-1}$ .

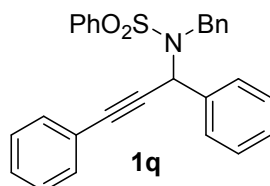

Compound **1q** was obtained as white solid (m.p. = 108-109 °C, Rf = 0.68 (petroleum ether/ ethyl acetate = 5:1)). <sup>1</sup>H NMR (600 MHz, CDCl<sub>3</sub>)  $\delta$  8.04 – 7.94 (m, 2H), 7.59 (t,  $J = 7.4$  Hz, 1H), 7.55 – 7.50 (m, 4H), 7.38 – 7.34 (m, 1H), 7.34 – 7.30 (m, 2H), 7.25 –

7.22 (m, 2H), 7.21 – 7.15 (m, 3H), 7.07 – 7.01 (m, 5H), 6.42 (s, 1H), 4.58 (d,  $J = 10.4$  Hz, 1H), 4.26 (d,  $J = 15.4$  Hz, 1H).  $^{13}\text{C}$  NMR (150 MHz,  $\text{CDCl}_3$ )  $\delta$  139.35, 136.53, 136.15, 132.87, 131.79, 129.11, 128.94, 128.72, 128.46, 128.44, 128.27, 128.22, 127.95, 127.86, 127.07, 122.05, 89.09, 83.41, 54.76, 49.37. HRMS (ESI) calcd for  $[\text{C}_{28}\text{H}_{23}\text{NNaO}_2\text{S}]$  ( $[\text{M}+\text{Na}]^+$ ): 460.1342, found: 460.1341. IR (thin film)  $\nu$  1446.37, 1492.01, 2922.60, 3031.68, 3062.26  $\text{cm}^{-1}$ .

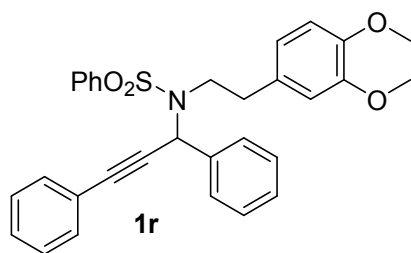

Compound **1r** was obtained as white solid (m.p. = 128-129 °C,  $R_f = 0.25$  (petroleum ether/ ethyl acetate = 5:1)).  $^1\text{H}$  NMR (600 MHz,  $\text{CDCl}_3$ )  $\delta$  8.02 – 7.94 (m, 2H), 7.72 (d,  $J = 7.7$  Hz, 2H), 7.57 – 7.52 (m, 1H), 7.51 – 7.47 (m, 2H), 7.42 (t,  $J = 7.4$  Hz, 2H), 7.37 (t,  $J = 7.3$  Hz, 1H), 7.31 – 7.27 (m, 1H), 7.26 – 7.22 (m, 2H), 7.14 – 7.09 (m, 2H), 6.67 (d,  $J = 8.2$  Hz, 1H), 6.43 (dd,  $J = 8.1, 1.9$  Hz, 1H), 6.35 (d,  $J = 1.9$  Hz, 1H), 6.29 (s, 1H), 3.79 (s, 3H), 3.74 (s, 3H), 3.40 – 3.31 (m, 1H), 3.18 – 3.13 (m, 1H), 2.81 – 2.71 (m, 1H), 2.12 – 2.03 (m, 1H).  $^{13}\text{C}$  NMR (150 MHz,  $\text{CDCl}_3$ )  $\delta$  148.82, 147.56, 139.02, 136.81, 132.81, 131.65, 131.44, 129.05, 128.86, 128.69, 128.41, 128.34, 127.91, 121.89, 120.66, 111.99, 111.20, 88.46, 83.33, 55.95, 55.83, 54.44, 47.87, 36.91. HRMS (ESI) calcd for  $[\text{C}_{31}\text{H}_{29}\text{NNaO}_4\text{S}]$  ( $[\text{M}+\text{Na}]^+$ ): 534.1710, found: 534.1708. IR (thin film)  $\nu$  1590.69, 2833.82, 2870.09, 2935.17  $\text{cm}^{-1}$ .

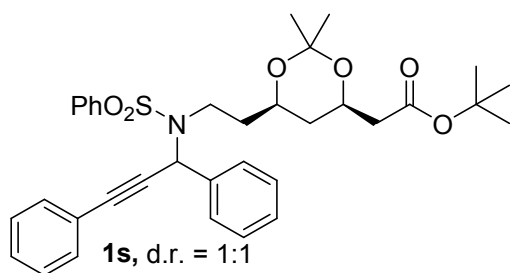

Compound **1h** was obtained as colorless liquid ( $R_f = 0.52$  (petroleum ether/ ethyl acetate = 5:1)).  $^1\text{H}$  NMR (400 MHz,  $\text{CDCl}_3$ )  $\delta$  7.97 (d,  $J = 7.8$  Hz, 2H), 7.69 (t,  $J = 7.6$  Hz, 2H), 7.60 – 7.47 (m, 3H), 7.43 – 7.24 (m, 6H), 7.17 (t,  $J = 7.3$  Hz, 2H), 6.30 (d,  $J = 7.6$  Hz, 1H), 4.15 – 4.00 (m, 1H), 3.73 – 3.45 (m, 1H), 3.42 – 3.29 (m, 1H), 3.27 – 3.03 (m, 1H), 2.36 – 2.12 (m, 2H), 1.47 – 1.40 (m, 9H), 1.39 (m, 1.5H), 1.38 – 1.29 (m, 2H), 1.30 – 1.28 (m, 1.5H), 1.25 – 1.22 (m, 3H), 0.94 – 0.83 (m, 2H).  $^{13}\text{C}$  NMR (100 MHz,  $\text{CDCl}_3$ )  $\delta$  170.26, 170.22, 138.89, 138.86, 137.06, 136.82, 132.69, 132.66,

131.60, 128.94, 128.75, 128.60, 128.55, 128.49, 128.28, 128.16, 127.87, 127.84, 121.93, 98.69, 98.50, 88.85, 88.54, 83.23, 82.90, 80.55, 80.50, 66.69, 66.13, 66.03, 65.94, 54.33, 54.18, 42.72, 42.70, 42.07, 41.94, 36.37, 36.02, 35.91, 30.01, 29.96, 28.10, 19.69, 19.66. HRMS (ESI) calcd for  $[C_{35}H_{41}NNaO_6S]$  ( $[M+Na]^+$ ): 626.2547, found: 626.2546. IR (thin film)  $\nu$  1638.29, 1727.00, 2936.94, 2979.87  $cm^{-1}$ .  $[\alpha]_D^{26.6}$  - 7.01 ( $c$  0.38,  $CHCl_3$ ).

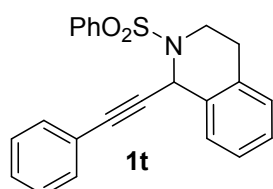

Compound **1t** was obtained as white solid (m.p. = 124-125 °C,  $R_f$  = 0.52 (petroleum ether/ ethyl acetate = 5:1)).  $^1H$  NMR (600 MHz,  $CDCl_3$ )  $\delta$  7.94 (d,  $J$  = 7.5 Hz, 2H), 7.48 – 7.39 (m, 3H), 7.30 – 7.26 (m, 1H), 7.26 – 7.15 (m, 5H), 7.14 – 7.11 (m, 1H), 7.00 (d,  $J$  = 7.2 Hz, 2H), 6.01 (s, 1H), 4.06 (dd,  $J$  = 12.4, 6.5 Hz, 1H), 3.38 (td,  $J$  = 12.2, 4.0 Hz, 1H), 3.23 – 3.08 (m, 1H), 2.90 – 2.77 (m, 1H).  $^{13}C$  NMR (150 MHz,  $CDCl_3$ )  $\delta$  139.07, 133.98, 132.72, 132.63, 131.63, 129.39, 128.90, 128.52, 128.11, 127.93, 127.72, 127.36, 126.76, 122.15, 86.67, 85.77, 48.81, 40.12, 28.78. HRMS (ESI) calcd for  $[C_{23}H_{19}NNaO_2S]$  ( $[M+Na]^+$ ): 396.1029, found: 369.1029. IR (thin film)  $\nu$  1446.29, 1489.76, 2864.23, 2926.61, 3061.05  $cm^{-1}$ .

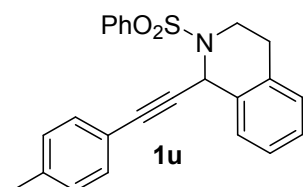

Compound **1h** was obtained as colorless liquid ( $R_f$  = 0.52 (petroleum ether/ ethyl acetate = 5:1)).  $^1H$  NMR (400 MHz,  $CDCl_3$ )  $\delta$  7.94 (d,  $J$  = 7.6 Hz, 2H), 7.42 (dt,  $J$  = 14.7, 7.0 Hz, 3H), 7.30 – 7.24 (m, 1H), 7.24 – 7.15 (m, 2H), 7.16 – 7.08 (m, 1H), 6.99 (d,  $J$  = 7.9 Hz, 2H), 6.90 (d,  $J$  = 7.9 Hz, 2H), 6.01 (s, 1H), 4.04 (dd,  $J$  = 12.5, 6.4 Hz, 1H), 3.38 (td,  $J$  = 12.2, 4.1 Hz, 1H), 3.14 (ddd,  $J$  = 18.0, 11.9, 6.5 Hz, 1H), 2.82 (dd,  $J$  = 16.5, 3.9 Hz, 1H), 2.29 (s, 3H).  $^{13}C$  NMR (100 MHz,  $CDCl_3$ )  $\delta$  139.07, 138.54, 134.09, 132.58, 132.53, 131.44, 129.26, 128.78, 128.76, 127.85, 127.57, 127.28, 126.63, 119.02, 86.72, 85.01, 48.78, 40.01, 28.71, 21.46. HRMS (ESI) calcd for  $[C_{24}H_{21}NNaO_2S]$  ( $[M+Na]^+$ ): 410.1185, found: 410.1186. IR (thin film)  $\nu$  1509.07, 1644.39, 2866.97, 2924.75, 3030.04  $cm^{-1}$ .

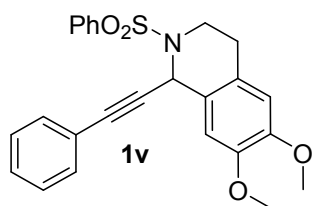

Compound **1h** was obtained as yellow solid (m.p. = 63-64 °C, Rf = 0.16 (petroleum ether/ ethyl acetate = 5:1)). <sup>1</sup>H NMR (600 MHz, CDCl<sub>3</sub>) δ 7.94 – 7.89 (m, 2H), 7.44 (t, *J* = 7.3 Hz, 1H), 7.40 (t, *J* = 7.3 Hz, 2H), 7.25 – 7.22 (m, 1H), 7.18 (t, *J* = 7.4 Hz, 2H), 7.06 – 6.95 (m, 2H), 6.73 (s, 1H), 6.57 (s, 1H), 5.91 (s, 1H), 4.04 (dd, *J* = 12.5, 6.5 Hz, 1H), 3.86 (s, 3H), 3.83 (s, 3H), 3.34 (td, *J* = 12.3, 4.1 Hz, 1H), 3.11 – 3.02 (m, 1H), 2.72 (dd, *J* = 16.2, 2.9 Hz, 1H). <sup>13</sup>C NMR (150 MHz, CDCl<sub>3</sub>) δ 148.64, 147.98, 139.15, 132.66, 131.63, 128.87, 128.50, 128.11, 127.87, 125.78, 124.72, 122.19, 111.46, 109.72, 86.41, 85.90, 56.15, 55.99, 48.44, 40.12, 28.38. HRMS (ESI) calcd for [C<sub>25</sub>H<sub>23</sub>NNaO<sub>4</sub>S] ([M+Na]<sup>+</sup>): 456.1240, found: 456.1240. IR (thin film) ν 1489.56, 1518.76, 2835.24, 2933.10 cm<sup>-1</sup>.

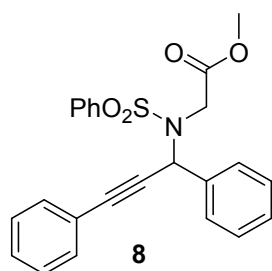

Compound **8** was obtained as white solid (m.p. = 77-78 °C, Rf = 0.51 (petroleum ether/ ethyl acetate = 5:1)). <sup>1</sup>H NMR (600 MHz, CDCl<sub>3</sub>) δ 8.07 – 7.95 (m, 2H), 7.65 (d, *J* = 7.5 Hz, 2H), 7.58 (t, *J* = 7.4 Hz, 1H), 7.53 (t, *J* = 7.5 Hz, 2H), 7.37 (t, *J* = 7.3 Hz, 2H), 7.34 – 7.30 (m, 2H), 7.27 (t, *J* = 7.4 Hz, 2H), 7.22 – 7.13 (m, 2H), 6.20 (s, 1H), 3.98 (d, *J* = 17.5 Hz, 1H), 3.88 (d, *J* = 17.5 Hz, 1H), 3.38 (s, 3H). <sup>13</sup>C NMR (150 MHz, CDCl<sub>3</sub>) δ 169.26, 139.00, 135.12, 133.16, 131.76, 129.12, 129.00, 128.88, 128.62, 128.55, 128.39, 128.10, 121.73, 88.55, 82.76, 54.46, 52.12, 45.97. HRMS (ESI) calcd for [C<sub>24</sub>H<sub>21</sub>NNaO<sub>4</sub>S] ([M+Na]<sup>+</sup>): 442.1083, found: 442.1085. IR (thin film) ν 1739.41, 1760.98, 2951.37, 3033.04, 3063.36 cm<sup>-1</sup>.

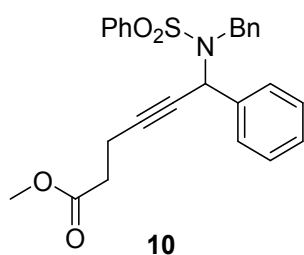

Compound **10** was obtained as white solid (m.p. = 82-83 °C, Rf = 0.46 (petroleum ether/ethyl acetate = 5:1)). <sup>1</sup>H NMR (400 MHz, CDCl<sub>3</sub>) δ 7.89 (d, *J* = 7.9 Hz, 2H), 7.61 (t, *J* = 7.1 Hz, 1H), 7.53 (t, *J* = 7.6 Hz, 2H), 7.39 – 7.35 (m, 2H), 7.16 – 7.08 (m, 3H), 7.03 – 6.89 (m, 5H), 6.10 (s, 1H), 4.44 (d, *J* = 15.4 Hz, 1H), 4.11 (d, *J* = 15.4 Hz, 1H), 3.68 (s, 3H), 2.41 – 2.31 (m, 4H). <sup>13</sup>C NMR (100 MHz, CDCl<sub>3</sub>) δ 172.07, 139.37, 136.53, 136.14, 132.63, 128.83, 128.50, 128.26, 127.99, 127.94, 127.84, 127.66, 126.85, 87.54, 74.99, 54.17, 51.89, 48.95, 33.11, 14.55. HRMS (ESI) calcd for [C<sub>26</sub>H<sub>25</sub>NNaO<sub>4</sub>S] ([M+Na]<sup>+</sup>): 460.1342, found: 460.1341. IR (thin film) ν 1644.39, 1737.03, 2849.83, 2922.26, 2952.68 cm<sup>-1</sup>.



## Synthesis of pentasubstituted pyrroles

**General procedure A:** In a flame-dried Schlenk tube, propargyl sulfonamide **1** (0.2 mmol, 1 equiv), TMS-CN (0.6 mmol, 3 equiv) and Cs<sub>2</sub>CO<sub>3</sub> (0.6 mmol, 3 equiv) were dissolved in DMF (2 mL) under a nitrogen atmosphere. The reaction mixture was stirred at 80 °C for 10 h. Upon completion of the reaction as monitored by TLC, the reaction was quenched with water (5 mL). The aqueous layer was extracted with ethyl acetate and the combined organic layers were washed with brine (10 mL\*3), water (10 mL\*3), dried over MgSO<sub>4</sub> and filtered. Then the solution was concentrated under reduced pressure. The crude material was purified by neutral alumina flash chromatography to yield the corresponding pentasubstituted pyrrole.

## Characterization data for pentasubstituted pyrroles

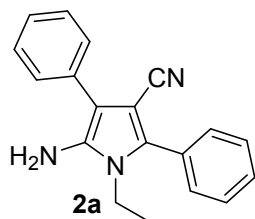

Following the general procedure **A**, **2a** was obtained as a brown solid (37.3 mg, 65% yield, m.p. = 151-152 °C, R<sub>f</sub> = 0.45 (petroleum ether/ ethyl acetate = 2:1)). <sup>1</sup>H NMR (400 MHz, CDCl<sub>3</sub>) δ 7.51 (d, *J* = 7.8 Hz, 2H), 7.49 – 7.35 (m, 7H), 7.27 (d, *J* = 7.4 Hz, 1H), 3.90 (q, *J* = 7.1 Hz, 2H), 3.49 (s, 2H), 1.27 (t, *J* = 7.1 Hz, 3H). <sup>13</sup>C NMR (100 MHz, CDCl<sub>3</sub>) δ 136.50, 133.27, 133.11, 129.91, 129.58, 129.08, 128.89, 128.71, 128.05, 126.47, 117.66, 109.57, 90.45, 38.85, 15.76. HRMS (DART) calcd for [C<sub>19</sub>H<sub>18</sub>N<sub>3</sub>]<sup>+</sup> ([M+H]<sup>+</sup>): 288.1495, found: 288.1496. IR (thin film) ν 2211.10 cm<sup>-1</sup>.

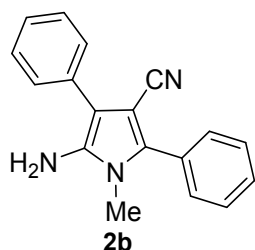

Following the general procedure **A**, **2b** was obtained as a brown liquid (36.0 mg, 66% yield, R<sub>f</sub> = 0.34 (petroleum ether/ ethyl acetate = 2:1)). <sup>1</sup>H NMR (400 MHz, CDCl<sub>3</sub>) δ 7.52 – 7.37 (m, 9H), 7.31 – 7.25 (m, 1H), 3.49 (m, 5H). <sup>13</sup>C NMR (100 MHz, CDCl<sub>3</sub>) δ 136.61, 134.05, 133.08, 129.61, 129.33, 129.10, 128.87, 128.55, 128.00, 126.50, 117.69, 109.12, 90.05, 31.25. HRMS (ESI) calcd for [C<sub>18</sub>H<sub>15</sub>N<sub>3</sub>Na]<sup>+</sup> ([M+Na]<sup>+</sup>): 296.1158, found: 296.1160. IR (thin film) ν 2209.60 cm<sup>-1</sup>.

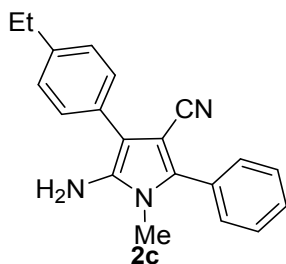

Following the general procedure **A**, **2c** was obtained as a brown liquid (47.0 mg, 78% yield, R<sub>f</sub> = 0.41 (petroleum ether/ ethyl acetate = 2:1)). <sup>1</sup>H NMR (600 MHz, CDCl<sub>3</sub>) δ 7.46 – 7.43 (m, 4H), 7.42 – 7.36 (m, 3H), 7.29 – 7.25 (m, 2H), 3.50 (s, 2H), 3.46 (s,

3H), 2.67 (q,  $J = 7.6$  Hz, 2H), 1.26 (t,  $J = 7.6$  Hz, 3H).  $^{13}\text{C}$  NMR (150 MHz,  $\text{CDCl}_3$ )  $\delta$  142.59, 136.48, 134.12, 130.43, 129.78, 129.38, 128.93, 128.68, 128.54, 128.02, 118.02, 109.14, 90.05, 31.33, 28.69, 15.66. HRMS (ESI) calcd for  $[\text{C}_{20}\text{H}_{19}\text{N}_3\text{Na}]$  ( $[\text{M}+\text{Na}]^+$ ): 324.1471, found: 324.1471. IR (thin film)  $\nu$  2209.93  $\text{cm}^{-1}$ .

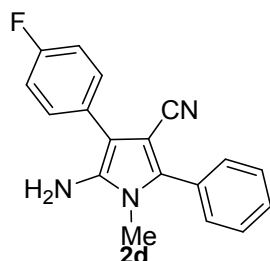

Following the general procedure **A**, **2d** was obtained as a brown solid (37.2 mg, 64% yield, m.p. = 160-161  $^{\circ}\text{C}$ ,  $R_f = 0.31$  (petroleum ether/ ethyl acetate = 2:1)).  $^1\text{H}$  NMR (600 MHz,  $\text{CDCl}_3$ )  $\delta$  7.49 – 7.43 (m, 6H), 7.42 – 7.38 (m, 1H), 7.15 – 7.09 (m, 2H), 3.49 (s, 3H), 3.45 (s, 2H).  $^{13}\text{C}$  NMR (100 MHz,  $\text{CDCl}_3$ )  $\delta$  161.55 (d,  $J = 246.1$  Hz), 136.58, 133.84, 129.71 (d,  $J = 8.0$  Hz), 129.51, 129.30, 129.03, 128.90, 128.62, 117.54, 116.03 (d,  $J = 21.4$  Hz), 108.44, 90.09, 31.27. HRMS (ESI) calcd for  $[\text{C}_{18}\text{H}_{14}\text{FN}_3\text{Na}]$  ( $[\text{M}+\text{Na}]^+$ ): 314.1064, found: 314.1065. IR (thin film)  $\nu$  2209.30  $\text{cm}^{-1}$ .

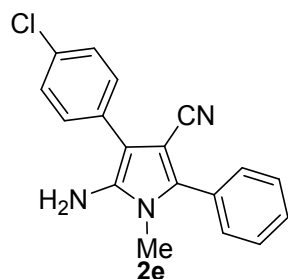

Following the general procedure **A**, **2e** was obtained as a brown solid (39.3 mg, 64% yield, m.p. = 103-104  $^{\circ}\text{C}$ ,  $R_f = 0.34$  (petroleum ether/ ethyl acetate = 2:1)).  $^1\text{H}$  NMR (600 MHz,  $\text{CDCl}_3$ )  $\delta$  7.49 – 7.45 (m, 4H), 7.45 – 7.41 (m, 3H), 7.41 – 7.38 (m, 3H), 3.49 (s, 3H), 3.47 (s, 2H).  $^{13}\text{C}$  NMR (150 MHz,  $\text{CDCl}_3$ )  $\delta$  136.90, 134.16, 132.32, 131.63, 129.50, 129.38, 129.35, 129.30, 129.00, 128.77, 117.53, 108.07, 90.03, 31.34. HRMS (ESI) calcd for  $[\text{C}_{18}\text{H}_{14}\text{ClN}_3\text{Na}]$  ( $[\text{M}+\text{Na}]^+$ ): 330.0768, found: 330.0767. IR (thin film)  $\nu$  2211.78  $\text{cm}^{-1}$ .

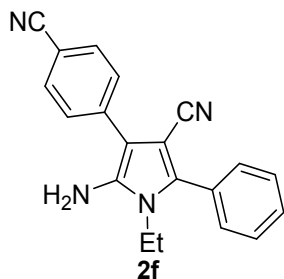

Following the general procedure **A**, **2f** was obtained as a brown liquid (41.8 mg, 67% yield,  $R_f = 0.21$  (petroleum ether/ ethyl acetate = 2:1)).  $^1\text{H}$  NMR (600 MHz,  $\text{CDCl}_3$ )  $\delta$  7.73 – 7.68 (m, 2H), 7.66 – 7.61 (m, 2H), 7.53 – 7.47 (m, 2H), 7.46 – 7.43 (m, 3H), 3.90 (q,  $J = 7.2$  Hz, 2H), 3.61 (s, 2H), 1.30 (t,  $J = 7.2$  Hz, 3H).  $^{13}\text{C}$  NMR (150 MHz,  $\text{CDCl}_3$ )  $\delta$  138.36, 137.59, 134.64, 132.91, 129.62, 129.40, 129.20, 129.09, 128.08, 119.21, 117.24, 109.29, 106.98, 90.18, 38.98, 15.62. HRMS (ESI) calcd for  $[\text{C}_{20}\text{H}_{16}\text{N}_4\text{Na}]$  ( $[\text{M}+\text{Na}]^+$ ): 335.1267, found: 335.1267. IR (thin film)  $\nu$  2213.94  $\text{cm}^{-1}$ .

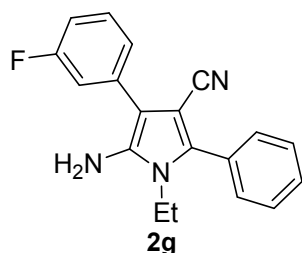

Following the general procedure **A**, **2g** was obtained as a brown solid (48.8 mg, 80% yield, m.p. = 112–113 °C,  $R_f = 0.45$  (petroleum ether/ ethyl acetate = 2:1)).  $^1\text{H}$  NMR (600 MHz,  $\text{CDCl}_3$ )  $\delta$  7.49 – 7.36 (m, 6H), 7.29 (d,  $J = 7.6$  Hz, 1H), 7.21 (d,  $J = 10.0$  Hz, 1H), 6.95 (t,  $J = 7.5$  Hz, 1H), 3.89 (q,  $J = 7.2$  Hz, 2H), 1.27 (t,  $J = 7.2$  Hz, 3H).  $^{13}\text{C}$  NMR (150 MHz,  $\text{CDCl}_3$ )  $\delta$  163.29 (d,  $J = 246.7$  Hz), 136.86, 135.38 (d,  $J = 9.7$  Hz), 133.69, 130.68 (d,  $J = 8.6$  Hz), 129.72, 129.64, 129.00, 128.93, 123.75, 117.46, 114.73 (d,  $J = 21.6$  Hz), 113.33 (d,  $J = 21.6$  Hz), 108.15, 90.38, 38.94, 15.75. HRMS (ESI) calcd for  $[\text{C}_{19}\text{H}_{16}\text{FN}_3\text{Na}]$  ( $[\text{M}+\text{Na}]^+$ ): 328.1220, found: 328.1222. IR (thin film)  $\nu$  2211.63  $\text{cm}^{-1}$ .

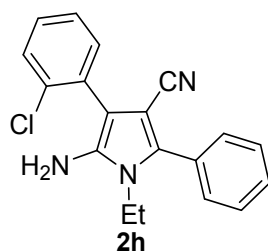

Following the general procedure **A**, **2h** was obtained as a brown liquid (39.8 mg, 62% yield, Rf = 0.48 (petroleum ether/ ethyl acetate = 2:1)). <sup>1</sup>H NMR (600 MHz, CDCl<sub>3</sub>) δ 7.51 – 7.43 (m, 6H), 7.43 – 7.39 (m, 1H), 7.33 (td, *J* = 7.6, 1.3 Hz, 1H), 7.27 (td, *J* = 7.7, 1.8 Hz, 1H), 3.93 (q, *J* = 7.2 Hz, 2H), 3.27 (s, 2H), 1.27 (t, *J* = 7.1 Hz, 3H). <sup>13</sup>C NMR (150 MHz, CDCl<sub>3</sub>) δ 136.60, 133.72, 133.53, 132.69, 131.62, 130.09, 129.96, 129.62, 128.95, 128.89, 128.80, 127.26, 117.33, 108.70, 91.60, 39.00, 15.96. HRMS (ESI) calcd for [C<sub>19</sub>H<sub>16</sub>ClN<sub>3</sub>Na] ([M+Na]<sup>+</sup>): 344.0925, found: 344.0925. IR (thin film) ν 2212.23 cm<sup>-1</sup>.

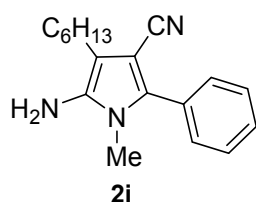

Following the general procedure **A**, **2i** was obtained as a brown liquid (29.8 mg, 53% yield, Rf = 0.45 (petroleum ether/ ethyl acetate = 2:1)). <sup>1</sup>H NMR (600 MHz, CDCl<sub>3</sub>) δ 7.46 – 7.38 (m, 4H), 7.37 – 7.32 (m, 1H), 3.44 (s, 3H), 3.01 (s, 2H), 2.48 (t, *J* = 7.5 Hz, 2H), 1.61 – 1.54 (m, 2H), 1.39 – 1.32 (m, 2H), 1.32 – 1.28 (m, 4H), 0.88 (t, *J* = 6.9 Hz, 3H). <sup>13</sup>C NMR (150 MHz, CDCl<sub>3</sub>) δ 135.53, 132.67, 130.18, 129.18, 128.83, 128.24, 117.90, 111.53, 90.69, 31.81, 31.19, 30.60, 29.24, 24.69, 22.76, 14.22. HRMS (ESI) calcd for [C<sub>18</sub>H<sub>23</sub>N<sub>3</sub>Na] ([M+Na]<sup>+</sup>): 304.1784, found: 304.1784. IR (thin film) ν 2202.50 cm<sup>-1</sup>.

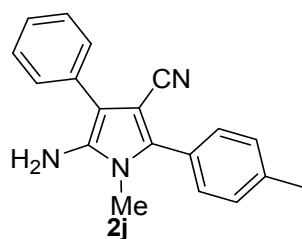

Following the general procedure **A**, **2j** was obtained as a brown solid (46.5 mg, 81% yield, Rf = 0.36 (petroleum ether/ ethyl acetate = 2:1)). <sup>1</sup>H NMR (600 MHz, CDCl<sub>3</sub>) δ 7.51 – 7.47 (m, 2H), 7.43 (t, *J* = 7.7 Hz, 2H), 7.36 (d, *J* = 8.0 Hz, 2H), 7.29 – 7.25 (m, 3H), 3.48 (s, 5H), 2.40 (s, 3H). <sup>13</sup>C NMR (150 MHz, CDCl<sub>3</sub>) δ 138.67, 136.95, 133.95, 133.25, 129.66, 129.30, 129.16, 128.04, 126.75, 126.50, 117.97, 108.96, 89.75, 31.27, 21.44. HRMS (ESI) calcd for [C<sub>19</sub>H<sub>17</sub>N<sub>3</sub>Na] ([M+Na]<sup>+</sup>): 310.1315, found: 310.1316. IR (thin film) ν 2207.86 cm<sup>-1</sup>.

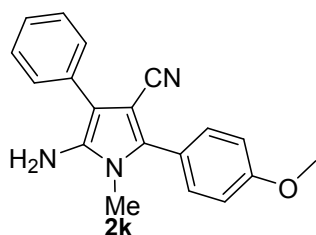

Following the general procedure **A**, **2k** was obtained as a brown liquid (42.4 mg, 70% yield,  $R_f = 0.24$  (petroleum ether/ ethyl acetate = 2:1)).  $^1\text{H}$  NMR (400 MHz,  $\text{CDCl}_3$ )  $\delta$  7.52 – 7.46 (m, 2H), 7.43 (t,  $J = 7.6$  Hz, 2H), 7.40 – 7.36 (m, 2H), 7.29 – 7.23 (m, 1H), 7.02 – 6.96 (m, 2H), 3.84 (s, 3H), 3.48 (s, 2H), 3.45 (s, 3H).  $^{13}\text{C}$  NMR (100 MHz,  $\text{CDCl}_3$ )  $\delta$  159.82, 136.74, 133.67, 133.22, 130.72, 129.06, 127.94, 126.38, 121.94, 117.97, 114.36, 108.75, 89.47, 55.38, 31.10. HRMS (ESI) calcd for  $[\text{C}_{19}\text{H}_{17}\text{N}_3\text{NaO}]$  ( $[\text{M}+\text{Na}]^+$ ): 326.1264, found: 326.1263. IR (thin film)  $\nu$  2207.57  $\text{cm}^{-1}$ .

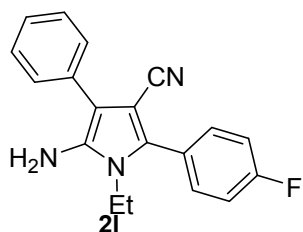

Following the general procedure **A**, **2l** was obtained as a brown solid (48.2 mg, 79% yield, m.p. = 179-180  $^\circ\text{C}$ ,  $R_f = 0.39$  (petroleum ether/ ethyl acetate = 2:1)).  $^1\text{H}$  NMR (400 MHz,  $\text{CDCl}_3$ )  $\delta$  7.50 (d,  $J = 8.2$  Hz, 2H), 7.45 – 7.41 (m, 4H), 7.31 – 7.24 (m, 1H), 7.21 – 7.12 (m, 2H), 3.87 (q,  $J = 7.2$  Hz, 2H), 3.48 (s, 2H), 1.26 (t,  $J = 7.2$  Hz, 3H).  $^{13}\text{C}$  NMR (100 MHz,  $\text{CDCl}_3$ )  $\delta$  162.92 (d,  $J = 249.2$  Hz), 135.27, 133.28, 132.97, 131.50 (d,  $J = 8.4$  Hz), 129.09, 128.00, 126.52, 125.97 (d,  $J = 3.4$  Hz), 117.49, 116.06 (d,  $J = 21.8$  Hz), 109.53, 90.69, 38.80, 15.73. HRMS (ESI) calcd for  $[\text{C}_{19}\text{H}_{16}\text{FN}_3\text{Na}]$  ( $[\text{M}+\text{Na}]^+$ ): 328.1220, found: 328.1216. IR (thin film)  $\nu$  2210.73  $\text{cm}^{-1}$ .

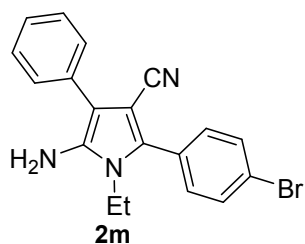

Following the general procedure **A**, **2m** was obtained as a brown solid (55.5 mg, 76% yield, m.p. = 143-144  $^\circ\text{C}$ ,  $R_f = 0.45$  (petroleum ether/ ethyl acetate = 2:1)).  $^1\text{H}$  NMR (600 MHz,  $\text{CDCl}_3$ )  $\delta$  7.63 – 7.57 (m, 2H), 7.50 – 7.47 (m, 2H), 7.43 (t,  $J = 7.7$  Hz, 2H), 7.35 – 7.32 (m, 2H), 7.29 – 7.25 (m, 1H), 3.88 (q,  $J = 7.2$  Hz, 2H), 3.49 (s, 2H), 1.27 (t,  $J = 7.2$  Hz, 3H).  $^{13}\text{C}$  NMR (150 MHz,  $\text{CDCl}_3$ )  $\delta$  135.04, 133.71, 132.92, 132.26, 131.10, 129.19, 128.86, 128.09, 126.69, 123.12, 117.43, 109.87, 90.96, 38.98, 15.84.

HRMS (ESI) calcd for  $[C_{19}H_{16}BrN_3Na]$  ( $[M+Na]^+$ ): 388.0420, found: 388.0421. IR (thin film)  $\nu$  2210.48  $cm^{-1}$ .

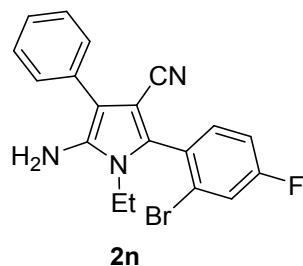

Following the general procedure **A**, **2n** was obtained as a brown liquid (55.2 mg, 72% yield,  $R_f = 0.45$  (petroleum ether/ ethyl acetate = 2:1)).  $^1H$  NMR (400 MHz,  $CDCl_3$ )  $\delta$  7.56 – 7.50 (m, 2H), 7.49 – 7.39 (m, 4H), 7.32 – 7.25 (m, 1H), 7.16 (td,  $J = 8.2, 2.6$  Hz, 1H), 3.92 - 3.75 (m, 1H), 3.74 - 3.61 (m, 1H), 3.48 (s, 2H), 1.17 (t,  $J = 7.2$  Hz, 3H).  $^{13}C$  NMR (150 MHz,  $CDCl_3$ )  $\delta$  163.03 (d,  $J = 254.3$  Hz), 134.26 (d,  $J = 8.8$  Hz), 133.24, 133.01, 132.82, 129.15, 128.02, 127.49 (d,  $J = 4.0$  Hz), 126.59, 126.33 (d,  $J = 9.9$  Hz), 120.71 (d,  $J = 24.6$  Hz), 116.81, 115.17 (d,  $J = 21.6$  Hz), 109.60, 91.81, 39.05, 15.54. HRMS (ESI) calcd for  $[C_{19}H_{15}BrFN_3Na]$  ( $[M+Na]^+$ ): 406.0326, found: 406.0327. IR (thin film)  $\nu$  2214.18  $cm^{-1}$ .

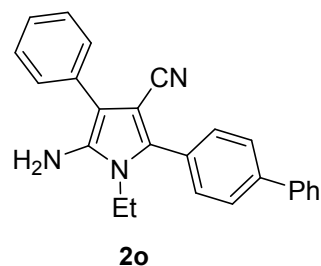

Following the general procedure **A**, **2o** was obtained as a yellow solid (56.6 mg, 78% yield, m.p. = 183-184  $^{\circ}C$ ,  $R_f = 0.45$  (petroleum ether/ ethyl acetate = 2:1)). NMR (600 MHz,  $CDCl_3$ )  $\delta$  7.69 (d,  $J = 8.2$  Hz, 2H), 7.63 (d,  $J = 7.8$  Hz, 2H), 7.54 – 7.51 (m, 4H), 7.48 – 7.43 (m, 4H), 7.38 (t,  $J = 7.4$  Hz, 1H), 7.28 (t,  $J = 7.7$  Hz, 1H), 3.94 (q,  $J = 7.2$  Hz, 2H), 3.51 (s, 2H), 1.31 (t,  $J = 7.2$  Hz, 3H).  $^{13}C$  NMR (100 MHz,  $CDCl_3$ )  $\delta$  141.37, 140.30, 136.14, 133.63, 133.12, 129.87, 129.10, 128.93, 128.76, 128.04, 127.70, 127.57, 127.11, 126.48, 117.83, 109.51, 90.49, 38.97, 15.80. HRMS (ESI) calcd for  $[C_{25}H_{21}N_3Na]$  ( $[M+Na]^+$ ): 386.1628, found: 386.1627. IR (thin film)  $\nu$  2210.51  $cm^{-1}$ .

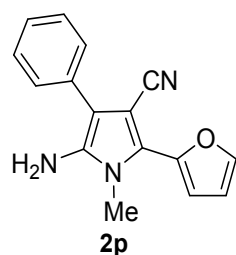

Following the general procedure **A**, **2p** was obtained as a brown liquid (32.0 mg, 61% yield,  $R_f = 0.21$  (petroleum ether/ ethyl acetate = 2:1)).  $^1\text{H NMR}$  (600 MHz,  $\text{CDCl}_3$ )  $\delta$  7.51 (d,  $J = 1.9$  Hz, 1H), 7.47 – 7.41 (m, 5H), 7.28 (t,  $J = 7.2$  Hz, 1H), 6.80 (d,  $J = 3.4$  Hz, 1H), 6.52 (dd,  $J = 3.4, 1.9$  Hz, 1H), 3.67 (s, 3H).  $^{13}\text{C NMR}$  (150 MHz,  $\text{CDCl}_3$ )  $\delta$  144.34, 142.43, 134.49, 132.81, 129.20, 128.12, 126.78, 126.29, 117.31, 111.70, 109.95, 109.76, 89.78, 31.69. HRMS (ESI) calcd for  $[\text{C}_{16}\text{H}_{13}\text{N}_3\text{NaO}]$  ( $[\text{M}+\text{Na}]^+$ ): 286.0951, found: 286.0951. IR (thin film)  $\nu$  2209.37  $\text{cm}^{-1}$ .

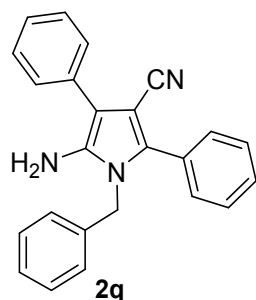

Following the general procedure **A**, **2q** was obtained as a yellow solid (37.7 mg, 54% yield, m.p. = 193-194 °C,  $R_f = 0.6$  (petroleum ether/ ethyl acetate = 2:1)).  $^1\text{H NMR}$  (400 MHz,  $\text{CDCl}_3$ )  $\delta$  7.54 (d,  $J = 7.4$  Hz, 2H), 7.48 – 7.36 (m, 9H), 7.34 – 7.26 (m, 2H), 7.09 (d,  $J = 7.4$  Hz, 2H), 5.14 (s, 2H), 3.36 (s, 2H).  $^{13}\text{C NMR}$  (100 MHz,  $\text{CDCl}_3$ )  $\delta$  137.04, 136.57, 134.11, 132.95, 129.46, 129.37, 129.29, 129.12, 128.97, 128.78, 128.02, 127.99, 126.55, 125.70, 117.57, 109.17, 90.78, 47.54. HRMS (DART) calcd for  $[\text{C}_{24}\text{H}_{20}\text{N}_3]^+$  ( $[\text{M}+\text{H}]^+$ ): 350.1652, found: 350.1652. IR (thin film)  $\nu$  2211.83  $\text{cm}^{-1}$ .

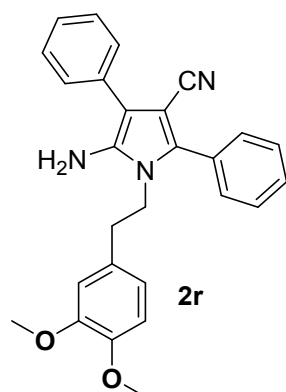

Following the general procedure **A**, **2r** was obtained as a brown liquid (39.8 mg, 47% yield,  $R_f = 0.45$  (petroleum ether/ ethyl acetate = 2:1)).  $^1\text{H NMR}$  (600 MHz,  $\text{CDCl}_3$ )  $\delta$  7.45 – 7.38 (m, 7H), 7.35 – 7.31 (m, 2H), 7.29 – 7.21 (m, 1H), 6.70 (d,  $J = 8.1$  Hz, 1H), 6.45 (dd,  $J = 8.1, 1.9$  Hz, 1H), 6.27 (d,  $J = 1.9$  Hz, 1H), 4.12 (t,  $J = 7.0$  Hz, 2H), 3.83 (s, 3H), 3.69 (s, 3H), 3.06 (s, 2H), 2.71 (t,  $J = 6.7$  Hz, 2H).  $^{13}\text{C NMR}$  (150 MHz,  $\text{CDCl}_3$ )  $\delta$  149.04, 148.10, 136.84, 133.84, 133.13, 130.06, 129.93, 129.78, 129.18, 128.88, 128.82, 128.12, 126.61, 120.87, 117.64, 111.74, 111.39, 109.73, 90.68, 56.04, 55.76,



45.24, 35.98. HRMS (DART) calcd for  $[C_{27}H_{26}O_2N_3]^+$  ( $[M+H]^+$ ): 424.2020, found: 424.2020. IR (thin film)  $\nu$  2210.37,  $cm^{-1}$ .

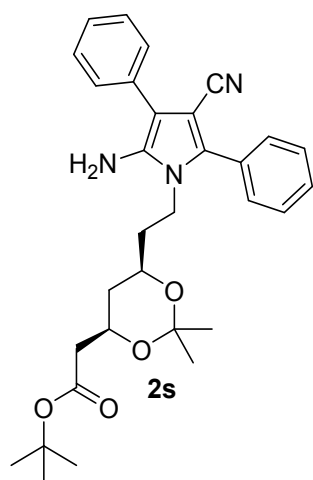

Following the general procedure **A**, **2s** was obtained as a brown liquid (69.0 mg, 67% yield,  $R_f = 0.21$  (petroleum ether/ ethyl acetate = 2:1)).  $^1H$  NMR (600 MHz,  $CDCl_3$ )  $\delta$  7.51 – 7.48 (m, 2H), 7.47 – 7.37 (m, 7H), 7.27 – 7.24 (m, 1H), 4.20 – 4.15 (m, 1H), 4.01 (td,  $J = 13.6, 12.3, 6.2$  Hz, 2H), 3.85 (s, 2H), 3.77 – 3.60 (m, 1H), 2.36 (dd,  $J = 15.3, 7.1$  Hz, 1H), 2.23 (dd,  $J = 15.3, 6.0$  Hz, 1H), 1.82 – 1.60 (m, 4H), 1.47 – 1.43 (m, 1H), 1.41 (s, 9H), 1.40 – 1.38 (m, 1H), 1.35 (s, 3H), 1.32 (s, 3H).  $^{13}C$  NMR (150 MHz,  $CDCl_3$ )  $\delta$  170.16, 136.03, 134.36, 133.29, 129.99, 129.57, 129.18, 129.01, 128.77, 127.97, 126.40, 117.74, 107.79, 99.07, 90.78, 80.89, 77.35, 77.14, 76.93, 66.03, 65.99, 42.49, 39.13, 36.72, 36.08, 30.08, 28.17, 19.79. HRMS (DART) calcd for  $[C_{31}H_{38}O_4N_3]^+$  ( $[M+H]^+$ ): 516.2857, found: 516.2856. IR (thin film)  $\nu$  2212.20, 1726.00  $cm^{-1}$ .  $[\alpha]_D^{26.6}$  23.69 ( $c$  0.38,  $CHCl_3$ ).

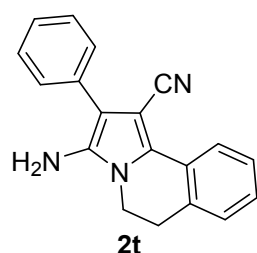

Following the general procedure **A**, **2t** was obtained as a brown liquid (43.9 mg, 77% yield,  $R_f = 0.26$  (petroleum ether/ ethyl acetate = 2:1)).  $^1H$  NMR (400 MHz,  $CDCl_3$ )  $\delta$  8.18 (d,  $J = 7.8$  Hz, 1H), 7.59 – 7.35 (m, 4H), 7.35 – 7.20 (m, 4H), 3.97 (t,  $J = 6.6$  Hz, 2H), 3.50 (s, 2H), 3.09 (t,  $J = 6.6$  Hz, 2H).  $^{13}C$  NMR (100 MHz,  $CDCl_3$ )  $\delta$  132.80, 132.46, 130.80, 130.32, 129.12, 128.13, 128.00, 127.83, 127.50, 127.14, 126.67,

123.51, 118.23, 110.72, 86.17, 39.22, 28.72. HRMS (DART) calcd for  $[C_{19}H_{16}N_3]^+$  ( $[M+H]^+$ ): 286.1339, found: 286.1340. IR (thin film)  $\nu$  2205.09  $cm^{-1}$ .

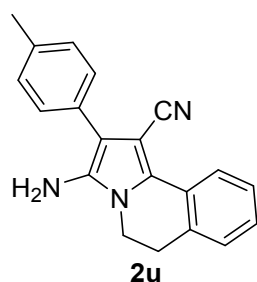

Following the general procedure **A**, **2u** was obtained as a brown liquid (44.3 mg, 74% yield,  $R_f = 0.30$  (petroleum ether/ ethyl acetate = 2:1)).  $^1H$  NMR (400 MHz,  $DMSO-d_6$ )  $\delta$  7.95 (d,  $J = 7.5$  Hz, 1H), 7.45 – 7.28 (m, 4H), 7.28 – 7.18 (m, 3H), 5.11 (s, 2H), 3.97 (t,  $J = 6.4$  Hz, 2H), 3.04 (t,  $J = 6.1$  Hz, 2H), 2.33 (s, 3H).  $^{13}C$  NMR (100 MHz,  $DMSO-d_6$ )  $\delta$  136.45, 135.24, 131.80, 130.72, 129.74, 128.89, 128.65, 127.99, 127.74, 127.42, 127.29, 122.18, 119.03, 105.91, 85.27, 28.40, 21.22. HRMS (ESI) calcd for  $[C_{20}H_{18}N_3]$  ( $[M+H]^+$ ): 300.1495, found: 300.1496. IR (thin film)  $\nu$  2212.23  $cm^{-1}$ .

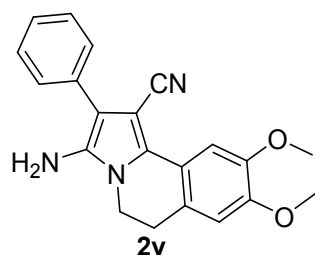

Following the general procedure **A**, **2v** was obtained as a brown liquid (30.4 mg, 44% yield,  $R_f = 0.1$  (petroleum ether/ ethyl acetate = 2:1)).  $^1H$  NMR (600 MHz,  $DMSO-d_6$ )  $\delta$  7.52 (s, 1H), 7.43 (d,  $J = 7.0$  Hz, 2H), 7.38 (t,  $J = 7.8$  Hz, 2H), 7.19 (t,  $J = 7.3$  Hz, 1H), 6.93 (s, 1H), 5.07 (s, 2H), 3.89 (t,  $J = 6.7$  Hz, 2H), 3.76 (s, 3H), 3.73 (s, 3H), 2.94 (t,  $J = 6.7$  Hz, 2H).  $^{13}C$  NMR (150 MHz,  $DMSO-d_6$ )  $\delta$  148.59, 148.30, 136.20, 133.99, 129.96, 129.22, 127.97, 125.94, 124.93, 119.86, 119.50, 112.57, 106.30, 104.99, 83.69, 56.13, 56.01, 27.92. HRMS (ESI) calcd for  $[C_{21}H_{20}O_2N_3]$  ( $[M+H]^+$ ): 346.1550, found: 346.1551. IR (thin film)  $\nu$  2212.23  $cm^{-1}$ .

# Synthesis of substituted pyrrole **2a** directly from allene

## **3a**

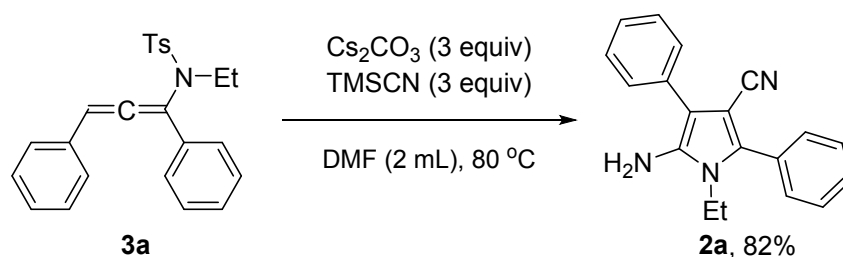

In a flame-dried Schlenk tube, allenamide **3a** (0.2 mmol, 1 equiv), TMSCN (0.6 mmol, 3 equiv) and  $\text{Cs}_2\text{CO}_3$  (0.6 mmol, 3 equiv) were dissolved in DMF (2 mL) under a nitrogen atmosphere. The reaction mixture was stirred at 80 °C for 10 h. Upon completion of the reaction as monitored by TLC, the reaction was quenched with water (5 mL). The aqueous layer was extracted with ethyl acetate and the combined organic layers were washed with brine (10 mL\*3), water (10 mL\*3), dried over  $\text{MgSO}_4$  and filtered. Then the solution was concentrated under reduced pressure. The crude material was purified by neutral alumina flash chromatography to yield the product **2a** in 82% yield.

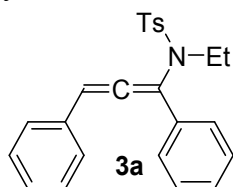

Compound **3a** was obtained as colorless oil ( $R_f = 0.64$  (petroleum ether/ ethyl acetate = 5:1)).  $^1\text{H NMR}$  (400 MHz,  $\text{CDCl}_3$ )  $\delta$  7.67 (d,  $J = 8.2$  Hz, 2H), 7.62 (d,  $J = 7.4$  Hz, 2H), 7.38 – 7.25 (m, 6H), 7.20 – 7.07 (m, 4H), 6.47 (s, 1H), 3.57 – 3.33 (m, 2H), 2.34 (s, 3H), 1.20 (t,  $J = 7.1$  Hz, 3H).  $^{13}\text{C NMR}$  (100 MHz,  $\text{CDCl}_3$ )  $\delta$  206.66, 143.39, 135.04, 134.91, 132.22, 129.34, 128.84, 128.51, 128.35, 128.21, 127.93, 127.64, 126.15, 115.34, 103.72, 46.05, 21.53, 13.74. HRMS (ESI) calcd for  $[\text{C}_{24}\text{H}_{23}\text{NNaO}_2\text{S}]$  ( $[\text{M}+\text{Na}]^+$ ): 412.1342, found: 412.1342. IR (thin film)  $\nu$  1910.63, 2827.17, 2924.17, 2976.03, 3027.14, 3057.01, 3081.99  $\text{cm}^{-1}$ .

## Synthesis of tetrasubstituted allenamides

Tetrasubstituted allenamides **4a-4k** were prepared according to our previous work.<sup>1</sup> And **4l** was prepared as following procedure.

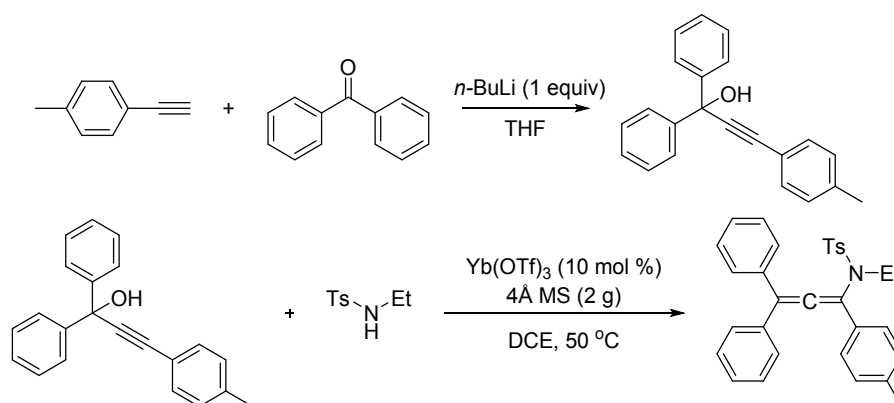

To a 50 mL round bottomed flask was charged with 1-ethynyl-4-methylbenzene (5 mmol, 1 equiv) and 10 mL of THF. The solution was cooled to -78 °C and *n*-BuLi (2.5 M in THF, 2 mL, 5 mmol, 1 equiv) was added. The resulting solution was stirred for 20 minutes at room temperature and then cooled to -78 °C again. Benzophenone (5 mmol, 1 equiv) in THF solution was added dropwise. The reaction mixture was then allowed to warm to room temperature and was monitored by TLC for completion. On completion the reaction was quenched with saturated aqueous NH<sub>4</sub>Cl (40 mL). The aqueous layer was extracted with ethyl acetate and the combined organic layers were washed with brine (30 mL), dried over MgSO<sub>4</sub> and filtered. Then the solution was concentrated under reduced pressure. The crude material was purified by flash chromatography to yield the propargyl alcohol.

To a 50 mL round bottomed flask was charged with Yb(OTf)<sub>3</sub> (10 mol %), the resulting propargyl alcohol (1 equiv), *N*-ethyl-4-methylbenzenesulfonamide (1.5 equiv), 4A MS (2 g) and DCE (0.2 M). The solution was heated to 50 °C and stirred for 12 h. On completion the reaction was quenched with saturated aqueous NaHCO<sub>3</sub>. The aqueous layer was extracted with ethyl acetate and the combined organic layers were washed with brine, dried over MgSO<sub>4</sub> and filtered. Then the mixture was concentrated under reduced pressure. The crude material was purified by flash chromatography to yield the corresponding tetrasubstituted allenamide.<sup>2</sup>

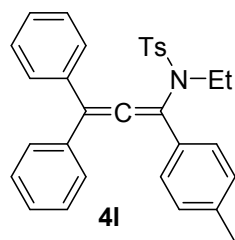

Compound **4I** was obtained as white solid (m.p. = 147-148 °C, Rf = 0.73 (petroleum ether/ ethyl acetate = 3:1)). <sup>1</sup>H NMR (600 MHz, CDCl<sub>3</sub>) δ 7.52 (d, *J* = 8.2 Hz, 4H), 7.35 – 7.25 (m, 6H), 7.19 – 7.10 (m, 6H), 6.91 (d, *J* = 8.0 Hz, 2H), 3.53 (q, *J* = 7.1 Hz, 2H), 2.35 (s, 3H), 2.28 (s, 3H), 1.10 (t, *J* = 7.1 Hz, 3H). <sup>13</sup>C NMR (150 MHz, CDCl<sub>3</sub>) δ 206.37, 143.07, 138.15, 135.60, 135.39, 132.45, 129.38, 129.30, 128.78, 128.52, 128.32, 127.83, 126.15, 119.05, 114.39, 46.14, 21.59, 21.33, 13.91. HRMS (ESI) calcd for [C<sub>31</sub>H<sub>29</sub>NNaO<sub>2</sub>S] ([M+Na]<sup>+</sup>): 502.1811, found: 502.1812. IR (thin film) ν 1911.00, 2872.17, 2977.26, 3082.60 cm<sup>-1</sup>.

## Synthesis of hexasubstituted pyrrolines

**General procedure B:** In a flame-dried Schlenk tube, tetrasubstituted allenamide **4** (0.1 mmol, 1 equiv), TMSCN (0.3 mmol, 3 equiv) and  $K_2CO_3$  (0.3 mmol, 3 equiv) were dissolved in DMF (1 mL) under a nitrogen atmosphere. The reaction mixture was stirred at 80 °C for 10 h. Upon completion of the reaction as monitored by TLC, the reaction was quenched with water (5 mL). The aqueous layer was extracted with ethyl acetate and the combined organic layers were washed with brine (10 mL\*3), water (10 mL\*3), dried over  $MgSO_4$  and filtered. Then the solution was concentrated under reduced pressure. The crude material was purified by silica gel flash chromatography to yield the corresponding hexasubstituted pyrroline.

## Characterization data for hexasubstituted pyrrolines

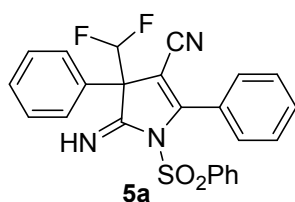

Following the general procedure **B**, **5a** was obtained as a white solid (32.8 mg, 73% yield, m.p. = 128-129 °C, R<sub>f</sub> = 0.53 (petroleum ether/ ethyl acetate = 3:1)). <sup>1</sup>H NMR (400 MHz, CDCl<sub>3</sub>) δ 10.10 (s, 1H), 7.57 – 7.47 (m, 3H), 7.46 – 7.37 (m, 3H), 7.32 – 7.26 (m, 2H), 7.22 (d, *J* = 7.6 Hz, 3H), 7.20 – 7.09 (m, 4H), 6.36 (t, *J* = 54.6 Hz, 1H). <sup>13</sup>C NMR (150 MHz, CDCl<sub>3</sub>) δ 159.35 (d, *J* = 8.2 Hz), 158.32, 136.16, 134.99, 133.79, 132.06, 129.73, 129.41, 129.31, 129.09, 128.43, 127.57, 127.41, 126.49, 116.61 (dd, *J* = 251.4, 247.0 Hz), 114.28, 94.07, 61.08 (t, *J* = 21.6 Hz). <sup>19</sup>F NMR (376 MHz, CDCl<sub>3</sub>) δ -122.87 – -125.82 (m, 2F). HRMS (ESI) calcd for [C<sub>24</sub>H<sub>17</sub>F<sub>2</sub>N<sub>3</sub>NaO<sub>2</sub>S] ([M+Na]<sup>+</sup>): 472.0902, found: 472.0899. IR (thin film) ν 1690.80, 2223.19 cm<sup>-1</sup>.

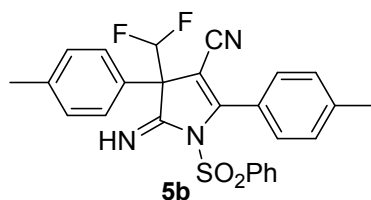

Following the general procedure **B**, **5b** was obtained as a white solid (36.3 mg, 76% yield, m.p. = 137-138 °C, R<sub>f</sub> = 0.35 (petroleum ether/ ethyl acetate = 3:1)). <sup>1</sup>H NMR (600 MHz, CDCl<sub>3</sub>) δ 10.12 (s, 1H), 7.52 – 7.48 (m, 1H), 7.48 – 7.44 (m, 2H), 7.30 (d, *J* = 7.9 Hz, 2H), 7.25 – 7.22 (m, 4H), 7.21 – 7.18 (m, 2H), 7.08 (d, *J* = 8.1 Hz, 2H), 6.38 (t, *J* = 54.7 Hz, 1H), 2.45 (s, 3H), 2.33 (s, 3H). <sup>13</sup>C NMR (150 MHz, CDCl<sub>3</sub>) δ 159.61 (d, *J* = 7.4 Hz), 158.30, 142.65, 138.98, 136.25, 134.72, 130.88, 130.03, 129.67, 129.21, 129.09, 127.48, 126.35, 124.68, 116.55 (dd, *J* = 246.5, 246.5 Hz), 114.50, 93.77, 60.78 (t, *J* = 20.9 Hz), 21.83, 21.15. <sup>19</sup>F NMR (376 MHz, CDCl<sub>3</sub>) δ -122.94 – -125.98 (m, 2F). HRMS (ESI) calcd for [C<sub>26</sub>H<sub>21</sub>F<sub>2</sub>N<sub>3</sub>NaO<sub>2</sub>S] ([M+Na]<sup>+</sup>): 500.1215, found: 500.1210. IR (thin film) ν 1687.51, 2219.73 cm<sup>-1</sup>.

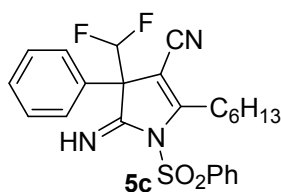

Following the general procedure **B**, **5c** was obtained as a white solid (33.8 mg, 74% yield, m.p. = 73-74 °C, R<sub>f</sub> = 0.44 (petroleum ether/ ethyl acetate = 3:1)). <sup>1</sup>H NMR (600 MHz, CDCl<sub>3</sub>) δ 10.01 (s, 1H), 7.57 – 7.53 (m, 3H), 7.37 – 7.33 (m, 2H), 7.29 – 7.26 (m, 1H), 7.26 – 7.21 (m, 4H), 6.36 (t, *J* = 54.8 Hz, 1H), 3.04 – 2.99 (m, 1H), 2.96 – 2.90 (m, 1H), 1.82 – 1.75 (m, 2H), 1.47 – 1.40 (m, 2H), 1.36 – 1.31 (m, 4H), 0.90 (t, *J* = 7.0 Hz, 3H). <sup>13</sup>C NMR (150 MHz, CDCl<sub>3</sub>) δ 161.50, 159.13 (d, *J* = 8.3 Hz), 136.78, 135.02, 133.82 (d, *J* = 4.2 Hz), 129.72, 129.28, 128.99, 126.82, 126.44, 118.07, 116.42 (dd, *J* = 250.7, 246.4 Hz), 93.02, 60.45 (t, *J* = 21.7 Hz), 31.35, 29.99, 28.69, 22.56, 14.08. <sup>19</sup>F NMR (376 MHz, CDCl<sub>3</sub>) δ -123.35 – -125.93 (m, 2F). HRMS (ESI) calcd for [C<sub>24</sub>H<sub>25</sub>F<sub>2</sub>N<sub>3</sub>NaO<sub>2</sub>S] ([M+Na]<sup>+</sup>): 480.1528, found: 480.1529. IR (thin film) ν 1688.44, 2221.13 cm<sup>-1</sup>.

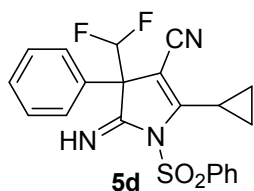

Following the general procedure **B**, **5d** was obtained as a colorless liquid (31.8 mg, 77% yield, R<sub>f</sub> = 0.29 (petroleum ether/ ethyl acetate = 3:1)). <sup>1</sup>H NMR (400 MHz, CDCl<sub>3</sub>) δ 10.03 (s, 1H), 7.72 – 7.62 (m, 3H), 7.46 (t, *J* = 7.8 Hz, 2H), 7.42 – 7.28 (m, 5H), 6.43 (t, *J* = 54.6 Hz, 1H), 2.16 – 2.07 (m, 1H), 1.32 – 1.23 (m, 1H), 1.24 – 1.15 (m, 1H), 1.14 – 0.99 (m, 2H). <sup>13</sup>C NMR (150 MHz, CDCl<sub>3</sub>) δ 160.36, 158.67 (d, *J* = 7.8 Hz), 137.87, 134.98, 133.94, 129.65, 129.35, 129.11, 126.91, 126.61, 116.56 (dd, *J* = 251.1, 245.9 Hz), 114.02, 89.98, 60.89 (t, *J* = 23.8 Hz), 11.08, 9.72, 9.63. <sup>19</sup>F NMR (376 MHz, CDCl<sub>3</sub>) δ -123.95 – -125.87 (m, 2F). HRMS (ESI) calcd for [C<sub>21</sub>H<sub>17</sub>F<sub>2</sub>N<sub>3</sub>NaO<sub>2</sub>S] ([M+Na]<sup>+</sup>): 436.0902, found: 436.0902. IR (thin film) ν 1670.92, 2219.26 cm<sup>-1</sup>.

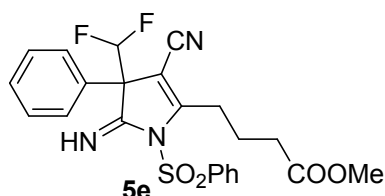

Following the general procedure **B**, **5e** was obtained as a colorless liquid (35.5 mg, 75% yield, R<sub>f</sub> = 0.18 (petroleum ether/ ethyl acetate = 3:1)). <sup>1</sup>H NMR (400 MHz, CDCl<sub>3</sub>) δ 10.04 (s, 1H), 7.62 – 7.53 (m, 3H), 7.41 – 7.34 (m, 2H), 7.33 – 7.18 (m, 5H), 6.36 (t, *J* = 54.7 Hz, 1H), 3.72 (s, 3H), 3.16 – 2.98 (m, 2H), 2.48 (t, *J* = 7.4 Hz, 2H), 2.25 – 2.10 (m, 2H). <sup>13</sup>C NMR (100 MHz, CDCl<sub>3</sub>) δ 172.77, 160.03, 158.84 (d, *J* = 7.4 Hz), 136.54,



135.00, 133.48, 129.66, 129.25, 128.99, 126.77, 126.33, 116.25 (dd,  $J = 251.4$ , 246.6 Hz), 113.63, 93.87, 60.44 (t,  $J = 21.8$  Hz), 51.87, 32.77, 28.97, 23.70.  $^{19}\text{F}$  NMR (376 MHz,  $\text{CDCl}_3$ )  $\delta$  -123.20 – -125.85 (m, 2F). HRMS (ESI) calcd for  $[\text{C}_{23}\text{H}_{21}\text{F}_2\text{NaO}_4\text{S}]$  ( $[\text{M}+\text{Na}]^+$ ): 496.1113, found: 496.1113. IR (thin film)  $\nu$  1687.26, 1734.93, 2221.07  $\text{cm}^{-1}$ .

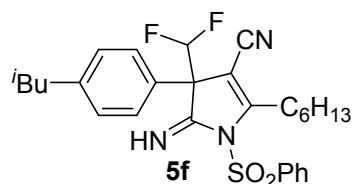

Following the general procedure **B**, **5f** was obtained as a colorless liquid (35.4 mg, 69% yield,  $R_f = 0.52$  (petroleum ether/ ethyl acetate = 3:1)).  $^1\text{H}$  NMR (400 MHz,  $\text{CDCl}_3$ )  $\delta$  10.00 (s, 1H), 7.61 – 7.54 (m, 3H), 7.37 (t,  $J = 7.8$  Hz, 2H), 7.13 (d,  $J = 8.0$  Hz, 2H), 7.03 (d,  $J = 8.0$  Hz, 2H), 6.35 (t,  $J = 54.8$  Hz, 1H), 3.06 – 2.97 (m, 1H), 2.97 – 2.89 (m, 1H), 2.42 (d,  $J = 7.2$  Hz, 2H), 1.86 – 1.76 (m, 3H), 1.49 – 1.40 (m, 2H), 1.38 – 1.31 (m, 4H), 0.93 – 0.87 (m, 9H).  $^{13}\text{C}$  NMR (150 MHz,  $\text{CDCl}_3$ )  $\delta$  161.26, 159.26 (d,  $J = 8.5$  Hz), 142.71, 136.92, 134.92, 131.02, 129.95, 129.69, 126.88, 126.13, 116.44 (dd,  $J = 251.2$ , 246.6 Hz), 114.19, 93.20, 60.27 (t,  $J = 21.7$  Hz), 44.95, 31.35, 30.17, 29.98, 28.71, 22.57, 22.44, 22.44, 14.07.  $^{19}\text{F}$  NMR (376 MHz,  $\text{CDCl}_3$ )  $\delta$  -123.34 – -125.98 (m, 2F). HRMS (DART) calcd for  $[\text{C}_{28}\text{H}_{34}\text{O}_2\text{N}_3\text{F}_2\text{S}]^+$  ( $[\text{M}+\text{H}]^+$ ): 514.2334, found: 514.2325. IR (thin film)  $\nu$  1689.73, 2222.35  $\text{cm}^{-1}$ .

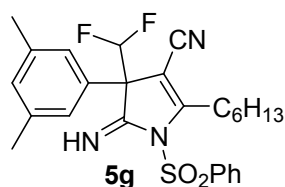

Following the general procedure **B**, **5g** was obtained as a colorless liquid (32.5 mg, 67% yield,  $R_f = 0.32$  (petroleum ether/ ethyl acetate = 3:1)).  $^1\text{H}$  NMR (400 MHz,  $\text{CDCl}_3$ )  $\delta$  9.98 (s, 1H), 7.61 – 7.54 (m, 3H), 7.37 (t,  $J = 7.9$  Hz, 2H), 6.92 (s, 1H), 6.77 (s, 2H), 6.37 (t,  $J = 54.8$  Hz, 1H), 3.07 – 2.88 (m, 2H), 2.22 (s, 6H), 1.87 – 1.74 (m, 2H), 1.51 – 1.40 (m, 2H), 1.39 – 1.32 (m, 4H), 0.91 (t,  $J = 6.8$  Hz, 3H).  $^{13}\text{C}$  NMR (100 MHz,  $\text{CDCl}_3$ )  $\delta$  161.05, 159.31 (d,  $J = 8.0$  Hz), 138.74, 136.70, 134.81, 133.64, 130.69, 129.48, 126.81, 123.99, 116.31 (dd,  $J = 250.4$ , 246.4 Hz), 114.05, 93.40, 60.36 (t,  $J = 21.6$  Hz), 31.31, 29.95, 28.60, 28.58, 22.53, 21.48, 14.03.  $^{19}\text{F}$  NMR (376 MHz,  $\text{CDCl}_3$ )  $\delta$  -123.66, – -125.76 (m, 2F). HRMS (ESI) calcd for  $[\text{C}_{26}\text{H}_{29}\text{F}_2\text{N}_3\text{NaO}_2\text{S}]$  ( $[\text{M}+\text{Na}]^+$ ): 508.1841, found: 508.1843. IR (thin film)  $\nu$  1623.75, 1687.50, 2212.23  $\text{cm}^{-1}$ .

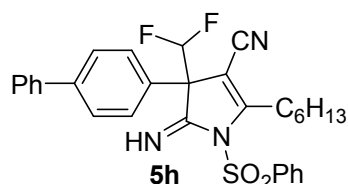

Following the general procedure **B**, **5h** was obtained as a white solid (38.9 mg, 73% yield, m.p. = 95-96 °C, Rf = 0.32 (petroleum ether/ ethyl acetate = 3:1)). <sup>1</sup>H NMR (400 MHz, CDCl<sub>3</sub>) δ 10.05 (s, 1H), 7.58 (d, *J* = 8.0 Hz, 2H), 7.53 (d, *J* = 7.6 Hz, 3H), 7.50 – 7.42 (m, 4H), 7.41 – 7.26 (m, 5H), 6.40 (t, *J* = 54.7 Hz, 1H), 3.09 – 2.93 (m, 2H), 1.87 – 1.77 (m, 2H), 1.51 – 1.40 (m, 2H), 1.41 – 1.30 (m, 4H), 0.91 (t, *J* = 6.7 Hz, 3H). <sup>13</sup>C NMR (100 MHz, CDCl<sub>3</sub>) δ 161.52, 159.14 (d, *J* = 7.9 Hz), 141.83, 139.90, 136.70, 134.87, 132.59, 129.65, 128.99, 127.91, 127.85, 127.06, 126.82, 116.29 (dd, *J* = 247.9, 248.3 Hz), 113.84, 92.99, 60.23 (t, *J* = 21.8 Hz), 31.30, 30.00, 28.65, 22.53, 14.05. <sup>19</sup>F NMR (376 MHz, CDCl<sub>3</sub>) δ -123.19 – -125.83(m, 2F). HRMS (ESI) calcd for [C<sub>30</sub>H<sub>29</sub>F<sub>2</sub>N<sub>3</sub>NaO<sub>2</sub>S] ([M+Na]<sup>+</sup>): 556.1841, found: 556.1832. IR (thin film) ν 1621.19, 1688.47, 2220.92 cm<sup>-1</sup>.

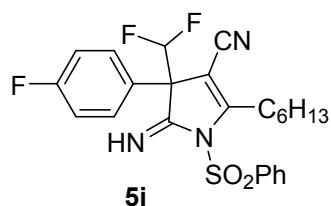

Following the general procedure **B**, **5i** was obtained as a colorless liquid (39.4 mg, 83% yield, m.p. = 60-61 °C, Rf = 0.42 (petroleum ether/ ethyl acetate = 3:1)). <sup>1</sup>H NMR (400 MHz, CDCl<sub>3</sub>) δ 10.03 (s, 1H), 7.57 (d, *J* = 8.3 Hz, 3H), 7.38 (t, *J* = 7.8 Hz, 2H), 7.28 – 7.21 (m, 2H), 6.94 (t, *J* = 8.5 Hz, 2H), 6.31 (t, *J* = 54.7 Hz, 1H), 3.08 – 2.99 (m, 1H), 2.98 – 2.89 (m 1H), 1.84 – 1.74 (m, 2H), 1.49 – 1.39 (m, 2H), 1.38 – 1.30 (m, 4H), 0.90 (t, *J* = 6.9 Hz, 3H). <sup>13</sup>C NMR (100 MHz, CDCl<sub>3</sub>) δ 162.77 (d, *J* = 249.6 Hz), 161.70, 158.90 (d, *J* = 8.2 Hz), 136.58, 134.99, 129.67, 129.53, 128.39 (d, *J* = 8.4 Hz), 126.74, 116.15 (d, *J* = 21.7 Hz), 116.19 (t, *J* = 249.0 Hz), 113.96, 92.66, 59.75 (t, *J* = 21.9 Hz), 31.25, 29.94, 28.60, 28.58, 22.48, 14.00. <sup>19</sup>F NMR (376 MHz, CDCl<sub>3</sub>) δ -112.18 (s, 1F), -121.45 – -126.16 (m, 2F). HRMS (ESI) calcd for [C<sub>24</sub>H<sub>24</sub>F<sub>3</sub>N<sub>3</sub>NaO<sub>2</sub>S] ([M+Na]<sup>+</sup>): 498.1434, found: 498.1434. IR (thin film) ν 1621.49, 1688.86, 2221.47 cm<sup>-1</sup>.

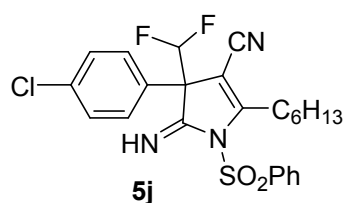

Following the general procedure **B**, **5j** was obtained as a colorless liquid (30.4 mg, 62% yield, m.p. = 63-64 °C, Rf = 0.45 (petroleum ether/ ethyl acetate = 3:1)). <sup>1</sup>H NMR (400 MHz, CDCl<sub>3</sub>) δ 9.96 (s, 1H), 7.55 (t, *J* = 7.5 Hz, 1H), 7.50 (d, *J* = 7.8 Hz, 2H), 7.33 (t, *J* = 7.8 Hz, 2H), 7.21 – 7.09 (m, 4H), 6.22 (t, *J* = 54.7 Hz, 1H), 3.00 – 2.91 (m, 1H), 2.90 – 2.81 (m, 1H), 1.77 – 1.66 (m, 2H), 1.40 – 1.32 (m, 2H), 1.32 – 1.25 (m, 4H), 0.84 (t, *J* = 6.7 Hz, 3H). <sup>13</sup>C NMR (100 MHz, CDCl<sub>3</sub>) δ 161.80, 158.78 (d, *J* = 8.2 Hz), 136.61, 135.23, 134.99, 132.20, 129.69, 129.34, 127.83, 126.76, 116.04 (dd, *J* = 250.7, 247.4 Hz), 113.85, 92.52, 59.84 (t, *J* = 22.0 Hz), 31.26, 29.98, 28.62, 28.60, 22.49, 14.01. <sup>19</sup>F NMR (376 MHz, CDCl<sub>3</sub>) δ -123.03 – -125.93 (m, 2F). HRMS (ESI) calcd for [C<sub>24</sub>H<sub>24</sub>ClF<sub>2</sub>N<sub>3</sub>NaO<sub>2</sub>S] ([M+Na]<sup>+</sup>): 514.1138, found: 514.1139. IR (thin film) ν 1652.87, 1685.26, 2221.18 cm<sup>-1</sup>.

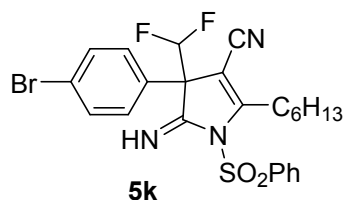

Following the general procedure **B**, **5k** was obtained as a colorless liquid (34.2 mg, 64% yield, m.p. = 85-86 °C, Rf = 0.53 (petroleum ether/ ethyl acetate = 3:1)). <sup>1</sup>H NMR (400 MHz, CDCl<sub>3</sub>) δ 10.03 (s, 1H), 7.63 (t, *J* = 7.5 Hz, 1H), 7.59 – 7.53 (m, 2H), 7.43 – 7.36 (m, 4H), 7.15 – 7.09 (m, 2H), 6.29 (t, *J* = 54.7 Hz, 1H), 3.07 – 2.98 (m, 1H), 2.97 – 2.89 (m, 1H), 1.84 – 1.74 (m, 2H), 1.51 – 1.39 (m, 2H), 1.39 – 1.30 (m, 4H), 0.91 (t, *J* = 6.9 Hz, 3H). <sup>13</sup>C NMR (100 MHz, CDCl<sub>3</sub>) δ 161.83, 158.72 (d, *J* = 8.1 Hz), 136.59, 135.00, 132.73 (d, *J* = 4.3 Hz), 132.30, 129.69, 128.10, 126.75, 123.46, 115.97 (dd, *J* = 251.0, 247.5 Hz), 113.83, 92.46, 59.91 (t, *J* = 22.9 Hz), 31.25, 29.98, 28.60, 22.49, 14.01. <sup>19</sup>F NMR (376 MHz, CDCl<sub>3</sub>) δ -123.02 – -125.92 (m, 2F). HRMS (ESI) calcd for [C<sub>24</sub>H<sub>24</sub>BrF<sub>2</sub>N<sub>3</sub>NaO<sub>2</sub>S] ([M+Na]<sup>+</sup>): 558.0633, found: 558.0624. IR (thin film) ν 1620.44, 1688.56, 2221.17 cm<sup>-1</sup>.

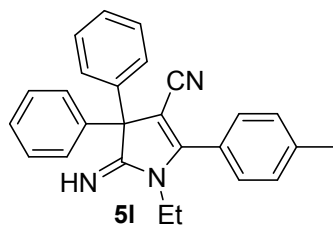

Following the general procedure **B**, **5l** was obtained as a white solid (30.9 mg, 82% yield, m.p. = 155-156 °C, Rf = 0.2 (petroleum ether/ ethyl acetate = 3:1)). <sup>1</sup>H NMR (400 MHz, CDCl<sub>3</sub>) δ 7.47 – 7.37 (m, 6H), 7.37 – 7.26 (m, 8H), 3.70 (q, *J* = 7.0 Hz, 2H), 2.42 (s, 3H), 1.11 (t, *J* = 7.0 Hz, 3H). <sup>13</sup>C NMR (100 MHz, CDCl<sub>3</sub>) δ 172.08, 159.36,

141.34, 140.67, 129.82, 129.16, 128.37, 127.91, 127.88, 125.23, 117.06, 92.38, 64.24, 37.67, 21.55, 13.57. HRMS (DART) calcd for  $[C_{26}H_{24}N_3]^+$  ( $[M+H]^+$ ): 378.1965, found: 378.1963. IR (thin film)  $\nu$  1598.08, 1617.54, 1650.46, 2198.45, 2212.23  $cm^{-1}$ .

# Synthetic applications

## 1) Protection of the amine group

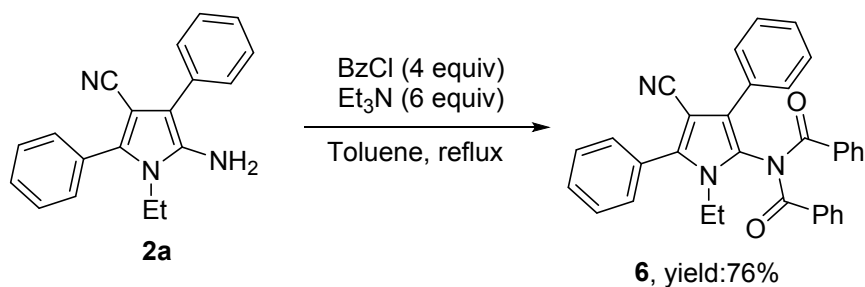

In a flame-dried Schlenk tube was charged with pentasubstituted pyrrole (**2a**, 0.2 mmol), Et<sub>3</sub>N (1.2 mmol), toluene (1 mL) and BzCl (0.8 mmol). The resulting suspension was stirred under reflux for 10 h. Upon completion of the reaction as monitored by TLC, the solvent was concentrated under vacuum. The crude residue was purified by flash column chromatography on silica gel to give product **6** as a white solid in 76% yield.

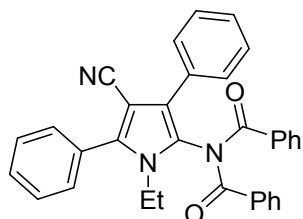

Compound **6** was obtained as white solid (m.p. = 79-80 °C, R<sub>f</sub> = 0.48 (petroleum ether/ethyl acetate = 2:1)). <sup>1</sup>H NMR (600 MHz, CDCl<sub>3</sub>) δ 7.52 – 7.45 (m, 9H), 7.42 (t, *J* = 7.5 Hz, 2H), 7.35 – 7.29 (m, 5H), 7.27 (t, *J* = 7.8 Hz, 4H), 4.00 (q, *J* = 7.2 Hz, 2H), 1.14 (t, *J* = 7.2 Hz, 3H). <sup>13</sup>C NMR (150 MHz, CDCl<sub>3</sub>) δ 173.28, 140.64, 133.85, 132.93, 130.92, 129.75, 129.72, 129.25, 129.16, 129.02, 128.89, 128.85, 128.53, 128.28, 125.27, 124.41, 116.12, 93.03, 39.94, 15.66. HRMS (DART) calcd for [C<sub>33</sub>H<sub>25</sub>O<sub>2</sub>N<sub>3</sub>]<sup>+</sup> ([M+H]<sup>+</sup>): 495.1941, found: 495.1938. IR (thin film) ν 1698.71, 2220.56.23 cm<sup>-1</sup>.

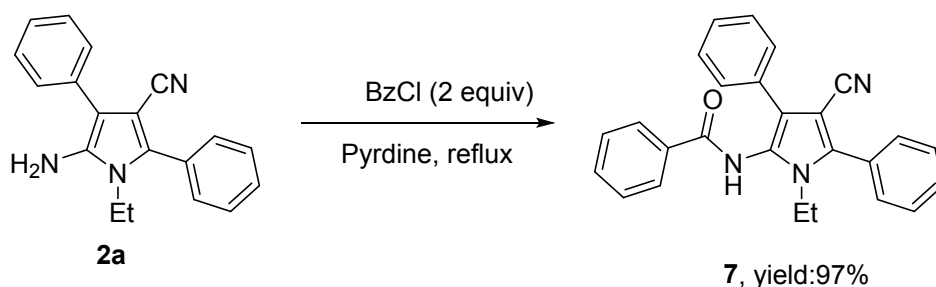

In a flame-dried Schlenk tube was charged with pentasubstituted pyrrole (**2a**, 0.2 mmol), pyridine (1 mL) and BzCl (0.4 mmol). The resulting suspension was stirred under reflux for 1 h. Upon completion of the reaction as monitored by TLC, the solvent was concentrated under vacuum. The crude residue was purified by flash column chromatography on silica gel to give product **7** as a white solid in 97% yield.

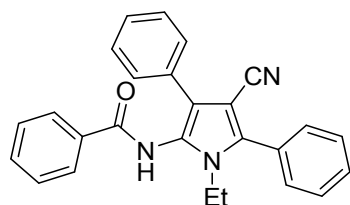

Compound **7** was obtained as white solid (m.p. = 186-187 °C, R<sub>f</sub> = 0.32 (petroleum ether/ ethyl acetate = 2:1)). <sup>1</sup>H NMR (600 MHz, CDCl<sub>3</sub>) δ 7.86 – 7.81 (m, 2H), 7.79 (s, 1H), 7.57 (t, *J* = 7.5 Hz, 1H), 7.52 – 7.40 (m, 9H), 7.33 (t, *J* = 7.6 Hz, 2H), 7.26 (t, *J* = 7.4 Hz, 1H), 3.89 (q, *J* = 7.2 Hz, 2H), 1.15 (t, *J* = 7.2 Hz, 3H). <sup>13</sup>C NMR (150 MHz, CDCl<sub>3</sub>) δ 168.79, 140.07, 132.82, 131.68, 129.77, 129.49, 129.44, 129.08, 129.05, 128.92, 128.34, 127.62, 127.59, 122.92, 122.13, 116.88, 91.65, 39.91, 16.26. HRMS (DART) calcd for [C<sub>26</sub>H<sub>22</sub>ON<sub>3</sub>]<sup>+</sup> ([M+H]<sup>+</sup>): 392.1757, found: 392.1757. IR (thin film) ν 1657.70, 2218.22 cm<sup>-1</sup>.

## 2) Synthesis of lactams

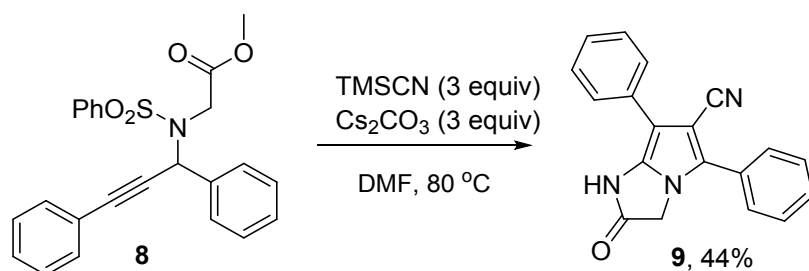

In a flame-dried Schlenk tube, propargyl sulfonamide **8** (0.2 mmol, 1 equiv), TMSCN (0.6 mmol, 3 equiv) and Cs<sub>2</sub>CO<sub>3</sub> (0.6 mmol, 3 equiv) were dissolved in DMF (2 mL) under a nitrogen atmosphere. The reaction mixture was stirred at 80 °C for 10 h. Upon completion of the reaction as monitored by TLC, the reaction was quenched with water (5 mL). The aqueous layer was extracted with ethyl acetate and the combined organic layers were washed with brine (10 mL\*3), water (10 mL\*3), dried over MgSO<sub>4</sub> and filtered. Then the solution was concentrated under reduced pressure. The crude material was purified by silica gel flash chromatography to yield the product **9** as a white solid in 44% yield.

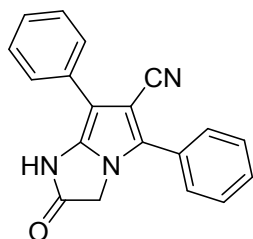

Compound **9** was obtained as white solid (m.p. = 100-101 °C, R<sub>f</sub> = 0.79 (petroleum ether/ ethyl acetate = 2:1)). <sup>1</sup>H NMR (400 MHz, DMSO-*d*<sub>6</sub>) δ 11.66 (s, 1H), 7.67 (d, *J* = 7.8 Hz, 2H), 7.47 (t, *J* = 7.4 Hz, 4H), 7.37 (t, *J* = 7.6 Hz, 3H), 7.21 (t, *J* = 7.3 Hz, 1H), 4.80 (s, 2H). <sup>13</sup>C NMR (100 MHz, DMSO-*d*<sub>6</sub>) δ 173.07, 135.17, 134.74, 131.64, 129.68, 129.30, 129.24, 129.10, 127.28, 127.02, 126.89, 118.24, 102.67, 89.00, 50.10. HRMS (ESI) calcd for [C<sub>19</sub>H<sub>13</sub>N<sub>3</sub>NaO] ([M+Na]<sup>+</sup>): 322.0951, found: 322.0951. IR (thin film) ν 1673.73, 2218.03 cm<sup>-1</sup>.

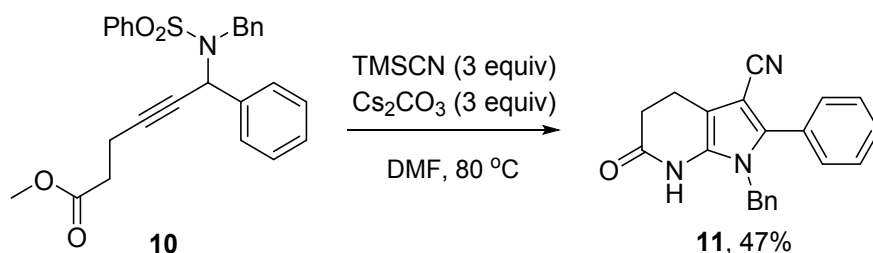

In a flame-dried Schlenk tube, propargyl sulfonamide **10** (0.2 mmol, 1 equiv),

TMSCN (0.6 mmol, 3 equiv) and Cs<sub>2</sub>CO<sub>3</sub> (0.6 mmol, 3 equiv) were dissolved in DMF (2 mL) under a nitrogen atmosphere. The reaction mixture was stirred at 80 °C for 10 h. Upon completion of the reaction as monitored by TLC, the reaction was quenched with water (5 mL). The aqueous layer was extracted with ethyl acetate and the combined organic layers were washed with brine (10 mL\*3), water (10 mL\*3), dried over MgSO<sub>4</sub> and filtered. Then the solution was concentrated under reduced pressure. The crude material was purified by silica gel flash chromatography to yield the product **11** in 47% yield.

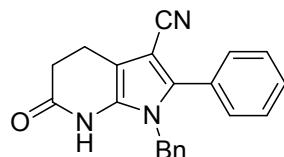

Compound **11** was obtained as white solid (m.p. = 189-190 °C, R<sub>f</sub> = 0.23 (petroleum ether/ ethyl acetate = 2:1)). <sup>1</sup>H NMR (600 MHz, CDCl<sub>3</sub>) δ 9.19 (s, 1H), 7.42 – 7.36 (m, 3H), 7.36 – 7.33 (m, 2H), 7.32 – 7.25 (m, 3H), 6.92 (d, *J* = 6.6 Hz, 2H), 5.10 (s, 2H), 2.84 (t, *J* = 7.7 Hz, 2H), 2.61 (t, *J* = 7.7 Hz, 2H). <sup>13</sup>C NMR (150 MHz, CDCl<sub>3</sub>) δ 171.91, 137.17, 135.82, 130.03, 129.38, 129.22, 129.17, 128.86, 128.19, 125.85, 116.40, 102.99, 90.65, 47.33, 31.76, 17.80. HRMS (DART) calcd for [C<sub>21</sub>H<sub>18</sub>ON<sub>3</sub>]<sup>+</sup> ([M+H]<sup>+</sup>): 328.1444, found: 328.1444. IR (thin film) ν 1673.43, 2218.09 cm<sup>-1</sup>.



### 3) Synthesis of atorvastatin analogues

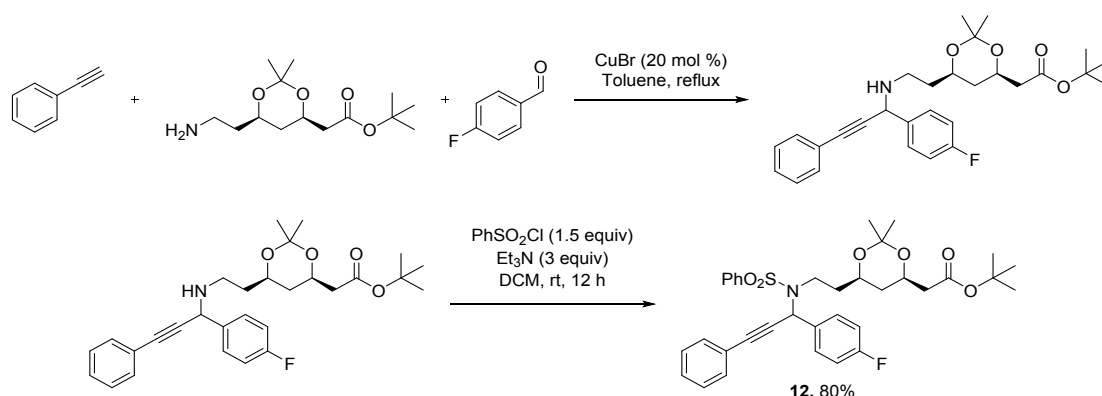

To a 50 mL round bottomed flask was charged with CuBr (1 mmol, 20 mol %), phenylacetylene (5 mmol, 1 equiv), benzaldehyde (7.5 mmol, 1.5 equiv), primary amine (7.5 mmol, 1.5 equiv) and 10 mL of toluene. The solution was heated to reflux and was monitored by TLC for completion. On completion the reaction was quenched with saturated aqueous NaHCO<sub>3</sub>. The aqueous layer was extracted with ethyl acetate and the combined organic layers were washed with brine, dried over MgSO<sub>4</sub> and filtered. Then the solution was concentrated under reduced pressure to afford the crude propargylamide.

The resulting crude propargylamide and Et<sub>3</sub>N (3 equiv) were dissolved in dry DCM, and the mixture was cooled to 0 °C with a cooling bath. To this solution benzenesulfonyl chloride (1.5 equiv) was slowly added in drops, and the mixture was allowed to warm to room temperature and was monitored by TLC for completion. On completion the reaction was quenched with saturated aqueous NaHCO<sub>3</sub>. The aqueous layer was extracted with ethyl acetate and the combined organic layers were washed with brine, dried over MgSO<sub>4</sub> and filtered. Then the solution was concentrated under reduced pressure. The crude material was purified by flash chromatography to yield the desired product **12** in 80% yield.

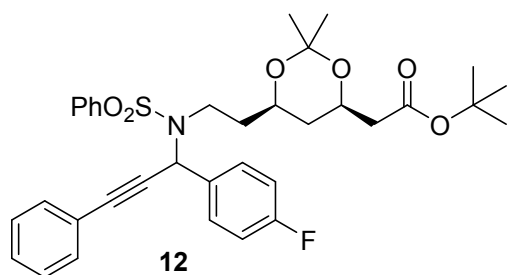

Compound **12** was obtained as colorless liquid (*R*<sub>f</sub> = 0.75 (petroleum ether/ ethyl acetate = 2:1)). <sup>1</sup>H NMR (400 MHz, CDCl<sub>3</sub>) δ 7.96 (d, *J* = 7.5 Hz, 2H), 7.74 – 7.63 (m, 2H), 7.59 – 7.48 (m, 3H), 7.35 – 7.25 (m, 3H), 7.17 (t, *J* = 7.2 Hz, 2H), 7.08 (t, *J* = 8.4 Hz, 2H), 6.27 (s, 1H), 4.21 – 4.02 (m, 1H), 3.78 – 3.47 (m, 1H), 3.42 – 3.29 (m, 1H),

3.29 – 3.02 (m, 1H), 2.41 – 2.14 (m, 2H), 1.82 – 1.57 (m, 1H), 1.50 – 1.35 (m, 12H), 1.29 – 1.26 (m, 3H), 1.22 – 0.90 (m, 3H). <sup>13</sup>C NMR (100 MHz, CDCl<sub>3</sub>) δ 170.22, 170.17, 162.73 (d, *J* = 247.9 Hz), 138.80, 138.73, 132.92 (d, *J* = 3.1 Hz), 132.77 (d, *J* = 3.9 Hz), 131.59, 129.92 (d, *J* = 8.3 Hz), 128.98, 128.88, 128.32, 128.31, 127.81, 127.78, 121.72, 115.48 (d, *J* = 21.8 Hz), 115.46 (d, *J* = 21.6 Hz), 98.69, 98.52, 88.96, 88.80, 82.89, 82.73, 80.58, 80.55, 66.60, 66.10, 66.08, 66.03, 53.70, 53.63, 42.68, 42.66, 41.94, 36.33, 36.31, 36.00, 35.86, 30.01, 29.96, 28.08, 19.67, 19.63. <sup>19</sup>F NMR (376 MHz, CDCl<sub>3</sub>) δ -113.36 (s, 1F), -113.53 (s, 1F). HRMS (DART) calcd for [C<sub>35</sub>H<sub>41</sub>O<sub>6</sub>NFS]<sup>+</sup> ([M+H]<sup>+</sup>): 622.2633, found: 622.2632. [α]<sub>D</sub><sup>26.6</sup> 28.65 (*c* 0.44, CHCl<sub>3</sub>).

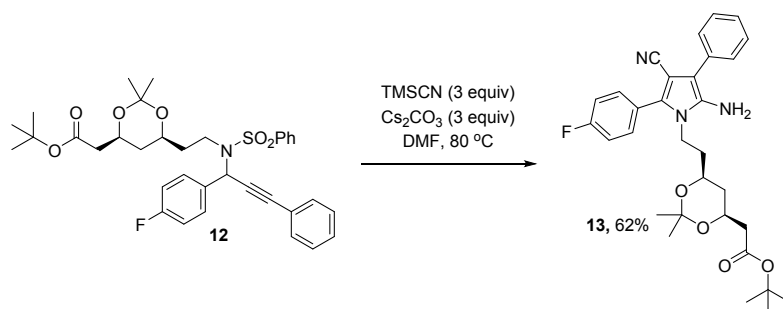

In a flame-dried Schlenk tube, propargyl sulfonamide **12** (0.2 mmol, 1 equiv), TMSCN (0.6 mmol, 3 equiv) and Cs<sub>2</sub>CO<sub>3</sub> (0.6 mmol, 3 equiv) were dissolved in DMF (2 mL) under a nitrogen atmosphere. The reaction mixture was stirred at 80 °C for 10 h. Upon completion of the reaction as monitored by TLC, the reaction was quenched with water (5 mL). The aqueous layer was extracted with ethyl acetate and the combined organic layers were washed with brine (10 mL\*3), water (10 mL\*3), dried over MgSO<sub>4</sub> and filtered. Then the solution was concentrated under reduced pressure. The crude material was purified by neutral alumina flash chromatography to yield the product **13** as a brown liquid in 62% yield.

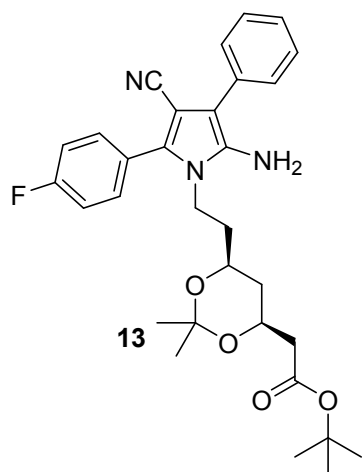

Compound **13** was obtained as brown liquid (*R*<sub>f</sub> = 0.43 (petroleum ether/ ethyl acetate = 2:1)). <sup>1</sup>H NMR (400 MHz, CDCl<sub>3</sub>) δ 7.56 – 7.39 (m, 6H), 7.27 (t, *J* = 7.2 Hz, 1H), 7.17 (t, *J* = 8.5 Hz, 2H), 4.27 – 4.12 (m, 1H), 3.98 (t, *J* = 6.6 Hz, 2H), 3.84 (s, 2H), 3.73

(t,  $J = 10.1$  Hz, 1H), 2.39 (dd,  $J = 15.3, 7.0$  Hz, 1H), 2.25 (dd,  $J = 15.3, 6.1$  Hz, 1H), 1.71 – 1.62 (m, 2H), 1.43 (s, 9H), 1.37 (s, 3H), 1.34 (s, 3H), 1.23 – 1.05 (m, 2H).  $^{13}\text{C}$  NMR (100 MHz,  $\text{CDCl}_3$ )  $\delta$  170.04, 162.89 (d,  $J = 249.4$  Hz), 134.74, 134.26, 133.09, 131.45 (d,  $J = 8.2$  Hz), 129.10, 127.86, 126.39, 125.99 (d,  $J = 3.5$  Hz), 117.46, 116.09 (d,  $J = 21.8$  Hz), 107.76, 99.00, 90.98, 80.81, 65.95, 65.90, 42.41, 39.07, 36.67, 36.03, 30.01, 28.09, 19.72.  $^{19}\text{F}$  NMR (376 MHz,  $\text{CDCl}_3$ )  $\delta$  -112.08 (s, 1F). HRMS (DART) calcd for  $[\text{C}_{31}\text{H}_{37}\text{O}_4\text{N}_3\text{F}]^+$  ( $[\text{M}+\text{H}]^+$ ): 534.2763, found: 534.2760. IR (thin film)  $\nu$  1686.42, 1731.14, 2214.02  $\text{cm}^{-1}$ .  $[\alpha]_{\text{D}}^{26.6}$  -8.02 ( $c$  0.69,  $\text{CHCl}_3$ ).

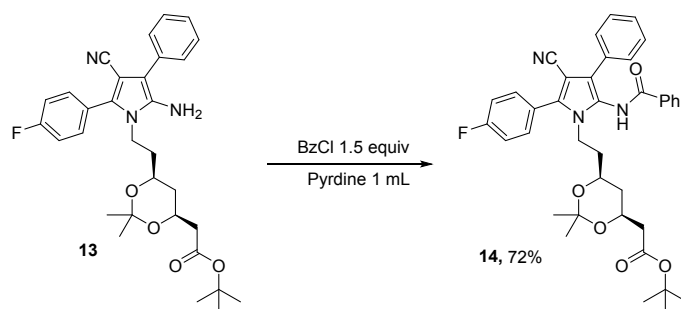

In a flame-dried Schlenk tube was charged with pentasubstituted pyrrole (**13**, 0.2 mmol), pyridine (1 mL) and BzCl (0.3 mmol). The resulting suspension was stirred under reflux for 1 h. Upon completion of the reaction as monitored by TLC, the solvent was concentrated under vacuum. The crude residue was purified by flash column chromatography on silica gel to give the product **14** as a yellow solid in 72% yield.

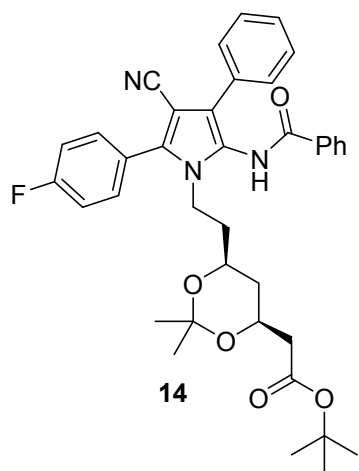

Compound **7** was obtained as yellow solid (m.p. = 68-69 °C,  $R_f = 0.43$  (petroleum ether/ethyl acetate = 2:1)).  $^1\text{H}$  NMR (400 MHz,  $\text{CDCl}_3$ )  $\delta$  7.87 (d,  $J = 7.5$  Hz, 2H), 7.70 (s, 1H), 7.62 – 7.44 (m, 7H), 7.38 (t,  $J = 7.5$  Hz, 2H), 7.30 (d,  $J = 7.3$  Hz, 1H), 7.22 (t,  $J = 8.6$  Hz, 2H), 4.16 – 4.07 (m, 2H), 3.99 – 3.89 (m, 1H), 3.63 – 3.56 (m, 1H), 2.31 (dd,  $J = 15.4, 7.0$  Hz, 1H), 2.18 (dd,  $J = 15.3, 6.1$  Hz, 1H), 1.68 – 1.65 (m, 2H), 1.41 (s, 9H), 1.36 – 1.29 (m, 2H), 1.25 (s, 3H), 1.12 (s, 3H).  $^{13}\text{C}$  NMR (100 MHz,  $\text{CDCl}_3$ )  $\delta$  170.10, 168.65, 163.29 (d,  $J = 250.4$  Hz), 138.87, 132.97, 132.70, 131.65 (d,  $J = 8.5$  Hz),

131.45, 128.97, 128.86, 128.21, 127.62, 127.51, 125.39 (d,  $J = 3.2$  Hz), 122.88, 122.55, 116.31 (d,  $J = 21.8$  Hz), 98.78, 92.10, 80.81, 66.11, 65.86, 42.31, 40.84, 36.76, 35.89, 29.83, 28.07, 19.58.  $^{19}\text{F}$  NMR (376 MHz,  $\text{CDCl}_3$ )  $\delta$  -110.89 (s, 1F). HRMS (DART) calcd for  $[\text{C}_{38}\text{H}_{41}\text{O}_5\text{N}_3\text{F}]^+$  ( $[\text{M}+\text{H}]^+$ ): 638.3025, found: 638.3017. IR (thin film)  $\nu$  1662.18, 1726.90, 2218.74  $\text{cm}^{-1}$ .  $[\alpha]_{\text{D}}^{26.6}$  17.71 ( $c$  0.41,  $\text{CHCl}_3$ ).

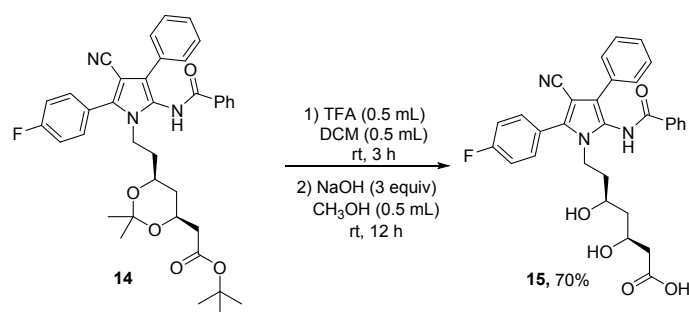

In a flame-dried Schlenk tube was charged with **14** (0.1 mmol), DCM (0.5 mL) and TFA (0.5 mL). The resulting suspension was stirred at room temperature for 3 h. Upon completion of the reaction as monitored by TLC, the solvent was concentrated under vacuum. The crude residue was extracted with ethyl acetate and saturated aqueous  $\text{NaHCO}_3$ . And the combined organic layers were washed with brine (10 mL\*3), water (10 mL\*3), dried over  $\text{MgSO}_4$  and filtered. Then the solution was concentrated under reduced pressure to afford the crude material.

The resulting crude material and NaOH (3 equiv) were dissolved in MeOH (0.5 mL). The resulting suspension was stirred at room temperature for 12 h. Upon completion of the reaction as monitored by TLC, the reaction was quenched with 2 M HCl. The aqueous layer was extracted with ethyl acetate and the combined organic layers were washed with brine, dried over  $\text{MgSO}_4$  and filtered. Then the solution was concentrated under reduced pressure. The crude material was purified by flash chromatography to yield the desired product **15** as a white solid in 70% yield.

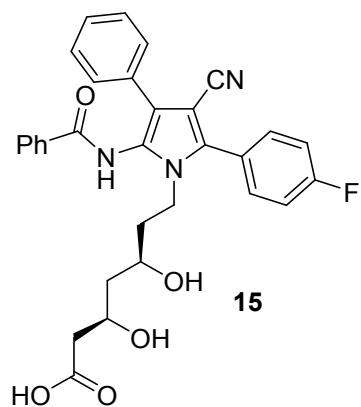

Compound **15** was obtained as white solid (m.p. = 145-146 °C, Rf = 0.38 (DCM/MeOH = 10:1)). <sup>1</sup>H NMR (400 MHz, DMSO-*d*<sub>6</sub>) δ 10.43 (s, 1H), 7.97 (d, *J* = 7.3 Hz, 2H), 7.72 – 7.58 (m, 3H), 7.53 (q, *J* = 7.3 Hz, 4H), 7.43 (q, *J* = 8.5, 8.0 Hz, 4H), 7.30 (t, *J* = 7.4 Hz, 1H), 4.00 (dd, *J* = 17.3, 7.3 Hz, 1H), 3.86 – 3.74 (m, 2H), 2.12 (d, *J* = 4.2 Hz, 1H), 1.99 (dd, *J* = 15.2, 8.1 Hz, 1H), 1.78 – 1.68 (m, 1H), 1.65 – 1.55 (m, 1H), 1.37 (dd, *J* = 15.0, 7.6 Hz, 1H), 1.24 (t, *J* = 8.1 Hz, 2H). <sup>13</sup>C NMR (150 MHz, DMSO-*d*<sub>6</sub>) δ 170.92, 168.69, 163.15 (d, *J* = 247.8 Hz), 138.50, 133.71, 132.74, 132.60 (d, *J* = 8.3 Hz), 132.33, 129.21, 129.17, 128.33, 128.23, 127.79, 125.98, 124.73, 121.82, 117.20, 116.70 (d, *J* = 21.6 Hz), 90.64, 66.40, 44.31, 43.73, 42.08, 38.09. <sup>19</sup>F NMR (376 MHz, DMSO-*d*<sub>6</sub>) δ -111.47 (s, 1F). HRMS (ESI) calcd for [C<sub>31</sub>H<sub>28</sub>N<sub>3</sub>FN<sub>3</sub>O<sub>5</sub>] ([M+Na]<sup>+</sup>): 564.1905, found: 564.1906. IR (thin film) ν 1655.41, 2221.13 cm<sup>-1</sup>. [<sup>α</sup>]<sub>D</sub><sup>26.6</sup> -168.4 (c 0.29, MeOH).

## Preliminary mechanism study

### a) Radical trapping reaction

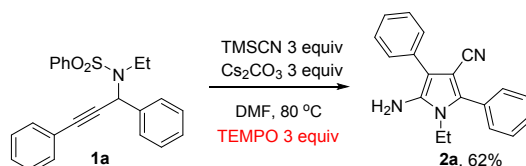

In a flame-dried Schlenk tube, propargyl sulfonamide **1a** (0.2 mmol, 1 equiv), TMSCN (0.6 mmol, 3 equiv) Cs<sub>2</sub>CO<sub>3</sub> (0.6 mmol, 3 equiv) and TEMPO (0.6 mmol, 3 equiv) were dissolved in DMF (2 mL) under a nitrogen atmosphere. The reaction mixture was stirred at 80 °C for 10 h. Upon completion of the reaction as monitored by TLC, the reaction was quenched with water (5 mL). The aqueous layer was extracted with ethyl acetate and the combined organic layers were washed with brine (10 mL\*3), water (10 mL\*3), dried over MgSO<sub>4</sub> and filtered. Then the solution was concentrated under reduced pressure. The crude material was purified by silica gel flash chromatography to yield the product **2a** in 62% yield.

## b) $^1\text{H}$ NMR of crude reaction solution

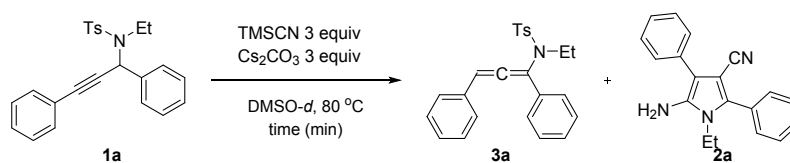

In a flame-dried NMR tube, propargyl sulfonamide **1a** (0.1 mmol, 1 equiv), TMSCN (0.3 mmol, 3 equiv)  $\text{Cs}_2\text{CO}_3$  (0.3 mmol, 3 equiv) and were dissolved in  $\text{DMSO-}d_6$  (0.5 mL) under a nitrogen atmosphere. And the reaction was carried out in NMR machine at  $80\text{ }^\circ\text{C}$  and was monitored in situ after 10, 20, 40 and 60 minutes.

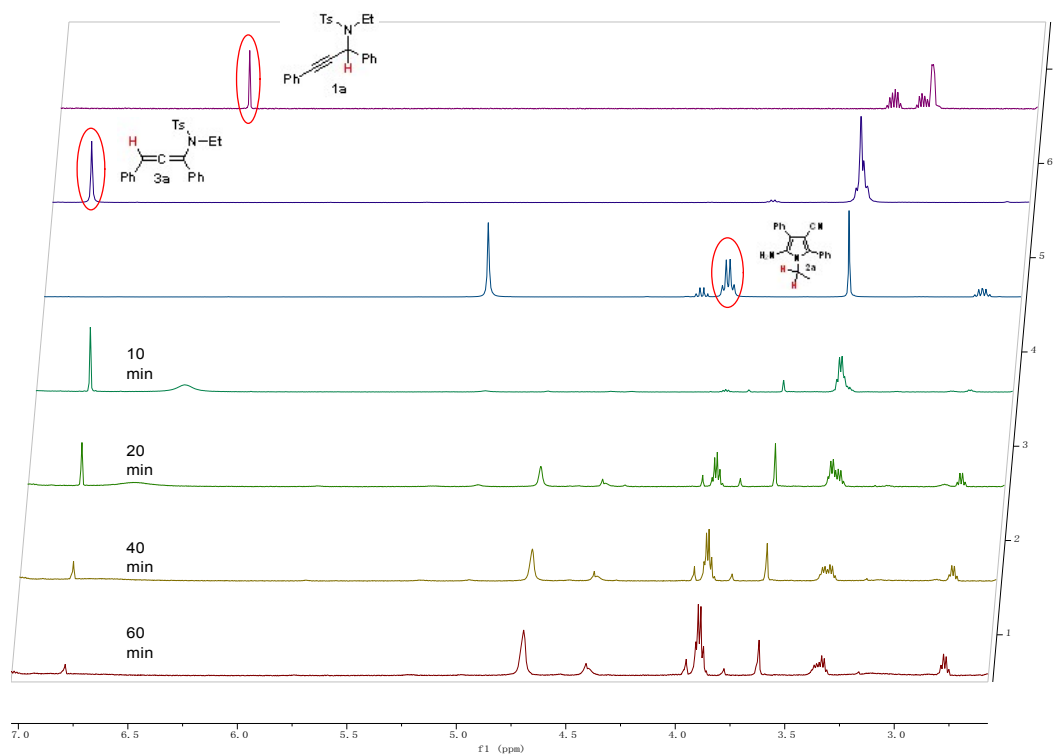

## Single crystal data of 5a

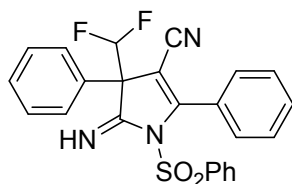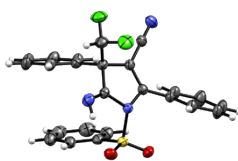

**Table S1 Crystal data and structure refinement for 5a.**

|                                             |                                                                                |
|---------------------------------------------|--------------------------------------------------------------------------------|
| Identification code                         | <b>5a</b>                                                                      |
| Empirical formula                           | C <sub>24</sub> H <sub>17</sub> F <sub>2</sub> N <sub>3</sub> O <sub>2</sub> S |
| Formula weight                              | 449.46                                                                         |
| Temperature/K                               | 292.90(11)                                                                     |
| Crystal system                              | monoclinic                                                                     |
| Space group                                 | C2/c                                                                           |
| a/Å                                         | 27.864(4)                                                                      |
| b/Å                                         | 9.0235(19)                                                                     |
| c/Å                                         | 17.39(2)                                                                       |
| α/°                                         | 90                                                                             |
| β/°                                         | 94.11(4)                                                                       |
| γ/°                                         | 90                                                                             |
| Volume/Å <sup>3</sup>                       | 4362(6)                                                                        |
| Z                                           | 8                                                                              |
| ρ <sub>calc</sub> /cm <sup>3</sup>          | 1.369                                                                          |
| μ/mm <sup>-1</sup>                          | 1.699                                                                          |
| F(000)                                      | 1856.0                                                                         |
| Crystal size/mm <sup>3</sup>                | 0.3 × 0.2 × 0.1                                                                |
| Radiation                                   | CuKα (λ = 1.54184)                                                             |
| 2θ range for data collection/°              | 10.198 to 130.88                                                               |
| Index ranges                                | -27 ≤ h ≤ 32, -10 ≤ k ≤ 6, -20 ≤ l ≤ 19                                        |
| Reflections collected                       | 8983                                                                           |
| Independent reflections                     | 3649 [R <sub>int</sub> = 0.0214, R <sub>sigma</sub> = 0.0249]                  |
| Data/restraints/parameters                  | 3649/0/297                                                                     |
| Goodness-of-fit on F <sup>2</sup>           | 1.047                                                                          |
| Final R indexes [I >= 2σ (I)]               | R <sub>1</sub> = 0.0406, wR <sub>2</sub> = 0.1061                              |
| Final R indexes [all data]                  | R <sub>1</sub> = 0.0499, wR <sub>2</sub> = 0.1155                              |
| Largest diff. peak/hole / e Å <sup>-3</sup> | 0.14/-0.30                                                                     |



## Single crystal data of 7

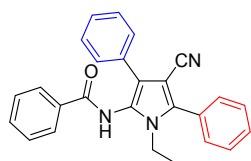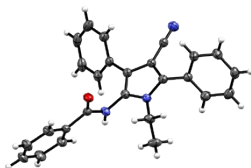

**Table S2 Crystal data and structure refinement for 7.**

|                                             |                                                               |
|---------------------------------------------|---------------------------------------------------------------|
| Identification code                         | 7                                                             |
| Empirical formula                           | C <sub>26</sub> H <sub>21</sub> N <sub>3</sub> O              |
| Formula weight                              | 391.46                                                        |
| Temperature/K                               | 110.43(10)                                                    |
| Crystal system                              | monoclinic                                                    |
| Space group                                 | C2/c                                                          |
| a/Å                                         | 24.8324(4)                                                    |
| b/Å                                         | 9.05410(10)                                                   |
| c/Å                                         | 21.9042(4)                                                    |
| α/°                                         | 90                                                            |
| β/°                                         | 109.819(2)                                                    |
| γ/°                                         | 90                                                            |
| Volume/Å <sup>3</sup>                       | 4633.12(14)                                                   |
| Z                                           | 8                                                             |
| ρ <sub>calc</sub> /cm <sup>3</sup>          | 1.122                                                         |
| μ/mm <sup>-1</sup>                          | 0.351                                                         |
| F(000)                                      | 1648.0                                                        |
| Crystal size/mm <sup>3</sup>                | 0.9 × 0.7 × 0.5                                               |
| Radiation                                   | GaKα (λ = 1.3405)                                             |
| 2θ range for data collection/°              | 9.108 to 120.92                                               |
| Index ranges                                | -31 ≤ h ≤ 31, -8 ≤ k ≤ 11, -28 ≤ l ≤ 27                       |
| Reflections collected                       | 28636                                                         |
| Independent reflections                     | 5187 [R <sub>int</sub> = 0.0193, R <sub>sigma</sub> = 0.0123] |
| Data/restraints/parameters                  | 5187/0/272                                                    |
| Goodness-of-fit on F <sup>2</sup>           | 1.040                                                         |
| Final R indexes [I ≥ 2σ (I)]                | R <sub>1</sub> = 0.0362, wR <sub>2</sub> = 0.0944             |
| Final R indexes [all data]                  | R <sub>1</sub> = 0.0376, wR <sub>2</sub> = 0.0953             |
| Largest diff. peak/hole / e Å <sup>-3</sup> | 0.28/-0.20                                                    |

## Computational methods and details

All of structures were optimized at B3LYP<sup>3</sup>-D3<sup>4</sup>/Def2-SVP<sup>5</sup> level of theory in gas-phase to analyze the frequencies and thermal energies at 353K. Single point energies based upon the optimized structures were then calculated at the B3LYP-D3/Def2-TZVP level of theory with SMD solvation model<sup>6</sup> calculation in N,N-dimethylformamide (DMF) solution. The presented Gibbs free energies are obtained by adding the solution-phase electronic energy with the gas-phase Gibbs free energy correction. In addition, natural bond orbital (NBO) charge analysis<sup>7</sup> was calculated at the same level in solution-phase. The intrinsic reaction coordinate (IRC) path calculations have also been conducted to confirm the connections of cyanation from TSs to intermediates. The integration grid option were required at ultrafine for all of calculations. All calculations were carried out by the Gaussian 09 package.<sup>8</sup>

For the cynao nucleophilic addition, we calculated two conformations of **3b** with different C-N(Me)(SO<sub>2</sub>Ph) orientations. Figure S1 depicts the other pathways of cyanation in which the cyanide anion adds onto the internal and terminal carbons of **3b<sub>rot</sub>**. The tendency of cyanide addition onto **3b<sub>rot</sub>** is similar to addition onto **3b** where the preference site is still the internal carbon. Similarly, the NBO charges on the carbons of the allene moieties in **3b<sub>rot</sub>** are 0.13 and -0.27 for internal and terminal carbons, respectively. It is worth noting that the relative free energy of **3b<sub>rot</sub>** is -3.7 kcal/mol lower than that of **3b**, but the barrier of **TS1<sub>rot</sub>** is 2.9 kcal/mol higher than that of **TS1**. This means that the path of cynao nucleophilic addition possibly should be **3b<sub>rot</sub>-3b-TS1-int1-int1<sub>rot</sub>**.

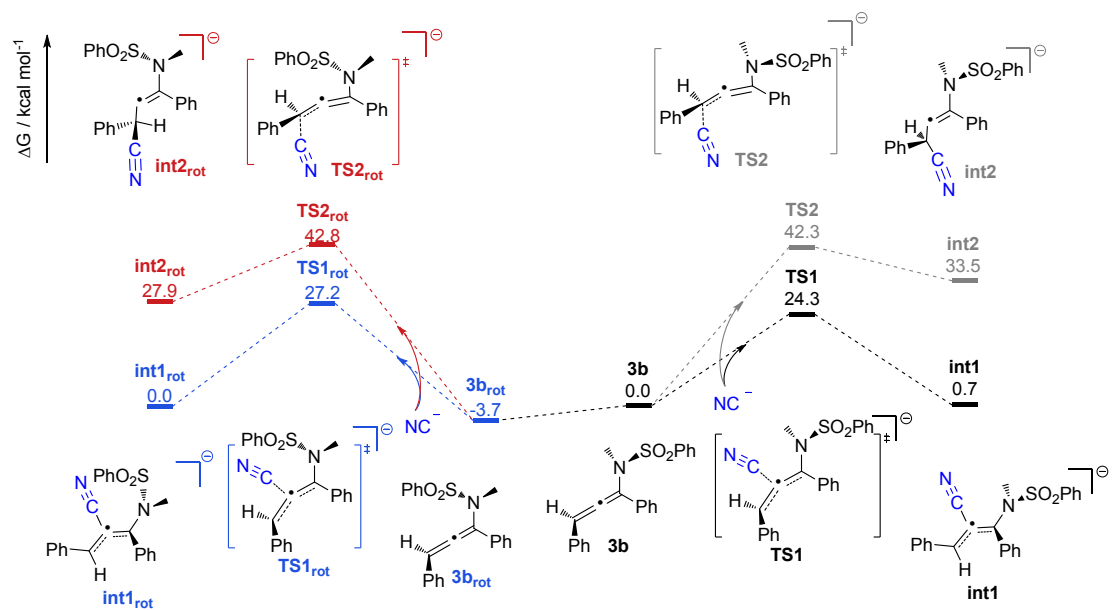

Figure S1. Energy profile of cyano nucleophilic addition on  $3b_{rot}$ .

**Table S3.** Electronic potential energies and correction to zero point energies, thermal energies, enthalpies, free energies (in Hartree) and imaginary frequencies ( $\text{cm}^{-1}$ ) of optimized structures calculated at the B3LYP-D3/Def2-TZVP/(SMD-DMF)//B3LYP-D3/Def2-SVP.

| Entry | Structure                 | $E_{\text{el,sol}}$ | $E_{\text{el,gas}}$ | $c\text{ZPE}_{\text{gas}}$ | $c\text{U}_{298,\text{gas}}$ | $c\text{H}_{298,\text{gas}}$ | $c\text{G}_{298,\text{gas}}$ | Imaginary Frequency |
|-------|---------------------------|---------------------|---------------------|----------------------------|------------------------------|------------------------------|------------------------------|---------------------|
| 1     | <b>3b</b>                 | -1453.593562        | -1452.225456        | 0.355749                   | 0.386686                     | 0.387804                     | 0.286481                     |                     |
| 2     | <b>4a</b>                 | -2432.034066        | -2429.801818        | 0.432580                   | 0.476165                     | 0.477284                     | 0.346261                     |                     |
| 3     | $\text{CN}^-$             | -92.998838          | -92.763823          | 0.004942                   | 0.007740                     | 0.008858                     | -0.018278                    |                     |
| 4     | <b>TS1</b>                | -1546.569519        | -1545.002565        | 0.360230                   | 0.394883                     | 0.396002                     | 0.284072                     | -165.0093           |
| 5     | <b>int1</b>               | -1546.614548        | -1545.082624        | 0.363713                   | 0.397410                     | 0.398529                     | 0.291358                     |                     |
| 6     | <b>TS2</b>                | -1546.542124        | -1544.994107        | 0.360575                   | 0.394836                     | 0.395954                     | 0.285244                     | -339.5953           |
| 7     | <b>int2</b>               | -1546.561623        | -1545.015106        | 0.362757                   | 0.396463                     | 0.397582                     | 0.290727                     |                     |
| 8     | <b>3b<sub>rot</sub></b>   | -1453.597893        | -1452.224831        | 0.355781                   | 0.386753                     | 0.387872                     | 0.284880                     |                     |
| 9     | <b>TS1<sub>rot</sub></b>  | -1546.567503        | -1545.018789        | 0.360806                   | 0.395198                     | 0.396317                     | 0.286664                     | -216.2856           |
| 10    | <b>int1<sub>rot</sub></b> | -1546.613913        | -1545.086779        | 0.363731                   | 0.397460                     | 0.398579                     | 0.289711                     |                     |
| 11    | <b>TS2<sub>rot</sub></b>  | -1546.540377        | -1544.995730        | 0.360667                   | 0.394886                     | 0.396004                     | 0.284300                     | -376.3601           |
| 12    | <b>int2<sub>rot</sub></b> | -1546.568726        | -1545.025977        | 0.363309                   | 0.396936                     | 0.398054                     | 0.289010                     |                     |

# Coordinate of optimized structures

## Structure S1. 3b<sub>rot</sub>

E(B3LYP)<sub>sol</sub> = -1453.59789306

E(B3LYP)<sub>gas</sub> = -1452.22483148

|    |           |           |           |
|----|-----------|-----------|-----------|
| 7  | -1.118341 | -0.173967 | 1.273376  |
| 16 | -1.944718 | -1.594932 | 0.792919  |
| 6  | -0.734051 | -2.499756 | -0.175708 |
| 6  | -0.676908 | -2.288308 | -1.557142 |
| 6  | 0.178508  | -3.332109 | 0.479589  |
| 6  | 0.331578  | -2.915055 | -2.292699 |
| 1  | -1.418449 | -1.645120 | -2.033240 |
| 6  | 1.183405  | -3.951589 | -0.268222 |
| 1  | 0.085751  | -3.496346 | 1.554483  |
| 6  | 1.263060  | -3.738787 | -1.648978 |
| 1  | 0.387756  | -2.763232 | -3.373435 |
| 1  | 1.902738  | -4.607363 | 0.228104  |
| 1  | 2.050733  | -4.226027 | -2.229187 |
| 8  | -3.012898 | -1.170847 | -0.109088 |
| 8  | -2.208883 | -2.344725 | 2.021437  |
| 6  | 5.289563  | 2.058872  | 0.768680  |
| 6  | 4.052336  | 2.465881  | 1.285579  |
| 6  | 2.869197  | 1.926181  | 0.784898  |
| 6  | 2.899006  | 0.964303  | -0.243807 |
| 6  | 4.145780  | 0.566828  | -0.757737 |
| 6  | 5.331581  | 1.108362  | -0.254967 |
| 1  | 4.012377  | 3.212536  | 2.082893  |
| 1  | 1.904756  | 2.250601  | 1.184287  |
| 1  | 4.182661  | -0.177997 | -1.557750 |
| 1  | 6.292208  | 0.786684  | -0.665370 |
| 6  | 1.664997  | 0.361500  | -0.786394 |
| 6  | 0.442157  | 0.567388  | -0.350021 |
| 6  | -0.757016 | 0.715186  | 0.191617  |
| 1  | 6.215895  | 2.484659  | 1.162260  |

|   |           |           |           |
|---|-----------|-----------|-----------|
| 6 | -1.742050 | 1.749513  | -0.212141 |
| 6 | -2.955634 | 1.892745  | 0.479585  |
| 6 | -1.467360 | 2.616173  | -1.286684 |
| 6 | -3.868583 | 2.882252  | 0.107888  |
| 1 | -3.182629 | 1.213381  | 1.300088  |
| 6 | -2.379976 | 3.603029  | -1.654727 |
| 1 | -0.528081 | 2.509922  | -1.835607 |
| 6 | -3.586652 | 3.741417  | -0.957467 |
| 1 | -4.810551 | 2.977381  | 0.654002  |
| 1 | -2.150887 | 4.267505  | -2.491909 |
| 1 | -4.303825 | 4.513501  | -1.247604 |
| 1 | 1.793863  | -0.336768 | -1.625938 |
| 6 | -0.148404 | -0.332322 | 2.358783  |
| 1 | 0.785790  | -0.825119 | 2.031432  |
| 1 | 0.100028  | 0.668790  | 2.738880  |
| 1 | -0.609211 | -0.915945 | 3.164933  |

## Structure S2. 4a

E(B3LYP)<sub>sol</sub> = -2432.03406623

E(B3LYP)<sub>gas</sub> = -2429.80181839

|    |           |          |           |
|----|-----------|----------|-----------|
| 9  | 4.232993  | 0.225018 | 1.485734  |
| 7  | -0.698204 | 0.561060 | 0.068069  |
| 16 | -0.676042 | 2.075023 | 0.910070  |
| 6  | 0.855984  | 2.826638 | 0.394316  |
| 6  | 2.000128  | 2.595960 | 1.162110  |
| 6  | 0.880260  | 3.582820 | -0.781940 |
| 6  | 3.214336  | 3.129125 | 0.724475  |
| 1  | 1.936745  | 2.002438 | 2.072949  |
| 6  | 2.101203  | 4.116922 | -1.196660 |
| 1  | -0.032928 | 3.724632 | -1.359182 |
| 6  | 3.263369  | 3.887234 | -0.449552 |
| 1  | 4.121398  | 2.935088 | 1.299712  |
| 1  | 2.146252  | 4.710158 | -2.112942 |
| 1  | 4.216270  | 4.301106 | -0.788973 |
| 8  | -0.582998 | 1.713647 | 2.322692  |
| 8  | -1.799644 | 2.850771 | 0.392412  |
| 16 | -1.343108 | 0.400438 | -1.538499 |
| 8  | -1.091283 | 1.655993 | -2.237258 |

|   |           |           |           |                      |                    |                |           |                |
|---|-----------|-----------|-----------|----------------------|--------------------|----------------|-----------|----------------|
| 8 | -0.804146 | -0.870883 | -2.024461 | -----                |                    |                |           |                |
| 6 | -3.101145 | 0.198146  | -1.293877 |                      |                    |                |           |                |
| 6 | -3.609603 | -1.096226 | -1.151085 | <b>Structure S3.</b> | CN <sup>-</sup>    |                |           |                |
| 6 | -3.915473 | 1.332621  | -1.236514 | E(B3LYP)sol          | =                  |                |           | -92.9988381353 |
| 6 | -4.979658 | -1.253691 | -0.934994 | E(B3LYP)gas          | =                  | -92.7638229989 |           |                |
| 1 | -2.940258 | -1.955635 | -1.200246 | -----                |                    |                |           |                |
| 6 | -5.283356 | 1.155193  | -1.019569 | 7                    | 0.000000           | 0.000000       | 0.544137  |                |
| 1 | -3.476257 | 2.324063  | -1.341236 | 6                    | 0.000000           | 0.000000       | -0.634826 |                |
| 6 | -5.812810 | -0.131720 | -0.867679 | -----                |                    |                |           |                |
| 1 | -5.393928 | -2.257007 | -0.813952 |                      |                    |                |           |                |
| 1 | -5.938246 | 2.028037  | -0.967852 | <b>Structure S4.</b> | TS1 <sub>rot</sub> |                |           |                |
| 1 | -6.884399 | -0.260587 | -0.695550 | E(B3LYP)sol          | =                  |                |           | -1546.56750275 |
| 6 | 4.322467  | -3.128055 | -2.636084 | E(B3LYP)gas          | =                  | -1545.01878855 |           |                |
| 6 | 2.967347  | -2.780152 | -2.699272 | -----                |                    |                |           |                |
| 6 | 2.359709  | -2.109220 | -1.640173 | 7                    | -1.748061          | -0.579814      | 0.917673  |                |
| 6 | 3.098689  | -1.774914 | -0.486259 | 6                    | 5.284059           | 2.086674       | 0.172556  |                |
| 6 | 4.464195  | -2.112111 | -0.439583 | 6                    | 4.273036           | 2.355647       | 1.101923  |                |
| 6 | 5.067046  | -2.786470 | -1.505374 | 6                    | 2.960877           | 1.936963       | 0.872278  |                |
| 1 | 2.377797  | -3.026318 | -3.585928 | 6                    | 2.632277           | 1.221309       | -0.298880 |                |
| 1 | 1.308631  | -1.820987 | -1.715233 | 6                    | 3.661893           | 0.961724       | -1.228895 |                |
| 1 | 5.079840  | -1.833870 | 0.416583  | 6                    | 4.970287           | 1.386790       | -0.999042 |                |
| 1 | 6.128926  | -3.039109 | -1.449803 | 1                    | 4.508003           | 2.901231       | 2.020582  |                |
| 6 | 3.267641  | -0.674110 | 1.846114  | 1                    | 2.176167           | 2.135554       | 1.600633  |                |
| 1 | 3.775667  | -1.548045 | 2.291826  | 1                    | 3.422736           | 0.402208       | -2.138362 |                |
| 6 | 2.431016  | -1.075588 | 0.644776  | 1                    | 5.750892           | 1.168063       | -1.734062 |                |
| 6 | 1.138023  | -0.828008 | 0.665780  | 6                    | 1.281851           | 0.746522       | -0.591470 |                |
| 6 | -0.163050 | -0.628213 | 0.676412  | 6                    | 0.214362           | 0.610583       | 0.192744  |                |
| 1 | 4.796354  | -3.653142 | -3.469218 | 6                    | -1.127105          | 0.553693       | 0.304512  |                |
| 6 | -1.147232 | -1.602632 | 1.215535  | 1                    | 6.308889           | 2.421943       | 0.357481  |                |
| 6 | -2.279249 | -1.146524 | 1.910543  | 6                    | -1.998900          | 1.669328       | -0.119084 |                |
| 6 | -0.978547 | -2.979467 | 0.997003  | 6                    | -3.368866          | 1.448919       | -0.376312 |                |
| 6 | -3.224467 | -2.057943 | 2.382689  | 6                    | -1.501474          | 2.981191       | -0.278193 |                |
| 1 | -2.406821 | -0.077162 | 2.083514  | 6                    | -4.200348          | 2.496248       | -0.778016 |                |
| 6 | -1.929256 | -3.887661 | 1.467380  | 1                    | -3.761693          | 0.434876       | -0.296790 |                |
| 1 | -0.110578 | -3.327700 | 0.432131  | 6                    | -2.334567          | 4.022058       | -0.685723 |                |
| 6 | -3.055248 | -3.428963 | 2.160523  | 1                    | -0.446856          | 3.174035       | -0.068884 |                |
| 1 | -4.101330 | -1.693801 | 2.923551  | 6                    | -3.693465          | 3.790406       | -0.936562 |                |
| 1 | -1.796187 | -4.956730 | 1.283093  | 1                    | -5.256941          | 2.294144       | -0.979017 |                |
| 1 | -3.801701 | -4.139812 | 2.524145  | 1                    | -1.921379          | 5.029202       | -0.798294 |                |
| 9 | 2.511366  | -0.094417 | 2.810894  | 1                    | -4.347428          | 4.609194       | -1.250058 |                |

|                                         |                |                |           |       |           |           |           |
|-----------------------------------------|----------------|----------------|-----------|-------|-----------|-----------|-----------|
| 1                                       | 1.123817       | 0.383996       | -1.616815 | 1     | -2.847739 | 2.370421  | 1.624793  |
| 6                                       | -2.319061      | -0.470976      | 2.259012  | 1     | -5.308438 | 2.501710  | 1.654724  |
| 1                                       | -3.159219      | 0.246399       | 2.263167  | 6     | -1.264556 | 1.164792  | -0.101962 |
| 1                                       | -2.688296      | -1.455488      | 2.570989  | 6     | -0.295835 | 0.445432  | -0.802213 |
| 1                                       | -1.531732      | -0.154073      | 2.956414  | 6     | 1.126293  | 0.499992  | -0.606398 |
| 7                                       | 0.910260       | -0.825080      | 3.180603  | 1     | -6.661465 | 1.408272  | -0.155798 |
| 6                                       | 1.044494       | 0.008244       | 2.363052  | 6     | 1.888020  | 1.637613  | -0.124666 |
| 16                                      | -1.960796      | -1.957214      | -0.007904 | 6     | 3.252454  | 1.493929  | 0.261588  |
| 6                                       | -0.285528      | -2.422365      | -0.468263 | 6     | 1.368394  | 2.964667  | -0.084336 |
| 6                                       | 0.062055       | -2.459851      | -1.820294 | 6     | 4.023268  | 2.585172  | 0.655271  |
| 6                                       | 0.640669       | -2.693905      | 0.541253  | 1     | 3.692419  | 0.498019  | 0.281521  |
| 6                                       | 1.378030       | -2.775288      | -2.169735 | 6     | 2.149698  | 4.048717  | 0.307757  |
| 1                                       | -0.693244      | -2.220348      | -2.570187 | 1     | 0.339722  | 3.143923  | -0.397955 |
| 6                                       | 1.954430       | -2.994021      | 0.177764  | 6     | 3.487703  | 3.879319  | 0.689279  |
| 1                                       | 0.371977       | -2.588747      | 1.593159  | 1     | 5.063904  | 2.417287  | 0.952337  |
| 6                                       | 2.323397       | -3.036492      | -1.171230 | 1     | 1.704045  | 5.049290  | 0.310915  |
| 1                                       | 1.669018       | -2.800936      | -3.223633 | 1     | 4.094207  | 4.731948  | 1.007404  |
| 1                                       | 2.697083       | -3.156092      | 0.962062  | 1     | -0.863446 | 1.758147  | 0.722333  |
| 1                                       | 3.358997       | -3.255950      | -1.445842 | 6     | 2.622317  | -0.712544 | -2.228429 |
| 8                                       | -2.659835      | -1.626221      | -1.262895 | 1     | 3.405828  | 0.065949  | -2.219646 |
| 8                                       | -2.522398      | -2.993771      | 0.869847  | 1     | 3.093627  | -1.698140 | -2.343900 |
| -----                                   |                |                |           | 1     | 1.953038  | -0.544275 | -3.087238 |
| Frequencies --                          | -216.2856      |                |           | 7     | -0.964574 | -1.248515 | -2.670948 |
| Red. masses --                          | 8.5020         |                |           | 6     | -0.685084 | -0.505988 | -1.819833 |
| Frc consts --                           | 0.2343         |                |           | 16    | 2.067072  | -1.920984 | 0.127290  |
| IR Inten --                             | 157.1470       |                |           | 6     | 0.417590  | -2.126394 | 0.812063  |
|                                         |                |                |           | 6     | 0.065095  | -1.423520 | 1.966421  |
| <b>Structure S5. int1<sub>rot</sub></b> |                |                |           | 6     | -0.491551 | -2.949640 | 0.145990  |
| E(B3LYP)sol =                           |                | -1546.61391251 |           | 6     | -1.240886 | -1.528862 | 2.446517  |
| E(B3LYP)gas =                           | -1545.08677918 |                |           | 1     | 0.807848  | -0.788081 | 2.450541  |
| -----                                   |                |                |           | 6     | -1.793403 | -3.053640 | 0.641780  |
| 7                                       | 1.836691       | -0.679748      | -1.000056 | 1     | -0.183830 | -3.464379 | -0.764685 |
| 6                                       | -5.569310      | 1.354528       | -0.166293 | 6     | -2.170036 | -2.338619 | 1.782902  |
| 6                                       | -4.891890      | 0.680798       | -1.191529 | 1     | -1.541993 | -0.959914 | 3.329641  |
| 6                                       | -3.500529      | 0.606346       | -1.218488 | 1     | -2.523379 | -3.674719 | 0.116925  |
| 6                                       | -2.704731      | 1.202846       | -0.199422 | 1     | -3.198620 | -2.397839 | 2.147904  |
| 6                                       | -3.419809      | 1.891056       | 0.824214  | 8     | 2.926546  | -1.503540 | 1.251162  |
| 6                                       | -4.809093      | 1.963259       | 0.842328  | 8     | 2.435278  | -3.139204 | -0.617067 |
| 1                                       | -5.461073      | 0.203470       | -1.996042 | ----- |           |           |           |
| 1                                       | -3.021931      | 0.078900       | -2.041384 |       |           |           |           |

|                                        |           |           |           |                                         |           |           |           |
|----------------------------------------|-----------|-----------|-----------|-----------------------------------------|-----------|-----------|-----------|
| <b>Structure S6. TS2<sub>rot</sub></b> |           |           |           | 6                                       | -3.676096 | -3.745441 | 0.353929  |
| E(B3LYP)sol = -1546.54037749           |           |           |           | 1                                       | -4.974657 | -2.712221 | -1.036498 |
| E(B3LYP)gas = -1544.99573027           |           |           |           | 1                                       | -2.155468 | -4.507523 | 1.700441  |
| -----                                  |           |           |           | 1                                       | -4.381273 | -4.560858 | 0.542123  |
| 7                                      | -1.392566 | 0.501690  | -1.318600 | 1                                       | 1.715912  | 0.012807  | 1.525759  |
| 16                                     | -2.091362 | 1.821314  | -0.543772 | 6                                       | -0.549610 | 0.816093  | -2.467702 |
| 6                                      | -0.781323 | 2.565372  | 0.445996  | 1                                       | 0.456532  | 1.157889  | -2.161532 |
| 6                                      | -0.540977 | 2.074967  | 1.733527  | 1                                       | -0.431152 | -0.107105 | -3.055339 |
| 6                                      | 0.026071  | 3.554088  | -0.119675 | 1                                       | -1.041273 | 1.575223  | -3.089676 |
| 6                                      | 0.540844  | 2.577756  | 2.458774  | 7                                       | 1.411075  | -2.996869 | 2.674650  |
| 1                                      | -1.195684 | 1.304779  | 2.142597  | 6                                       | 1.680020  | -2.187646 | 1.874124  |
| 6                                      | 1.106601  | 4.051301  | 0.615466  | -----                                   |           |           |           |
| 1                                      | -0.201598 | 3.921249  | -1.121871 | Frequencies --                          | -376.3601 |           |           |
| 6                                      | 1.367431  | 3.559703  | 1.898523  | Red. masses --                          | 11.6671   |           |           |
| 1                                      | 0.745593  | 2.192802  | 3.461084  | Frc consts --                           | 0.9737    |           |           |
| 1                                      | 1.749007  | 4.823171  | 0.182934  | IR Inten --                             | 514.4017  |           |           |
| 1                                      | 2.219705  | 3.943164  | 2.466246  | <b>Structure S7. int2<sub>rot</sub></b> |           |           |           |
| 8                                      | -3.092879 | 1.306281  | 0.393395  | E(B3LYP)sol = -1546.56872606            |           |           |           |
| 8                                      | -2.464636 | 2.800765  | -1.577989 | E(B3LYP)gas = -1545.02597729            |           |           |           |
| 6                                      | 5.155676  | -1.205293 | -1.642757 | -----                                   |           |           |           |
| 6                                      | 3.899829  | -1.392063 | -2.231430 | 7                                       | -1.176285 | 1.698985  | -0.682732 |
| 6                                      | 2.734901  | -1.227451 | -1.476760 | 16                                      | -0.241324 | 2.543146  | 0.418694  |
| 6                                      | 2.801678  | -0.887130 | -0.118394 | 6                                       | 1.495616  | 2.127530  | 0.177656  |
| 6                                      | 4.065759  | -0.717512 | 0.466615  | 6                                       | 2.019227  | 0.985572  | 0.791829  |
| 6                                      | 5.232819  | -0.865314 | -0.287858 | 6                                       | 2.284405  | 2.944526  | -0.633830 |
| 1                                      | 3.826011  | -1.663505 | -3.288876 | 6                                       | 3.363682  | 0.666793  | 0.595064  |
| 1                                      | 1.752319  | -1.354711 | -1.936642 | 1                                       | 1.378054  | 0.369060  | 1.419295  |
| 1                                      | 4.126727  | -0.478780 | 1.532269  | 6                                       | 3.627185  | 2.607180  | -0.839235 |
| 1                                      | 6.208372  | -0.719918 | 0.186039  | 1                                       | 1.844042  | 3.837156  | -1.081147 |
| 6                                      | 1.551001  | -0.706850 | 0.710323  | 6                                       | 4.164081  | 1.471281  | -0.225370 |
| 6                                      | 0.387472  | -0.396511 | 0.019441  | 1                                       | 3.774927  | -0.228812 | 1.064316  |
| 6                                      | -0.864460 | -0.546719 | -0.396661 | 1                                       | 4.255216  | 3.238906  | -1.473948 |
| 1                                      | 6.067541  | -1.325916 | -2.235045 | 1                                       | 5.214000  | 1.209243  | -0.386378 |
| 6                                      | -1.849097 | -1.632127 | -0.130564 | 8                                       | -0.597661 | 2.061450  | 1.761726  |
| 6                                      | -3.106412 | -1.669008 | -0.766281 | 8                                       | -0.372754 | 3.974060  | 0.089575  |
| 6                                      | -1.533798 | -2.675768 | 0.762776  | 6                                       | 3.491272  | -3.129545 | 1.265674  |
| 6                                      | -4.004487 | -2.712469 | -0.529305 | 6                                       | 3.443248  | -2.822262 | -0.101092 |
| 1                                      | -3.377085 | -0.857291 | -1.440262 | 6                                       | 2.233190  | -2.474480 | -0.702041 |
| 6                                      | -2.433902 | -3.715121 | 0.999388  | 6                                       | 1.044330  | -2.454914 | 0.042807  |
| 1                                      | -0.576828 | -2.675526 | 1.282035  |                                         |           |           |           |



|                              |           |           |           |       |           |           |           |
|------------------------------|-----------|-----------|-----------|-------|-----------|-----------|-----------|
| 6                            | 1.099423  | -2.758583 | 1.407768  | 6     | -6.094594 | 0.521873  | -0.433227 |
| 6                            | 2.316082  | -3.087367 | 2.020223  | 1     | -4.059881 | -0.714872 | -2.876507 |
| 1                            | 4.360270  | -2.838127 | -0.697370 | 1     | -2.398551 | -0.545781 | -1.039403 |
| 1                            | 2.194632  | -2.192929 | -1.756524 | 1     | -5.468953 | 0.997436  | 1.580084  |
| 1                            | 0.179873  | -2.723559 | 1.999247  | 1     | -7.133668 | 0.811516  | -0.256048 |
| 1                            | 2.341983  | -3.312718 | 3.090435  | 6     | -2.843449 | 0.392935  | 1.494381  |
| 6                            | -0.276838 | -2.026066 | -0.595933 | 6     | -1.539803 | 0.284550  | 1.360188  |
| 6                            | -0.225989 | -0.517642 | -0.849876 | 6     | -0.233580 | 0.168825  | 1.208699  |
| 6                            | -1.294139 | 0.233194  | -0.508817 | 1     | -6.433497 | -0.038254 | -2.495827 |
| 1                            | 4.441834  | -3.392087 | 1.739248  | 6     | 0.639965  | 1.325448  | 0.870937  |
| 6                            | -2.650242 | -0.159256 | -0.019779 | 6     | 1.951449  | 1.393484  | 1.370540  |
| 6                            | -3.289316 | 0.531279  | 1.033495  | 6     | 0.173919  | 2.355404  | 0.036587  |
| 6                            | -3.343561 | -1.242015 | -0.600826 | 6     | 2.778643  | 2.467434  | 1.041570  |
| 6                            | -4.545413 | 0.137833  | 1.496937  | 1     | 2.320280  | 0.582811  | 2.000592  |
| 1                            | -2.769732 | 1.372755  | 1.492179  | 6     | 1.003044  | 3.429952  | -0.290446 |
| 6                            | -4.601493 | -1.637537 | -0.133726 | 1     | -0.838291 | 2.293165  | -0.370233 |
| 1                            | -2.901958 | -1.762190 | -1.453231 | 6     | 2.308987  | 3.488786  | 0.208682  |
| 6                            | -5.210711 | -0.952523 | 0.921133  | 1     | 3.799246  | 2.503106  | 1.430618  |
| 1                            | -5.011521 | 0.688035  | 2.320841  | 1     | 0.631677  | 4.220237  | -0.948004 |
| 1                            | -5.112802 | -2.479734 | -0.610534 | 1     | 2.960596  | 4.325591  | -0.055553 |
| 1                            | -6.196069 | -1.258035 | 1.286152  | 1     | -3.259423 | 0.601574  | 2.490331  |
| 1                            | -1.095537 | -2.373137 | 0.075950  | 6     | -0.136271 | -2.019489 | 2.375300  |
| 6                            | -1.099377 | 2.144854  | -2.070162 | 1     | -1.157871 | -2.362579 | 2.135633  |
| 1                            | -0.228523 | 1.696159  | -2.583010 | 1     | 0.518923  | -2.892756 | 2.473696  |
| 1                            | -2.012987 | 1.805212  | -2.582993 | 1     | -0.162095 | -1.473849 | 3.329001  |
| 1                            | -1.055965 | 3.241706  | -2.114092 | 16    | 0.792517  | -1.876831 | -0.146560 |
| 7                            | -0.712663 | -3.269767 | -2.873927 | 6     | 2.315072  | -1.075841 | -0.642734 |
| 6                            | -0.503426 | -2.733827 | -1.865455 | 6     | 2.277617  | -0.084430 | -1.623884 |
| -----                        |           |           |           | 6     | 3.505613  | -1.460453 | -0.020649 |
| <b>Structure S8. 3b</b>      |           |           |           | 6     | 3.467843  | 0.557325  | -1.972962 |
| E(B3LYP)sol = -1453.59356227 |           |           |           | 1     | 1.326345  | 0.184077  | -2.083736 |
| E(B3LYP)gas = -1452.22545574 |           |           |           | 6     | 4.687814  | -0.811681 | -0.380062 |
| -----                        |           |           |           | 1     | 3.496432  | -2.255584 | 0.726907  |
| 7                            | 0.416980  | -1.107495 | 1.365882  | 6     | 4.667104  | 0.198623  | -1.349723 |
| 6                            | -5.702305 | 0.046691  | -1.687791 | 1     | 3.454774  | 1.346285  | -2.728047 |
| 6                            | -4.369463 | -0.329257 | -1.901658 | 1     | 5.629467  | -1.096465 | 0.095425  |
| 6                            | -3.431351 | -0.226598 | -0.875438 | 1     | 5.594866  | 0.707628  | -1.622698 |
| 6                            | -3.817078 | 0.261982  | 0.389718  | 8     | -0.231635 | -1.536986 | -1.142492 |
| 6                            | -5.158832 | 0.625462  | 0.599223  | 8     | 1.091439  | -3.272724 | 0.184247  |
| -----                        |           |           |           | ----- |           |           |           |

**Structure S9. TS1**

E(B3LYP)sol = -1546.56951874

E(B3LYP)gas = -1545.00256512

|    |           |           |           |
|----|-----------|-----------|-----------|
| 7  | -0.748269 | -0.950090 | -0.858090 |
| 6  | 6.291295  | 0.148675  | 1.196332  |
| 6  | 5.065734  | -0.300739 | 1.703667  |
| 6  | 3.915892  | -0.289764 | 0.913333  |
| 6  | 3.973890  | 0.171548  | -0.421837 |
| 6  | 5.217280  | 0.609573  | -0.924895 |
| 6  | 6.361282  | 0.603482  | -0.126238 |
| 1  | 5.004252  | -0.672114 | 2.730885  |
| 1  | 2.966649  | -0.674020 | 1.291734  |
| 1  | 5.278486  | 0.958511  | -1.960758 |
| 1  | 7.314124  | 0.950705  | -0.537809 |
| 6  | 2.786721  | 0.209981  | -1.271496 |
| 6  | 1.556268  | -0.154774 | -0.917027 |
| 6  | 0.250127  | 0.066670  | -0.771717 |
| 1  | 7.186802  | 0.140469  | 1.824820  |
| 6  | -0.245240 | 1.449928  | -0.534562 |
| 6  | -1.475248 | 1.869780  | -1.074154 |
| 6  | 0.493512  | 2.372915  | 0.231377  |
| 6  | -1.945293 | 3.169180  | -0.868594 |
| 1  | -2.067617 | 1.155807  | -1.649135 |
| 6  | 0.022065  | 3.668804  | 0.438868  |
| 1  | 1.437771  | 2.049626  | 0.673995  |
| 6  | -1.200851 | 4.077953  | -0.110573 |
| 1  | -2.905952 | 3.468617  | -1.298041 |
| 1  | 0.608477  | 4.364512  | 1.046305  |
| 1  | -1.571367 | 5.093085  | 0.058569  |
| 1  | 2.937090  | 0.525527  | -2.313193 |
| 6  | -0.734921 | -1.926151 | -1.954950 |
| 1  | -0.022858 | -2.743134 | -1.763737 |
| 1  | -1.750011 | -2.327346 | -2.102331 |
| 1  | -0.441990 | -1.381163 | -2.864056 |
| 7  | 1.882788  | -3.552349 | -0.601733 |
| 6  | 1.805444  | -2.523301 | -0.039346 |
| 16 | -1.452755 | -1.450180 | 0.601855  |
| 6  | -3.114143 | -0.732022 | 0.500485  |

|   |           |           |           |
|---|-----------|-----------|-----------|
| 6 | -3.359459 | 0.517246  | 1.075352  |
| 6 | -4.127854 | -1.439632 | -0.152873 |
| 6 | -4.635372 | 1.077135  | 0.969749  |
| 1 | -2.549104 | 1.035275  | 1.589234  |
| 6 | -5.399212 | -0.868827 | -0.259224 |
| 1 | -3.912817 | -2.432700 | -0.551651 |
| 6 | -5.652805 | 0.390124  | 0.298341  |
| 1 | -4.831957 | 2.058161  | 1.410240  |
| 1 | -6.197769 | -1.413104 | -0.770993 |
| 1 | -6.649179 | 0.833338  | 0.215359  |
| 8 | -0.789308 | -0.760940 | 1.709564  |
| 8 | -1.663850 | -2.898661 | 0.560379  |

-----  
 Frequencies -- -165.0093  
 Red. masses -- 7.5313  
 Frc consts -- 0.1208  
 IR Inten -- 98.9277

**Structure S10. int1**

E(B3LYP)sol = -1546.61454754

E(B3LYP)gas = -1545.08262417

|   |           |           |           |
|---|-----------|-----------|-----------|
| 7 | 0.717893  | -1.190469 | 0.967298  |
| 6 | -6.749573 | 0.349383  | -0.623492 |
| 6 | -5.924293 | -0.753754 | -0.881421 |
| 6 | -4.559351 | -0.722734 | -0.602933 |
| 6 | -3.942318 | 0.427079  | -0.032130 |
| 6 | -4.803609 | 1.538303  | 0.207351  |
| 6 | -6.165129 | 1.500697  | -0.077433 |
| 1 | -6.352350 | -1.661703 | -1.318957 |
| 1 | -3.958632 | -1.599768 | -0.837562 |
| 1 | -4.370937 | 2.448145  | 0.635536  |
| 1 | -6.781630 | 2.381868  | 0.129940  |
| 6 | -2.542030 | 0.577474  | 0.288929  |
| 6 | -1.495441 | -0.348466 | 0.362749  |
| 6 | -0.114213 | -0.076420 | 0.619386  |
| 1 | -7.819316 | 0.315133  | -0.848042 |
| 6 | 0.530740  | 1.226164  | 0.624774  |
| 6 | 1.753724  | 1.423732  | 1.331273  |
| 6 | 0.062236  | 2.348264  | -0.117344 |

|    |           |           |           |   |           |           |           |
|----|-----------|-----------|-----------|---|-----------|-----------|-----------|
| 6  | 2.443344  | 2.630181  | 1.298561  | 6 | -3.395012 | 0.613781  | 2.091064  |
| 1  | 2.176800  | 0.588591  | 1.890576  | 1 | -1.357587 | -0.149945 | 2.038324  |
| 6  | 0.763696  | 3.552742  | -0.151137 | 6 | -4.907267 | -0.332931 | 0.446450  |
| 1  | -0.840559 | 2.248841  | -0.719330 | 1 | -4.036917 | -1.831813 | -0.871762 |
| 6  | 1.959204  | 3.719032  | 0.559228  | 6 | -4.663976 | 0.547040  | 1.507882  |
| 1  | 3.382552  | 2.720682  | 1.853696  | 1 | -3.200505 | 1.311580  | 2.908599  |
| 1  | 0.370489  | 4.376782  | -0.756056 | 1 | -5.902000 | -0.387013 | -0.004349 |
| 1  | 2.502471  | 4.667586  | 0.532977  | 1 | -5.467904 | 1.189045  | 1.878176  |
| 1  | -2.264263 | 1.597328  | 0.558105  | 8 | -0.241485 | -2.120821 | 0.908620  |
| 6  | 0.688963  | -1.788093 | 2.300224  | 8 | -1.883057 | -3.290303 | -0.646444 |
| 1  | -0.228439 | -2.380901 | 2.456984  | 6 | 5.324333  | -1.164215 | 1.811895  |
| 1  | 1.554269  | -2.449564 | 2.441996  | 6 | 3.964492  | -1.492377 | 1.814310  |
| 1  | 0.725057  | -0.979460 | 3.047426  | 6 | 3.109400  | -0.990976 | 0.827395  |
| 7  | -2.068663 | -2.892614 | 0.320394  | 6 | 3.602659  | -0.137286 | -0.173056 |
| 6  | -1.808856 | -1.759937 | 0.300365  | 6 | 4.967678  | 0.192473  | -0.163989 |
| 16 | 1.570259  | -1.959495 | -0.264891 | 6 | 5.823622  | -0.319209 | 0.813818  |
| 6  | 2.910759  | -0.814832 | -0.652191 | 1 | 3.560919  | -2.153880 | 2.586721  |
| 6  | 2.689428  | 0.207507  | -1.578007 | 1 | 2.054050  | -1.276165 | 0.817313  |
| 6  | 4.125432  | -0.932331 | 0.026869  | 1 | 5.348778  | 0.879626  | -0.924458 |
| 6  | 3.697184  | 1.146560  | -1.803973 | 1 | 6.884560  | -0.050825 | 0.801906  |
| 1  | 1.727243  | 0.267809  | -2.087040 | 6 | 2.694115  | 0.417370  | -1.243543 |
| 6  | 5.131562  | 0.006602  | -0.214513 | 6 | 1.442599  | -0.173147 | -1.343818 |
| 1  | 4.265813  | -1.756165 | 0.729160  | 6 | 0.137141  | -0.020830 | -1.159738 |
| 6  | 4.914530  | 1.049747  | -1.121789 | 1 | 5.991658  | -1.563495 | 2.581835  |
| 1  | 3.522454  | 1.968053  | -2.502737 | 6 | -0.574119 | 1.193582  | -0.673269 |
| 1  | 6.087305  | -0.073393 | 0.311036  | 6 | -1.830933 | 1.564727  | -1.191805 |
| 1  | 5.697286  | 1.793279  | -1.295381 | 6 | -0.013970 | 1.993411  | 0.338673  |
| 8  | 0.752488  | -2.029794 | -1.479167 | 6 | -2.501826 | 2.691114  | -0.716898 |
| 8  | 2.189972  | -3.167836 | 0.306919  | 1 | -2.288269 | 0.933447  | -1.956408 |

-----  
**Structure S11. TS2**

E(B3LYP)sol = -1546.54212439

E(B3LYP)gas = -1544.99410699  
 -----

|    |           |           |           |   |           |           |           |
|----|-----------|-----------|-----------|---|-----------|-----------|-----------|
| 7  | -0.776830 | -1.137120 | -1.483066 | 1 | 3.207273  | 0.542498  | -2.204706 |
| 16 | -1.276110 | -2.048335 | -0.134784 | 6 | -0.430171 | -1.937721 | -2.659631 |
| 6  | -2.613463 | -1.050390 | 0.542291  | 1 | -0.371456 | -1.245438 | -3.511944 |
| 6  | -2.360541 | -0.194333 | 1.614101  | 1 | 0.551276  | -2.431305 | -2.557658 |
| 6  | -3.877761 | -1.138330 | -0.044120 | 1 | -1.210624 | -2.686734 | -2.844943 |

|                            |                |                |           |       |           |           |           |
|----------------------------|----------------|----------------|-----------|-------|-----------|-----------|-----------|
| 7                          | 2.762983       | 3.534427       | -0.860890 | 1     | -5.472069 | -0.928047 | -3.144600 |
| 6                          | 2.871510       | 2.370334       | -0.893417 | 6     | 0.212959  | 0.949236  | 0.704452  |
| -----                      |                |                |           | 6     | 1.345068  | 1.586691  | 1.254772  |
| Frequencies --             | -339.5953      |                |           | 6     | -0.445014 | 1.597915  | -0.356859 |
| Red. masses --             | 11.3836        |                |           | 6     | 1.789098  | 2.818559  | 0.778305  |
| Frc consts --              | 0.7735         |                |           | 1     | 1.888575  | 1.079288  | 2.054944  |
| IR Inten --                | 445.2308       |                |           | 6     | -0.001621 | 2.832215  | -0.838574 |
|                            |                |                |           | 1     | -1.304232 | 1.111766  | -0.820276 |
| <b>Structure S12. int2</b> |                |                |           | 6     | 1.117822  | 3.451591  | -0.275921 |
| E(B3LYP)sol =              |                | -1546.56162271 |           | 1     | 2.672928  | 3.286435  | 1.223019  |
| E(B3LYP)gas =              | -1545.01510624 |                |           | 1     | -0.534392 | 3.309872  | -1.666467 |
| -----                      |                |                |           | 1     | 1.468214  | 4.415891  | -0.655840 |
| 7                          | 0.897824       | -1.304830      | 1.373823  | 1     | -3.421282 | -0.342539 | 2.268704  |
| 16                         | 1.476928       | -1.941817      | -0.084244 | 6     | 0.827172  | -2.262028 | 2.480840  |
| 6                          | 2.705521       | -0.722953      | -0.600890 | 1     | 0.694542  | -1.673049 | 3.399565  |
| 6                          | 2.404286       | 0.172244       | -1.626240 | 1     | -0.040843 | -2.934173 | 2.394003  |
| 6                          | 3.939080       | -0.693441      | 0.054475  | 1     | 1.759934  | -2.838752 | 2.537331  |
| 6                          | 3.350589       | 1.135573       | -1.985403 | 7     | -2.617705 | 2.586342  | 2.068081  |
| 1                          | 1.425767       | 0.123222       | -2.103480 | 6     | -2.660686 | 1.470017  | 1.747265  |
| 6                          | 4.880150       | 0.269185       | -0.314531 | ----- |           |           |           |
| 1                          | 4.145670       | -1.420528      | 0.842011  |       |           |           |           |
| 6                          | 4.584452       | 1.186873       | -1.330625 |       |           |           |           |
| 1                          | 3.111611       | 1.860175       | -2.767437 |       |           |           |           |
| 1                          | 5.847645       | 0.307136       | 0.193974  |       |           |           |           |
| 1                          | 5.318625       | 1.948542       | -1.607842 |       |           |           |           |
| 8                          | 0.448117       | -1.952779      | -1.138199 |       |           |           |           |
| 8                          | 2.227133       | -3.175737      | 0.217615  |       |           |           |           |
| 6                          | -4.918761      | -0.739836      | -2.219344 |       |           |           |           |
| 6                          | -3.636725      | -1.267365      | -2.042674 |       |           |           |           |
| 6                          | -2.920805      | -1.027459      | -0.862513 |       |           |           |           |
| 6                          | -3.486931      | -0.250186      | 0.158856  |       |           |           |           |
| 6                          | -4.775940      | 0.274970       | -0.025090 |       |           |           |           |
| 6                          | -5.488163      | 0.037430       | -1.203446 |       |           |           |           |
| 1                          | -3.177661      | -1.871451      | -2.830727 |       |           |           |           |
| 1                          | -1.916803      | -1.437095      | -0.730131 |       |           |           |           |
| 1                          | -5.218786      | 0.889514       | 0.764831  |       |           |           |           |
| 1                          | -6.489004      | 0.461575       | -1.330145 |       |           |           |           |
| 6                          | -2.729531      | 0.007504       | 1.473974  |       |           |           |           |
| 6                          | -1.465414      | -0.825053      | 1.575134  |       |           |           |           |
| 6                          | -0.251958      | -0.371879      | 1.220339  |       |           |           |           |

## References

1. M. Taj Muhammad, Y. Jiao, C. Ye, M.-F. Chiou, M. Israr, X. Zhu, Y. Li, Z. Wen, A. Studer and H. Bao, *Nat. Commun.*, 2020, **11**, 416.
2. G. Yin, Y. Zhu, L. Zhang, P. Lu and Y. Wang, *Org. Lett.*, 2011, **13**, 940.
3. (a) C. Lee, W. Yang and R. G. Parr, *Phys. Rev. B*, 1988, **37**, 785; (b) A. D. Becke, *J. Chem. Phys.*, 1993, **98**, 5648.
4. (a) S. Grimme, J. Antony, S. Ehrlich and H. Krieg, *J. Chem. Phys.*, 2010, **132**, 154104; (b) S. Grimme, S. Ehrlich and L. Goerigk, *J. Comput. Chem.*, 2011, **32**, 1456.
5. (a) F. Weigend, *Phys. Chem. Chem. Phys.*, 2006, **8**, 1057; (b) F. Weigend and R. Ahlrichs, *Phys. Chem. Chem. Phys.*, 2005, **7**, 3297.
6. A. V. Marenich, C. J. Cramer and D. G. Truhlar, *J. Phys. Chem. B*, 2009, **113**, 6378.
7. (a) J. P. Foster and F. Weinhold, *J. Am. Chem. Soc.*, 1980, **102**, 7211; (b) A. E. Reed and F. Weinhold, *J. Chem. Phys.*, 1985, **83**, 1736; (c) A. E. Reed, R. B. Weinstock and F. Weinhold, *J. Chem. Phys.*, 1985, **83**, 735; (d) A. E. Reed, L. A. Curtiss and F. Weinhold, *Chem. Rev.*, 1988, **88**, 899.
8. M. J. Frisch, G. W. Trucks, H. B. Schlegel, G. E. Scuseria, M. A. Robb, J. R. Cheeseman, G. Scalmani, V. Barone, B. Mennucci, G. A. Petersson, H. Nakatsuji, M. Caricato, X. Li, H. P. Hratchian, A. F. Izmaylov, J. Bloino, G. Zheng, J. L. Sonnenberg, M. Hada, M. Ehara, K. Toyota, R. Fukuda, J. Hasegawa, M. Ishida, T. Nakajima, Y. Honda, O. Kitao, H. Nakai, T. Vreven, J. A. Montgomery Jr., J. E. Peralta, F. Ogliaro, M. J. Bearpark, J. Heyd, E. N. Brothers, K. N. Kudin, V. N. Staroverov, R. Kobayashi, J. Normand, K. Raghavachari, A. P. Rendell, J. C. Burant, S. S. Iyengar, J. Tomasi, M. Cossi, N. Rega, N. J. Millam, M. Klene, J. E. Knox, J. B. Cross, V. Bakken, C. Adamo, J. Jaramillo, R. Gomperts, R. E. Stratmann, O. Yazyev, A. J. Austin, R. Cammi, C. Pomelli, J. W. Ochterski, R. L. Martin, K. Morokuma, V. G. Zakrzewski, G. A. Voth, P. Salvador, J. J. Dannenberg, S. Dapprich, A. D. Daniels, Ö. Farkas, J. B. Foresman, J. V. Ortiz, J. Cioslowski and D. J. Fox, Gaussian 09, Revision D.01 ed.; Gaussian, Inc.: Wallingford, CT, USA, 2013.

# NMR spectra

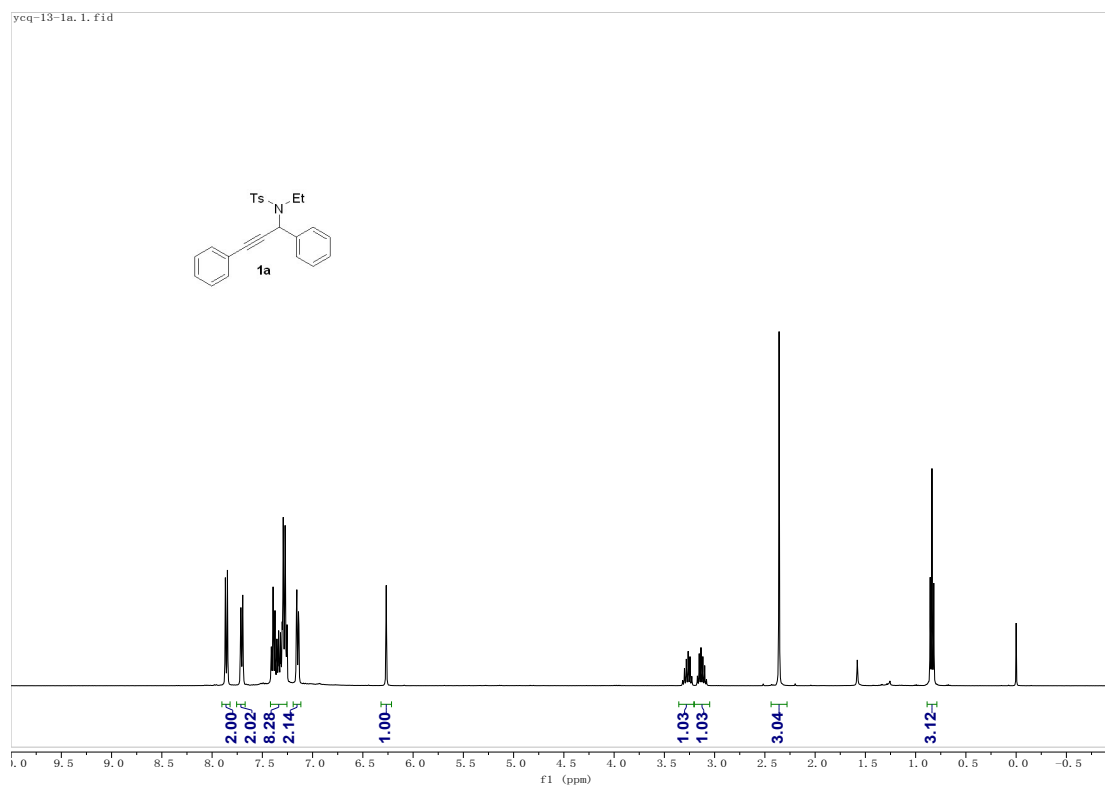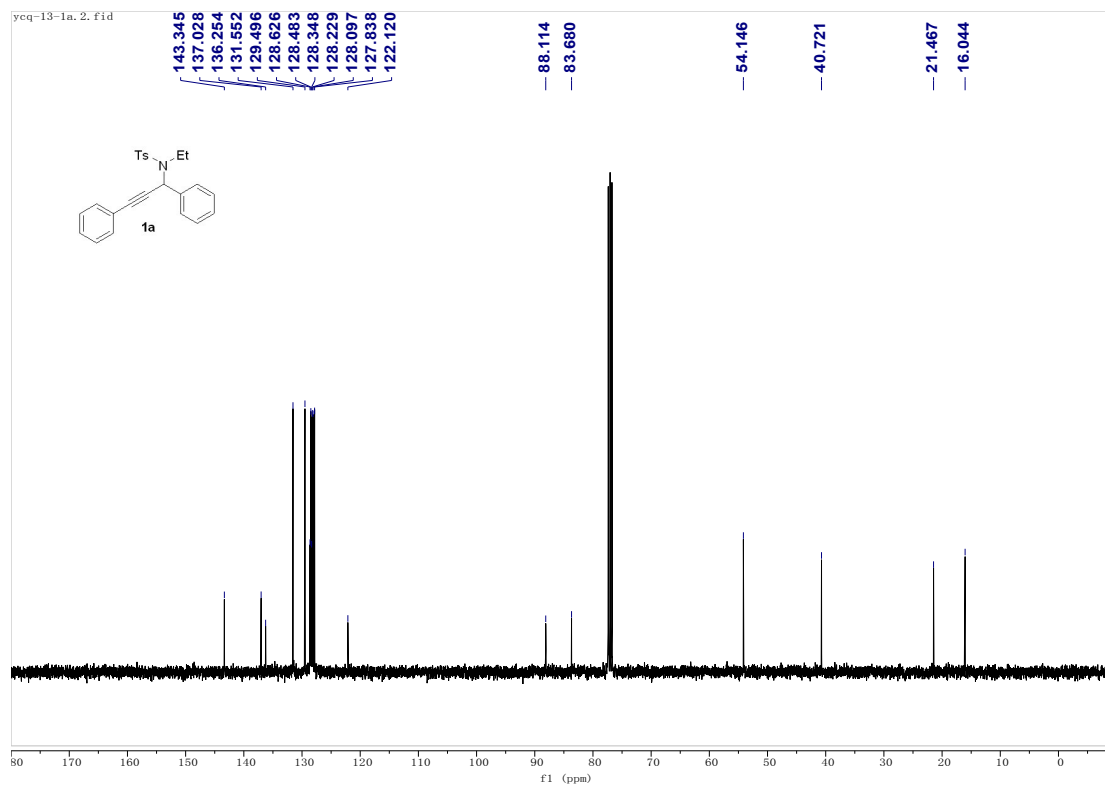

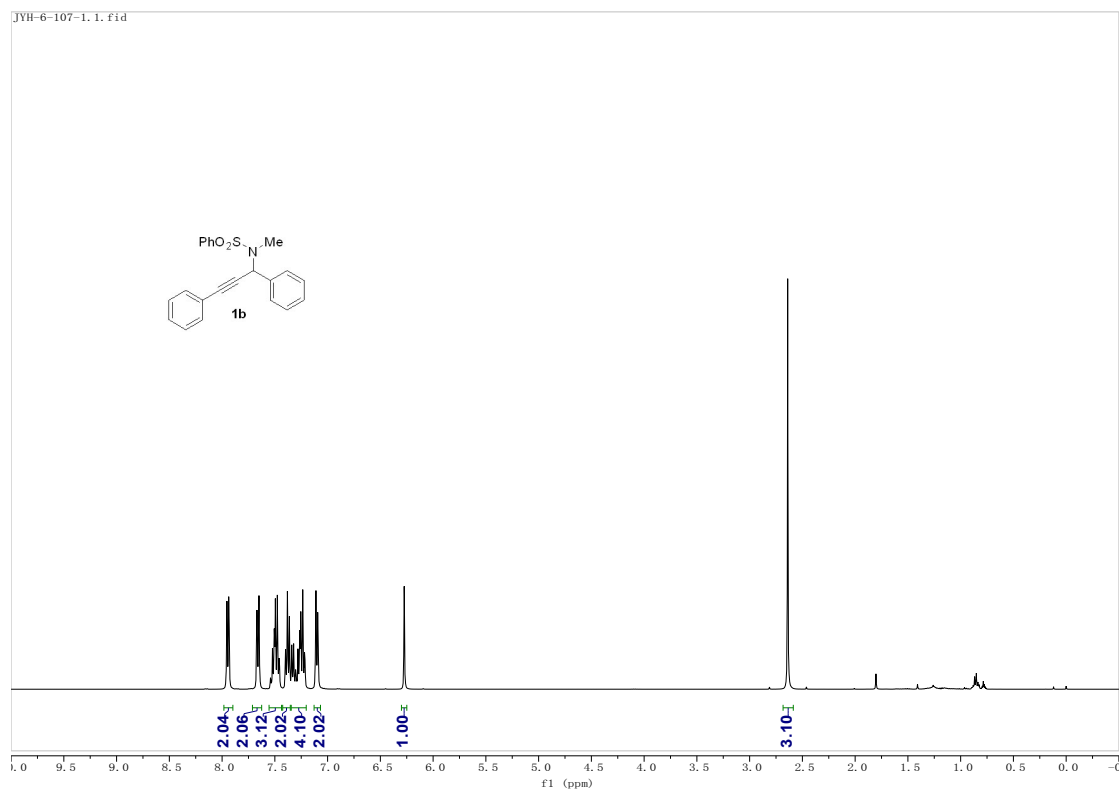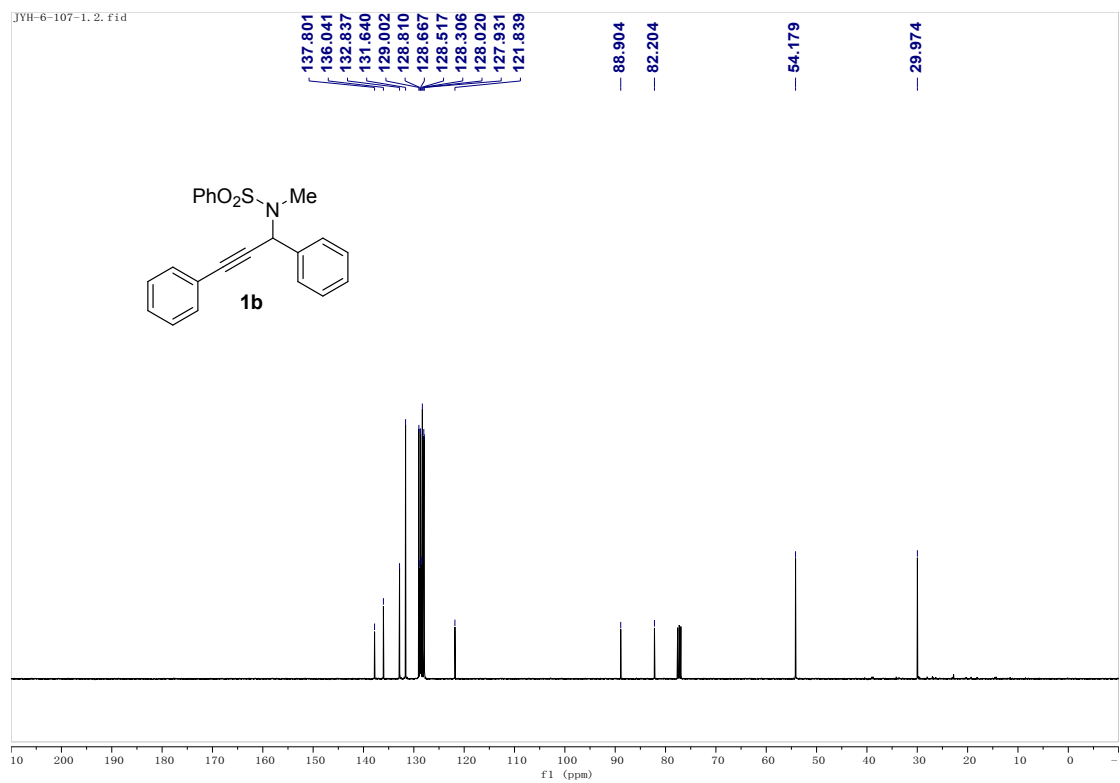

JYH-7-71.1.Fid

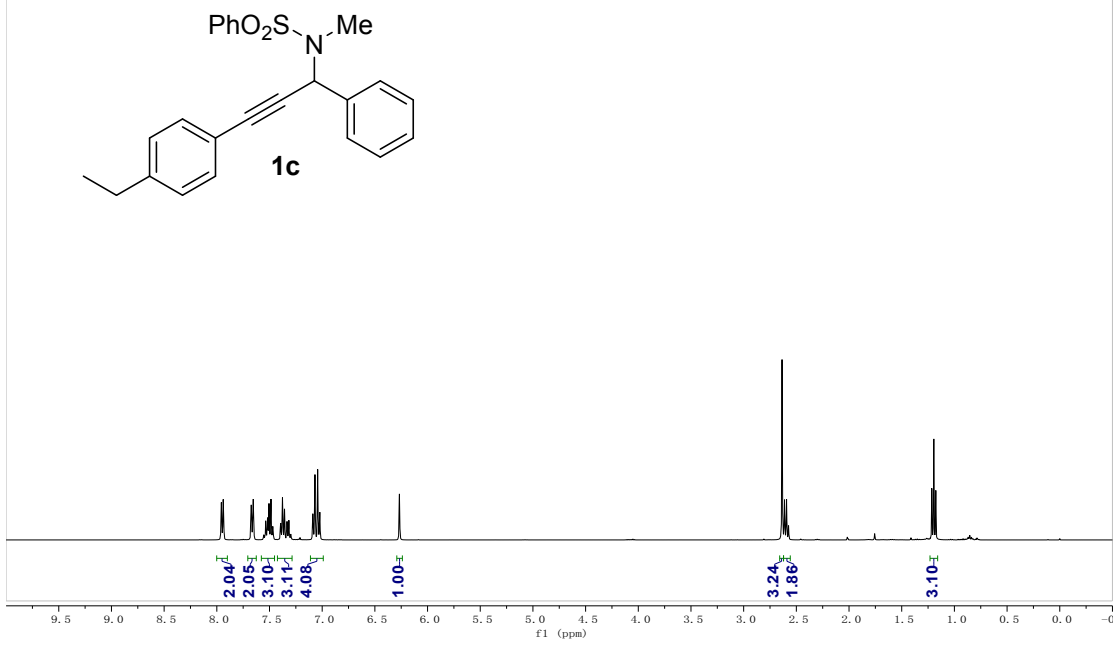

JYH-7-71.2.Fid

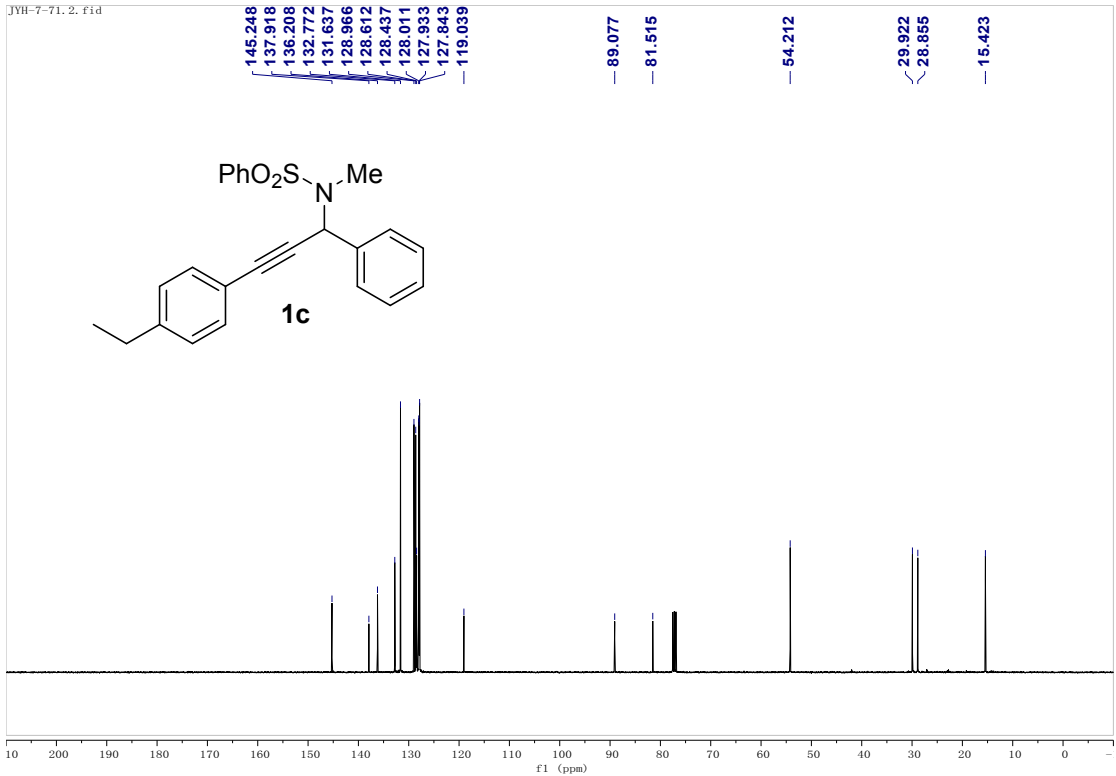



JYH-7-49.1.Fid

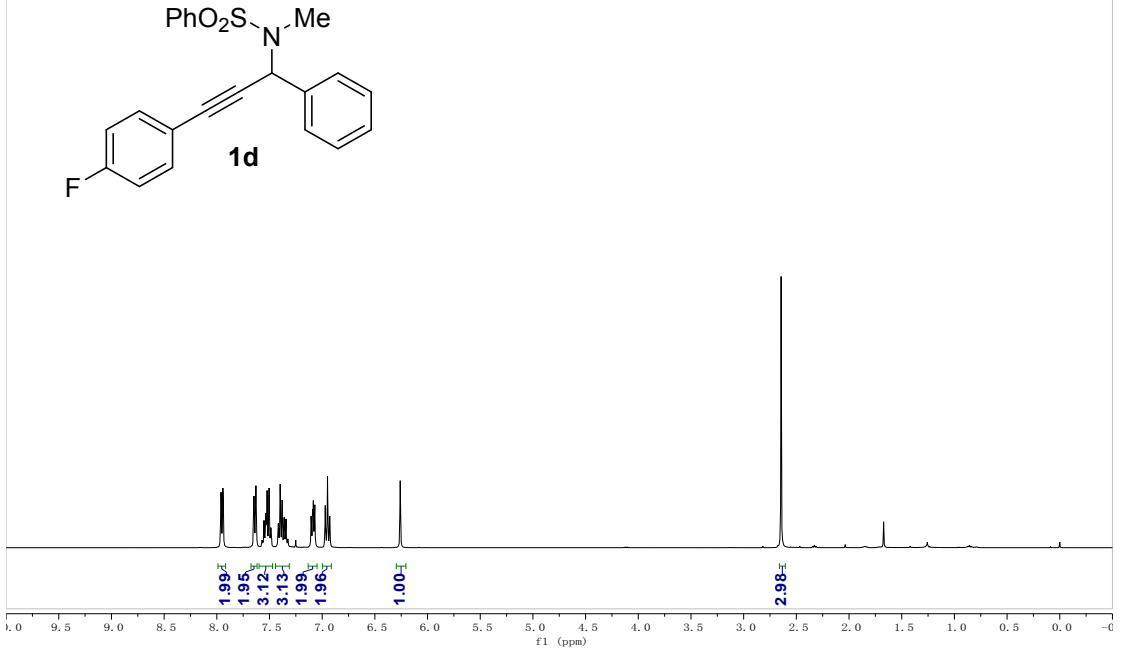

JYH-7-49.3.Fid

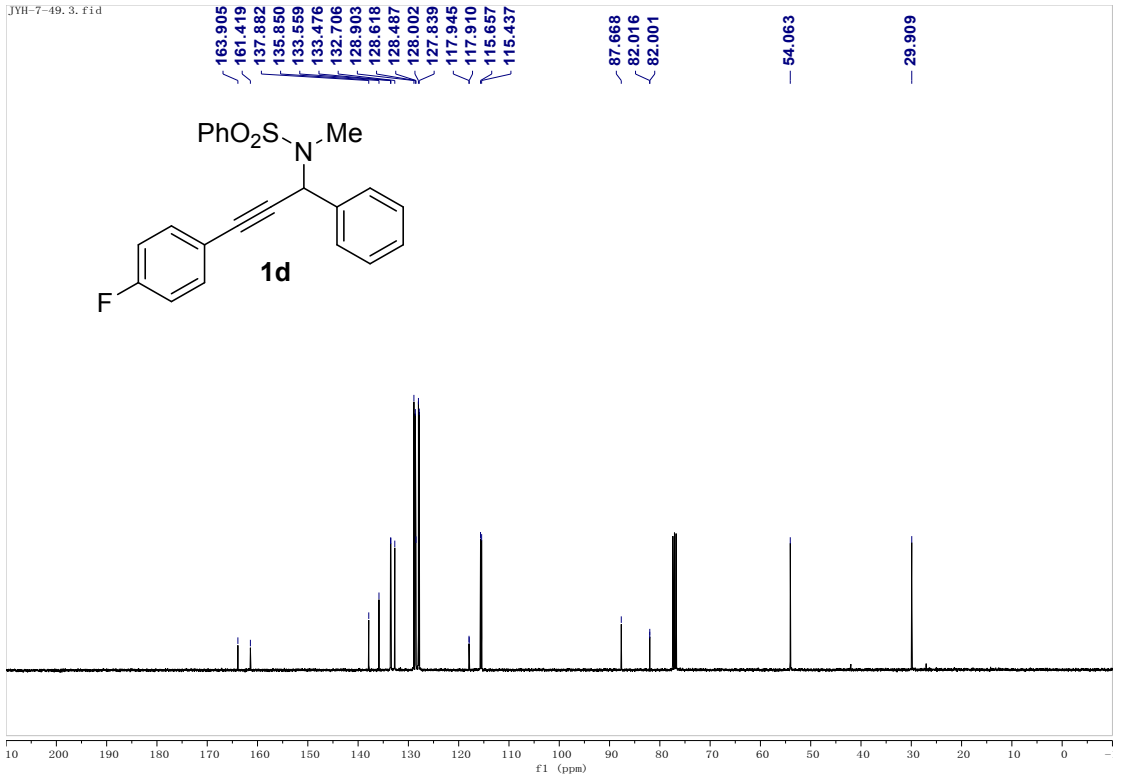

JYH-7-77-1.1.fid

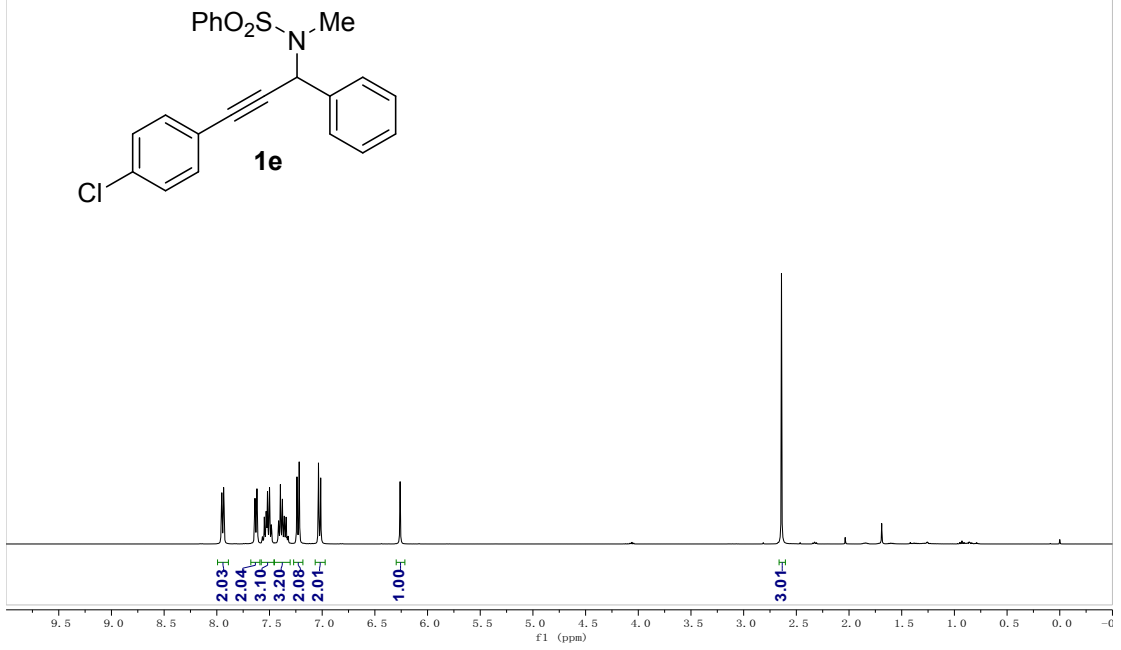

JYH-7-77-1.2.fid

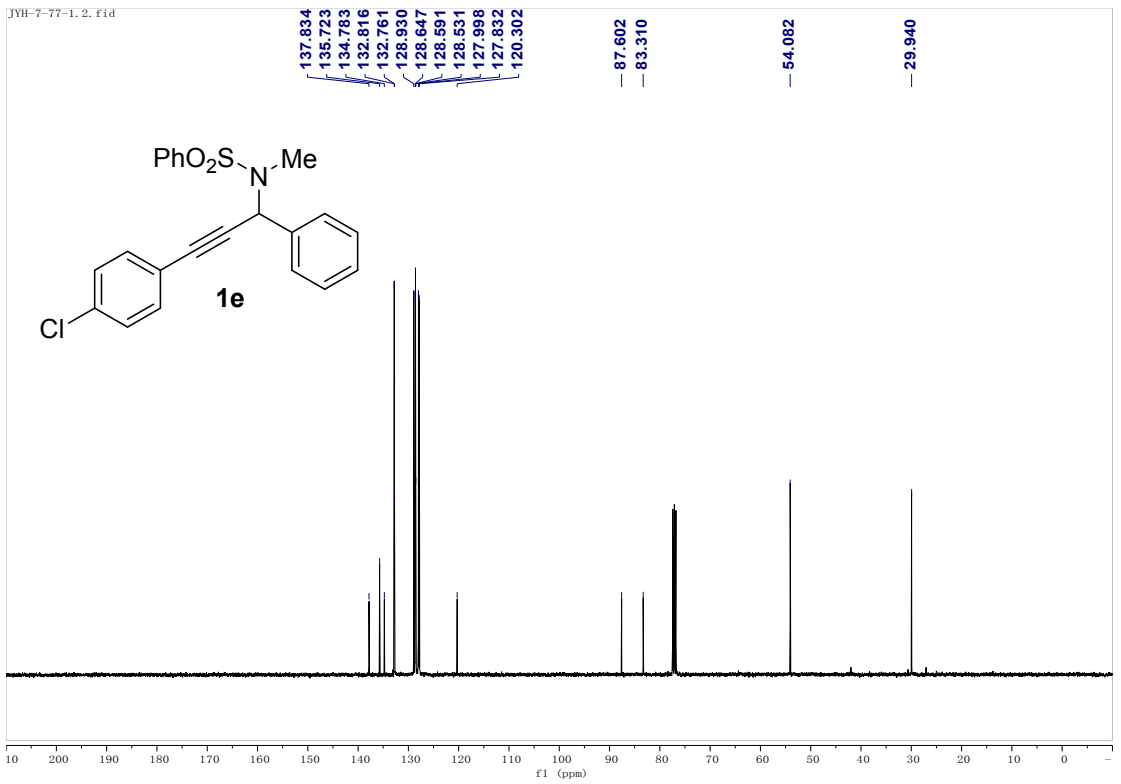

JYH-7-83-3  
single\_pulse

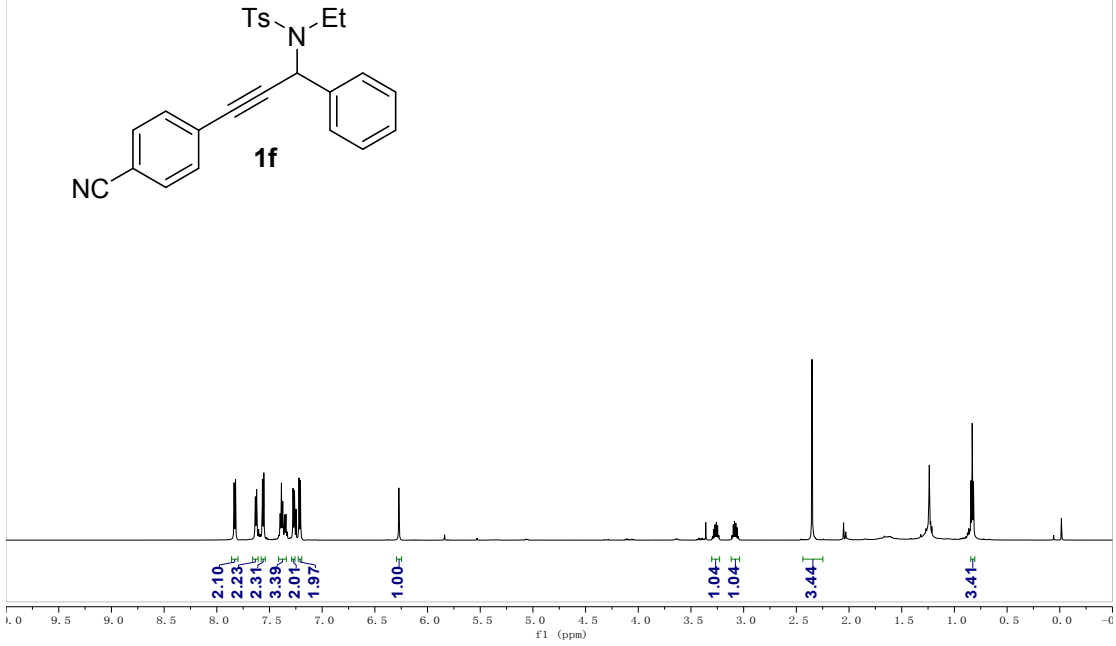

JYH-7-83-3  
single\_pulse decoupled gated NOE

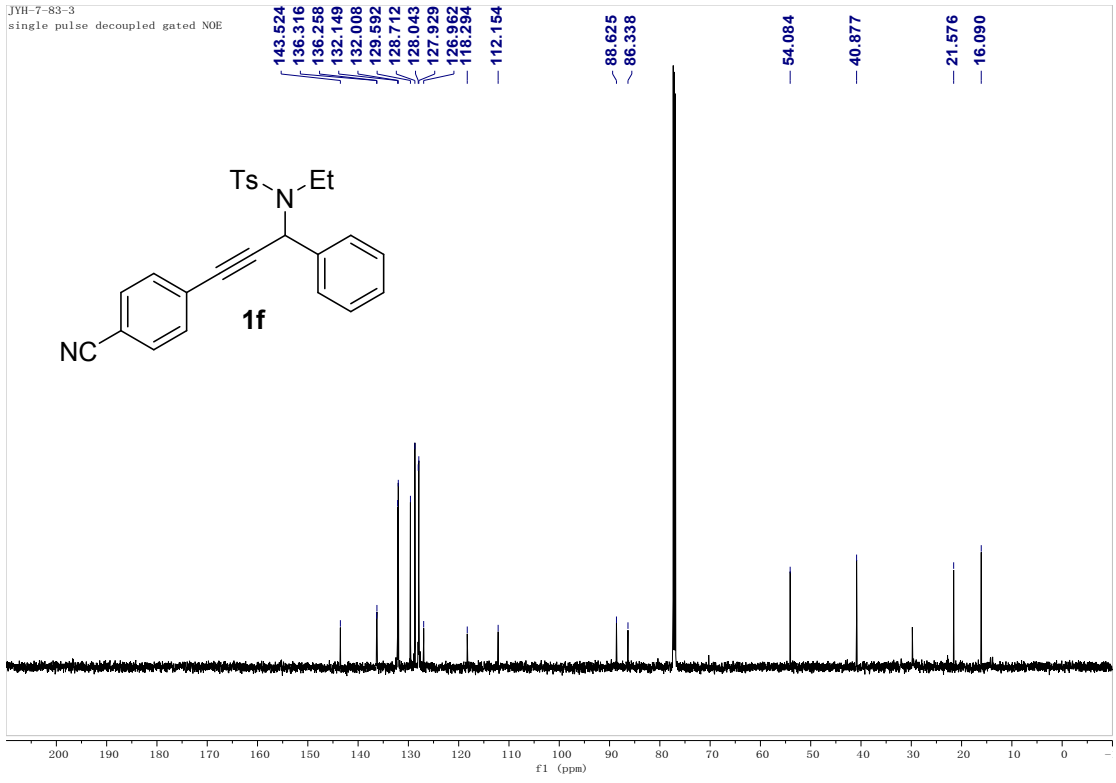

JYH-7-93-2  
single\_pulse

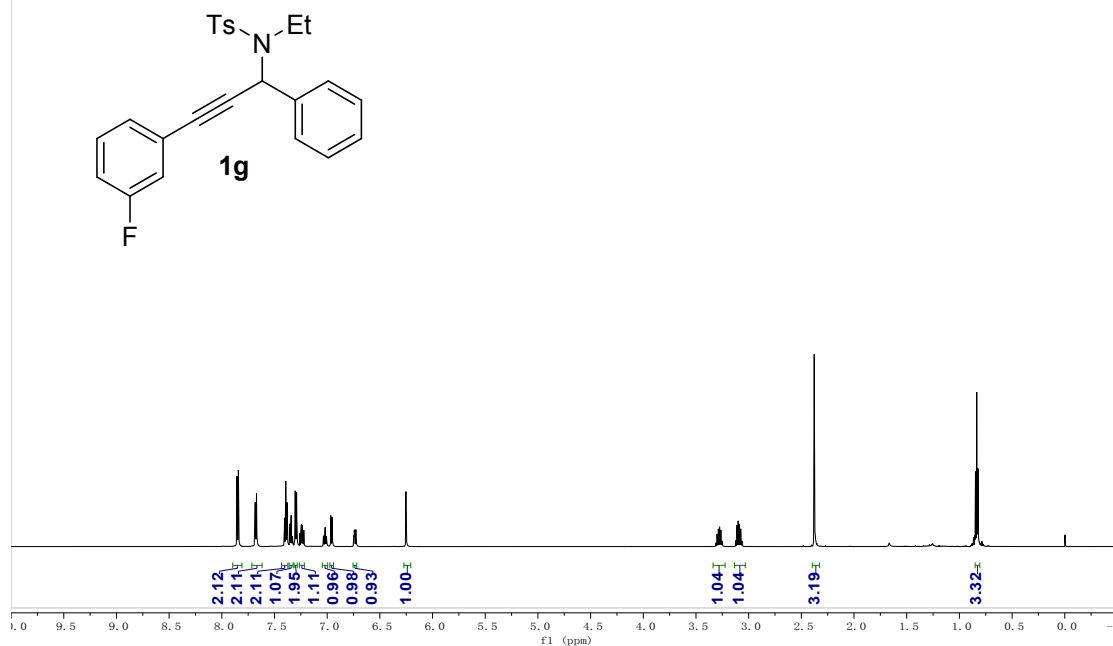

JYH-7-93-2-C  
single\_pulse decoupled gated NOE

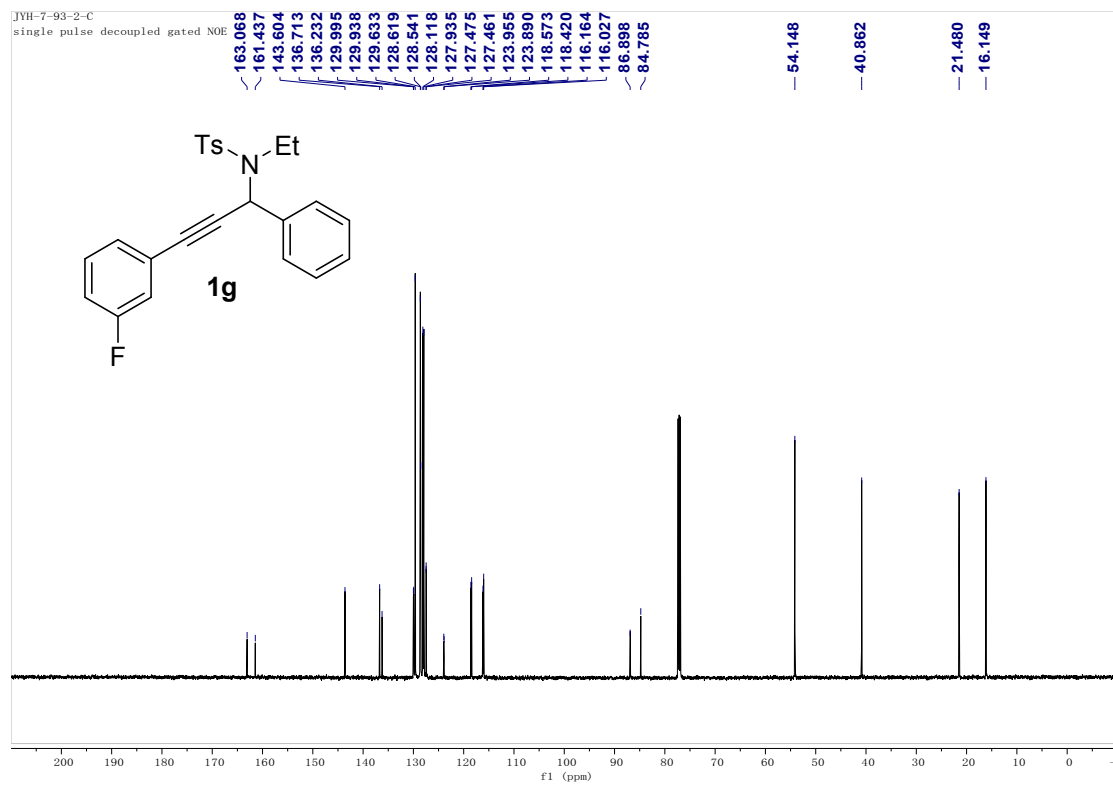

JYH-7-93-1  
single\_pulse

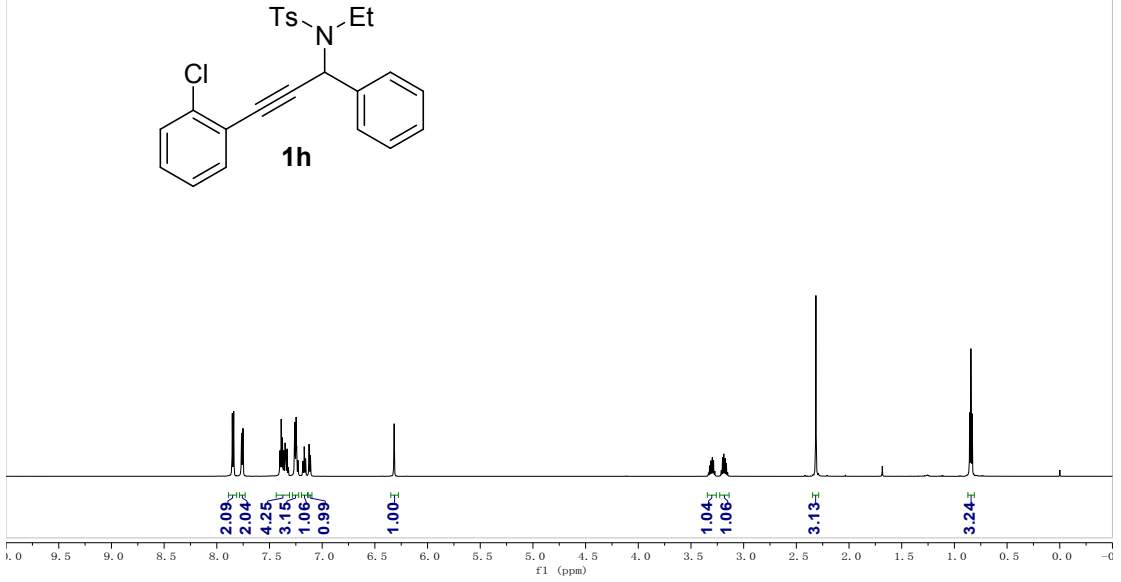

JYH-7-93-1-C  
single\_pulse decoupled gated NOE

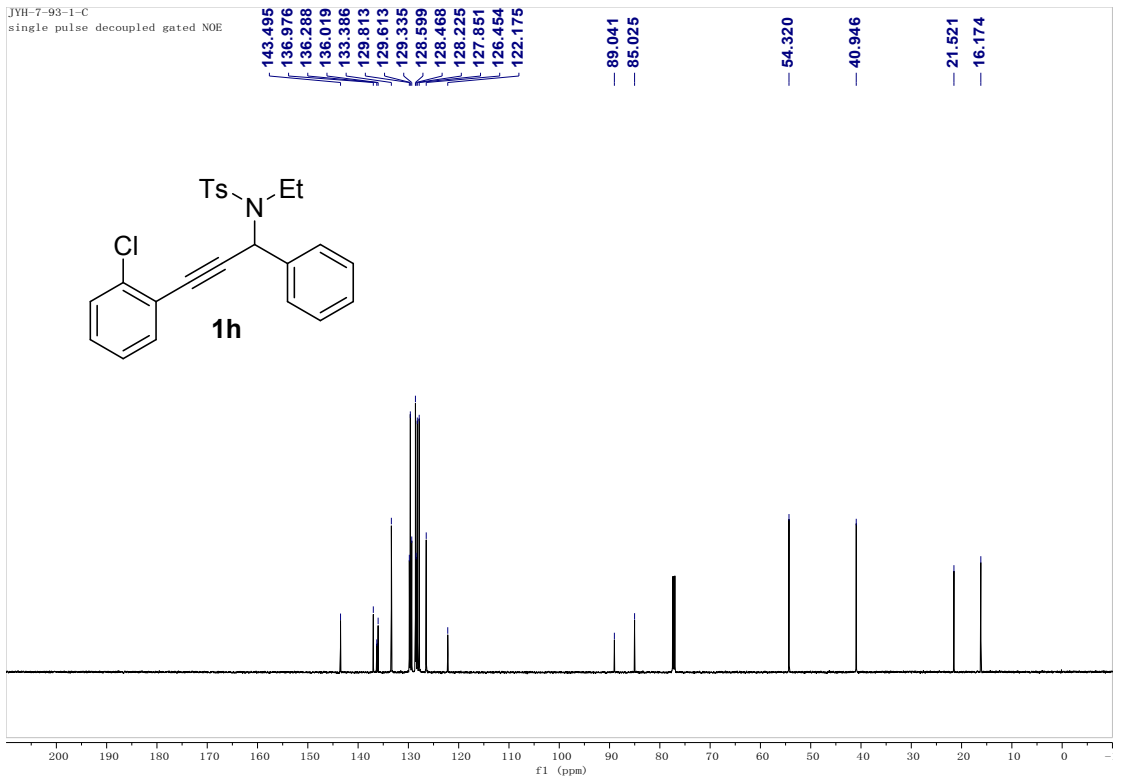

JYH-6-114.1.fid

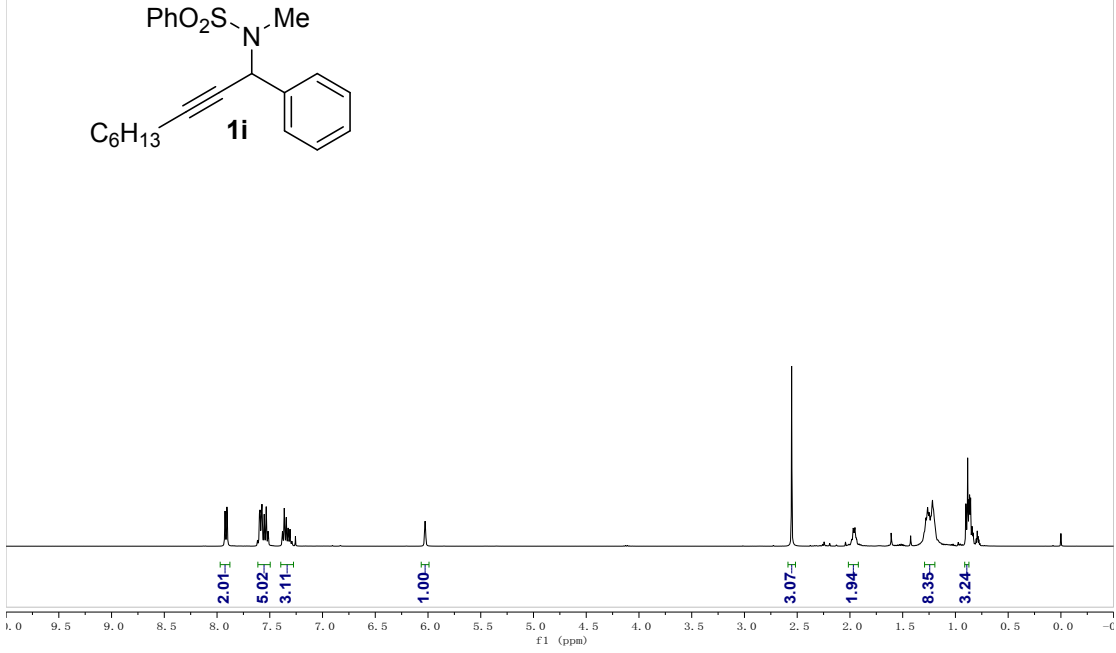

JYH-6-114.2.fid

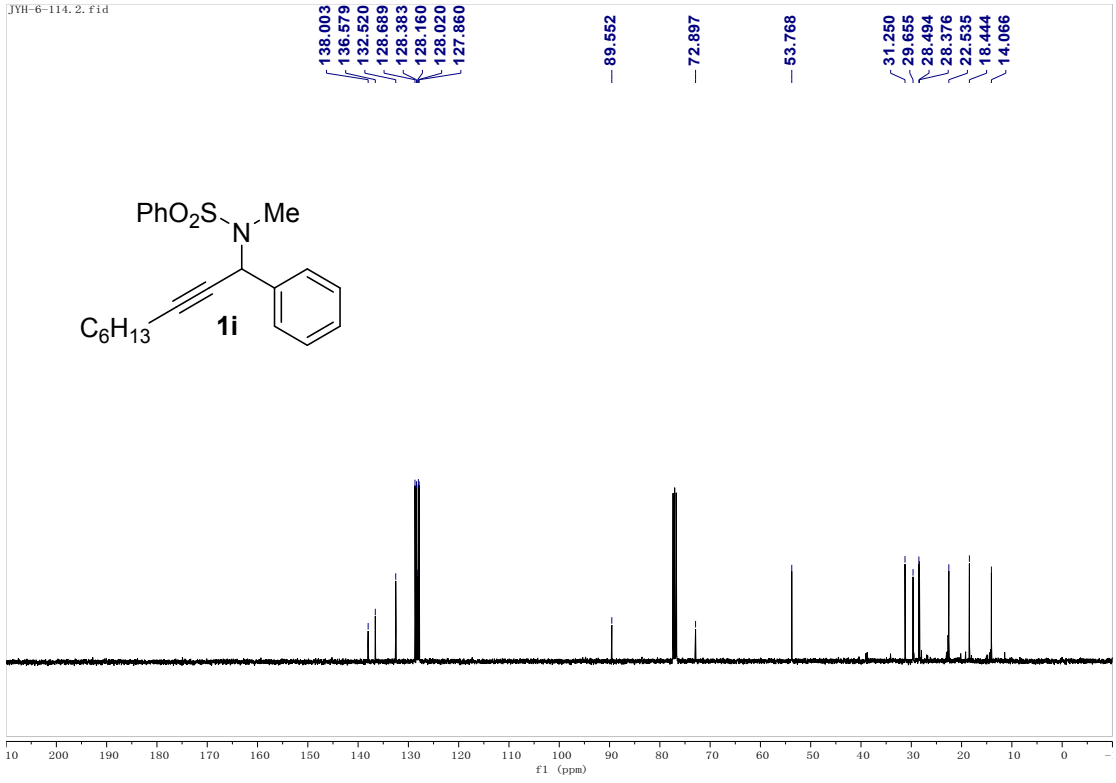

JYH-7-25.1.fid

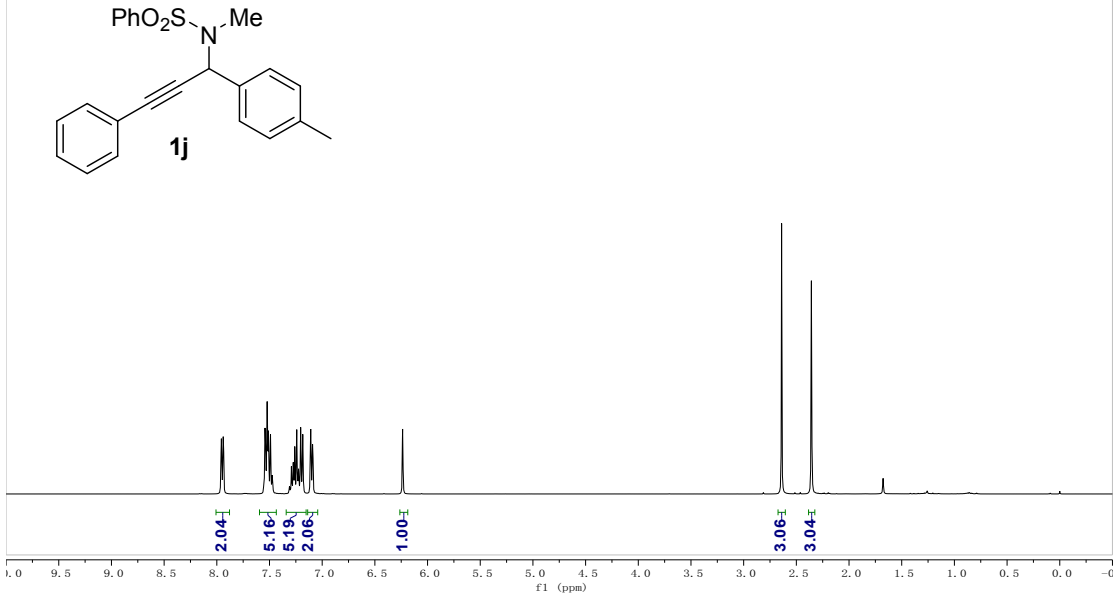

JYH-7-25.2.fid

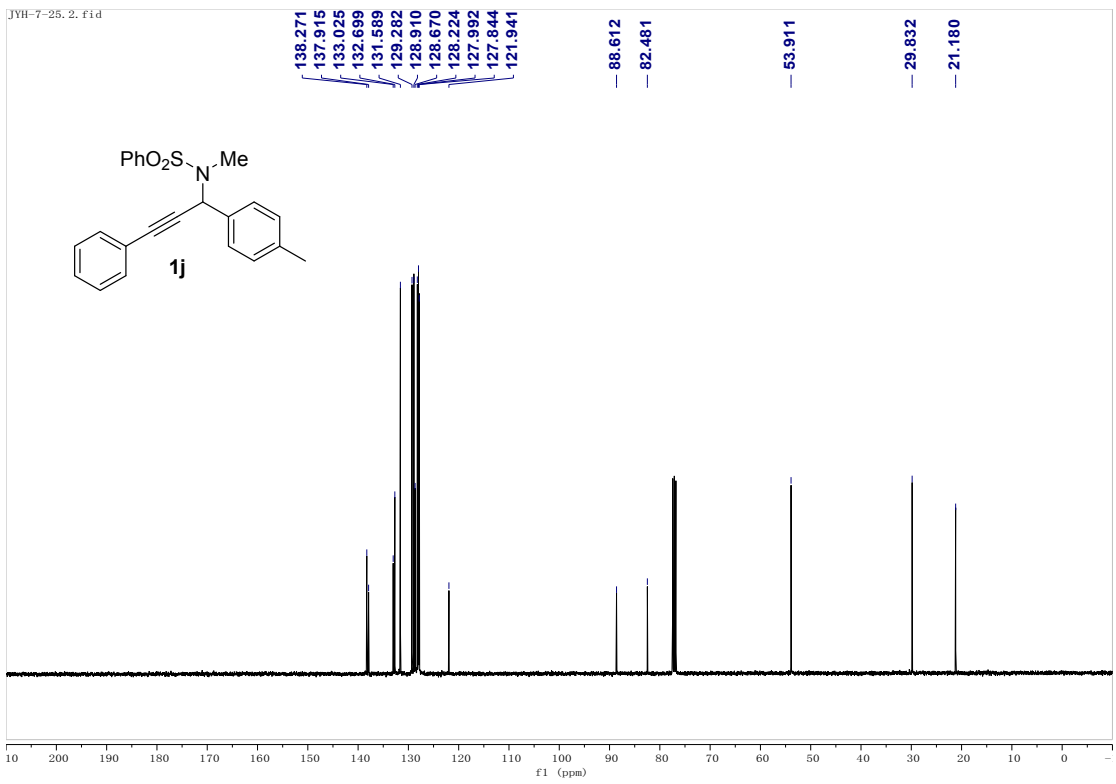

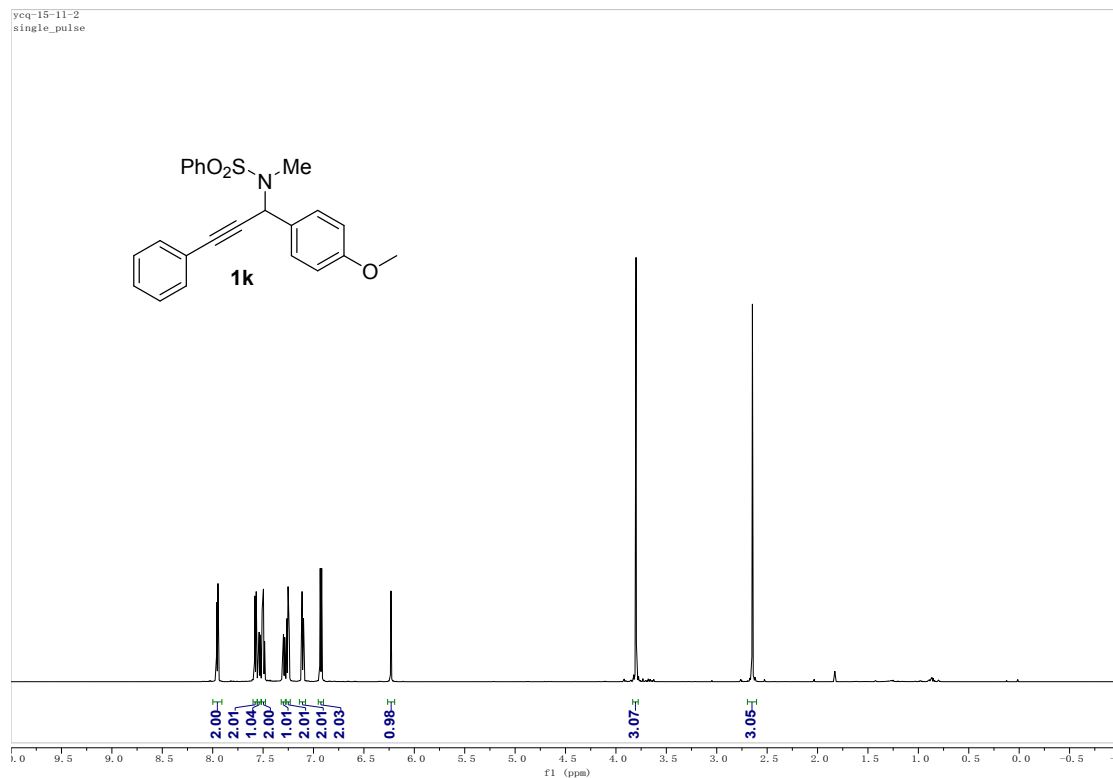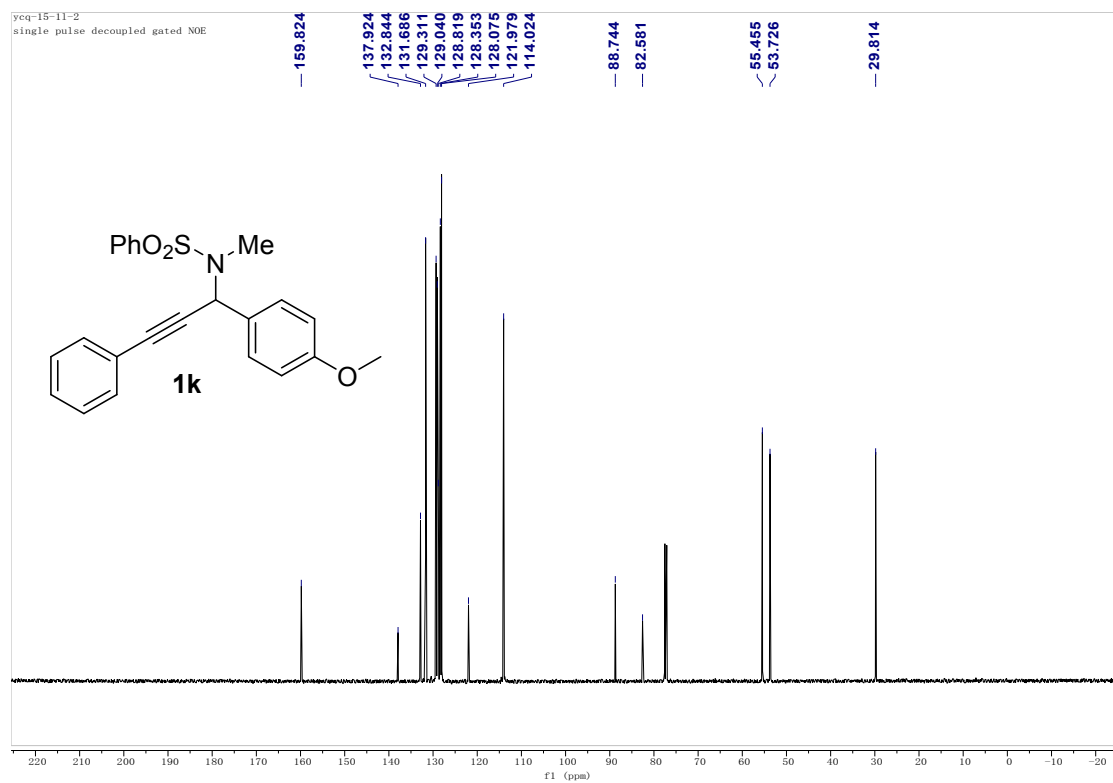



JYH-7-86-1PC.1.fid

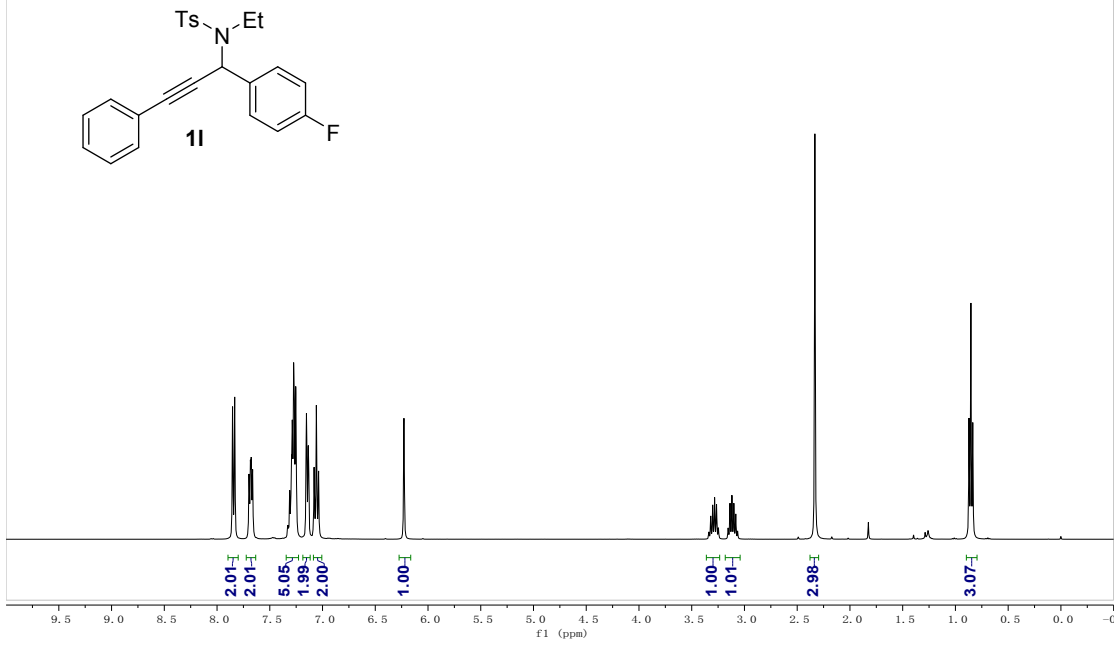

JYH-7-86-1PC.3.fid

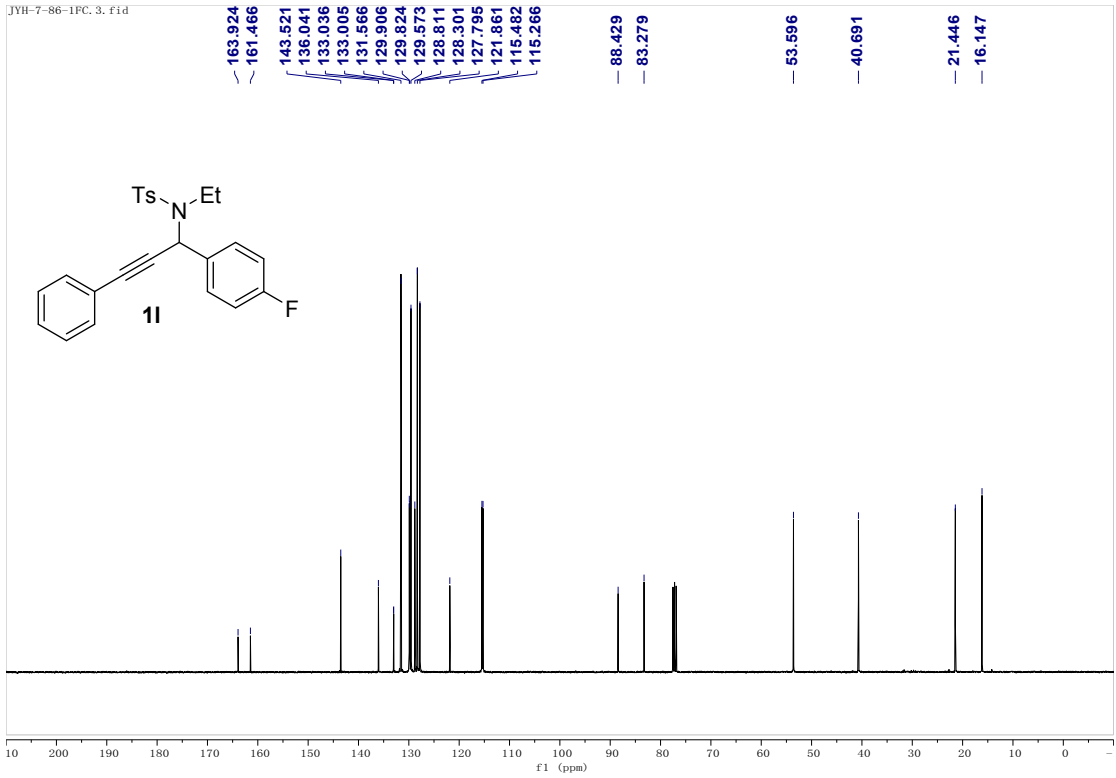

JYH-7-90-1  
single\_pulse

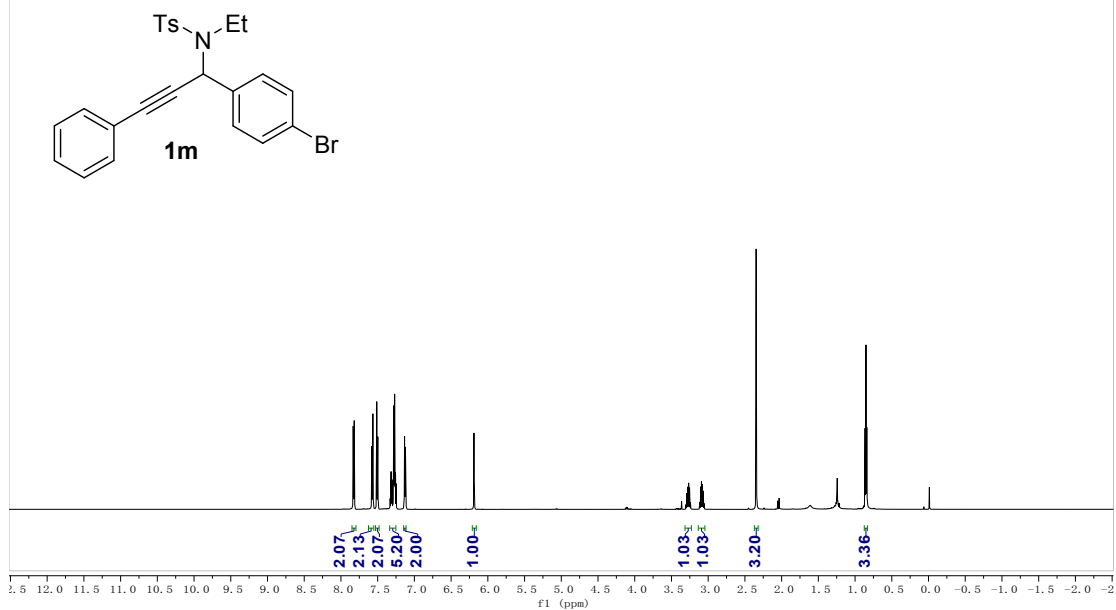

JYH-7-90-1  
single\_pulse decoupled gated NOE

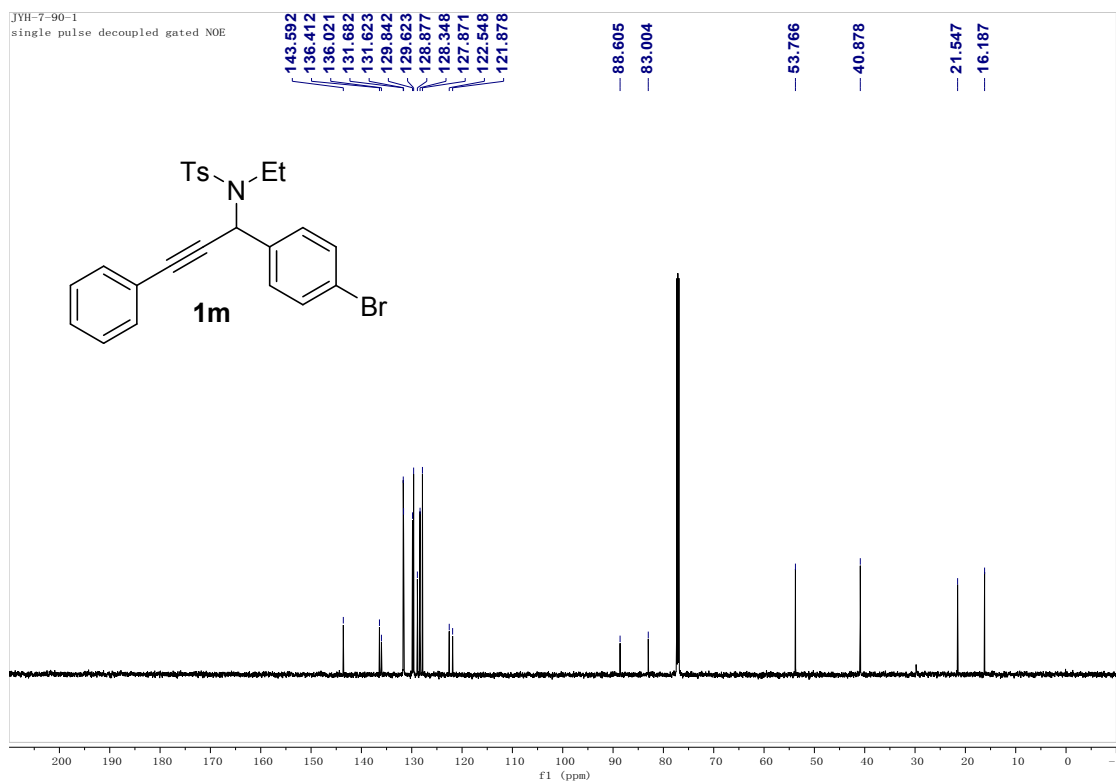

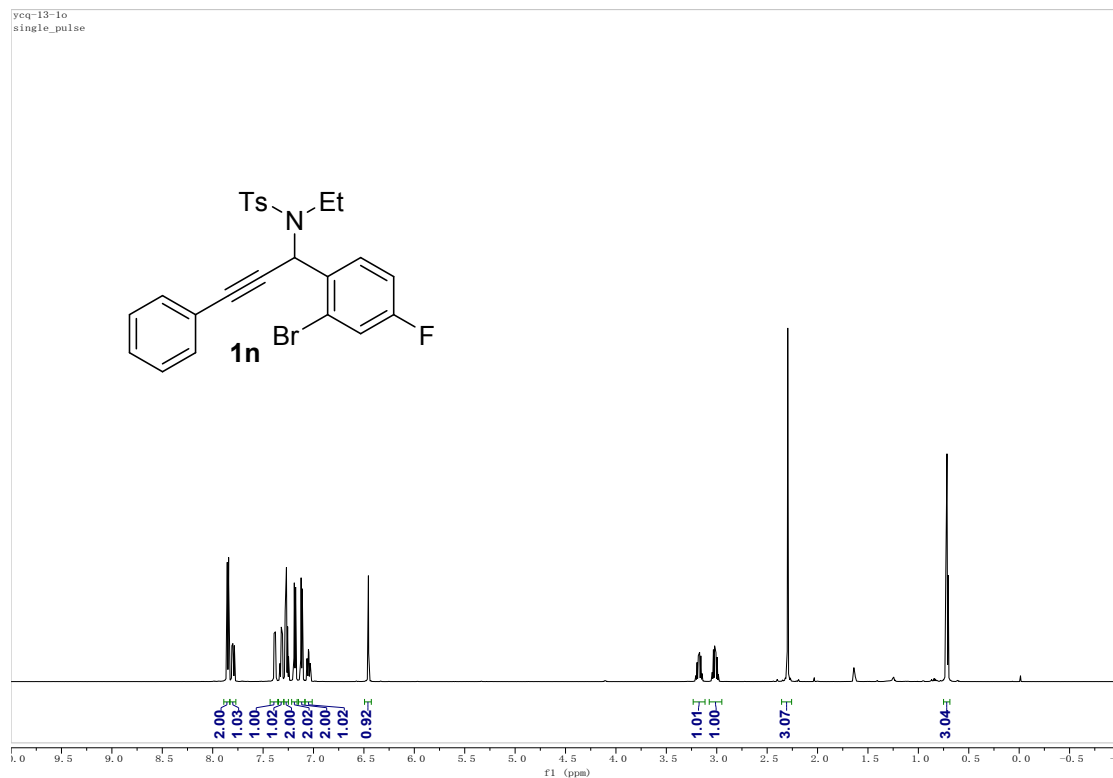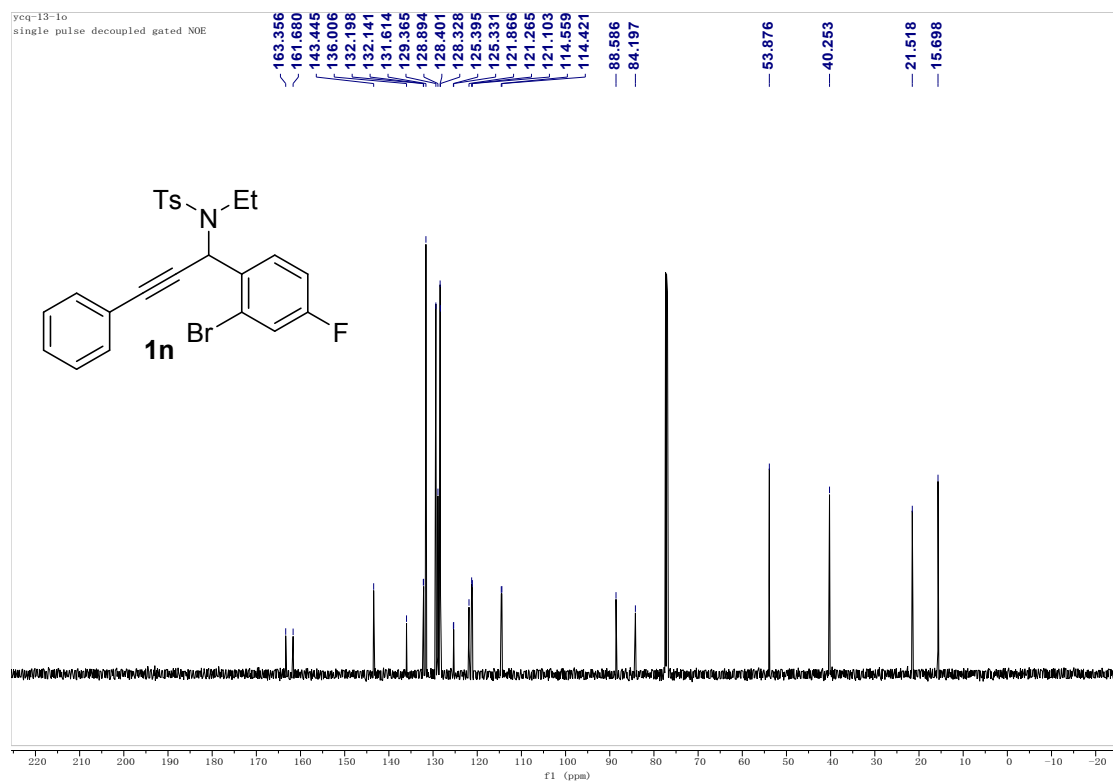

JYH-7-86-2HHC.1.fid

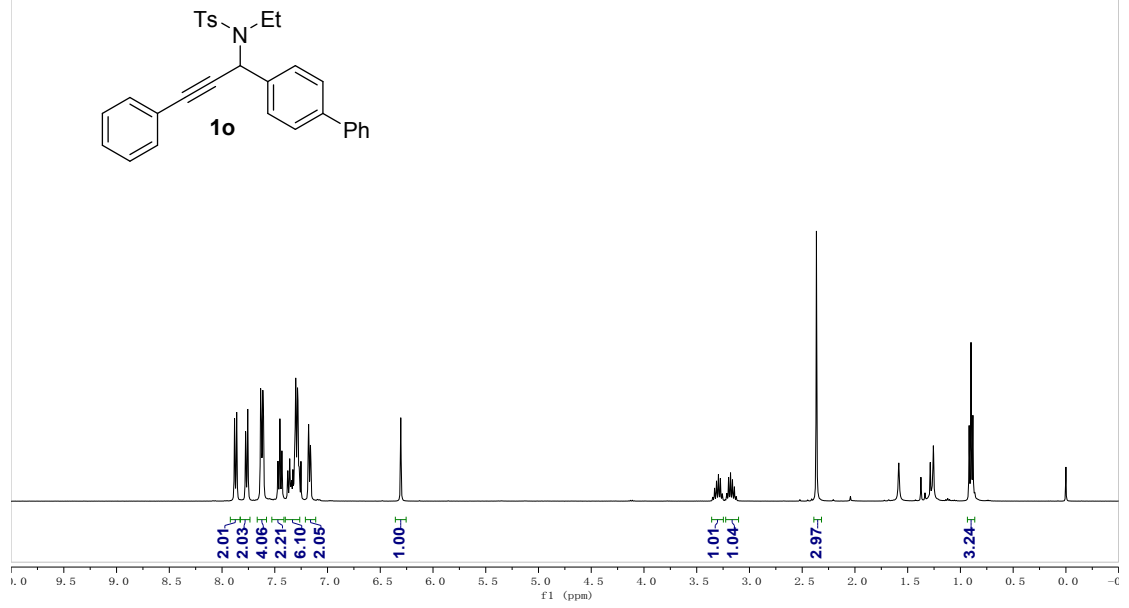

JYH-7-86-2HHC.2.fid

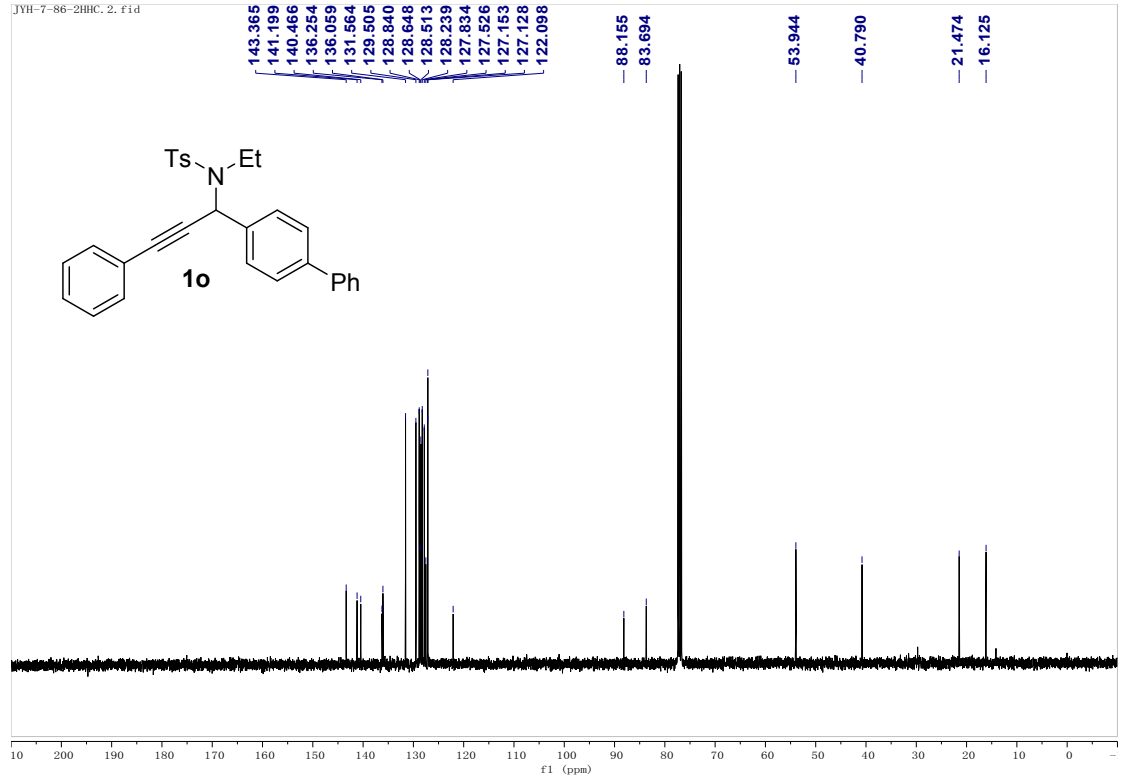

JYH-7-66  
single\_pulse

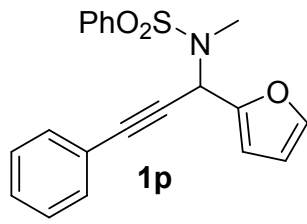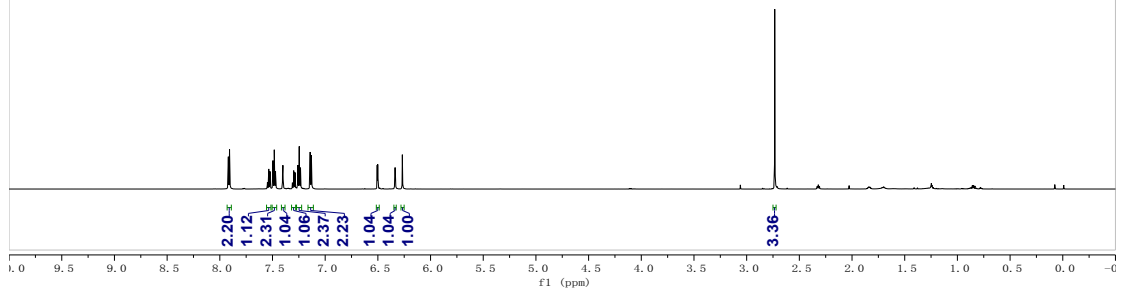

JYH-7-66  
single\_pulse decoupled

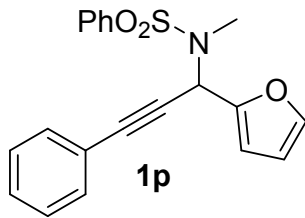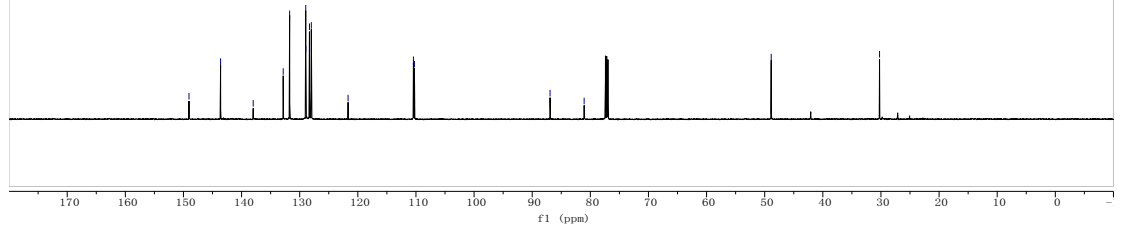

ycq-13-11  
single\_pulse

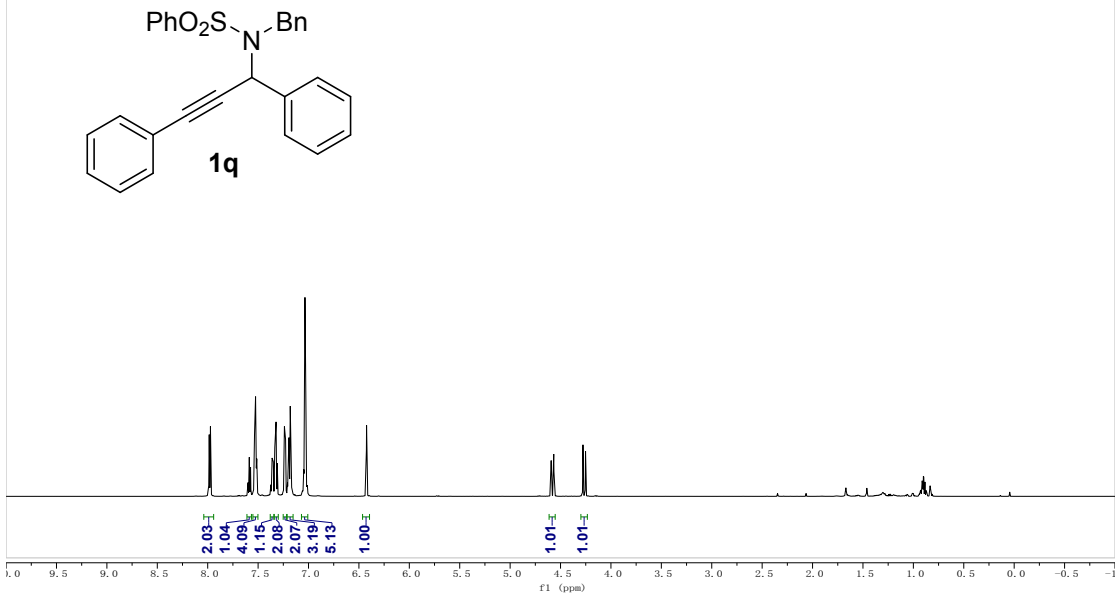

ycq-13-11  
single pulse decoupled gated NOE

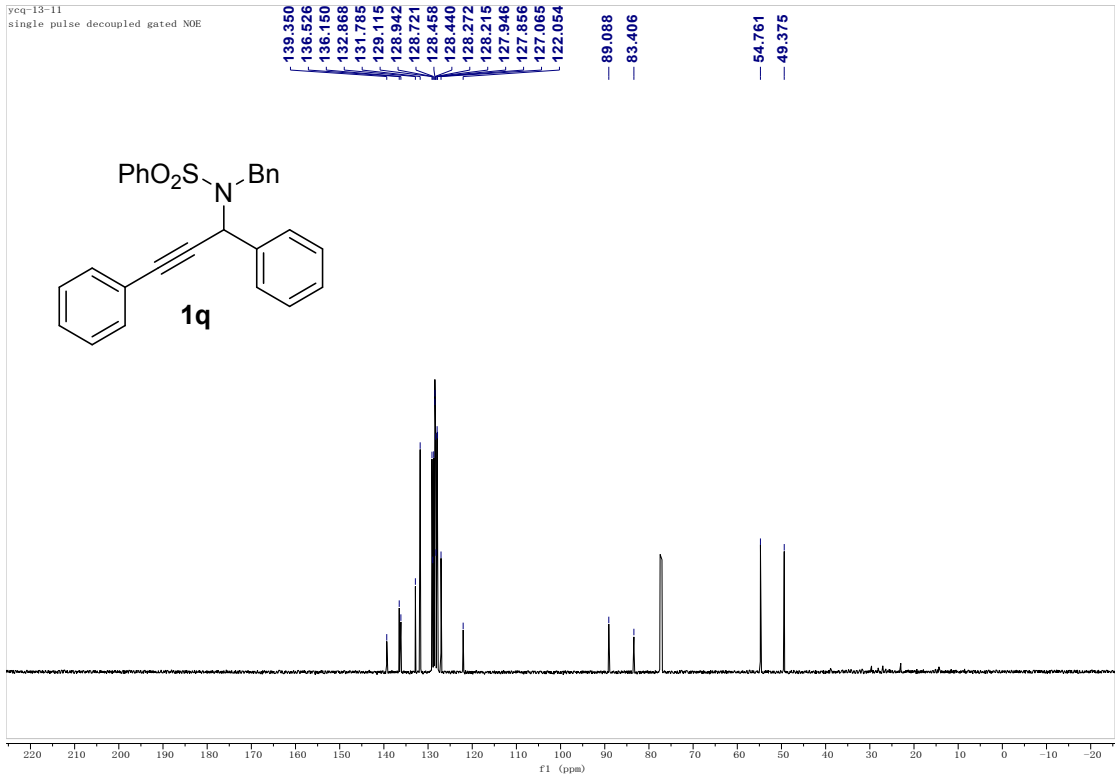

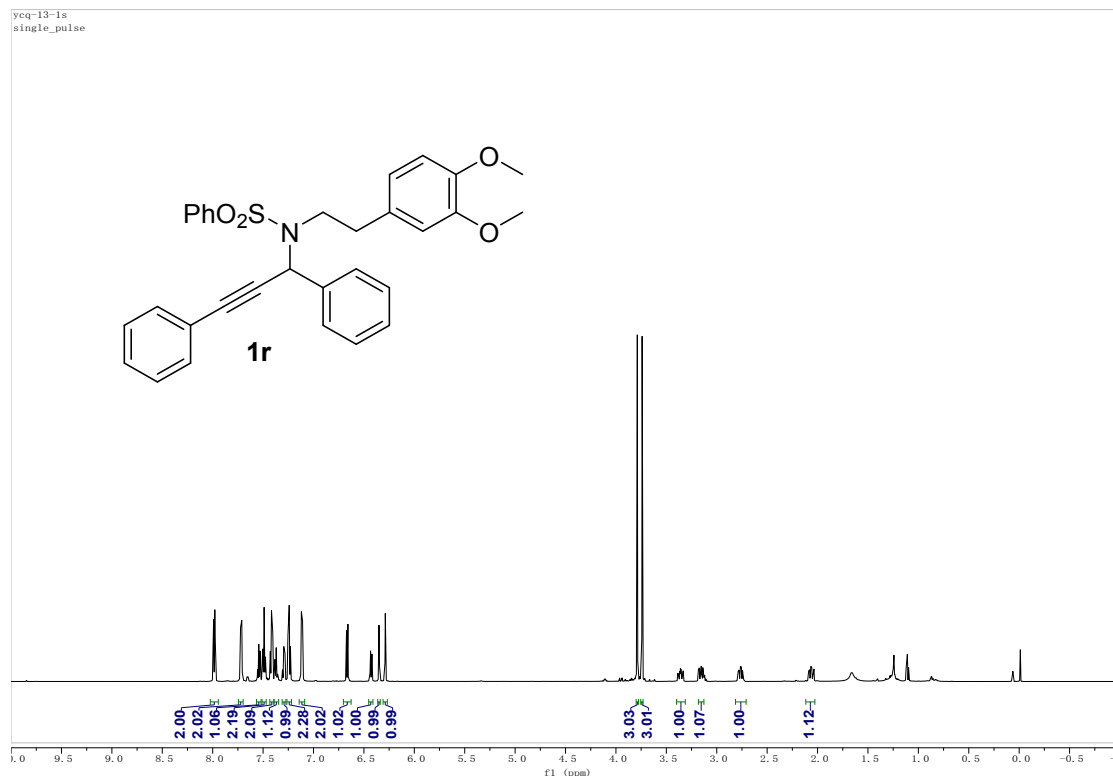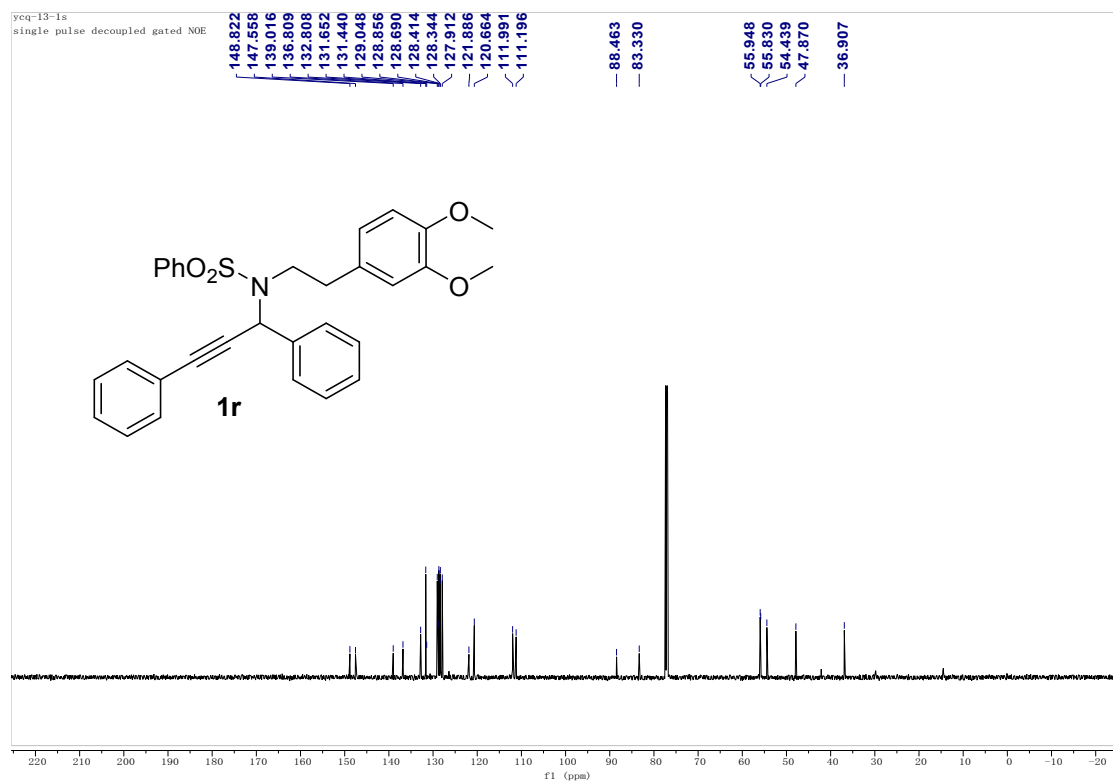

yeq-12-100-1.1.fid

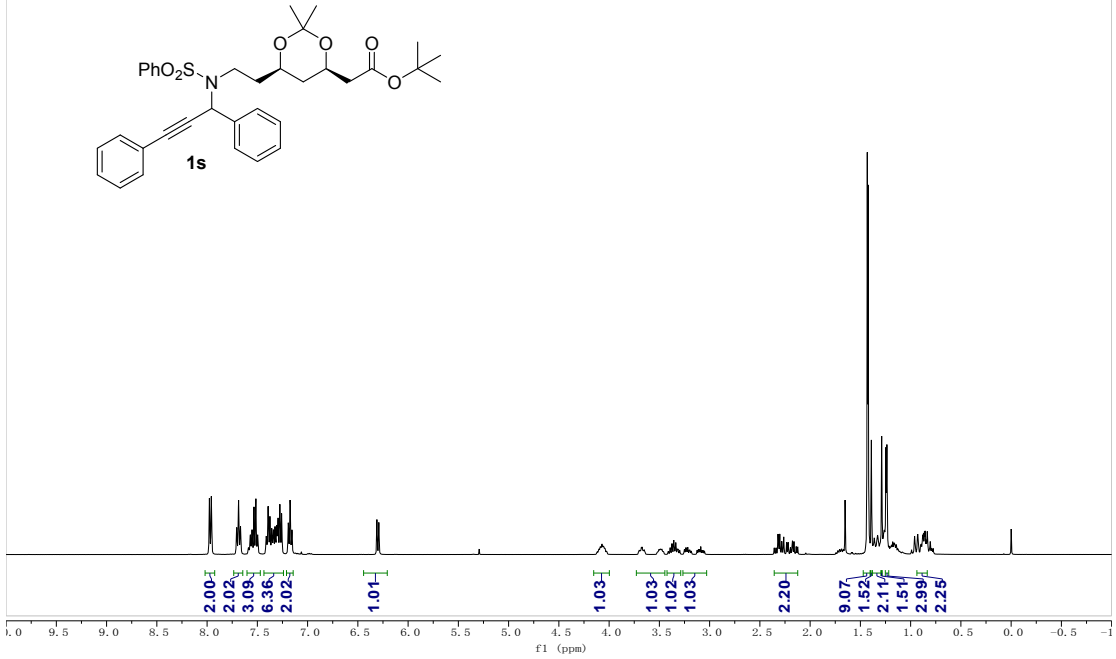

yeq-12-100-1.2.fid

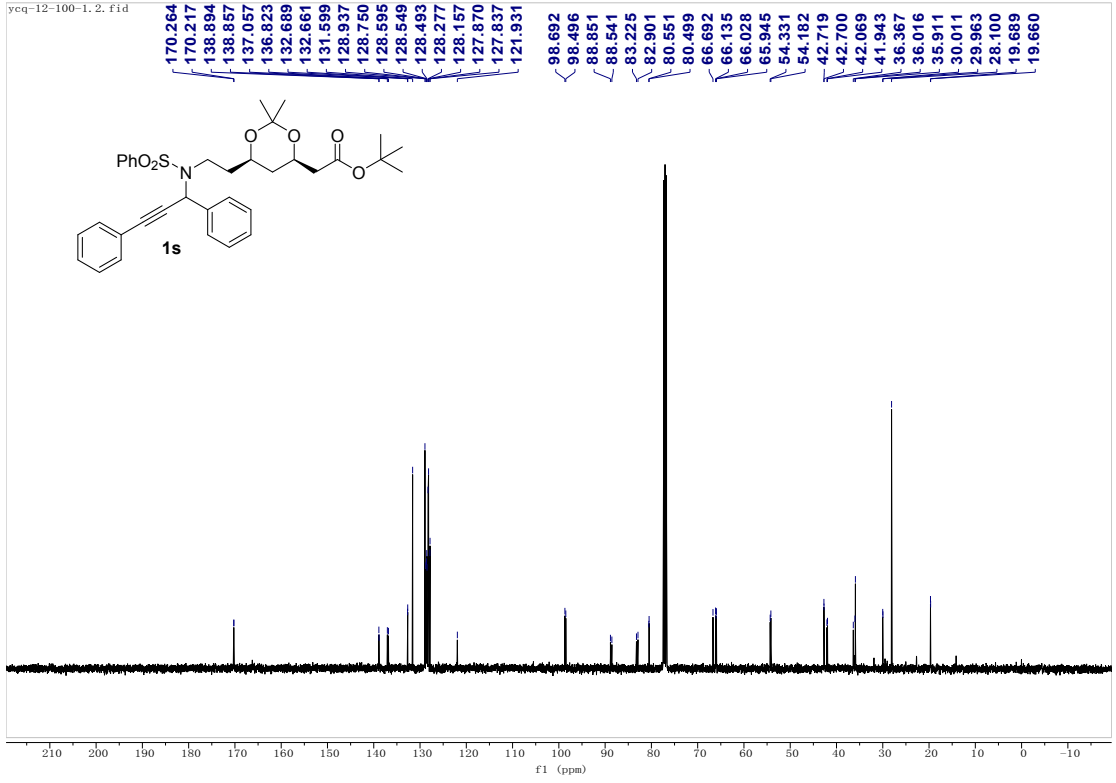



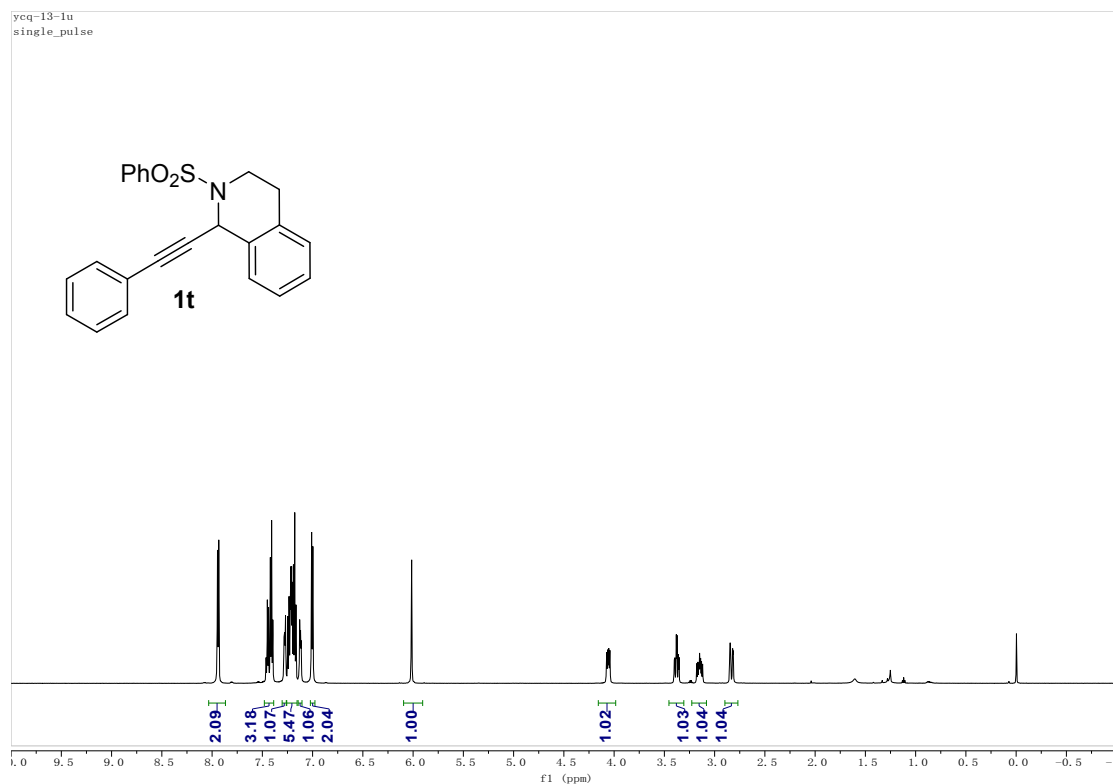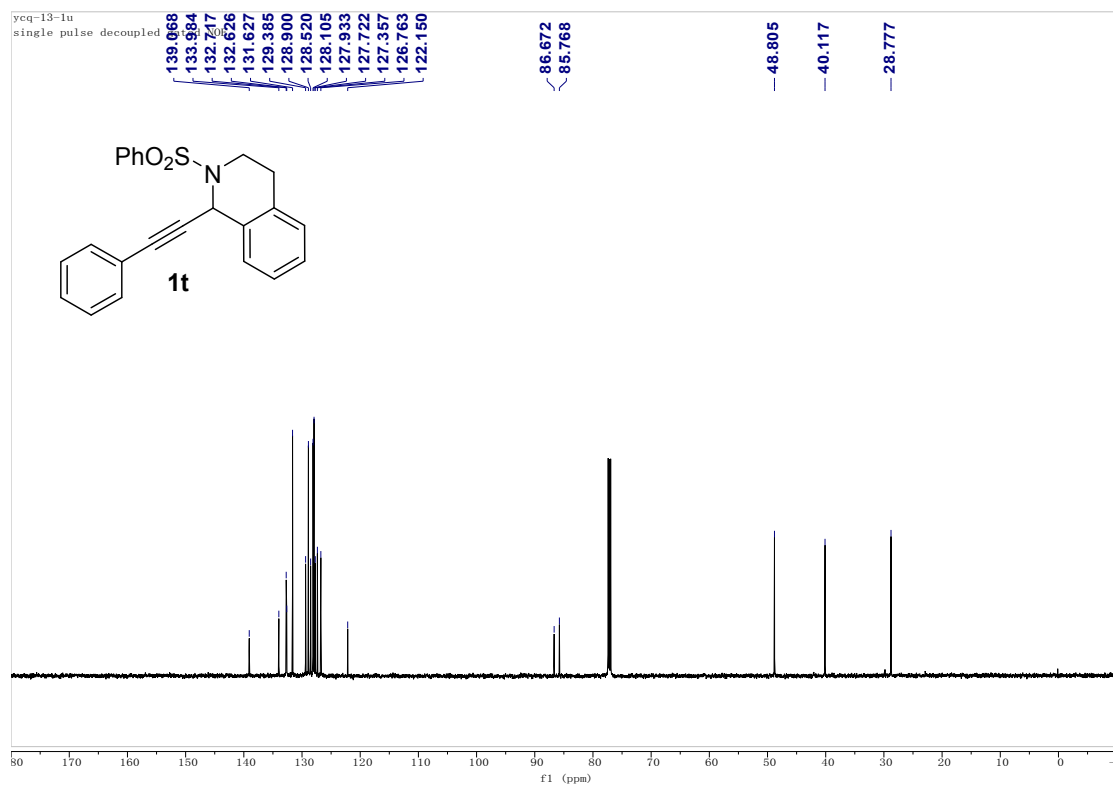

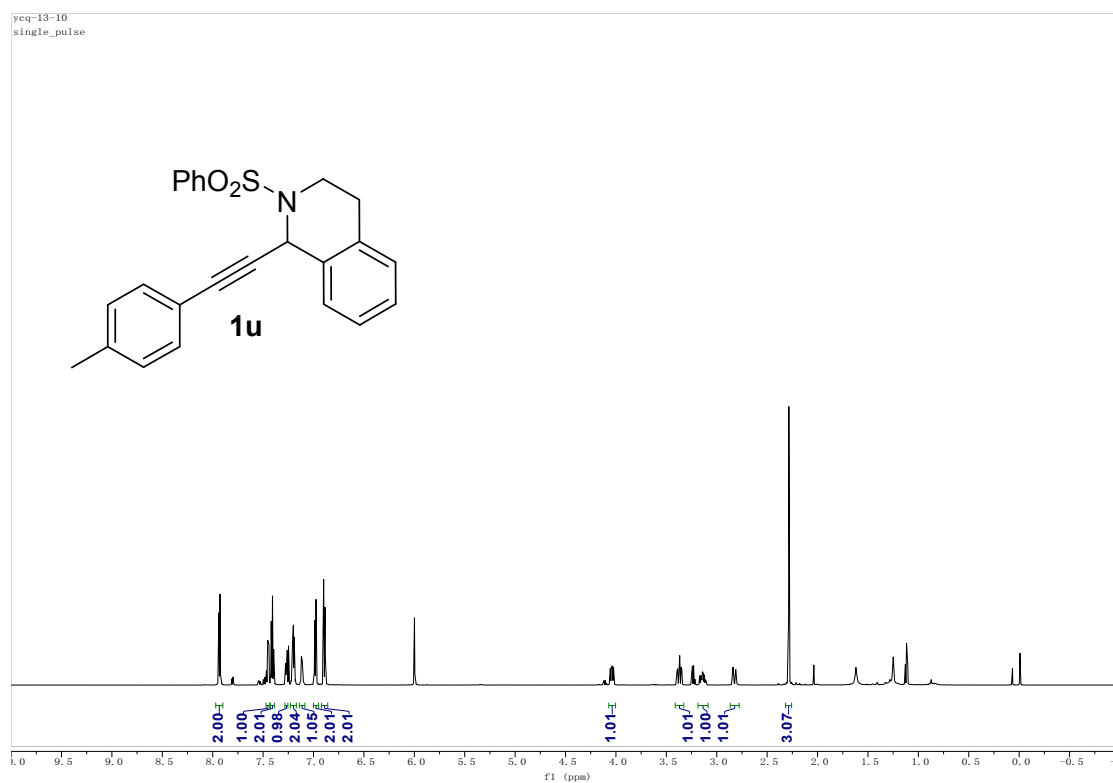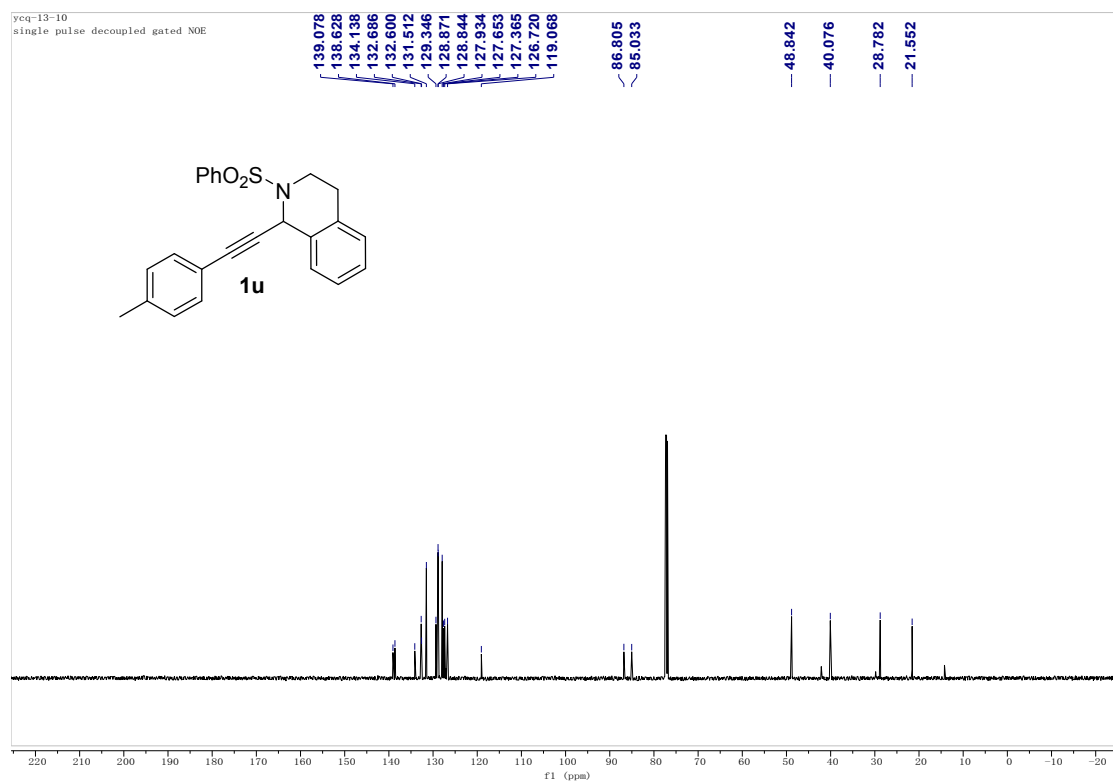

ycq-12-112-1  
single\_pulse

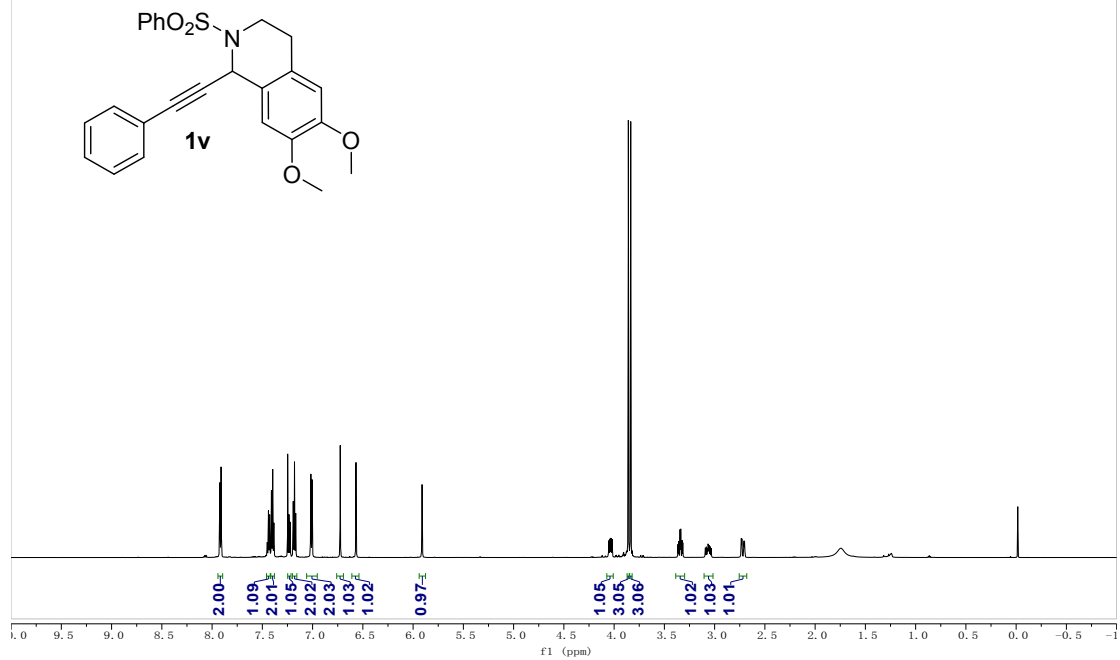

ycq-12-112-1  
single\_pulse decoupled

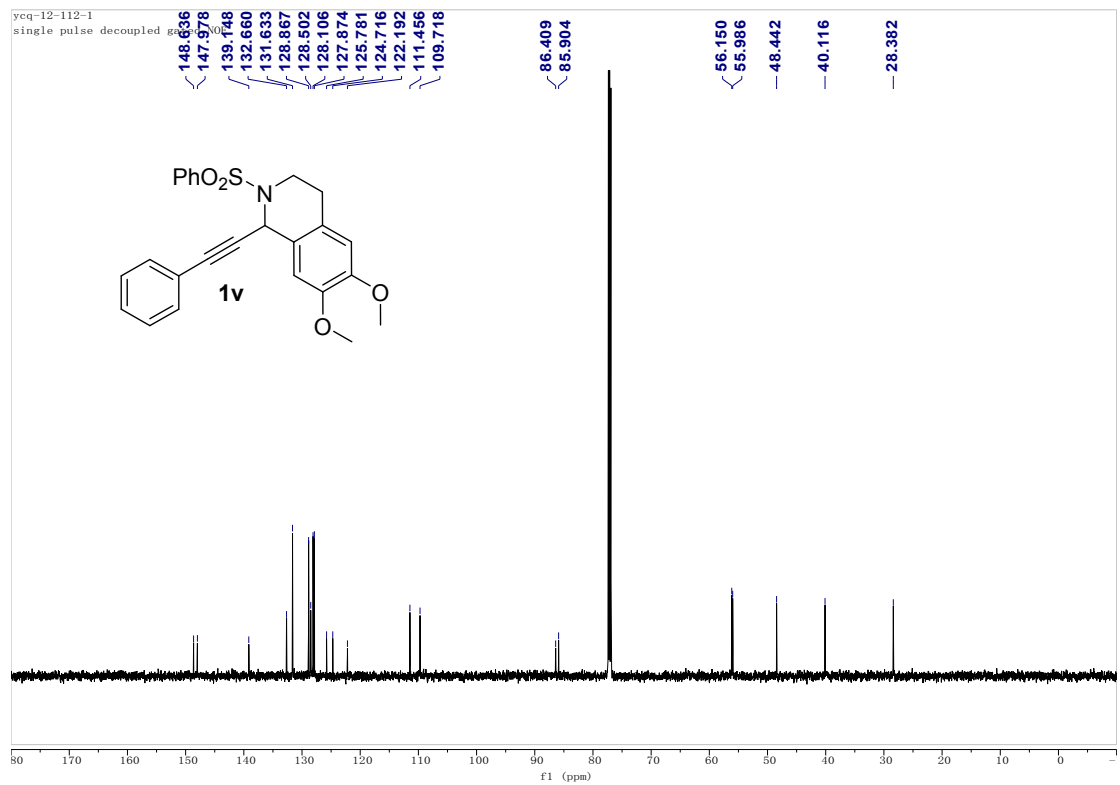

ycq-13-12  
single\_pulse

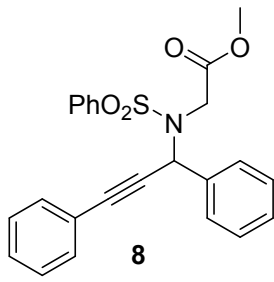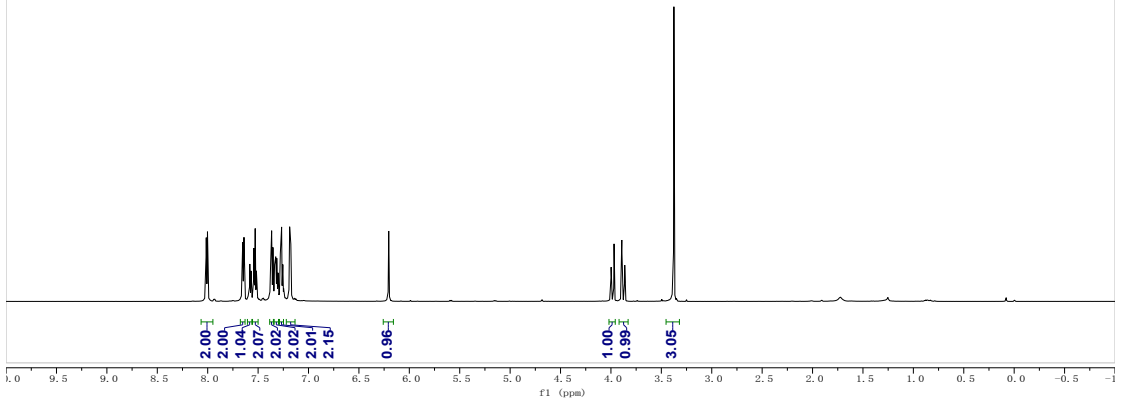

ycq-13-12  
single\_pulse decouple

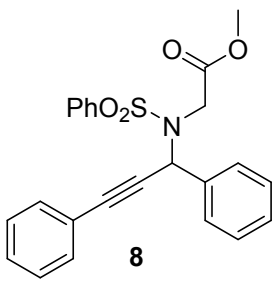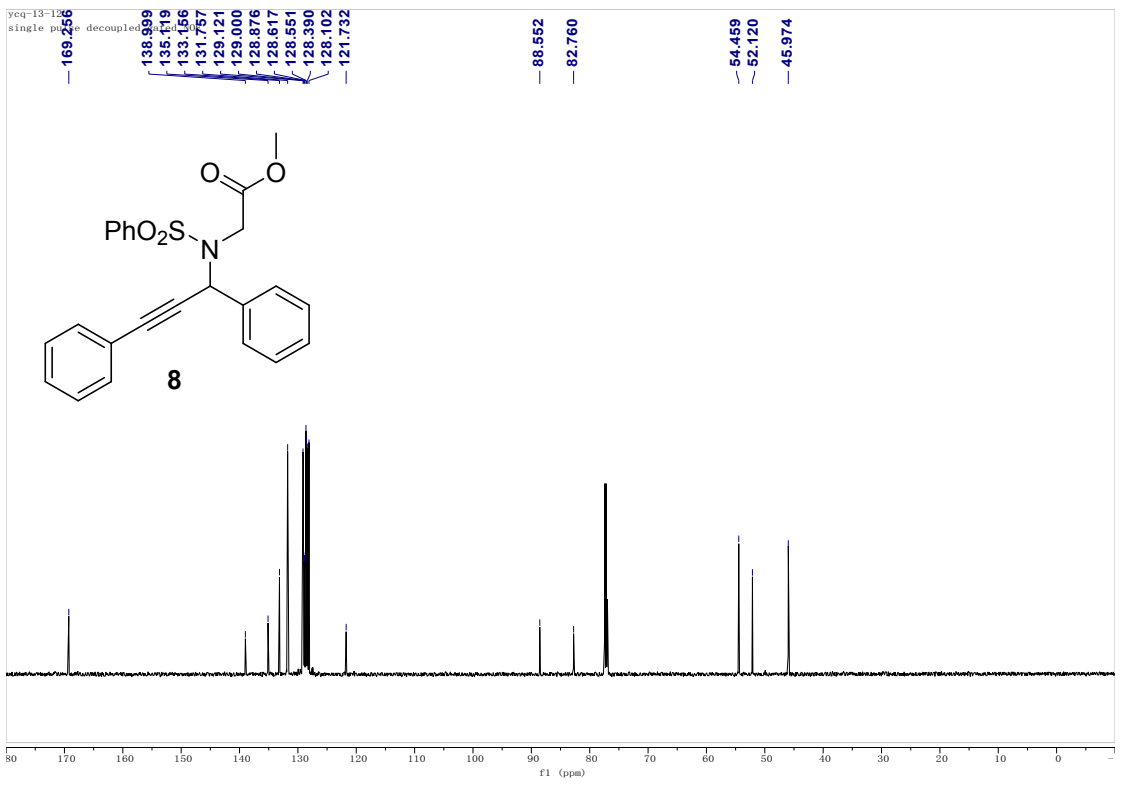

ycq-13-76-1.1.fid

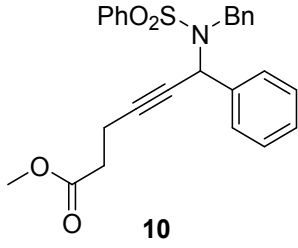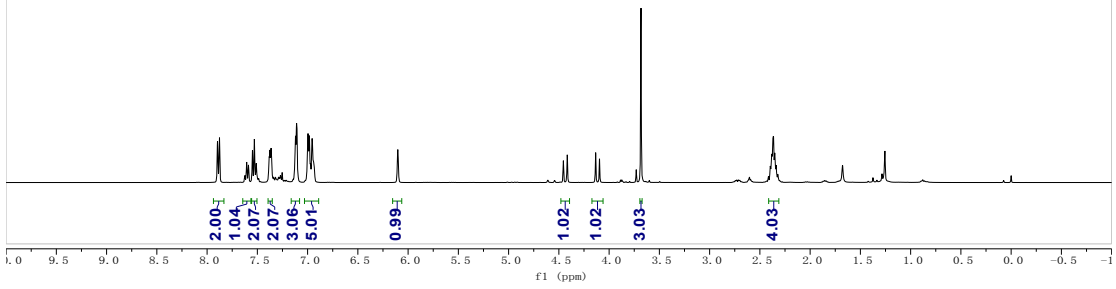

ycq-13-76-1.2.fid

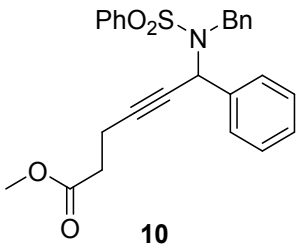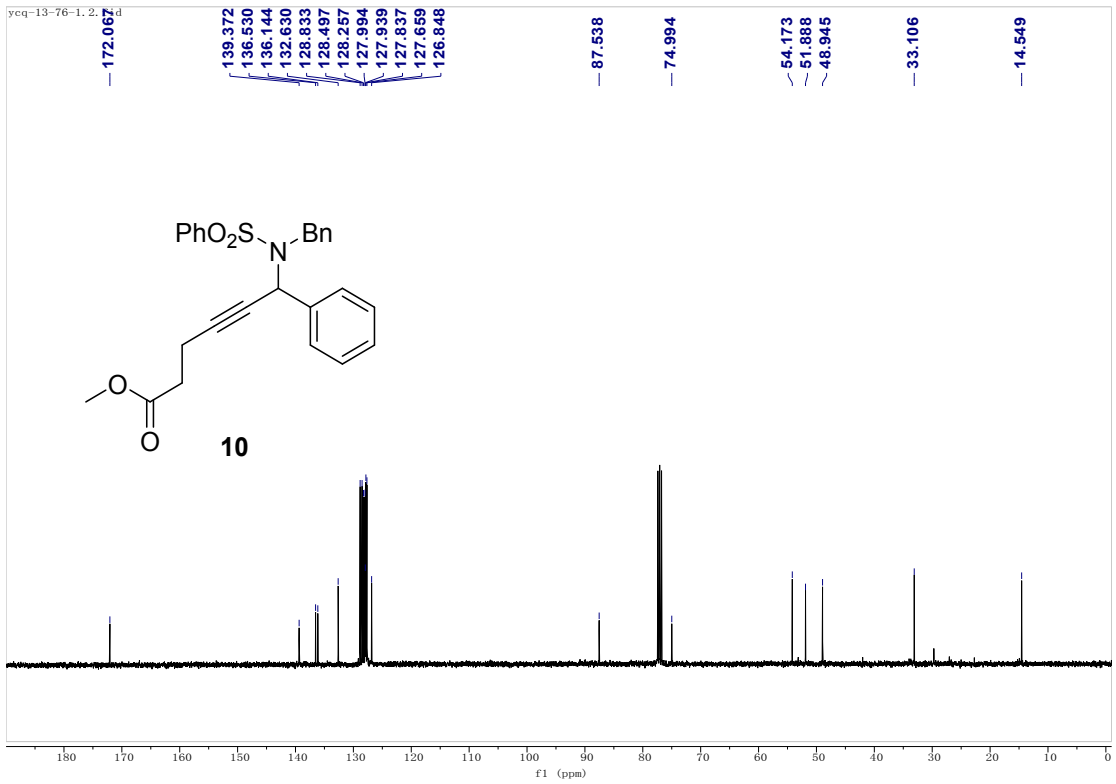

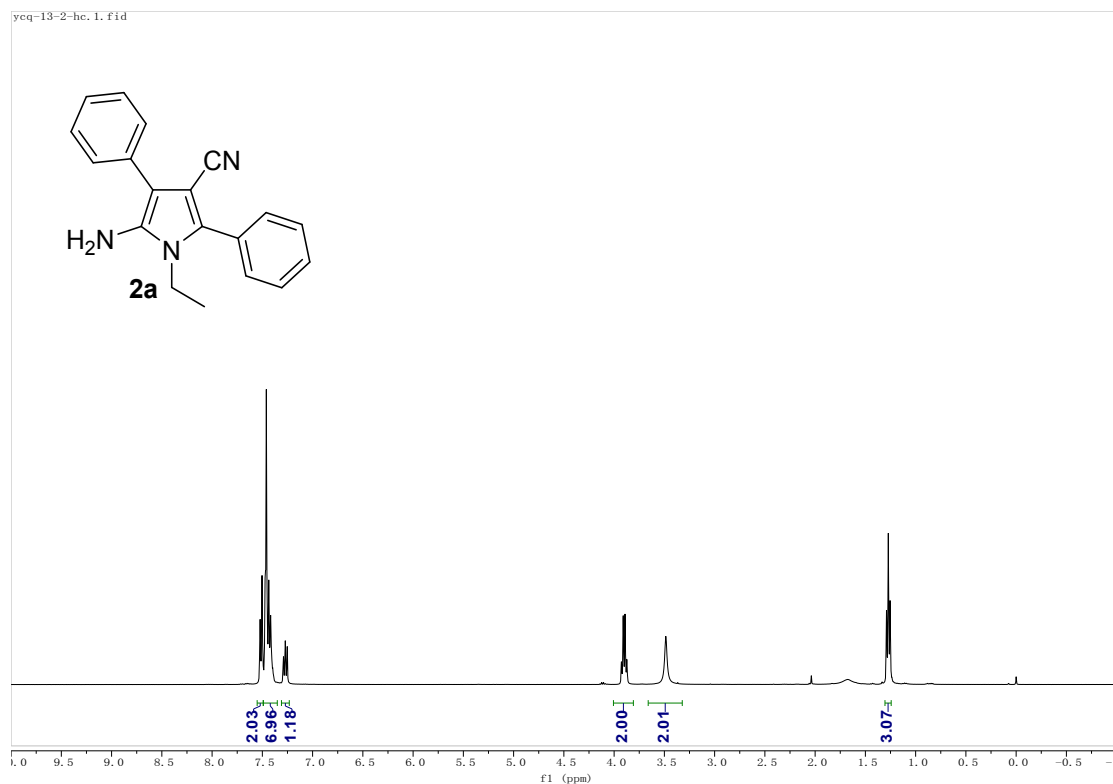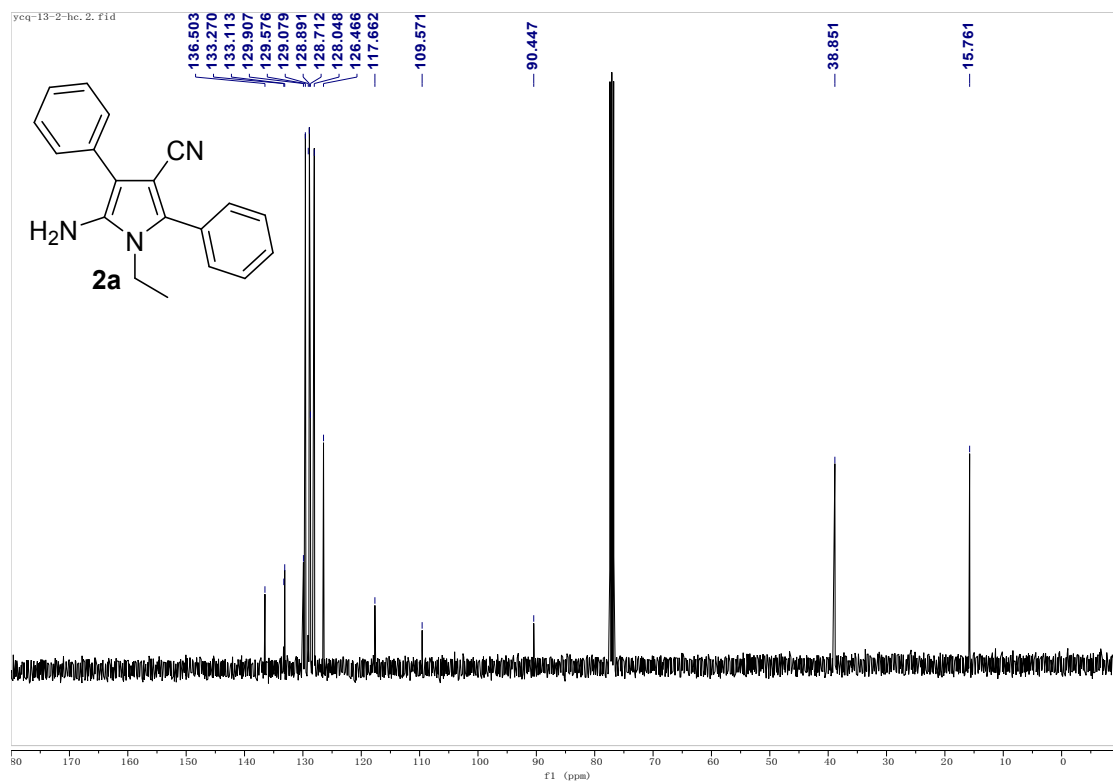

JYH-6-108HC.1.fid

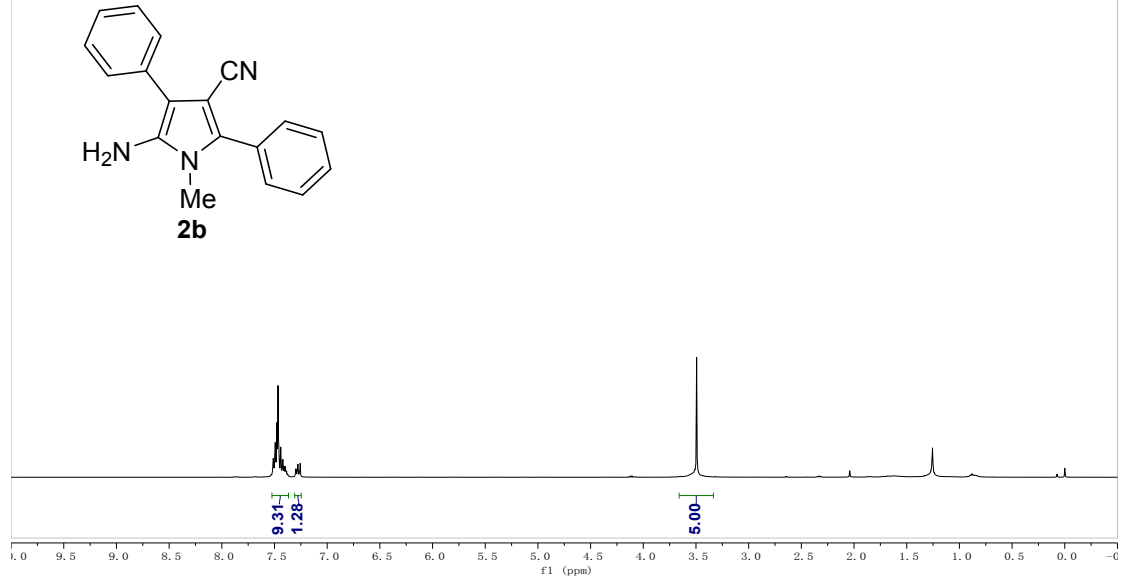

JYH-6-108HC.2.fid

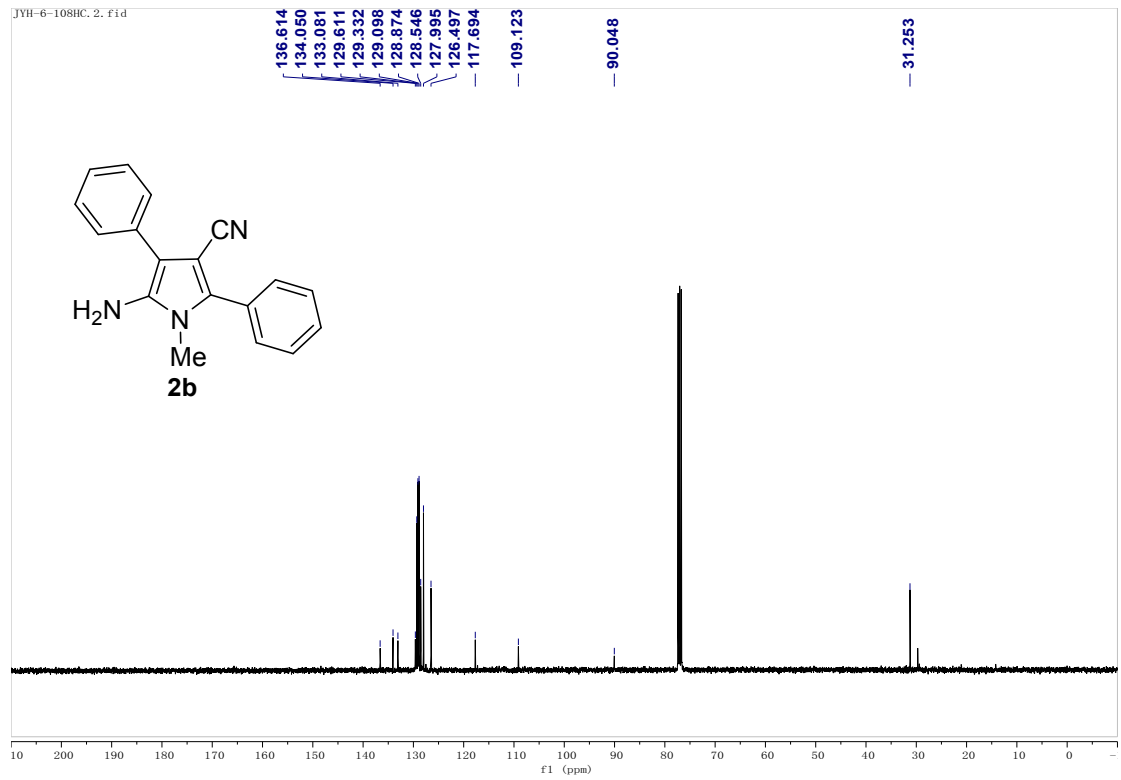

JYH-7-72-H-C  
single\_pulse

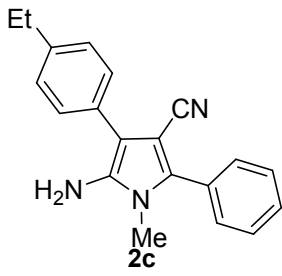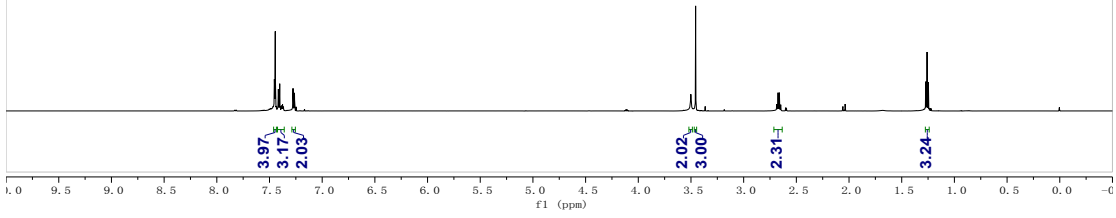

JYH-7-72-H-C  
single\_pulse decoupled gated NOE

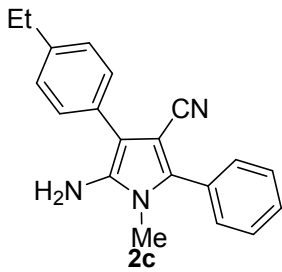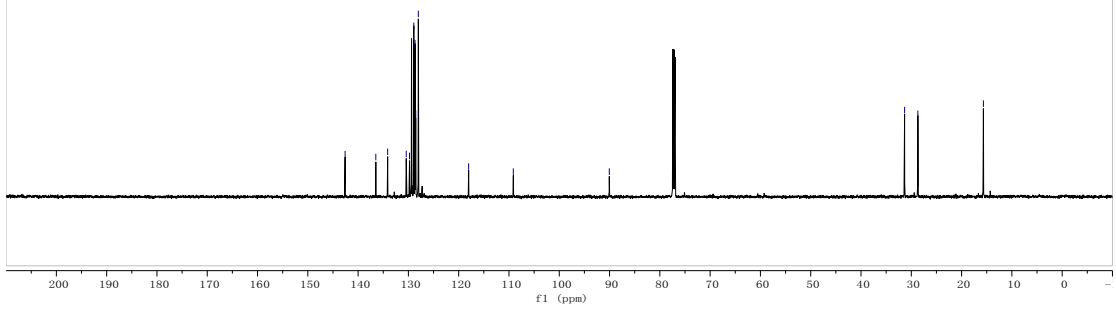



JYH-7-50  
single\_pulse

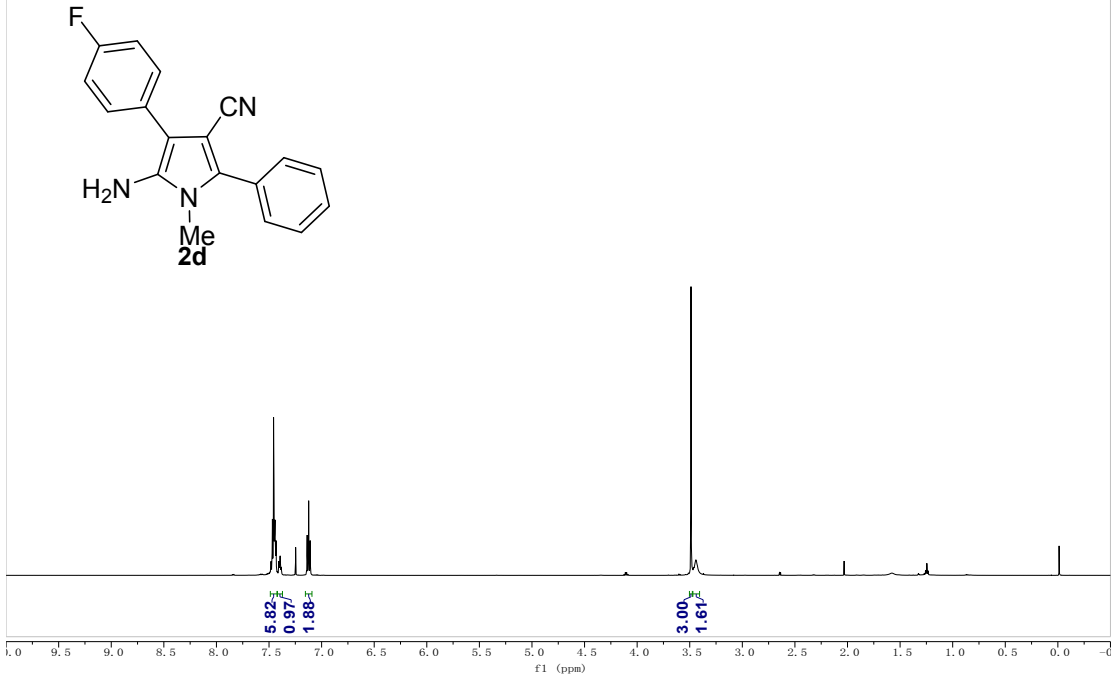

JYH-7-50-FC: 3. f1d

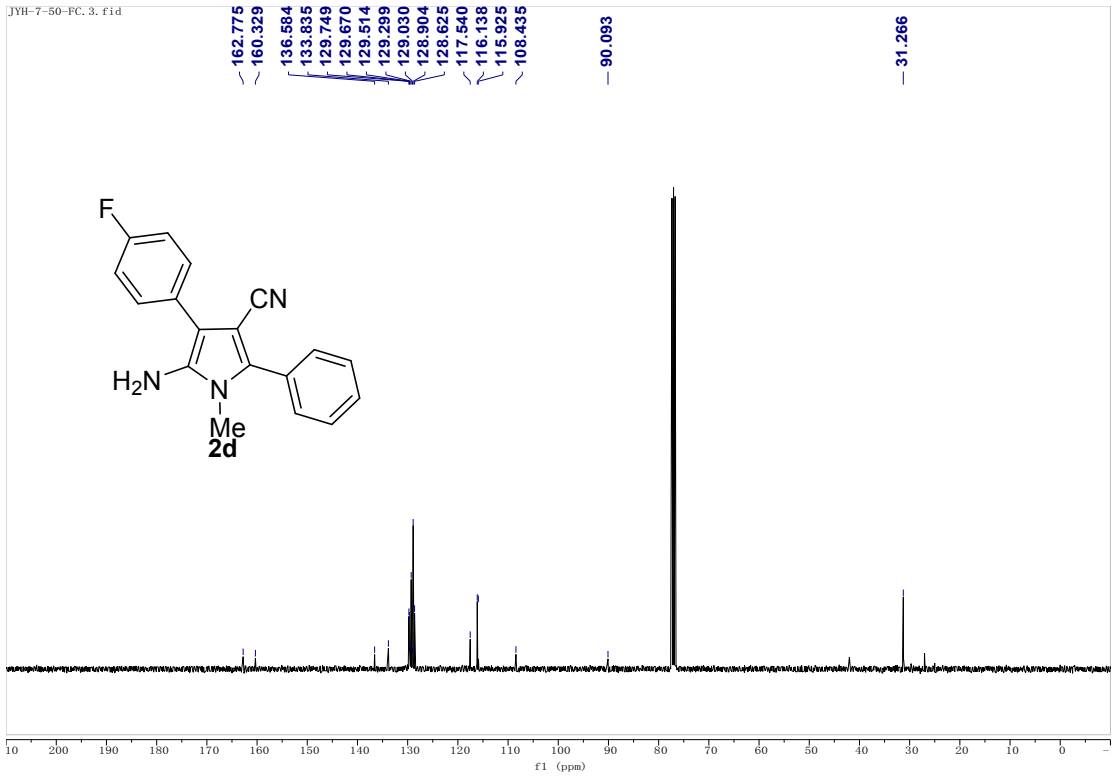

JYH-7-78-1-HC  
single\_pulse

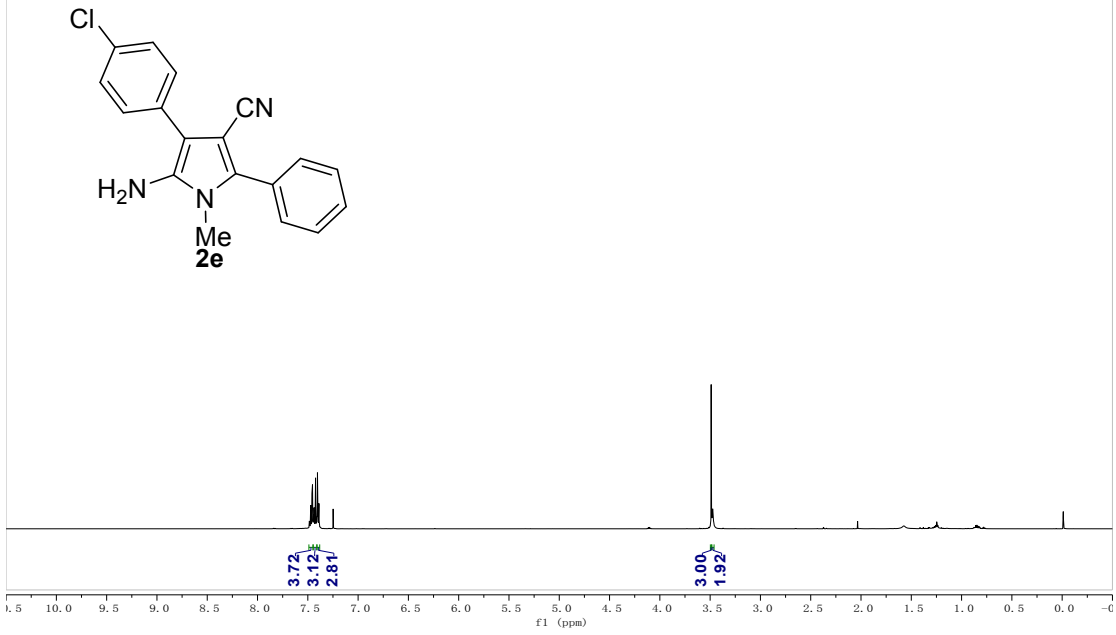

JYH-7-78-1-HC  
single\_pulse decoupled gated NOE

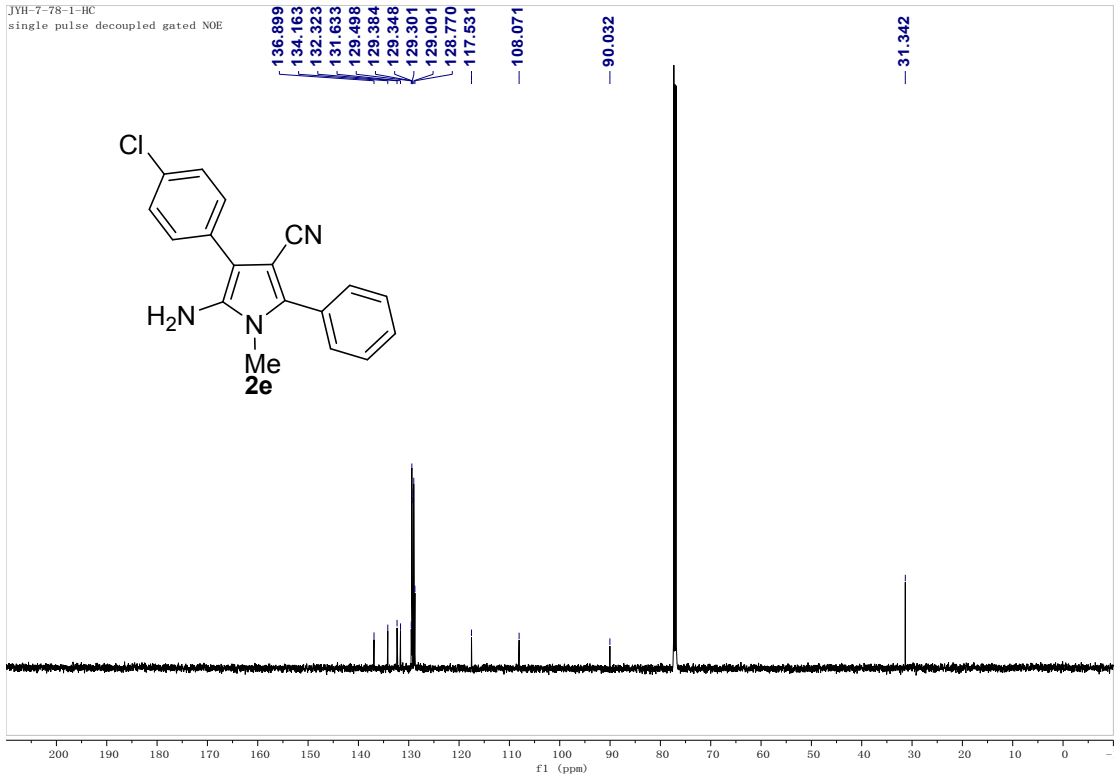

JYH-7-84-2-H  
single\_pulse

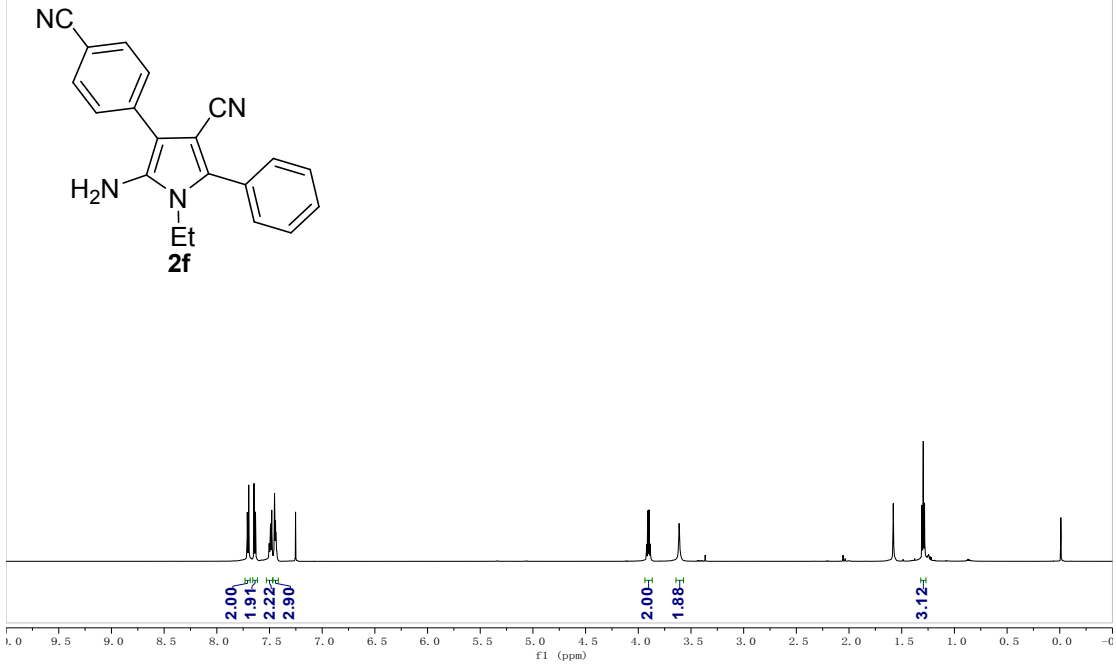

JYH-7-84-2  
single\_pulse decoupled gated NOE

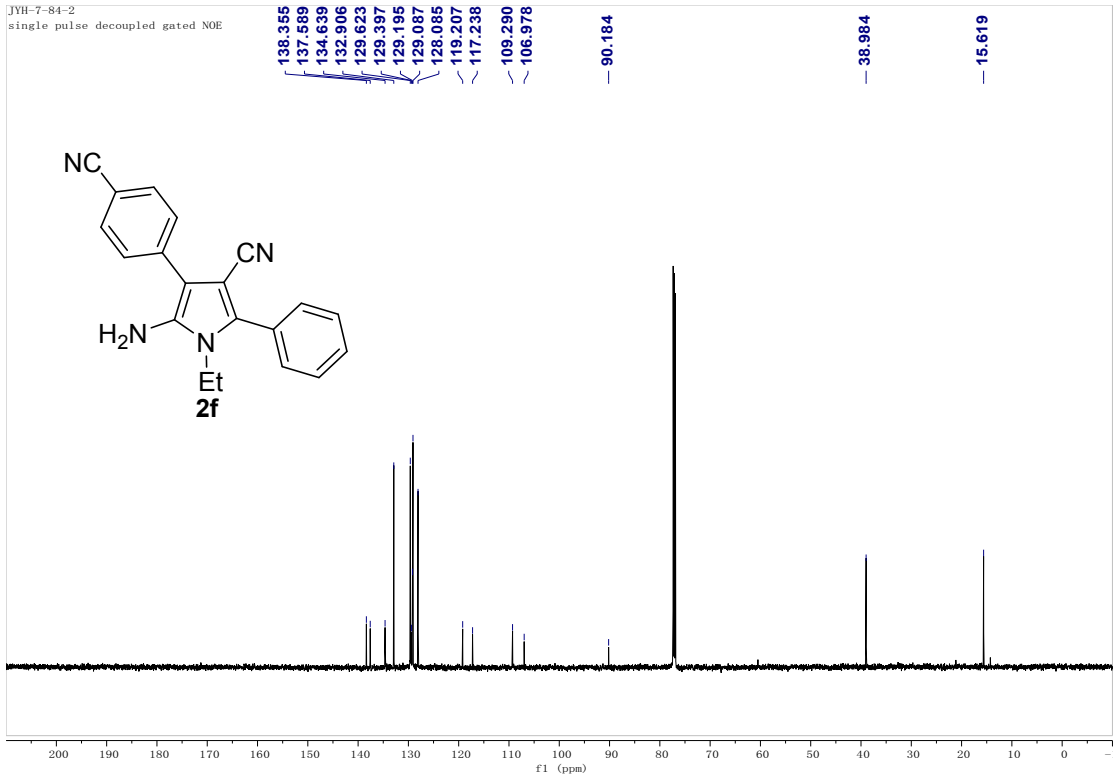

JYH-7-94-2HC  
single\_pulse

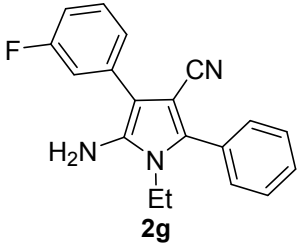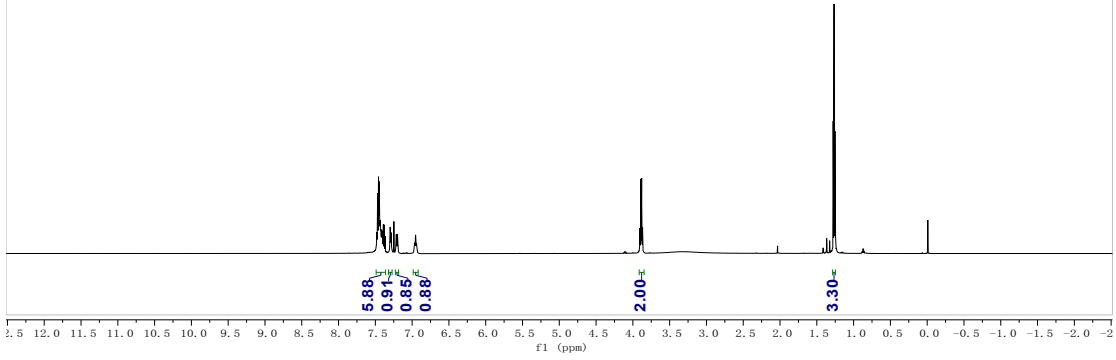

JYH-7-94-2HC  
single\_pulse decoupled gated NOE

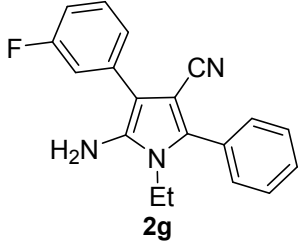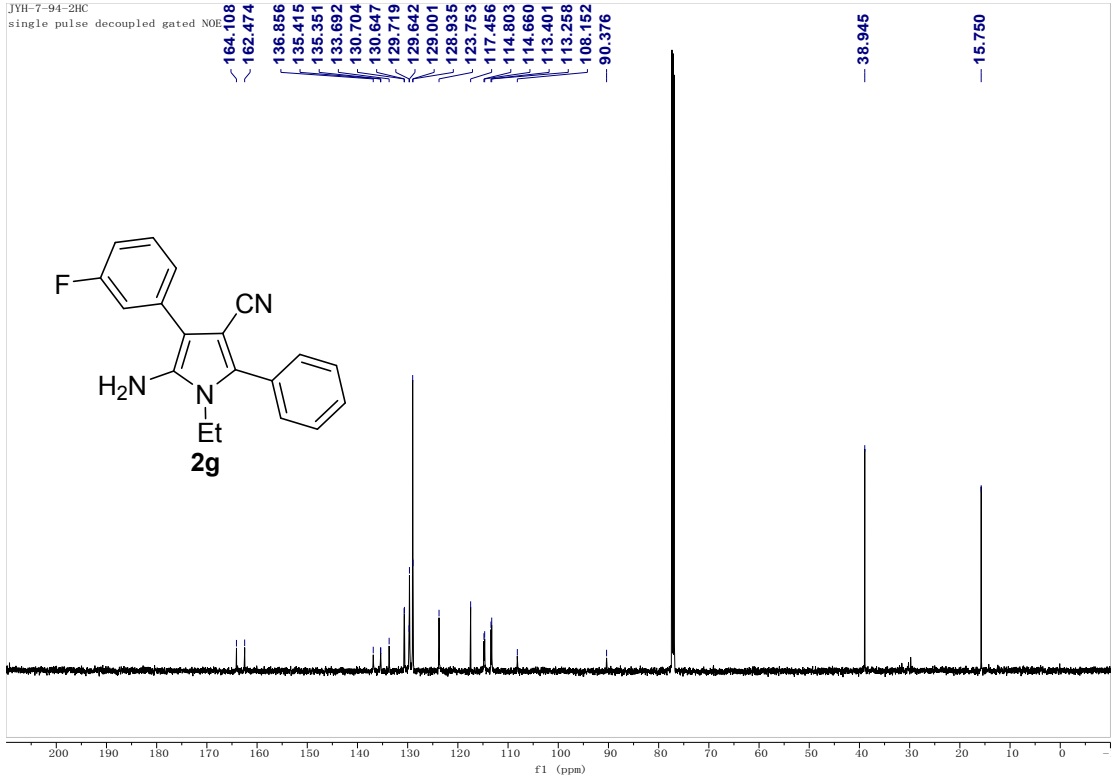

JYH-7-94-1HC  
single\_pulse

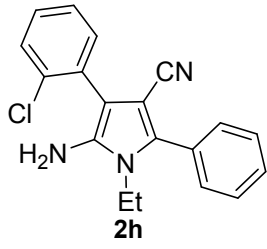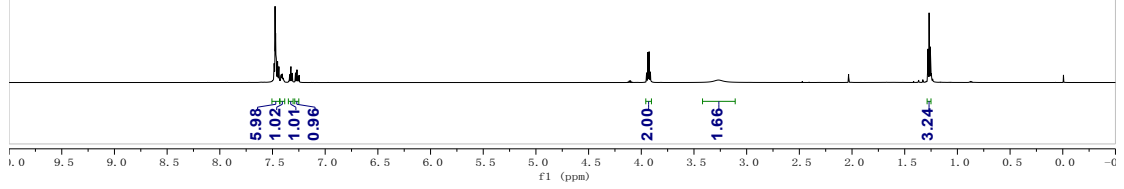

JYH-7-94-1HC  
single\_pulse decoupled gated NOE

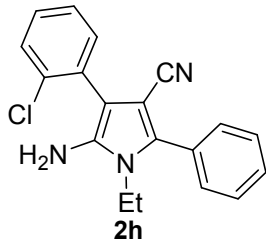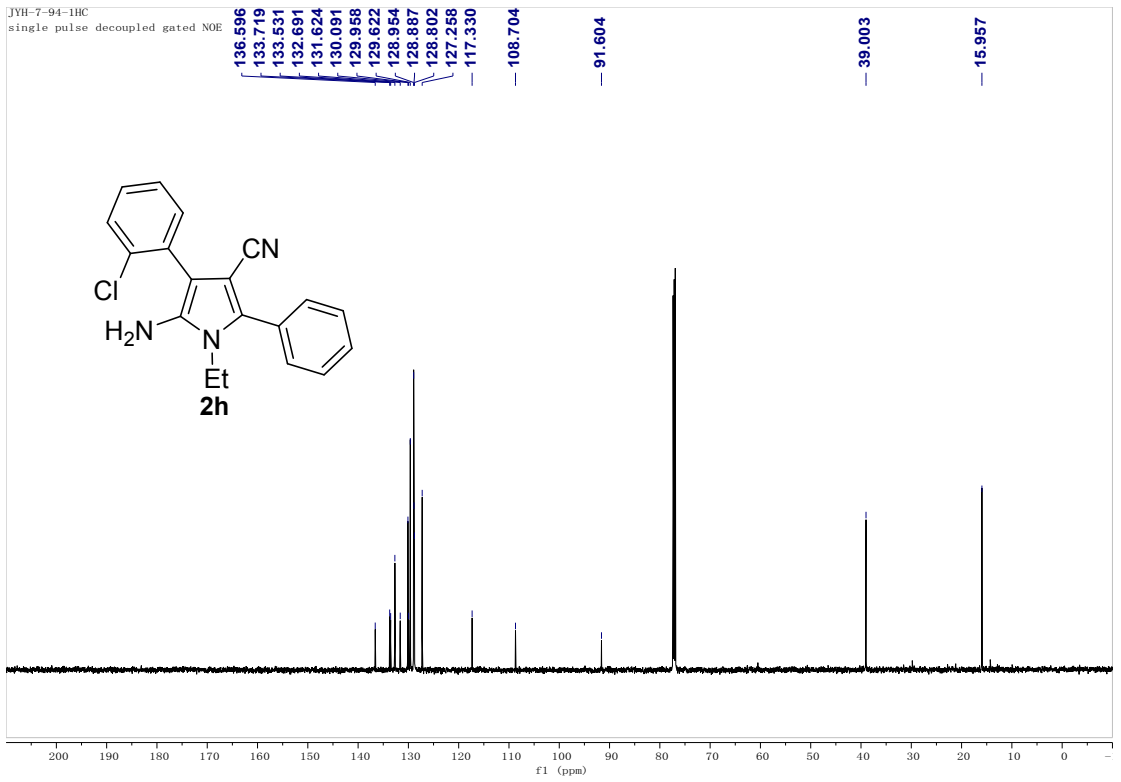

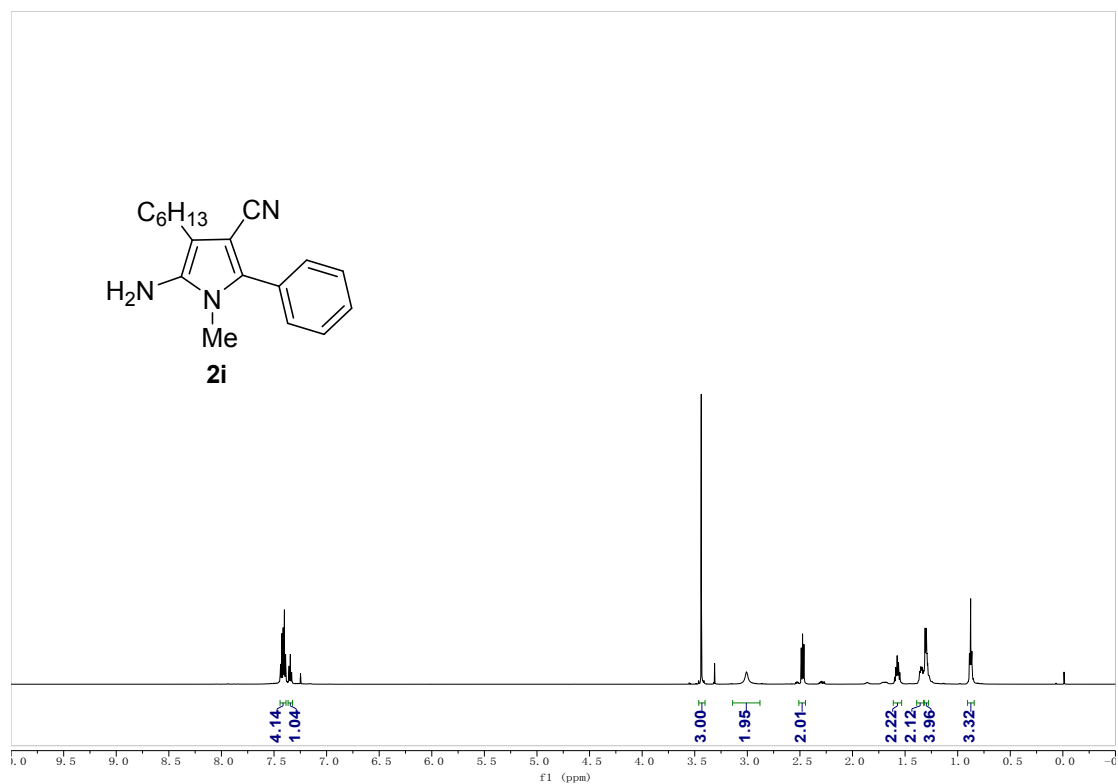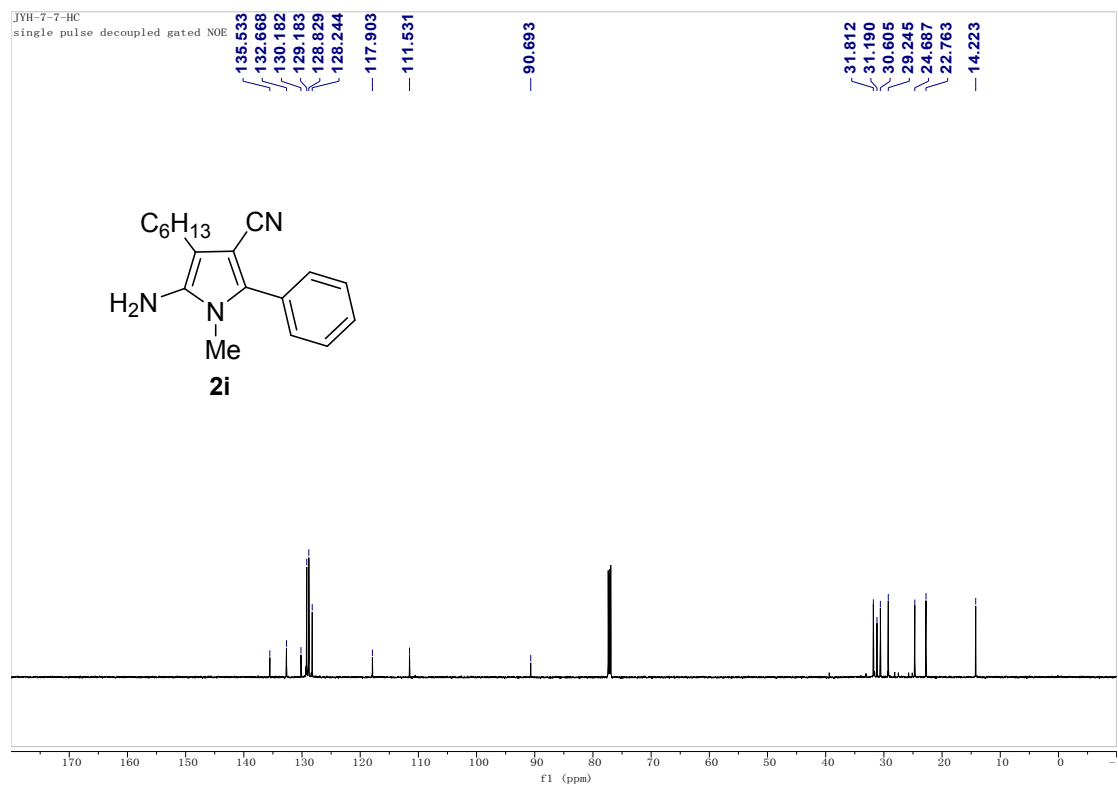

JYH-7-28-H  
single\_pulse

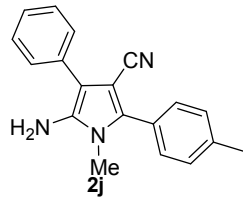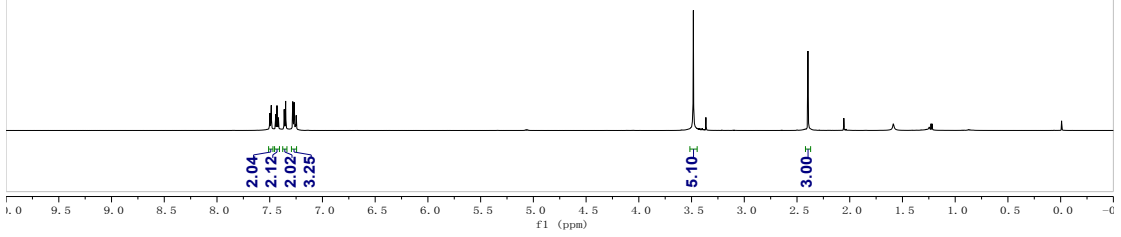

JYH-7-28  
single\_pulse decoupled gated NOE

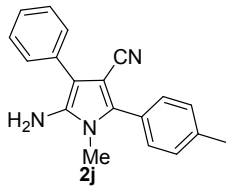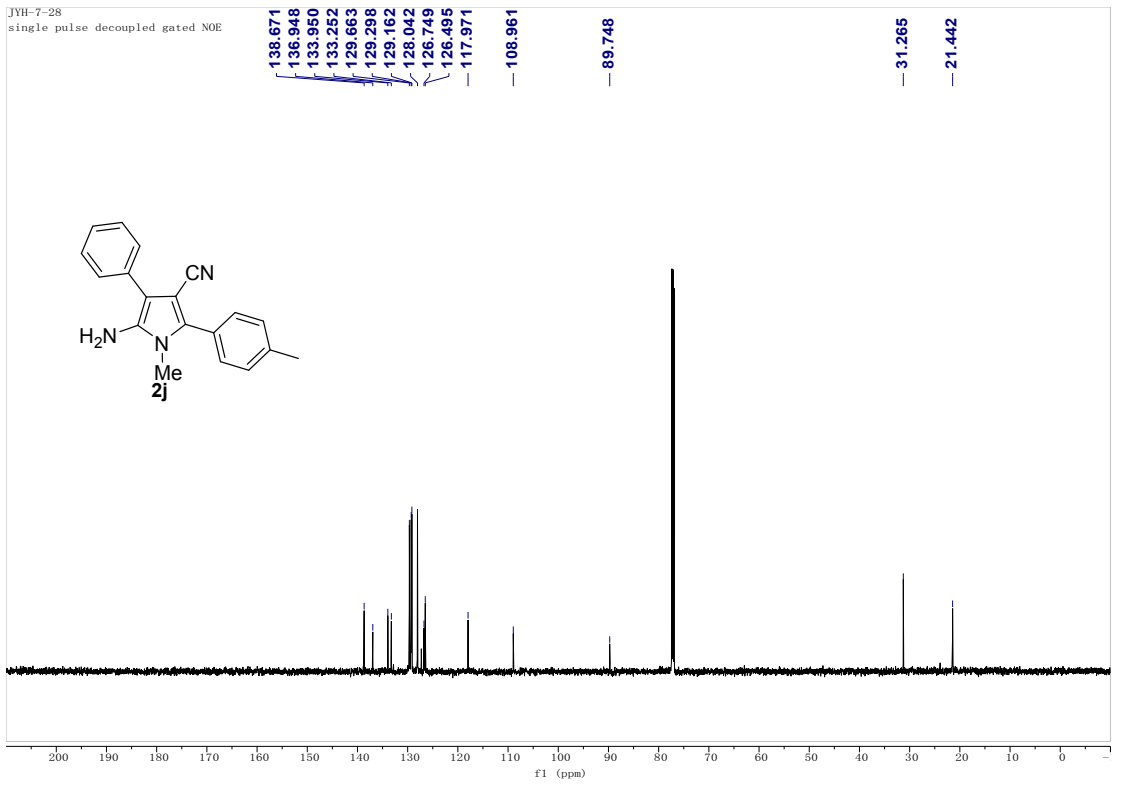

JYH-7-42. 1. Fid

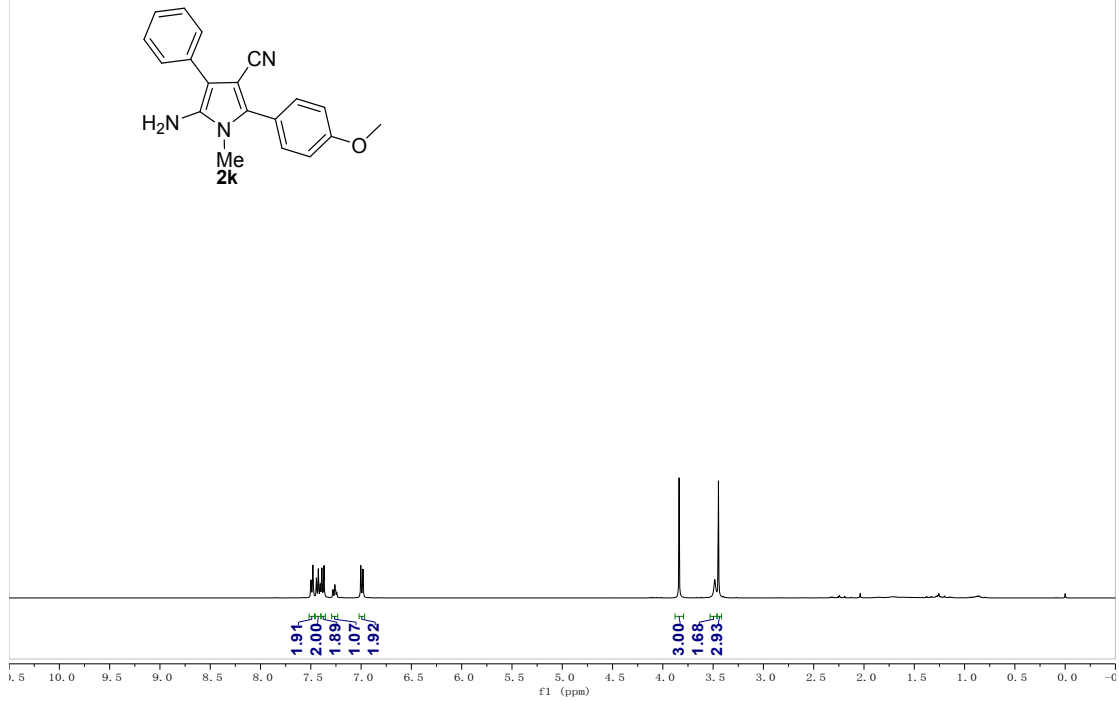

JYH-7-42. 2. Fid

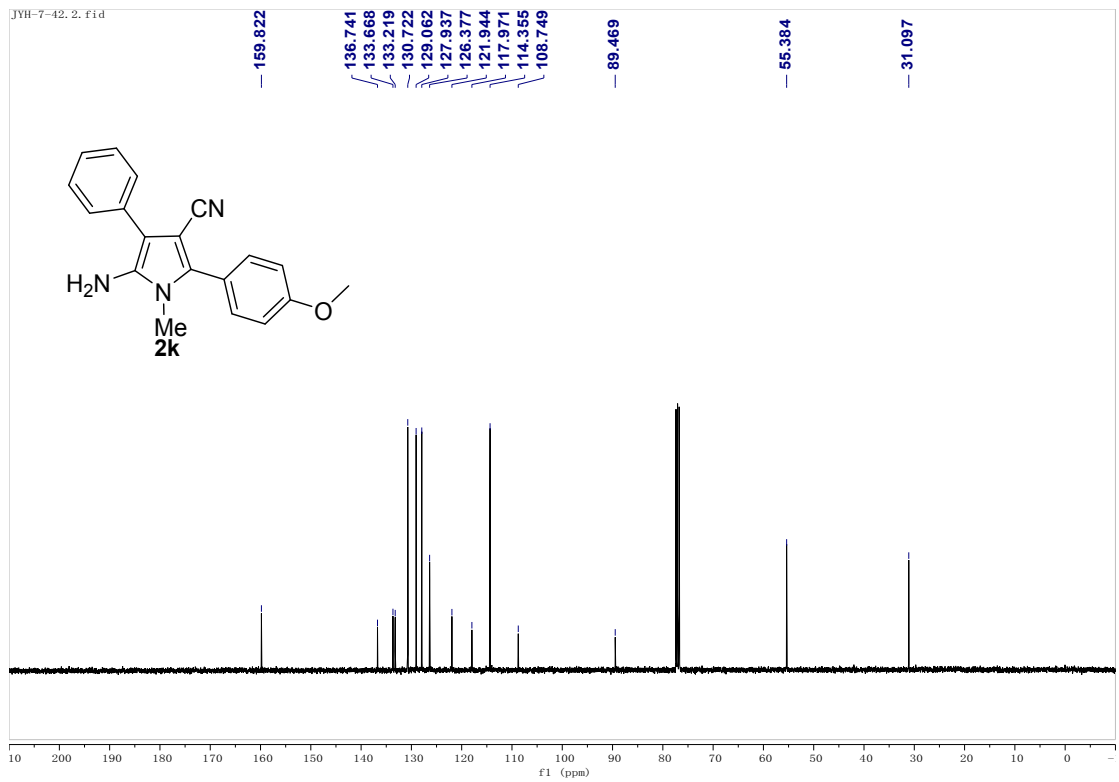



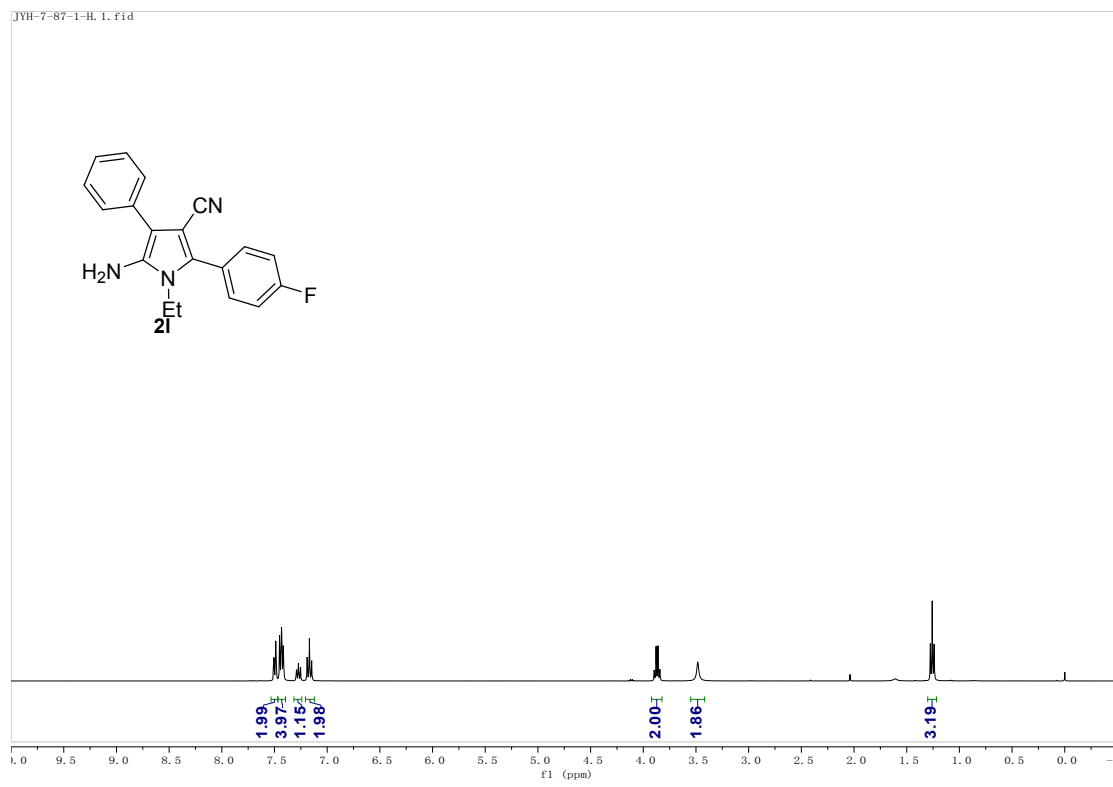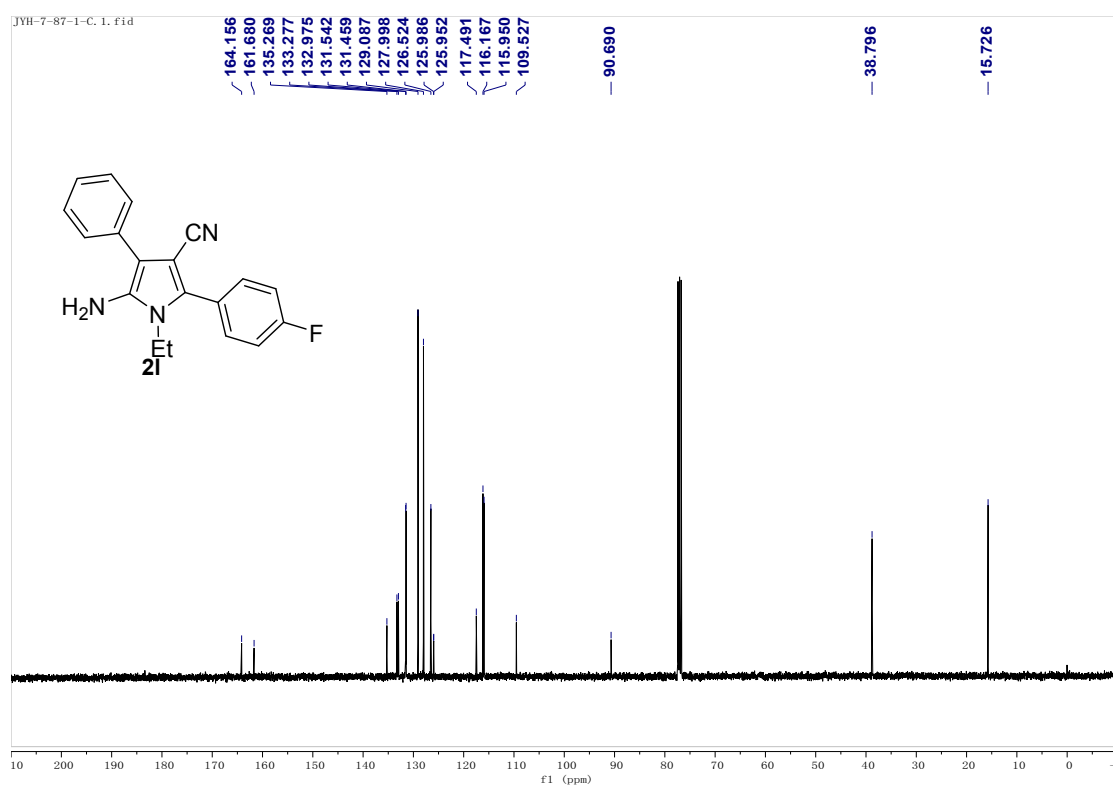

JYH-7-92-1-H  
single\_pulse

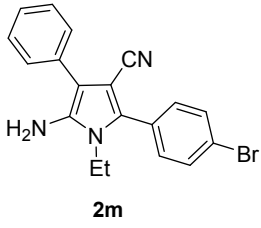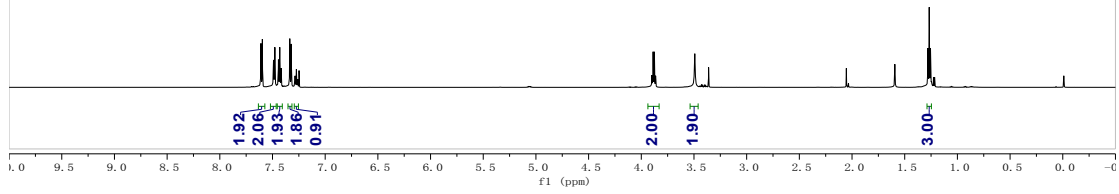

JYH-7-92-1-HC  
single\_pulse decoupled gated NOE

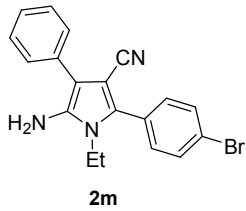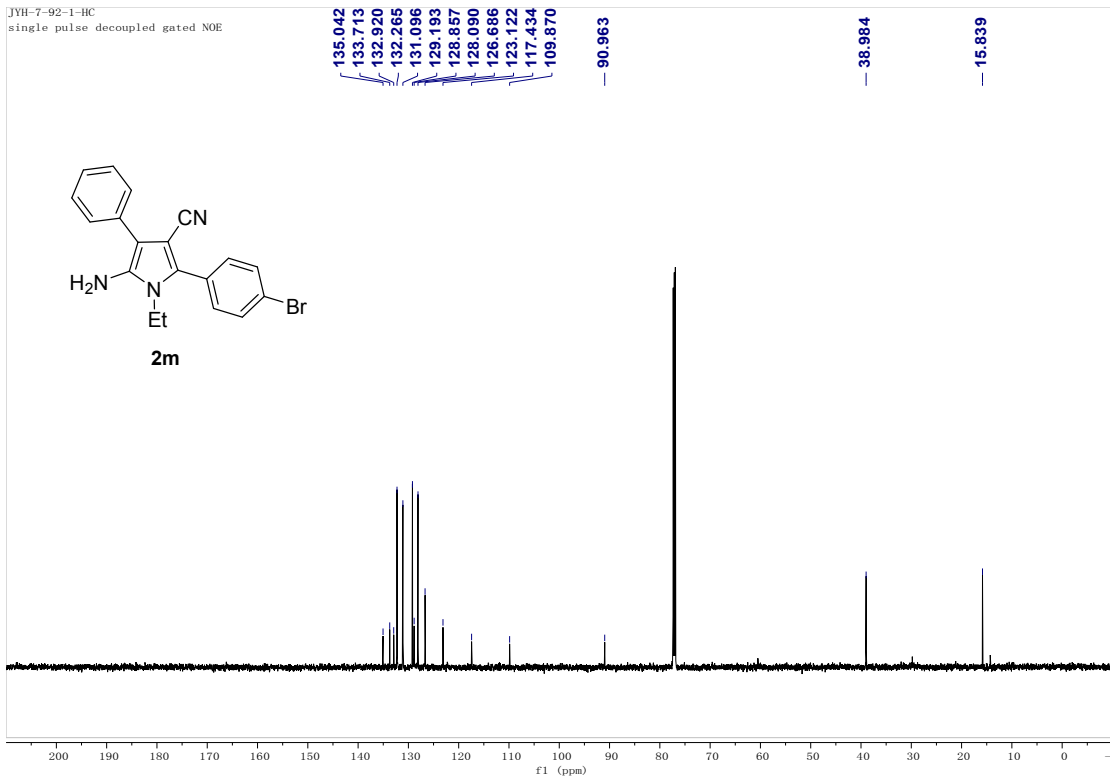

JYH-7-92-2-HFC.1.fid

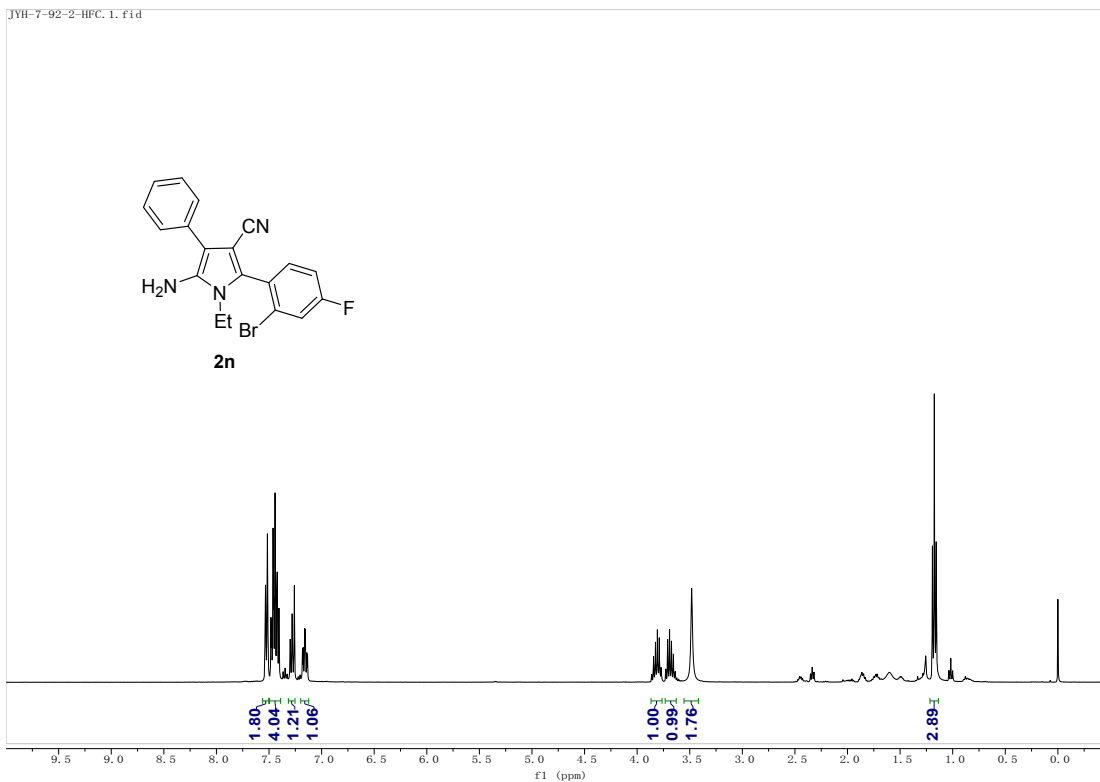

JYH-7-92-2-H-C

single pulse decoupled gat

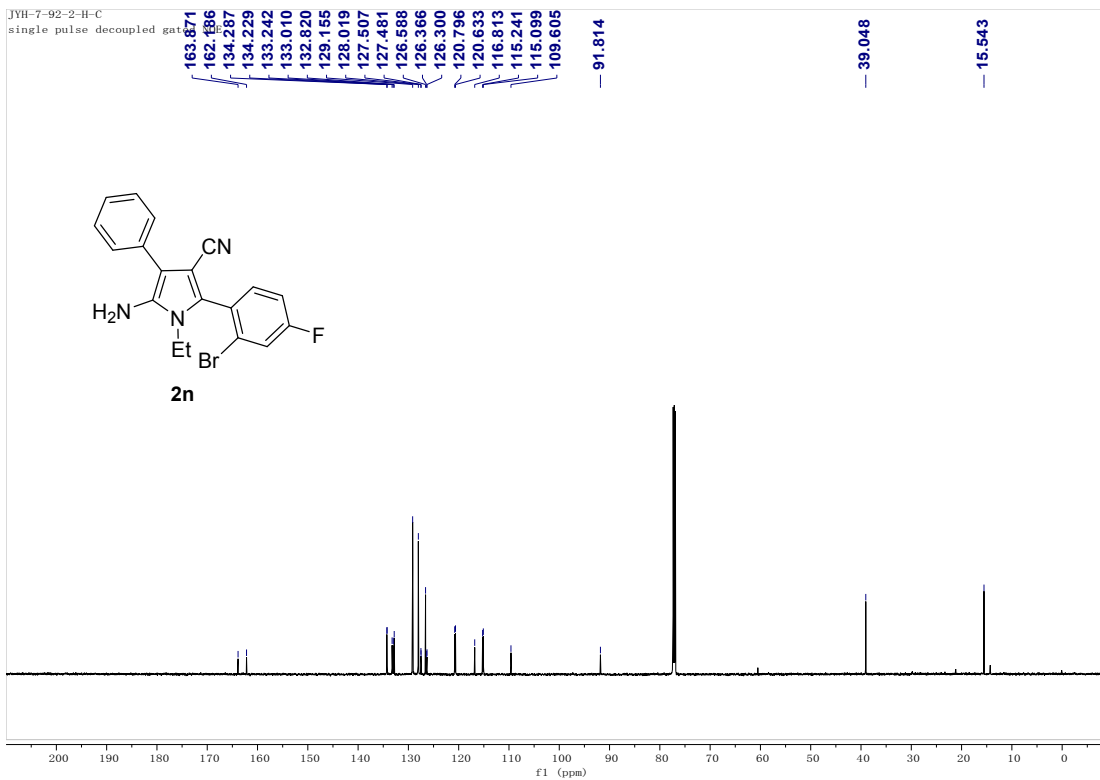

JYH-7-87-2  
single\_pulse

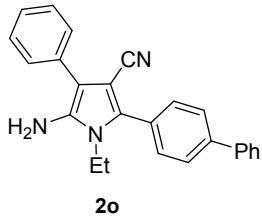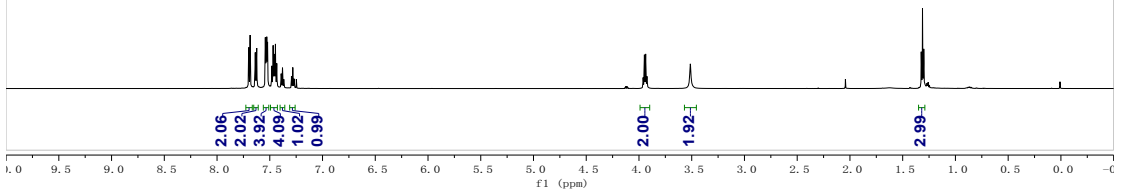

JYH-7-87-2-C.1.fid

141.366  
140.301  
136.143  
133.631  
133.119  
129.866  
129.098  
128.931  
128.765  
128.035  
127.698  
127.570  
127.114  
126.478  
117.833  
109.505  
90.495  
38.967  
15.801

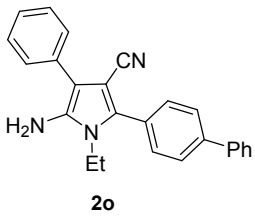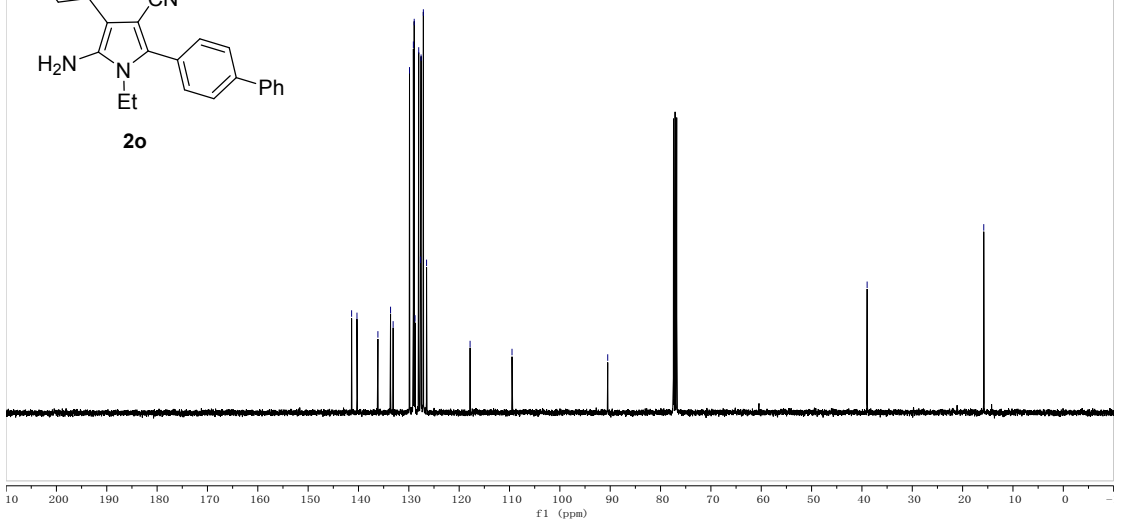

JYH-7-69-HC  
single\_pulse

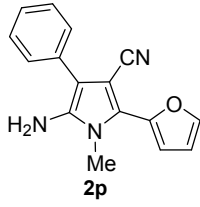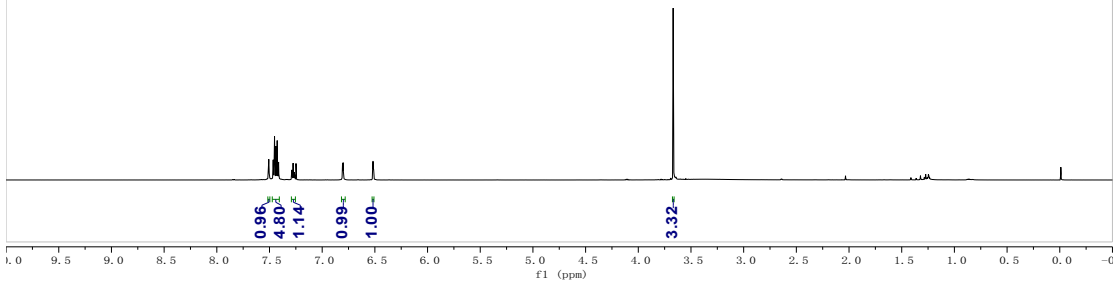

JYH-7-69-HC  
single\_pulse decoupled gated NOE

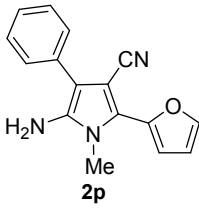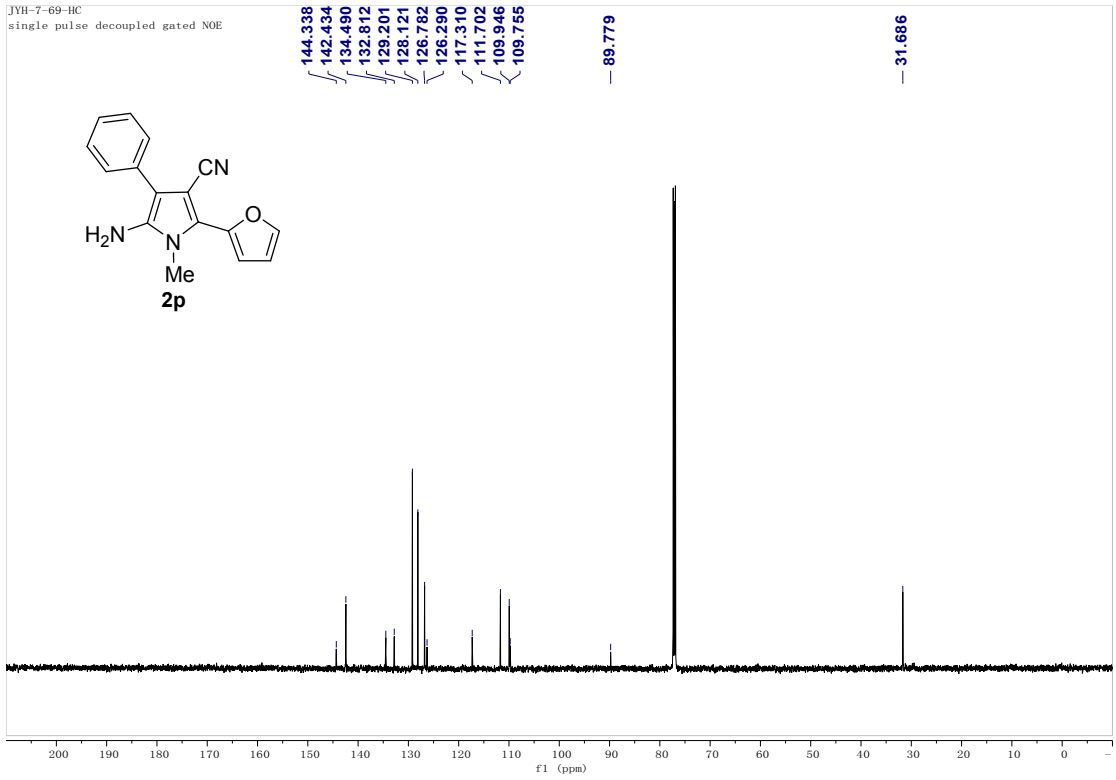

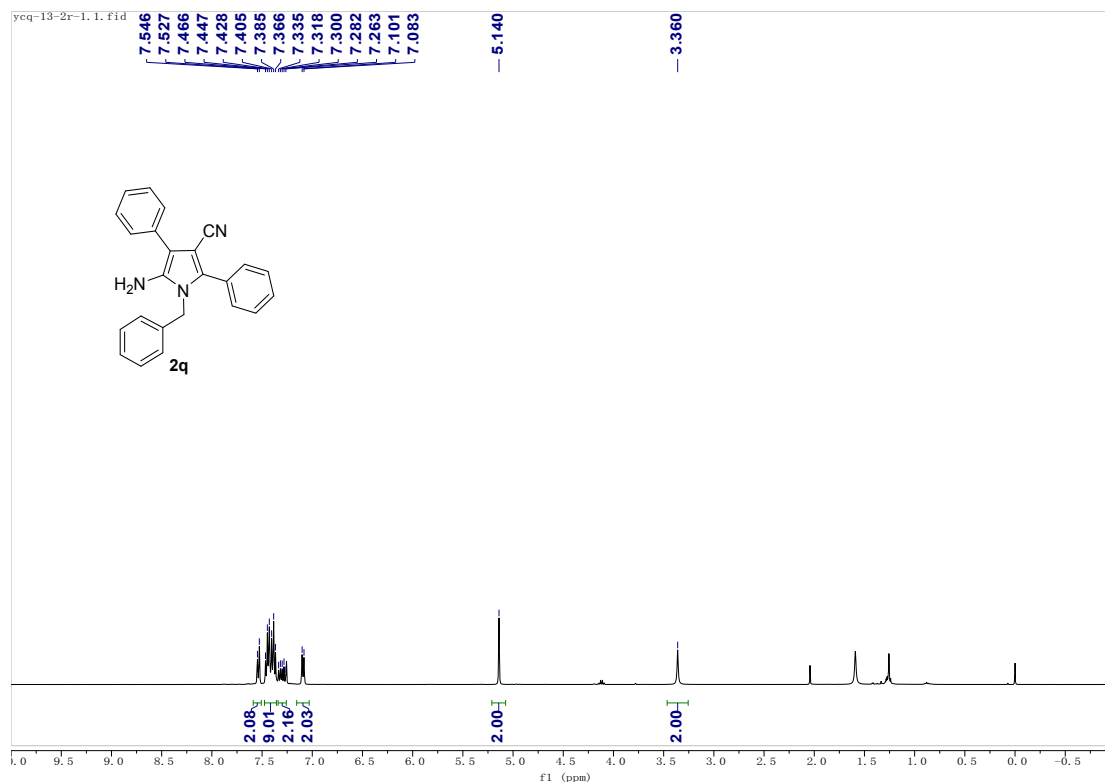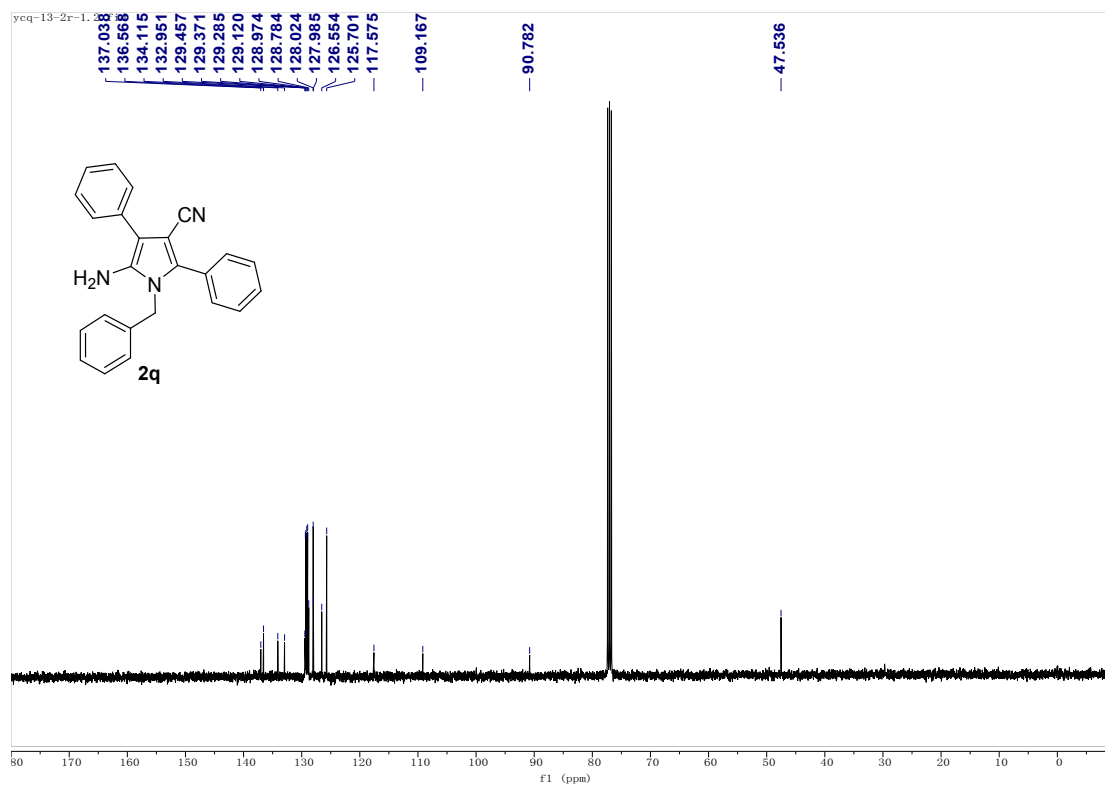

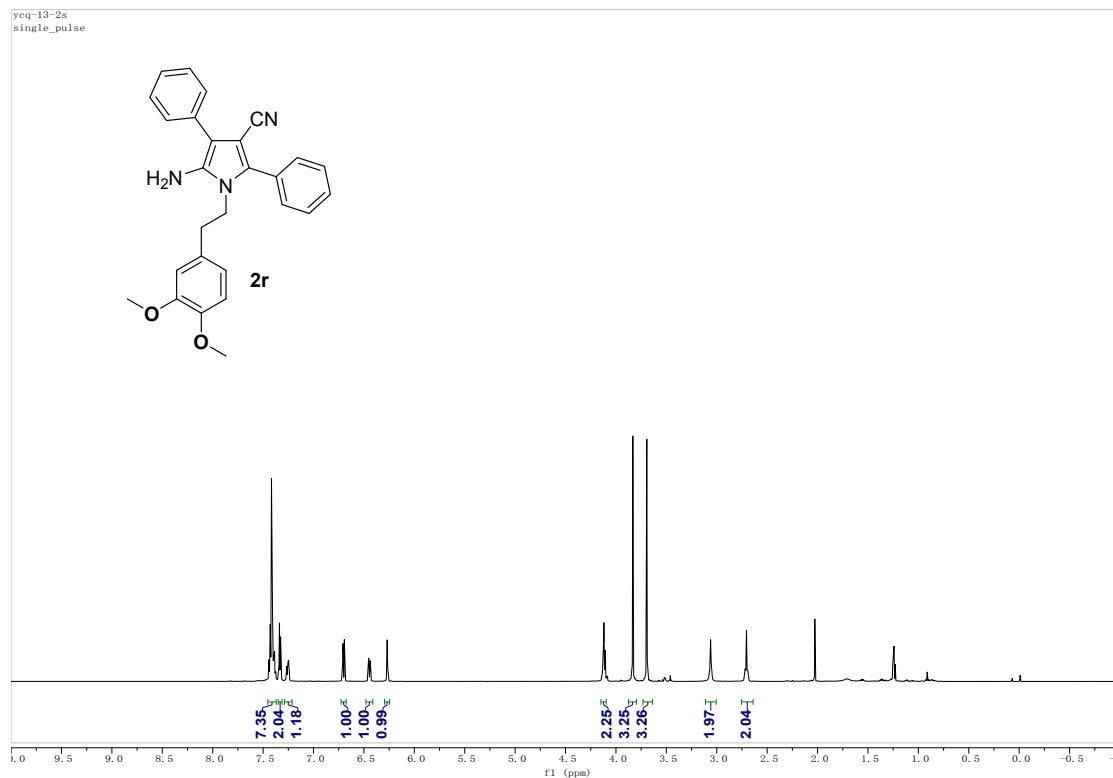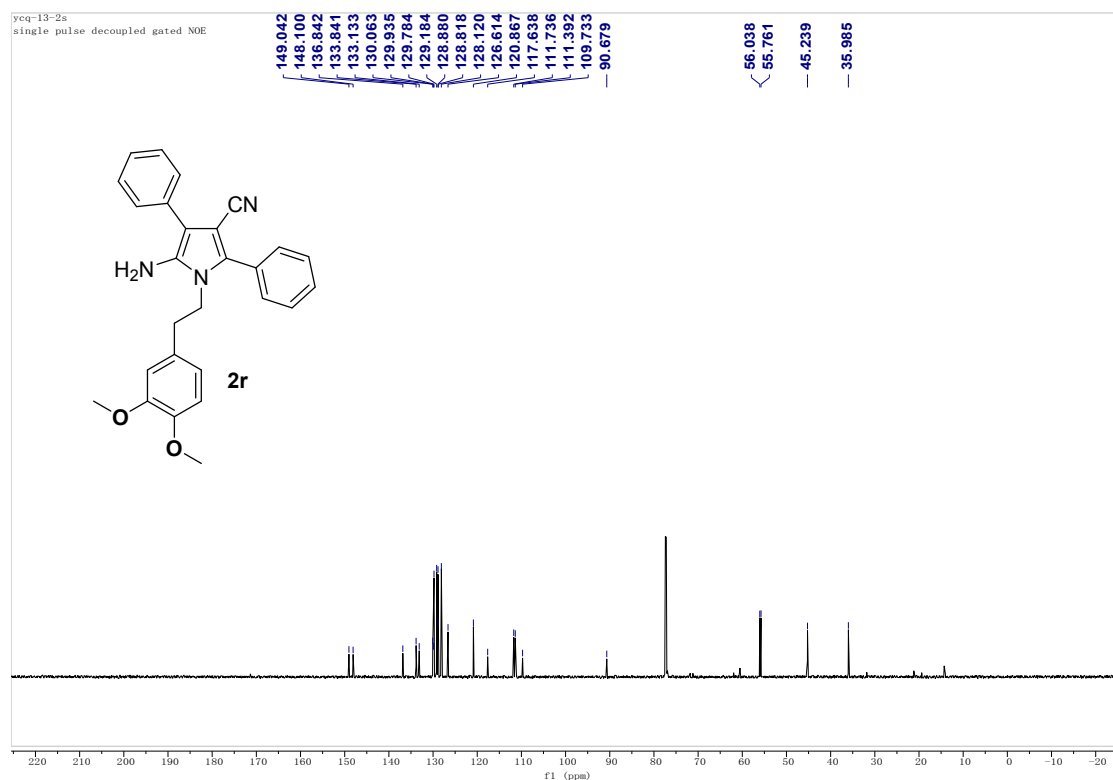

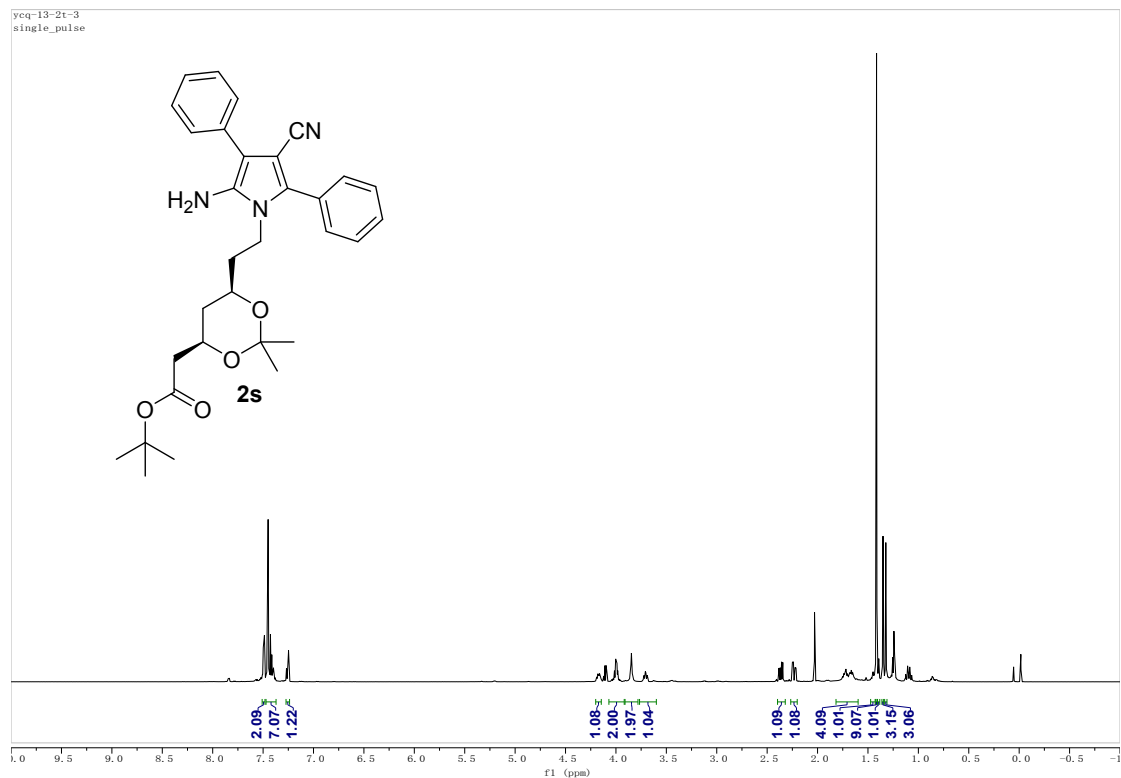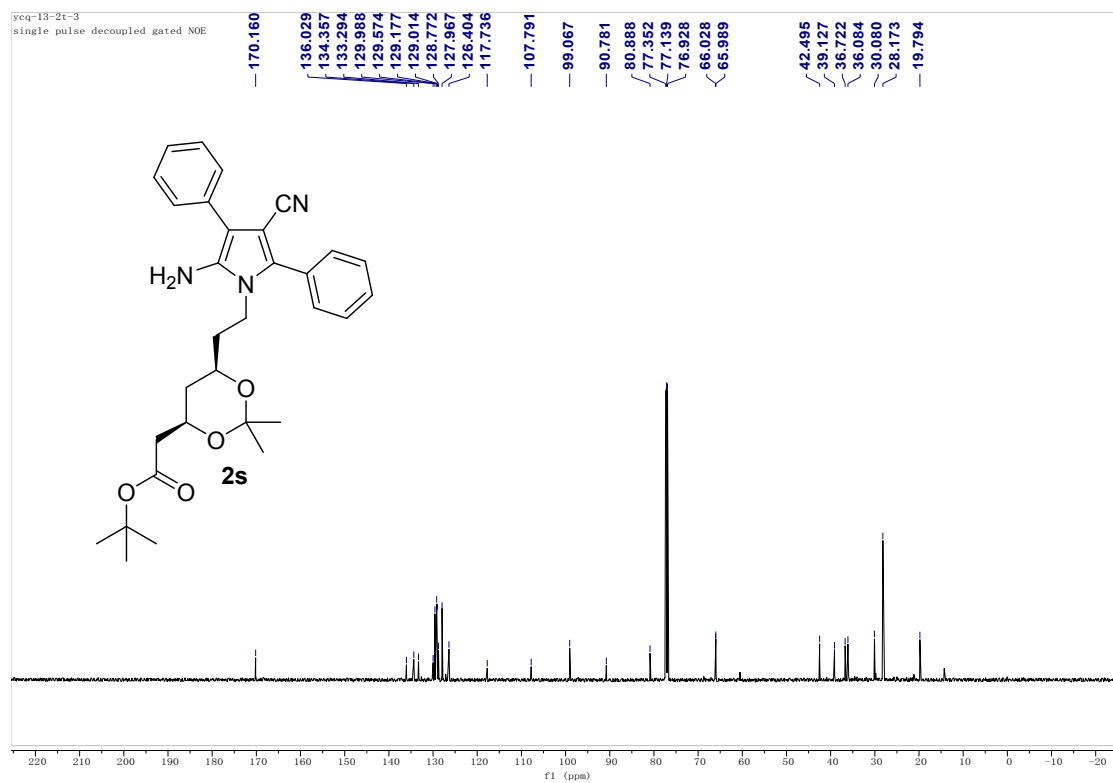



yeq-13-2u-2.1.fid

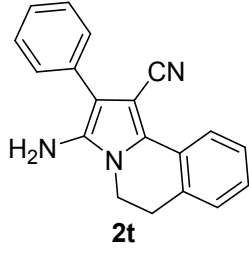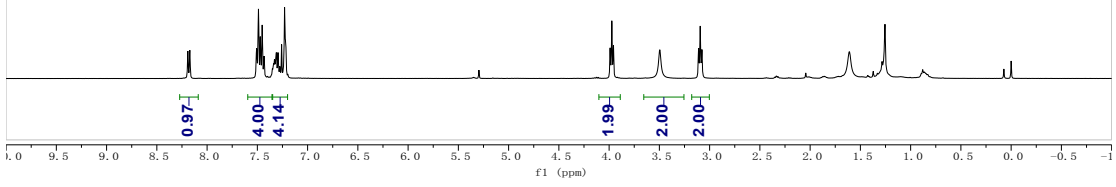

yeq-13-2u-2.2.fid

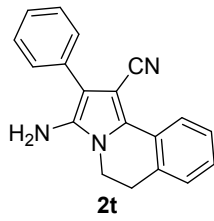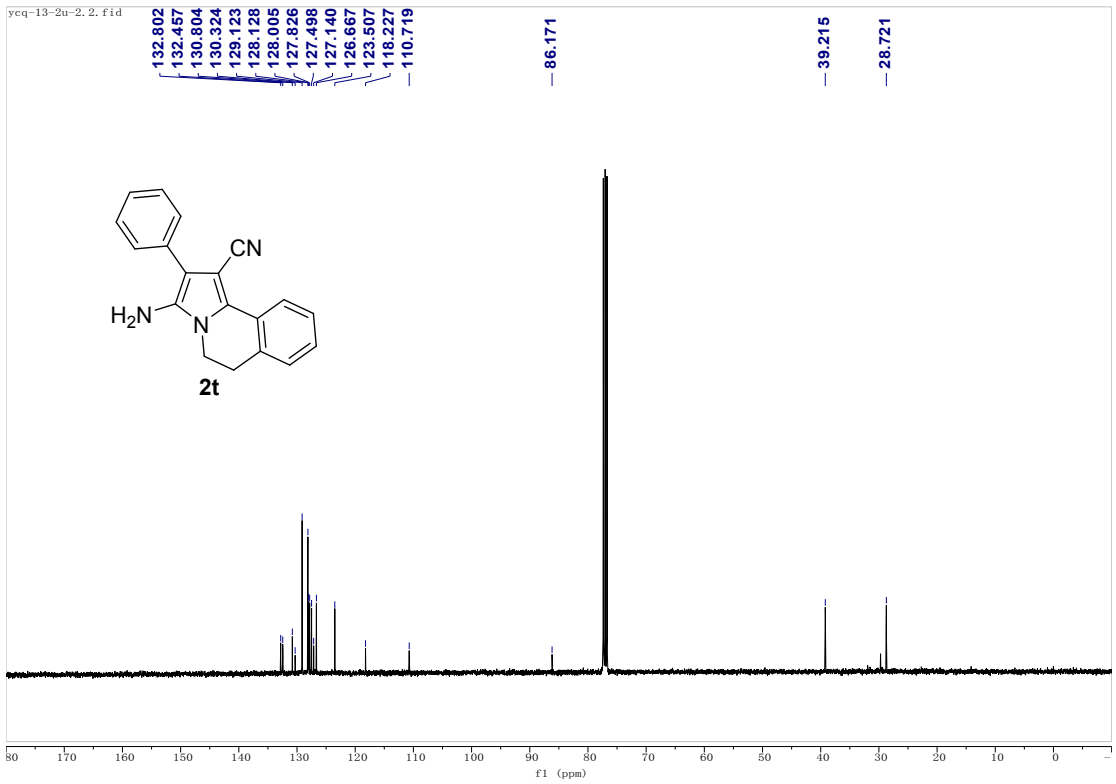

yeq-13-2v. 1. fid

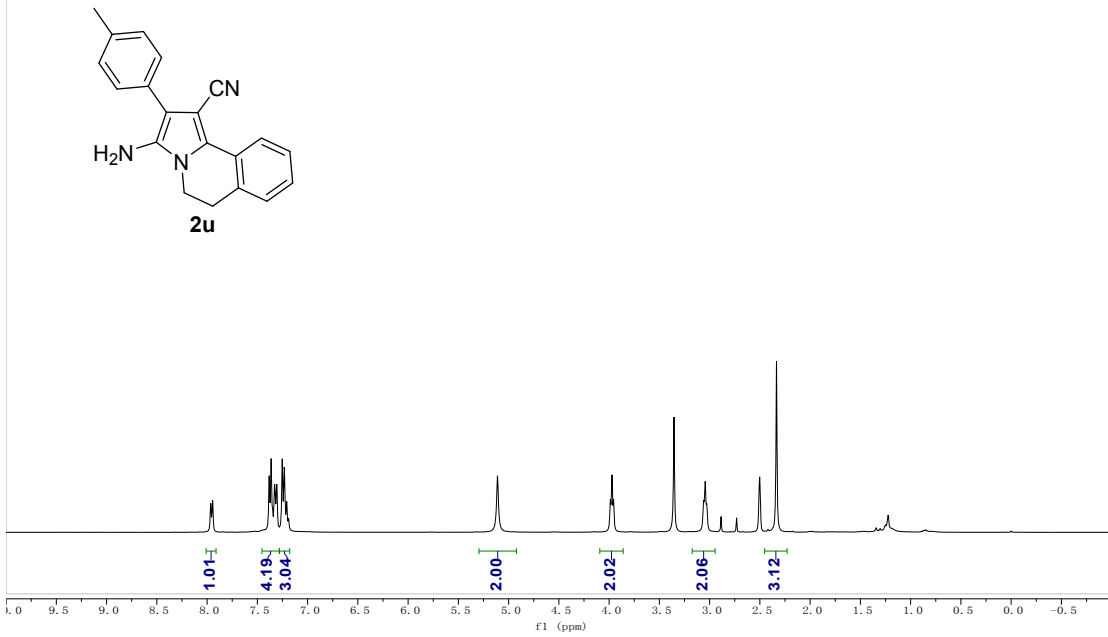

yeq-13-2v. 2. fid

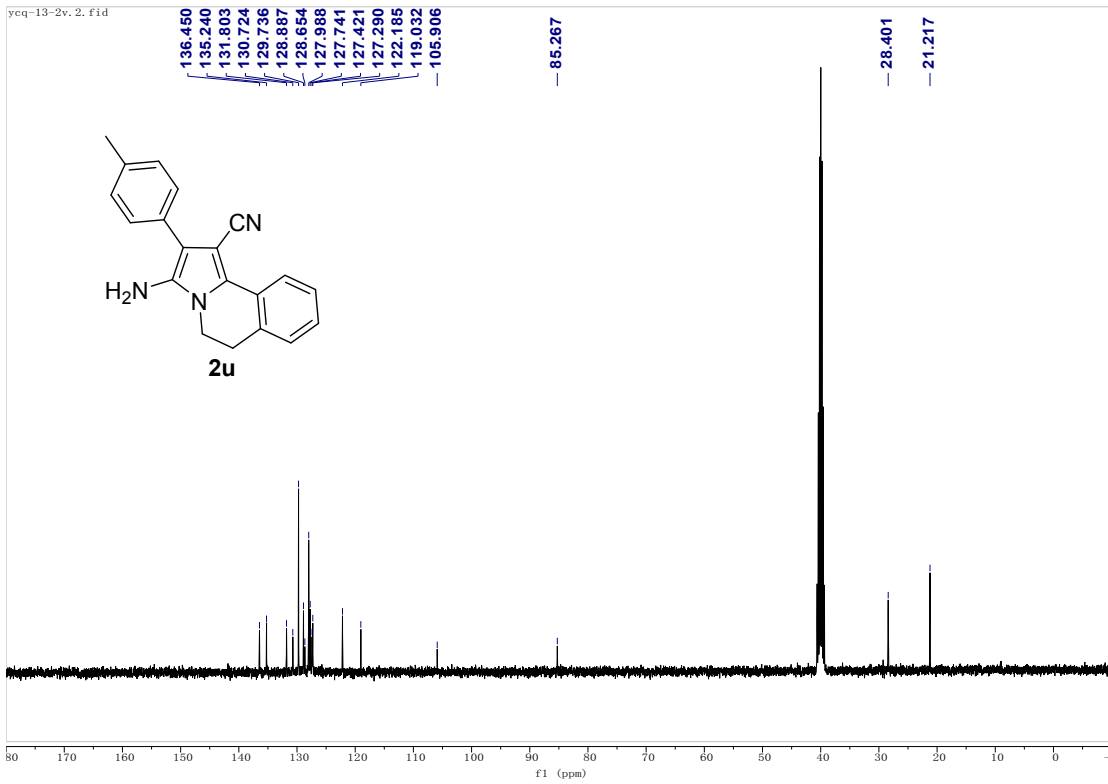

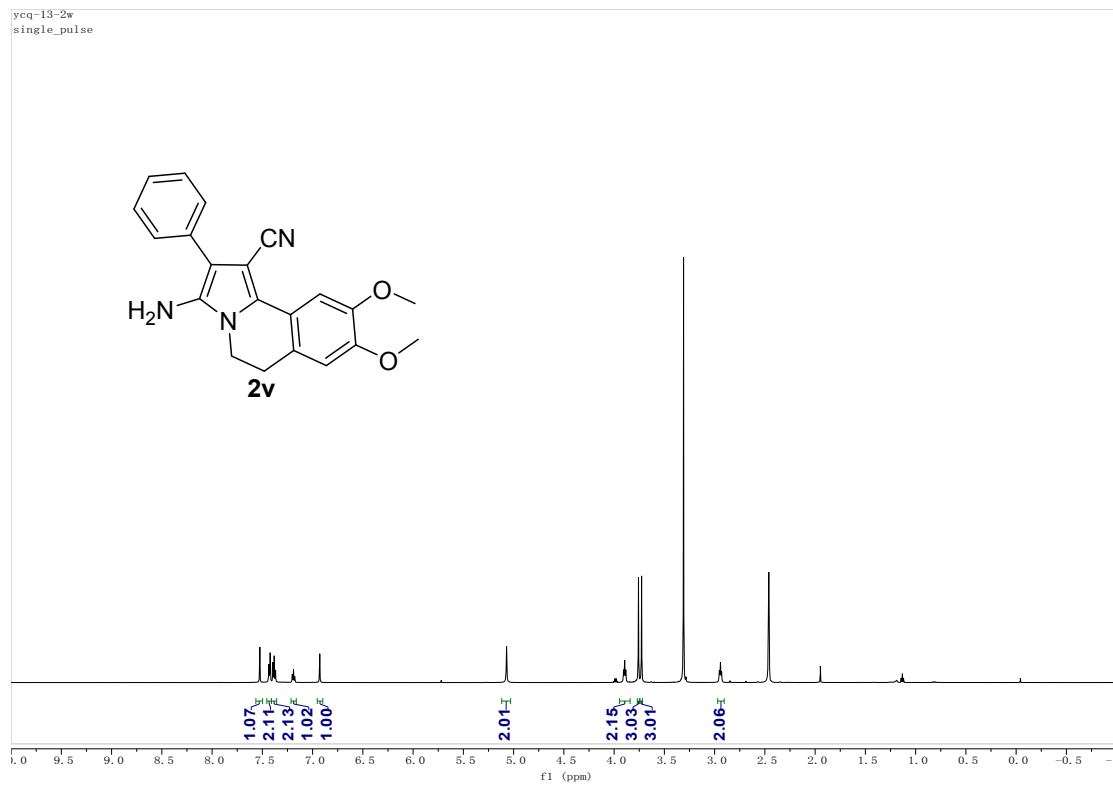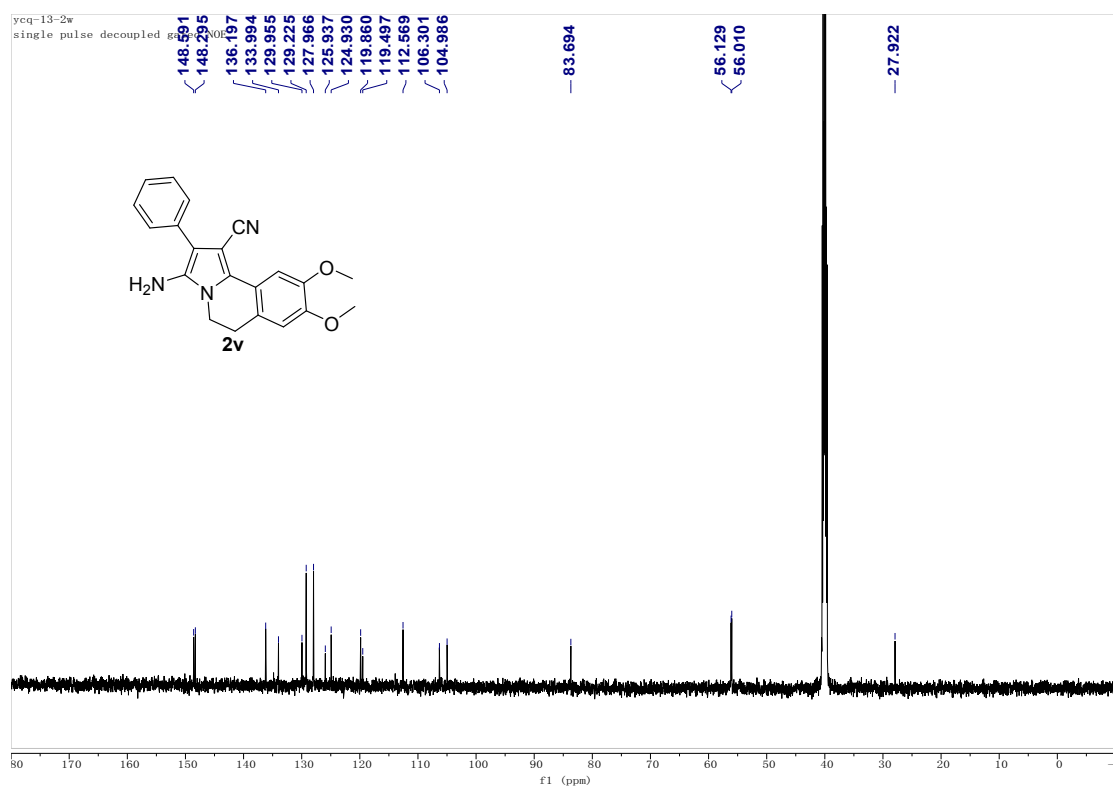

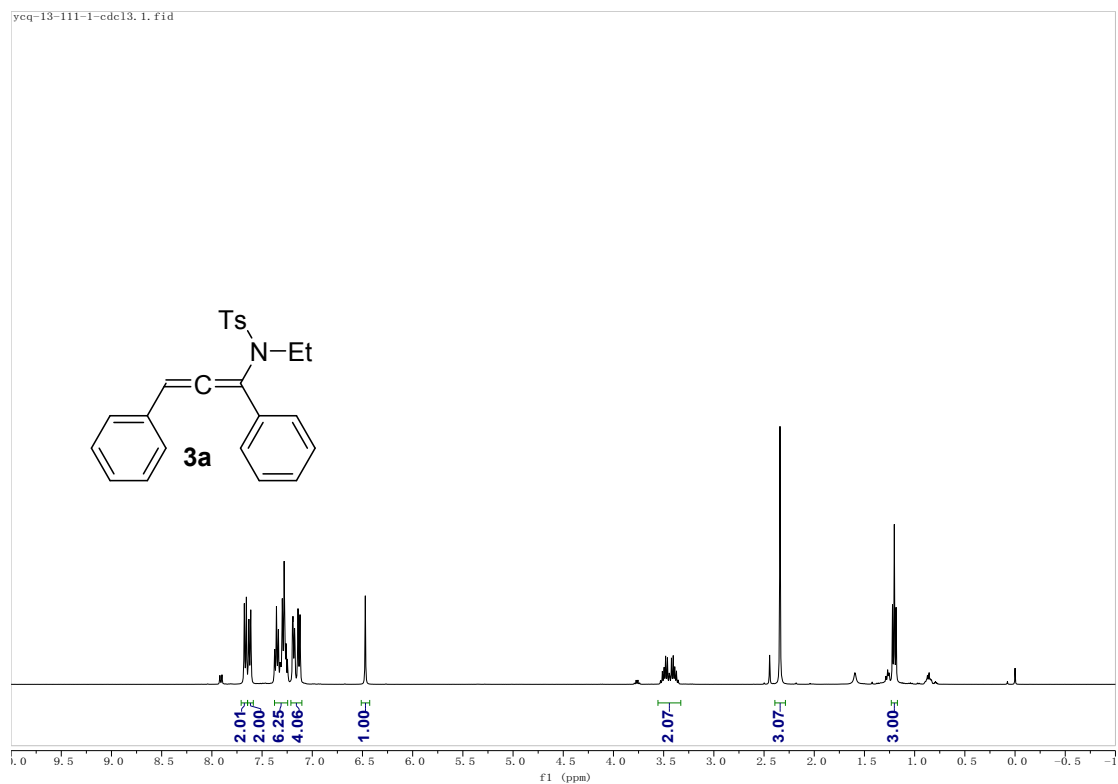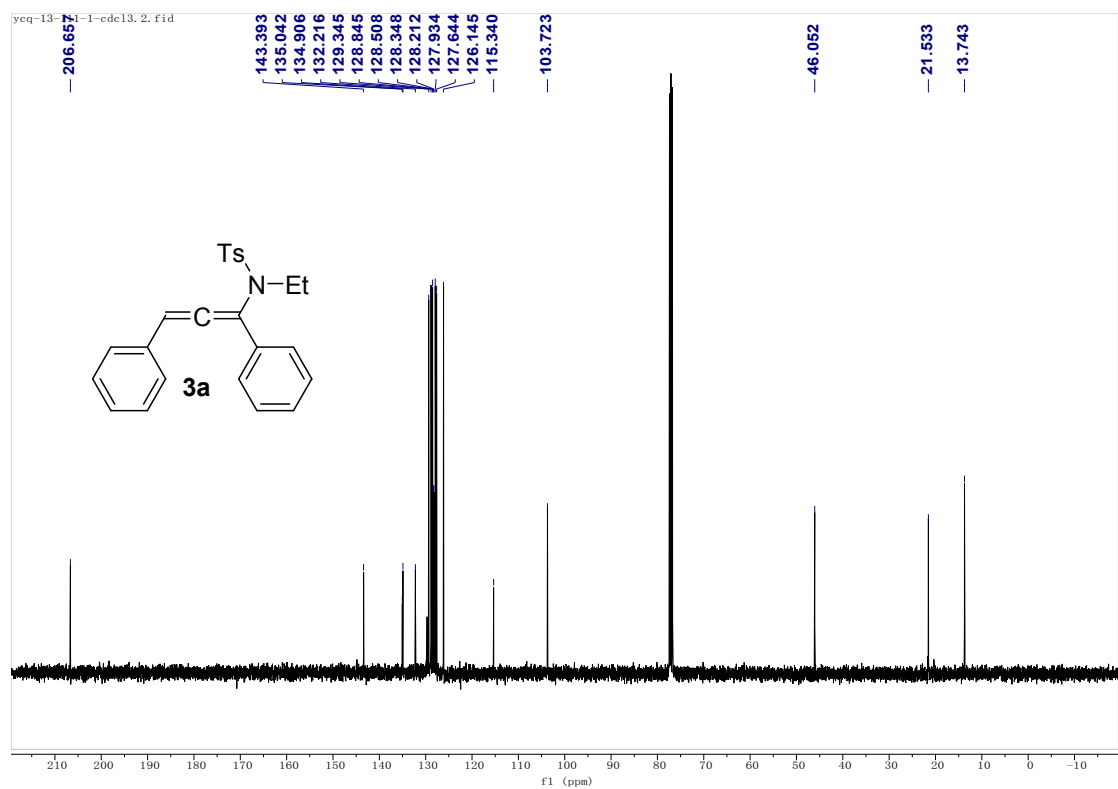

YCQ-12-93-1  
single\_pulse

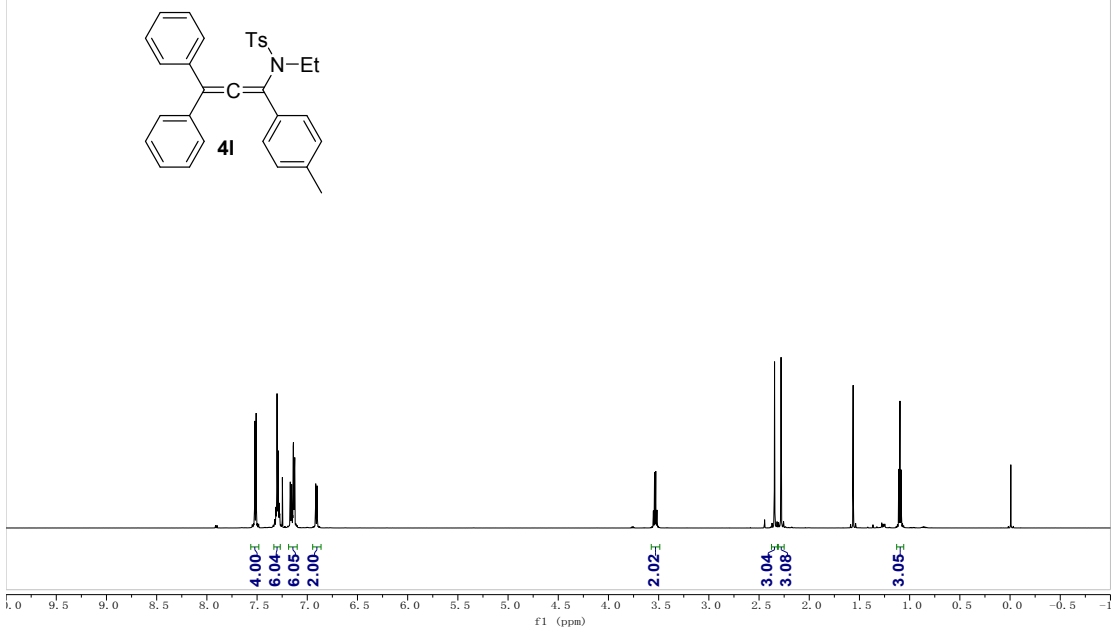

YCQ-12-93-1  
single\_pulse decoupled gated NOE

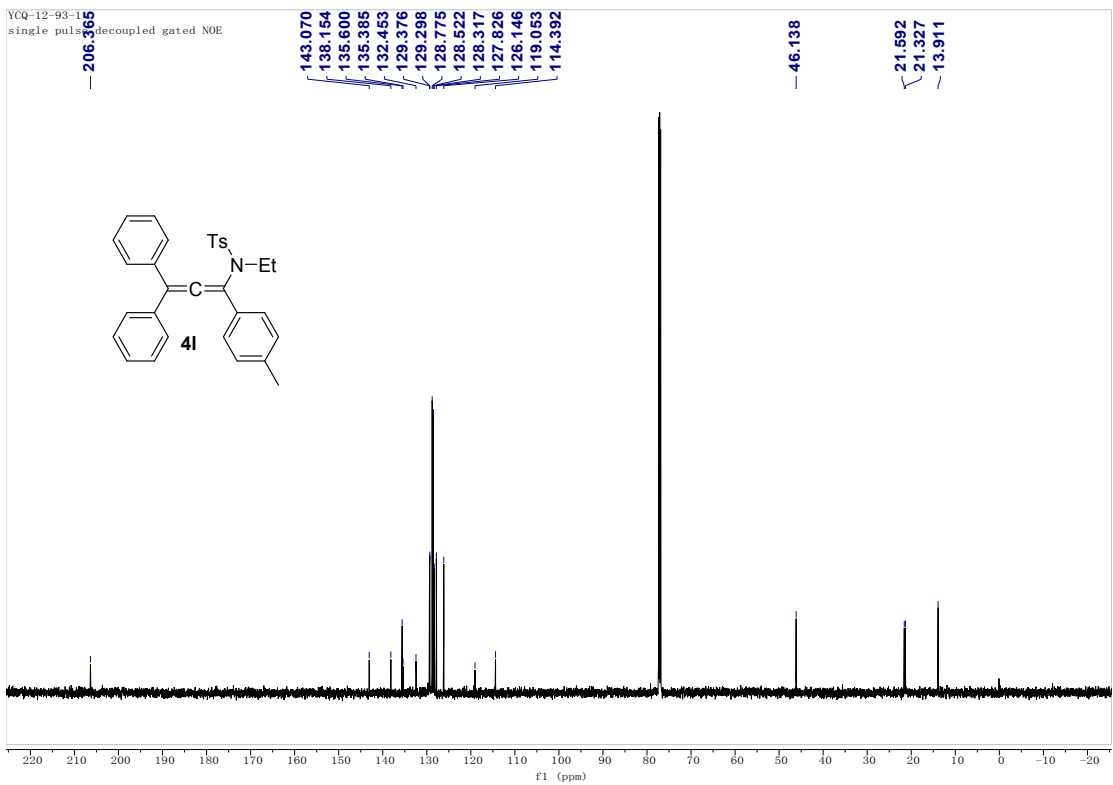

JYH-6-80-2-H.1.fid

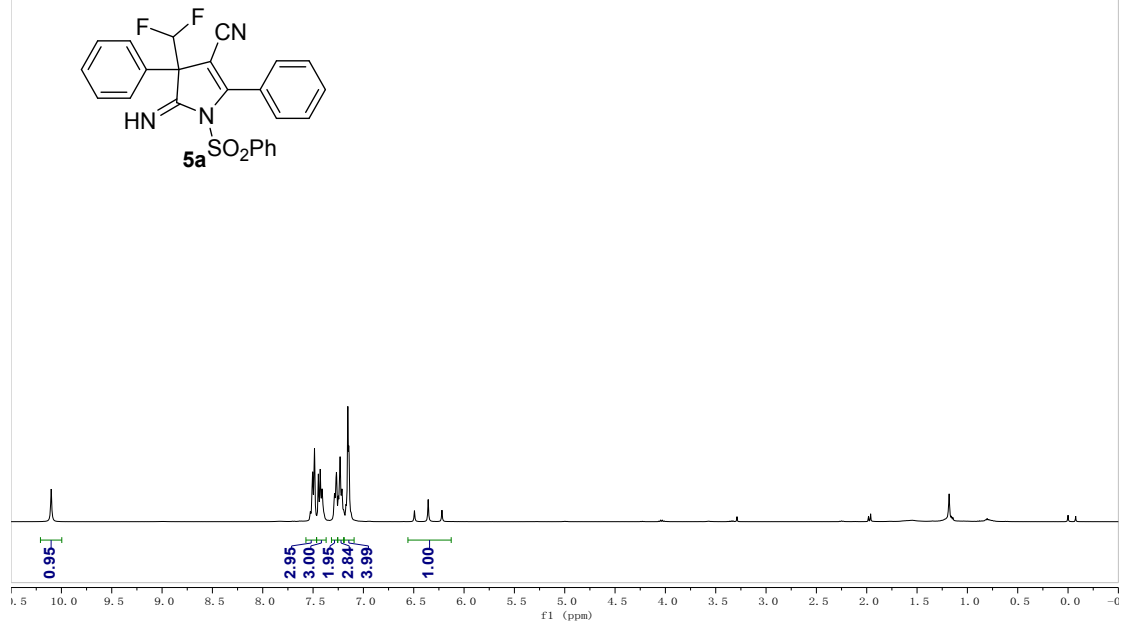

JYH-6-80-2HC

single pulse decoupled

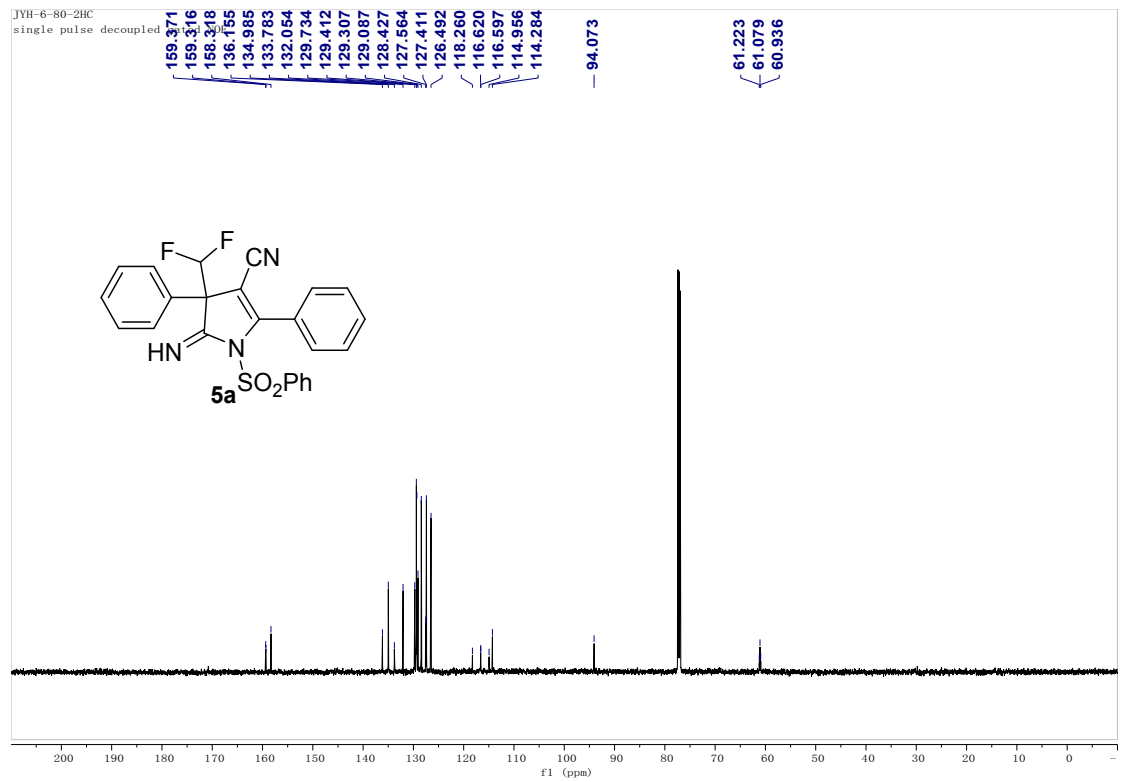

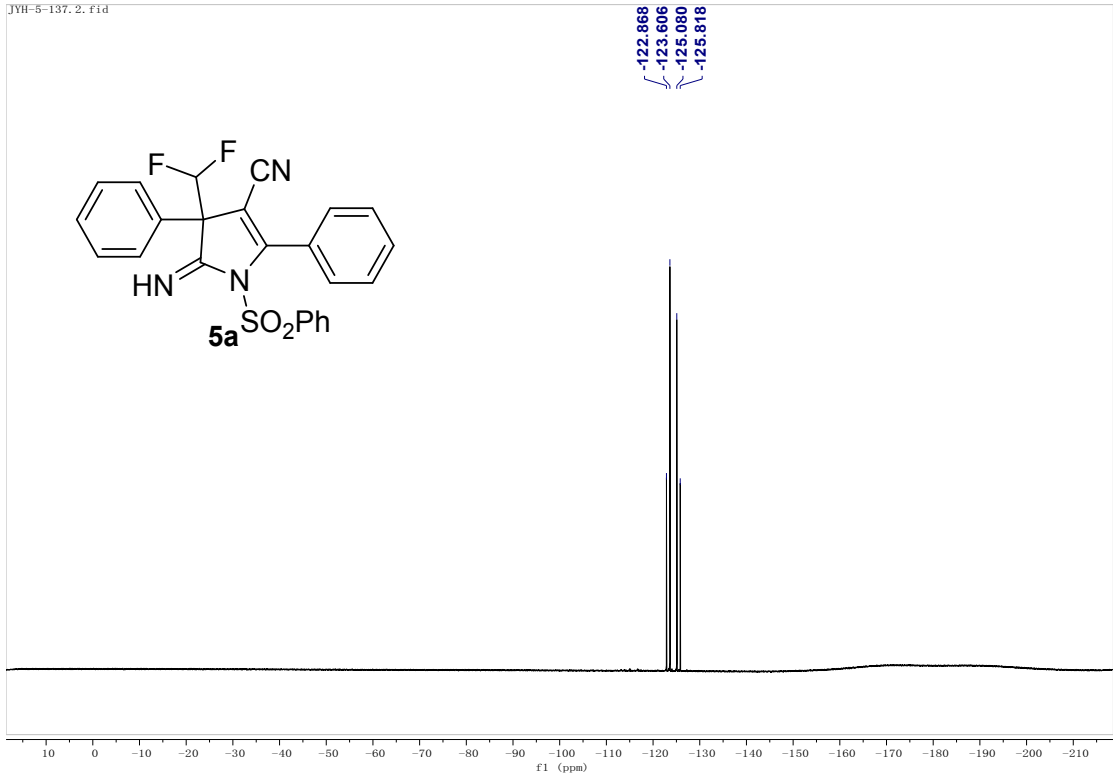

JYH-6-85-1-H-C  
single\_pulse

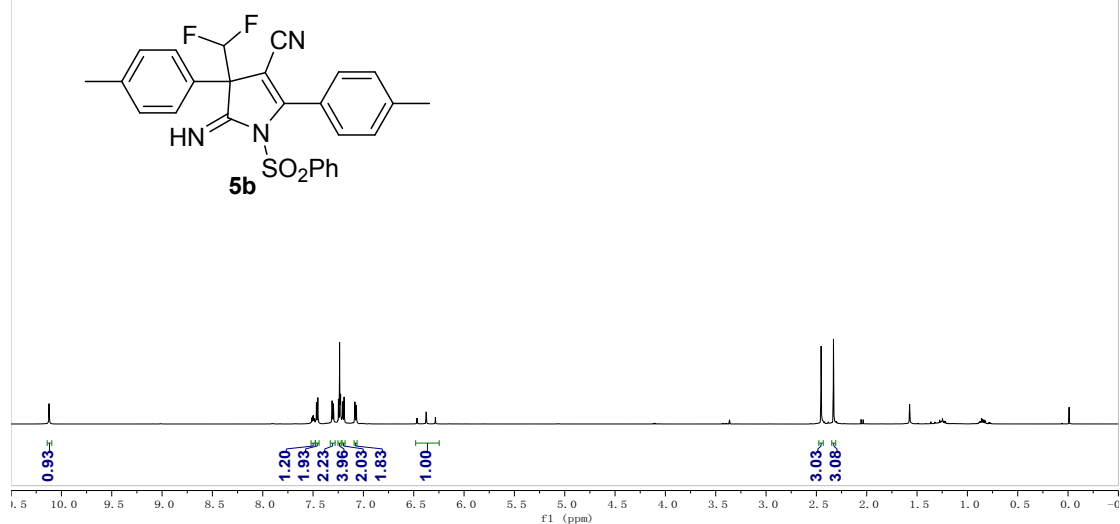

JYH-6-85-1-H-C  
single\_pulse decoupled gated NOE

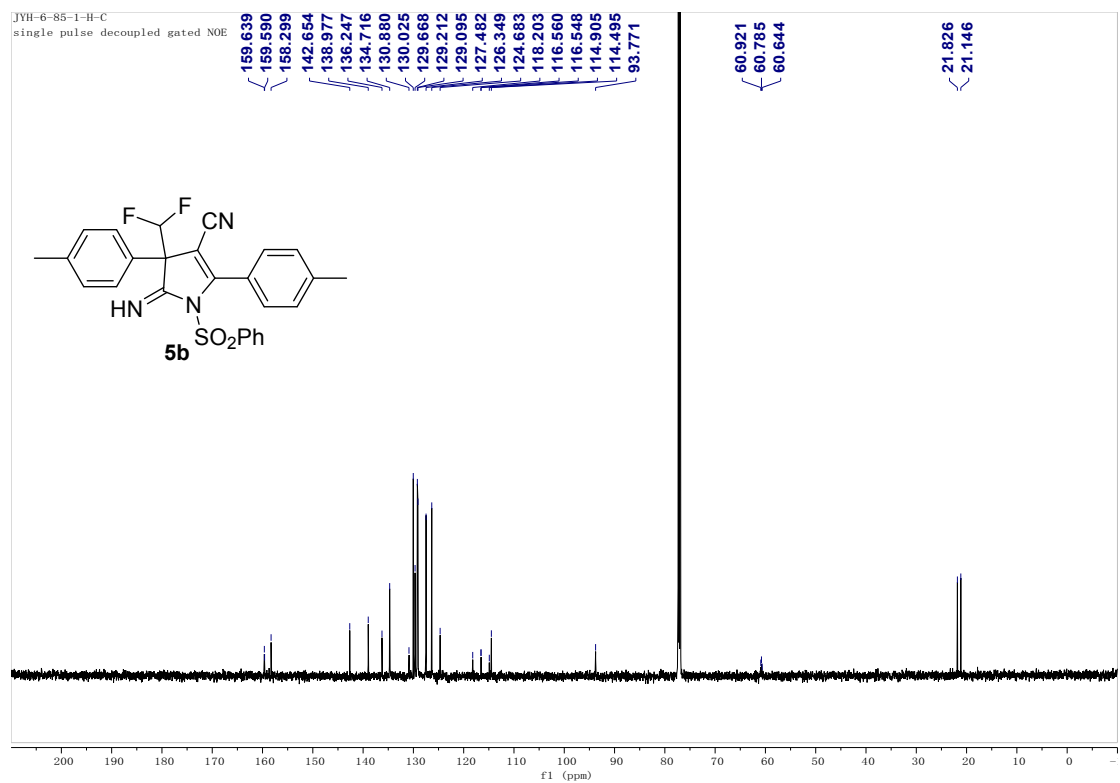



JYH-6-85-1.2.fid

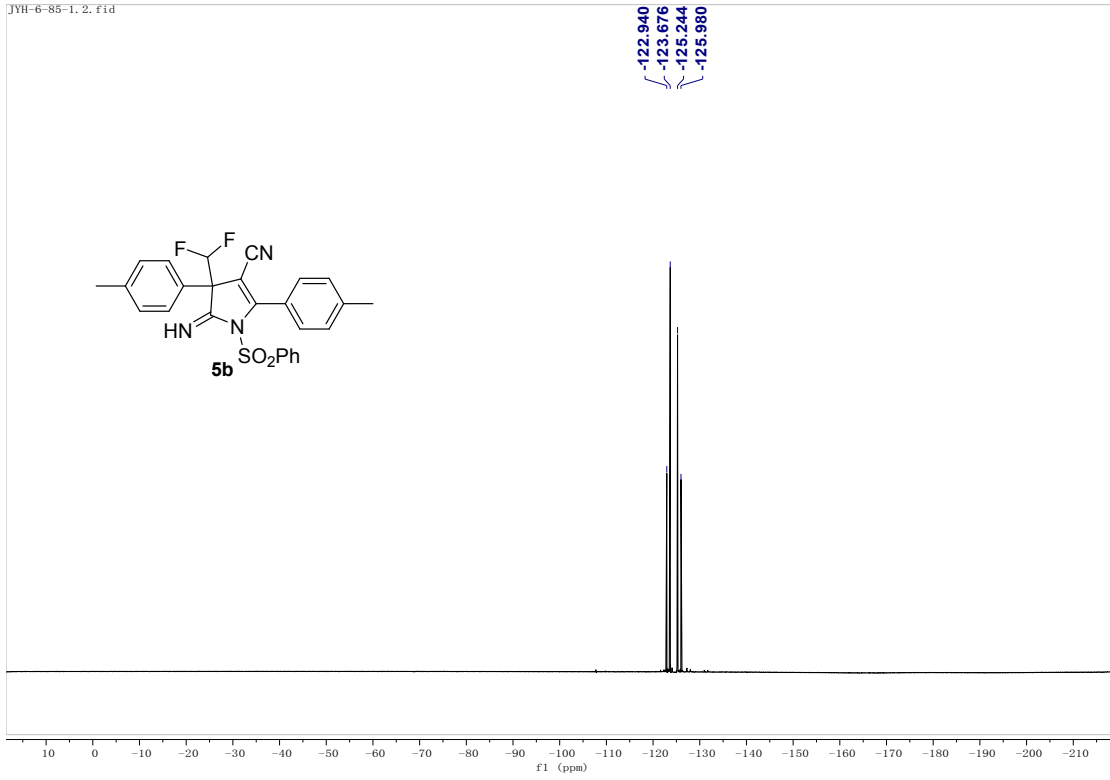

JYH-6-79-H.1.fid

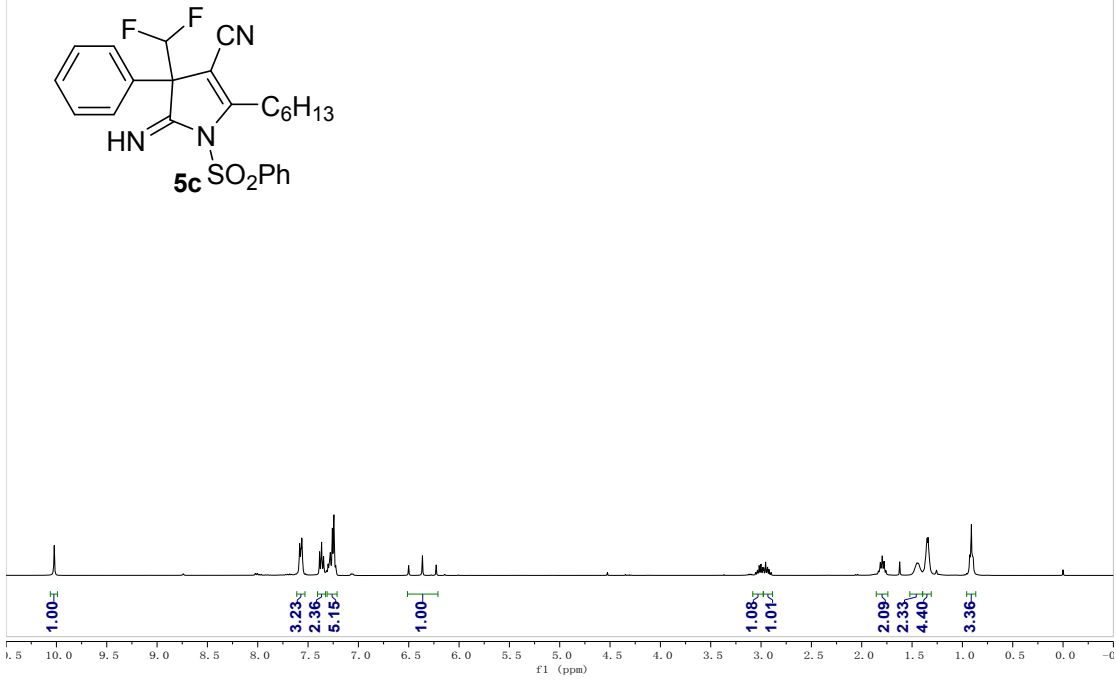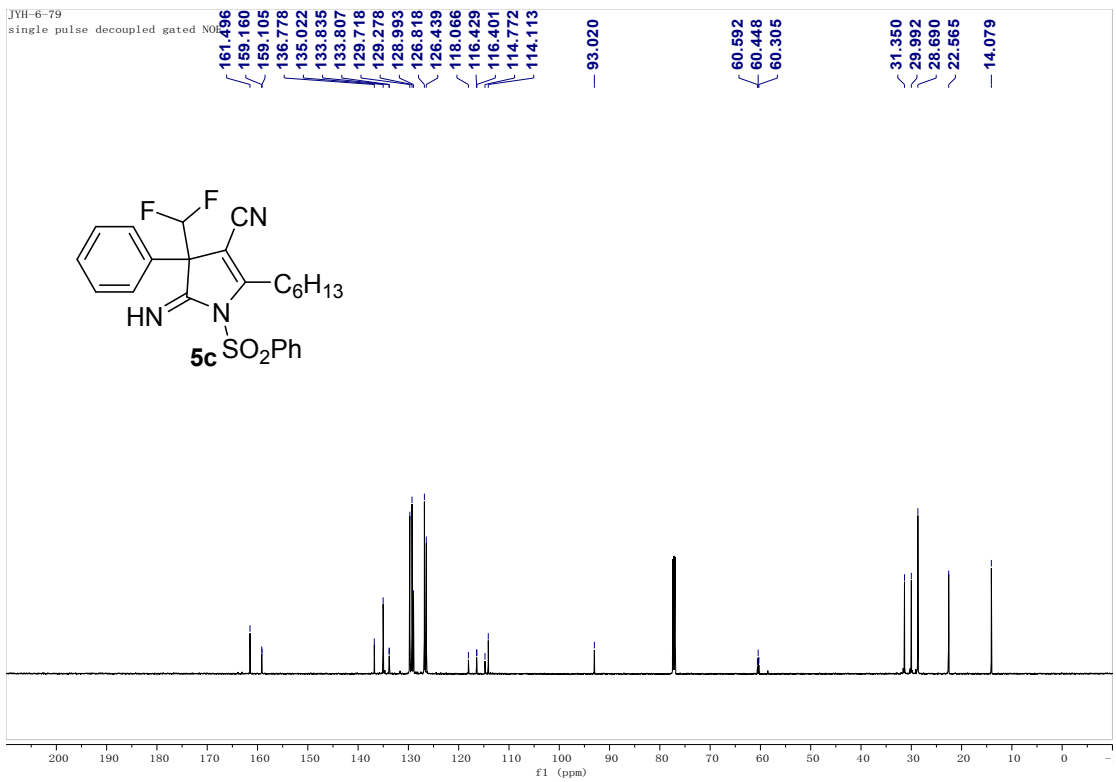

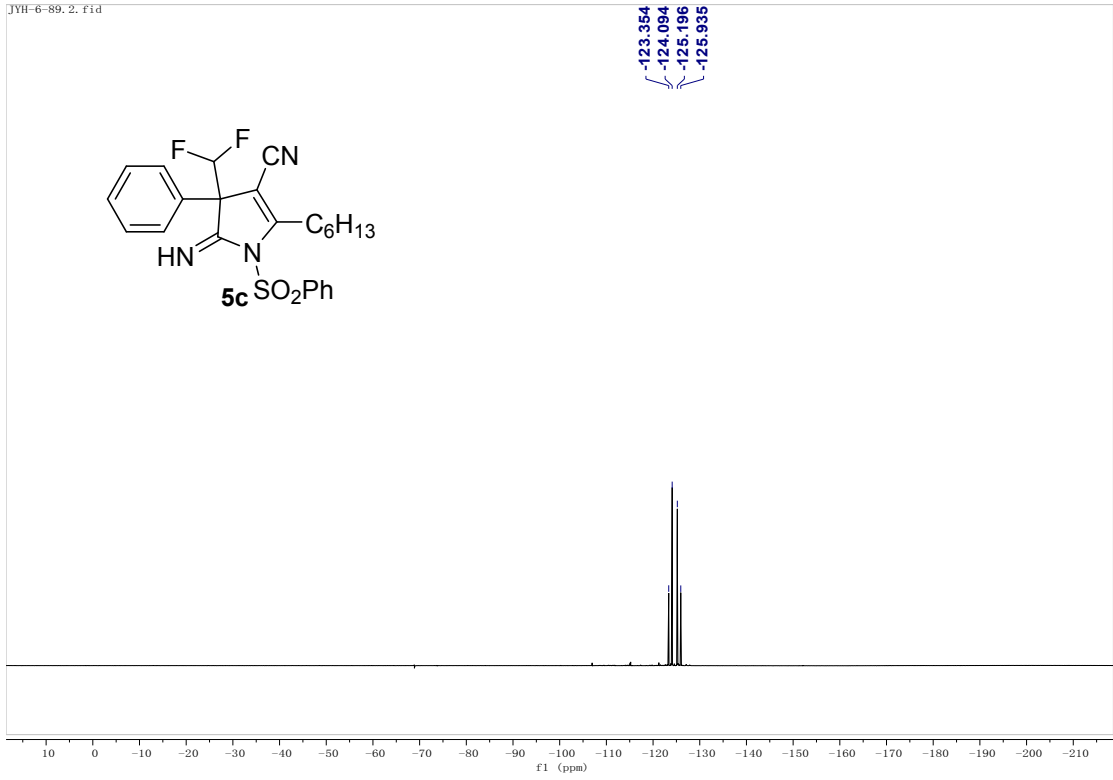

JYH-6-87-1-2.1.fid

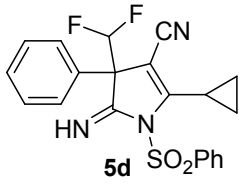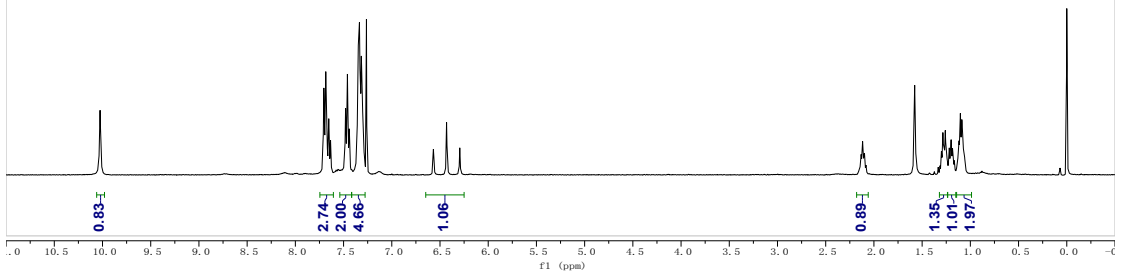

JYH-6-87-1-HC

single pulse decoupled gated NOE

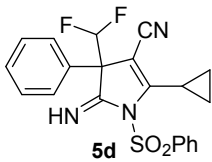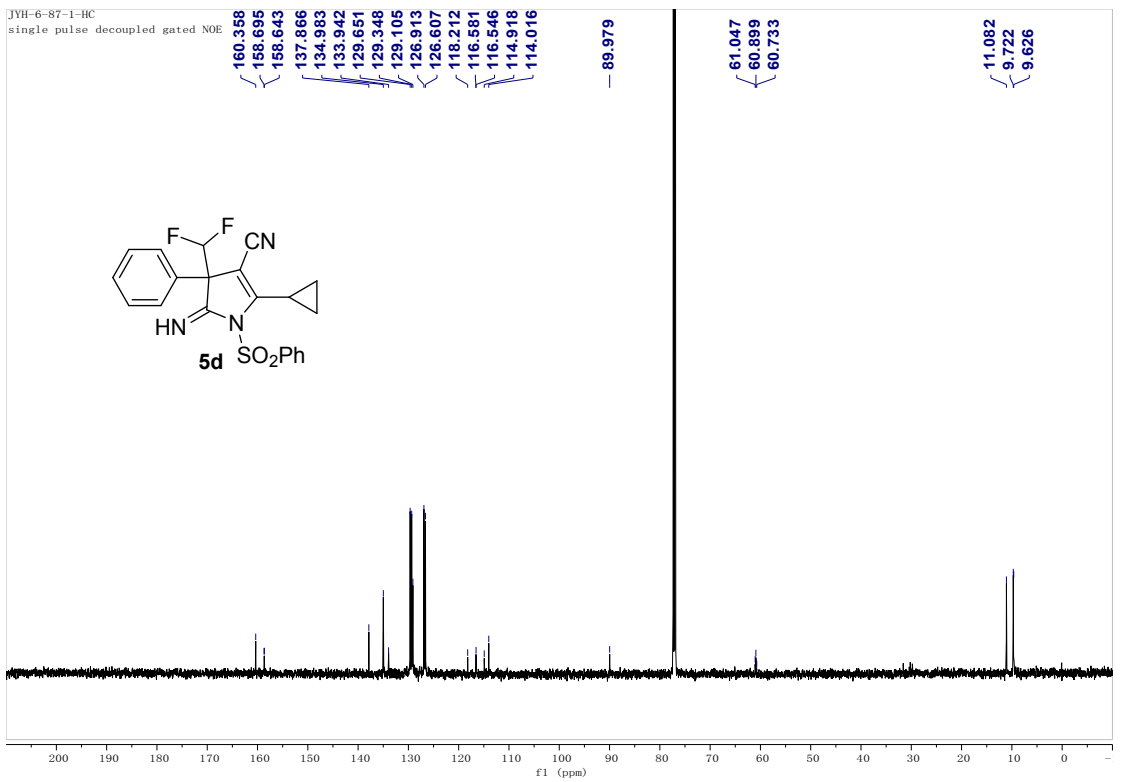

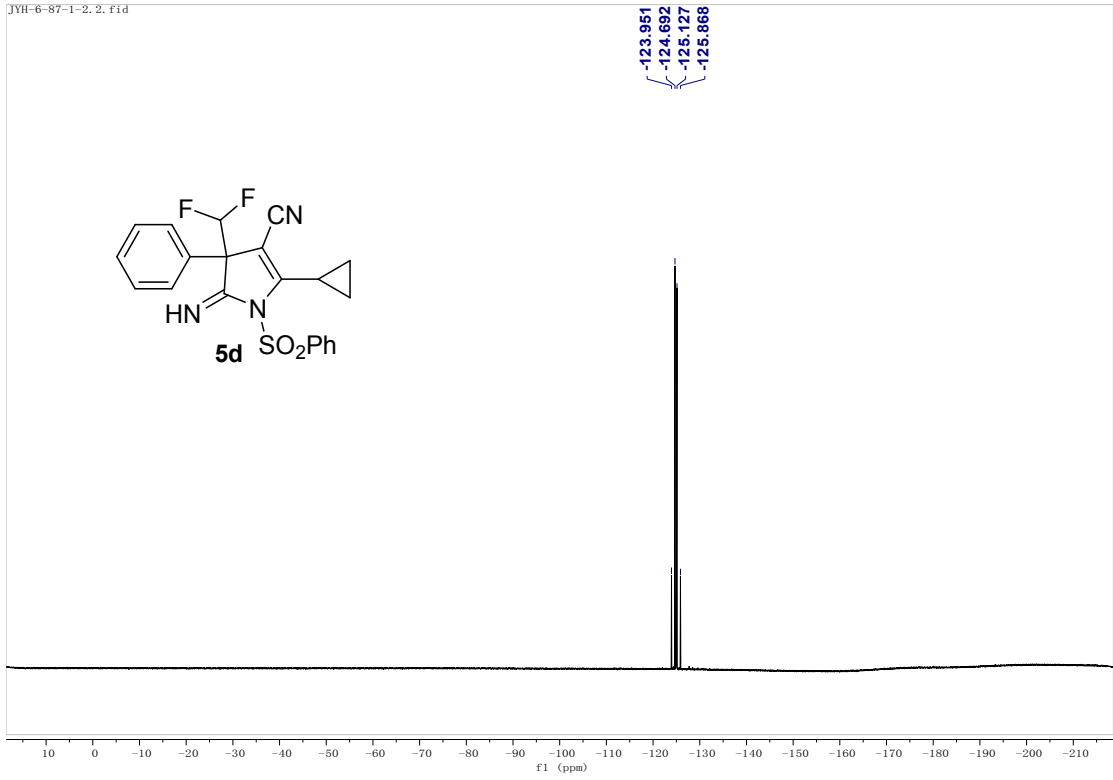

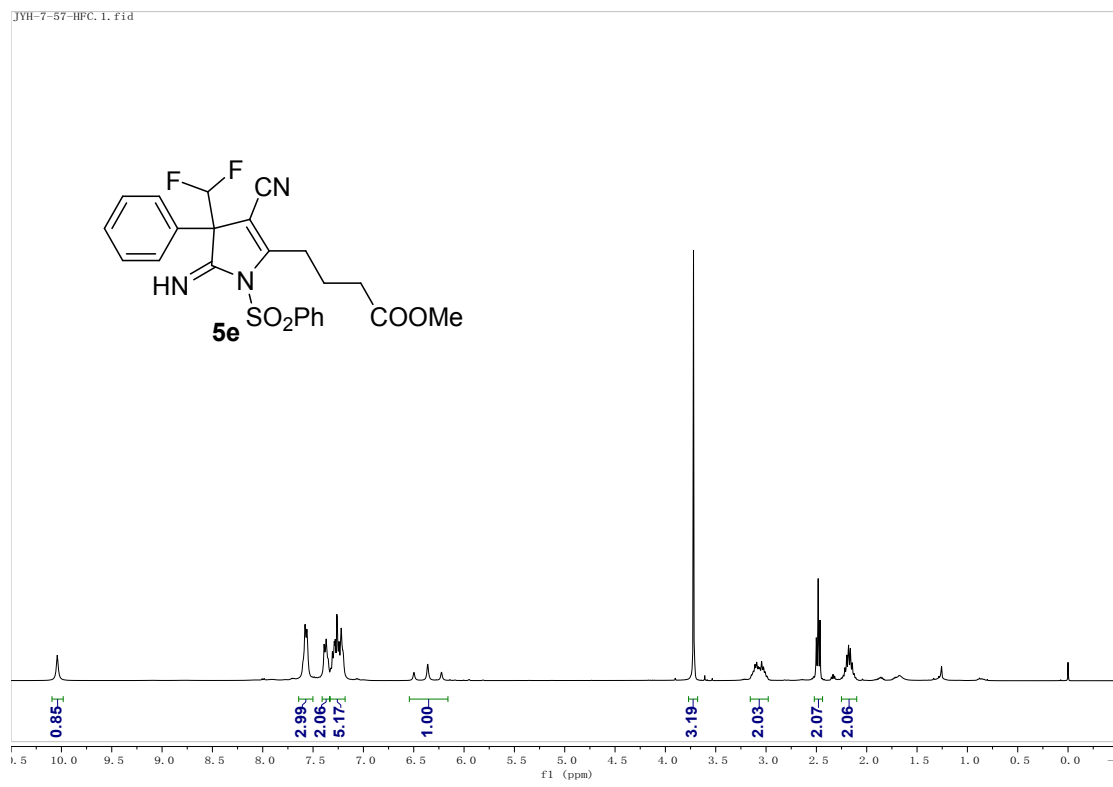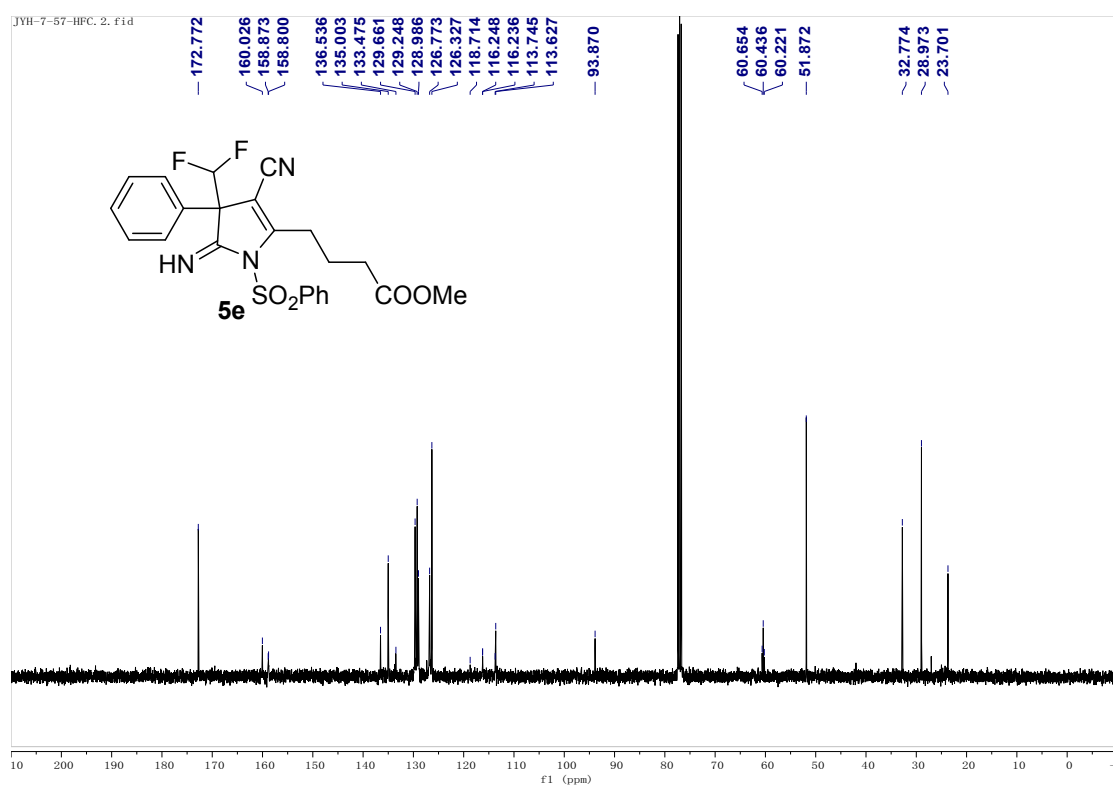

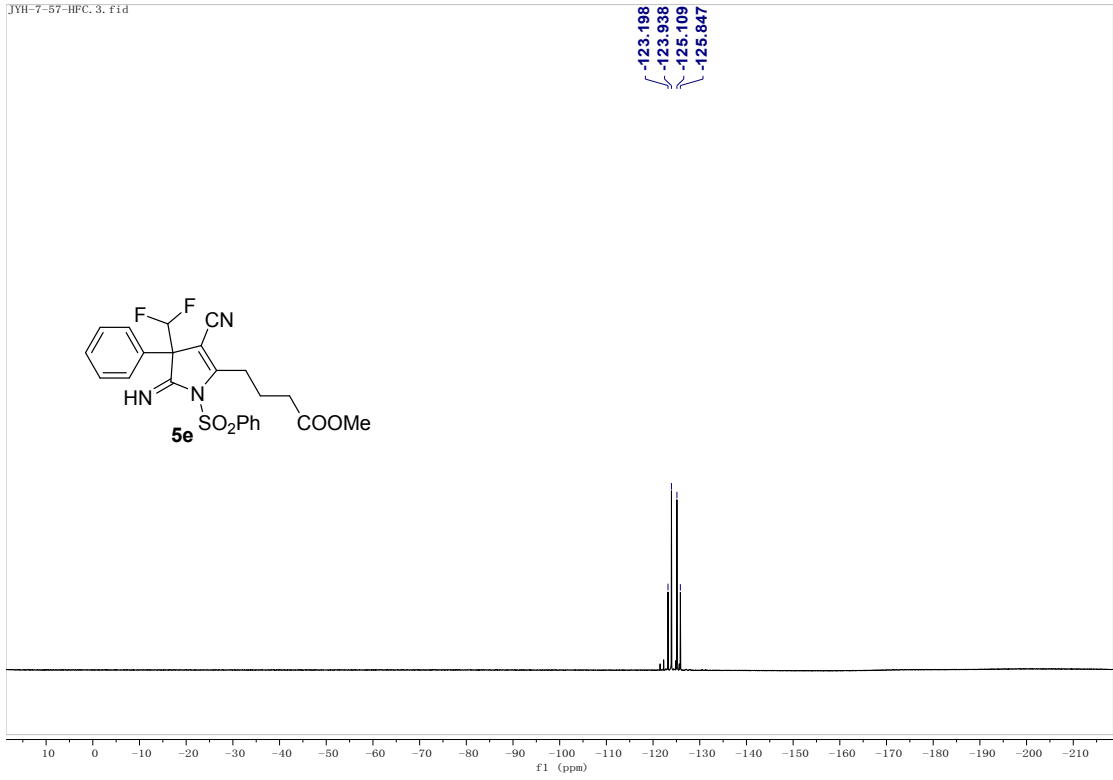

JYH-6-90-2.1.fid

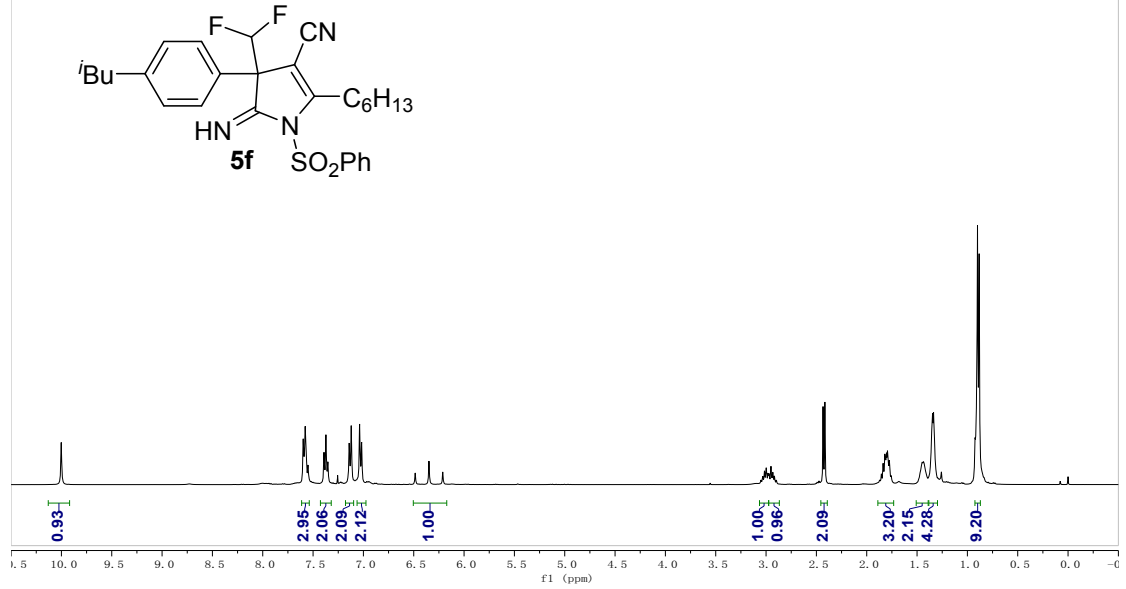

JYH-7-90-2-HC

single pulse decoupled gated NOE

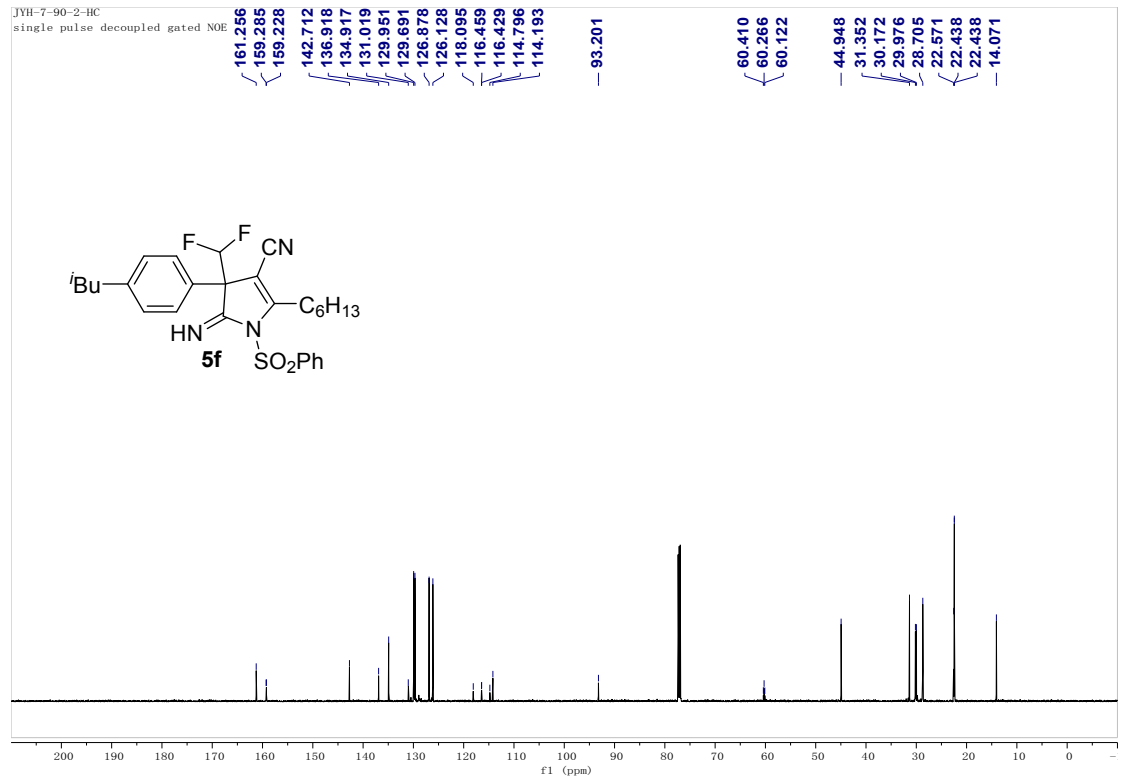



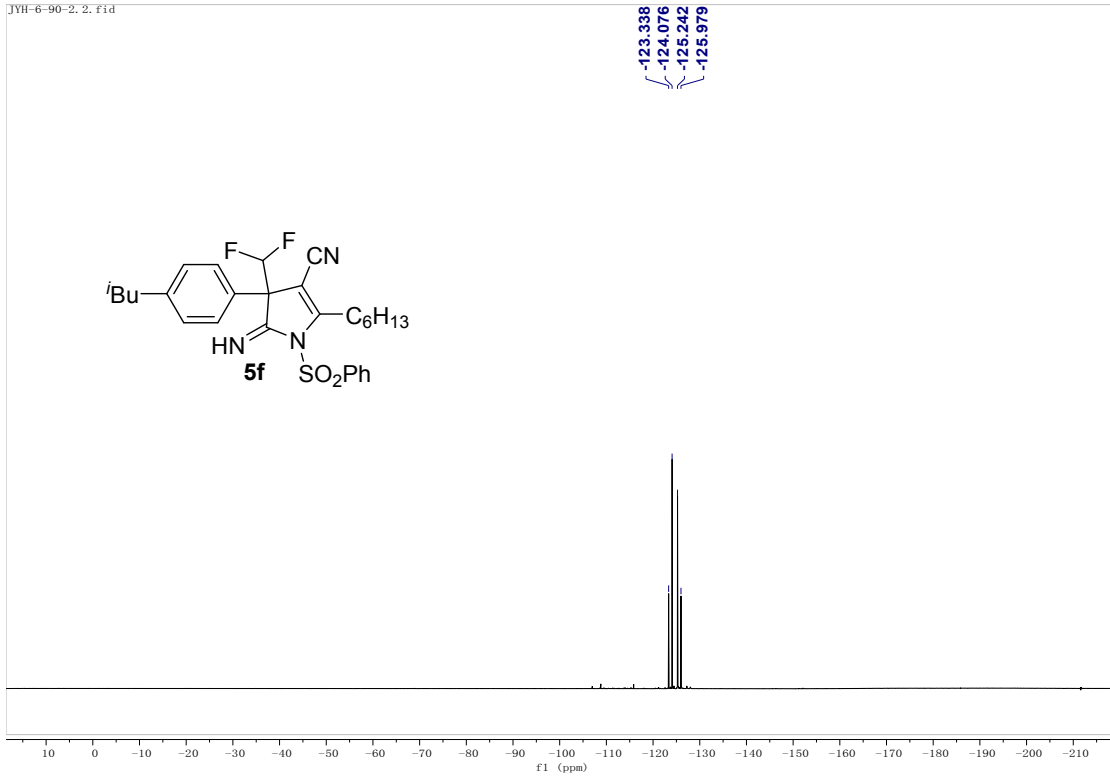

JYH-6-96-2-HFC. 1. fid

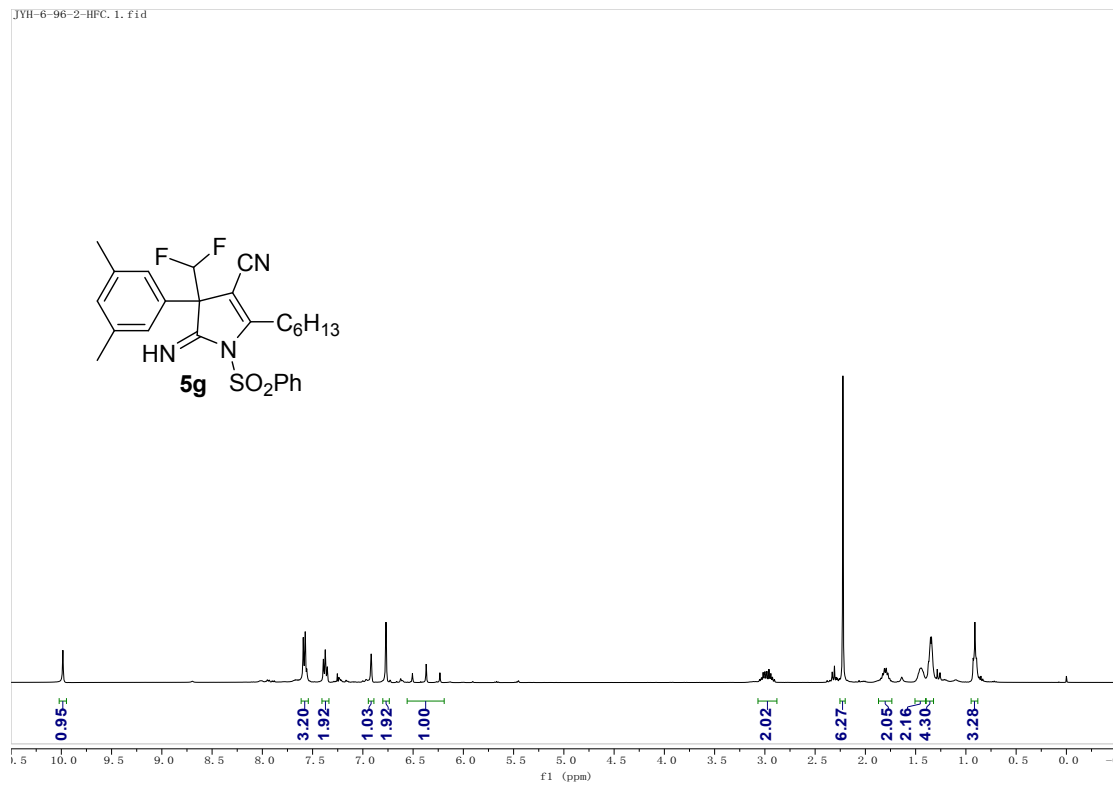

JYH-6-96-2.3. fid

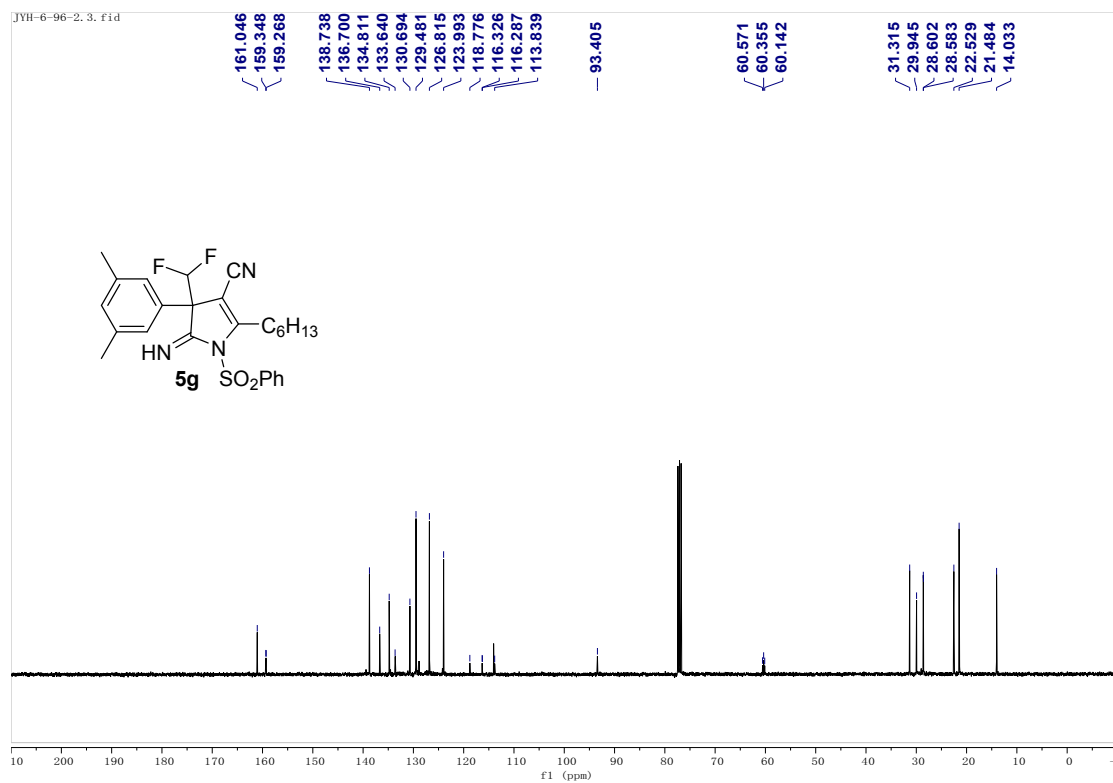

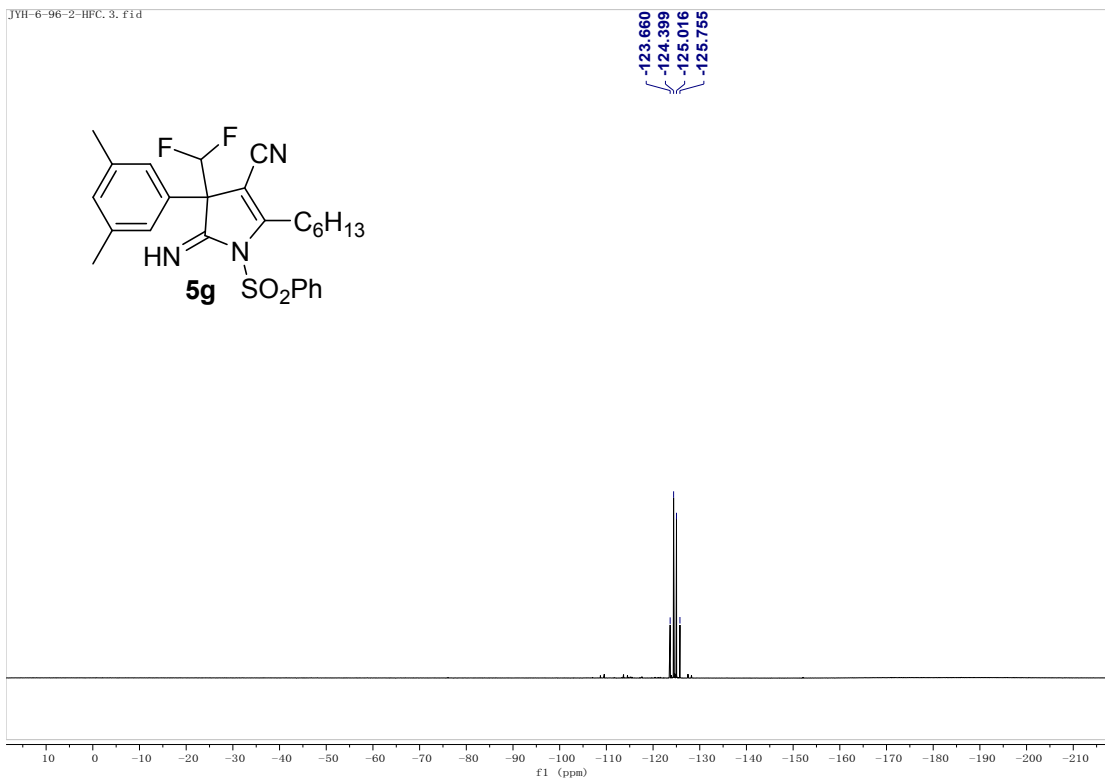

jyh-6-93-2-2.1.fid

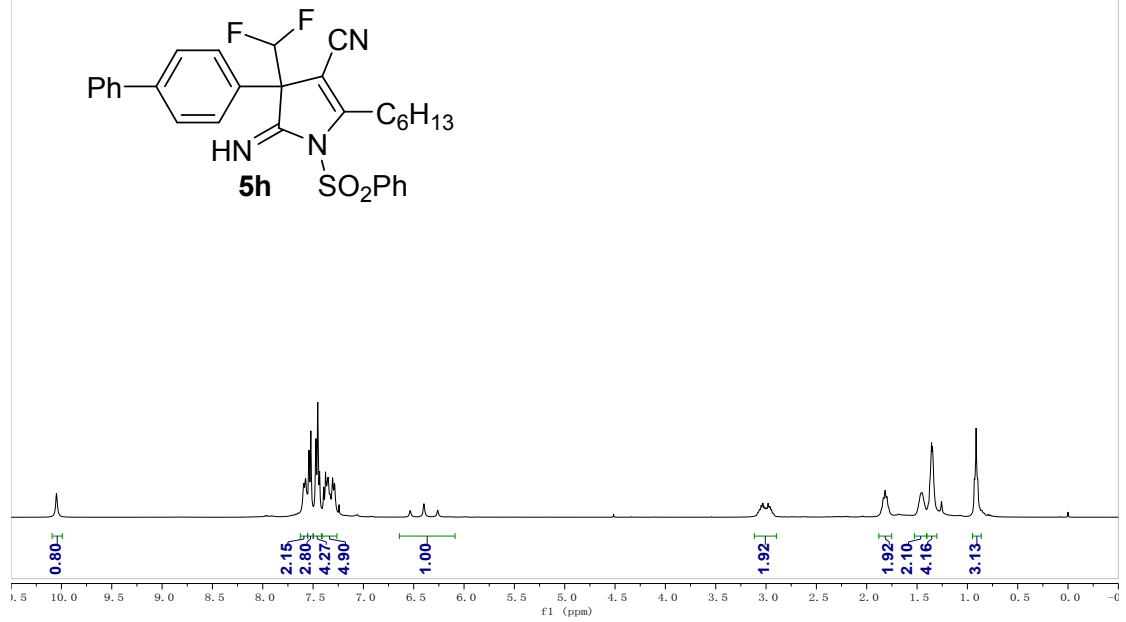

jyh-6-93-2-2.2.fid

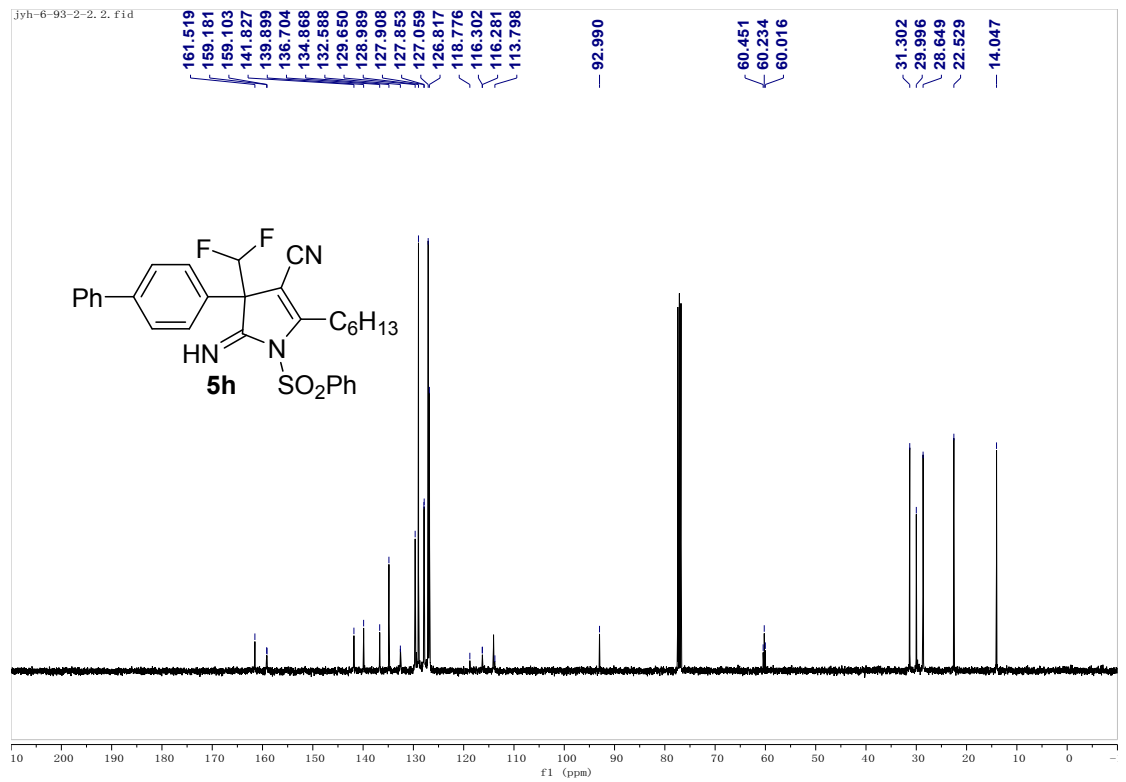

jyh-6-98-2-2.3.fid

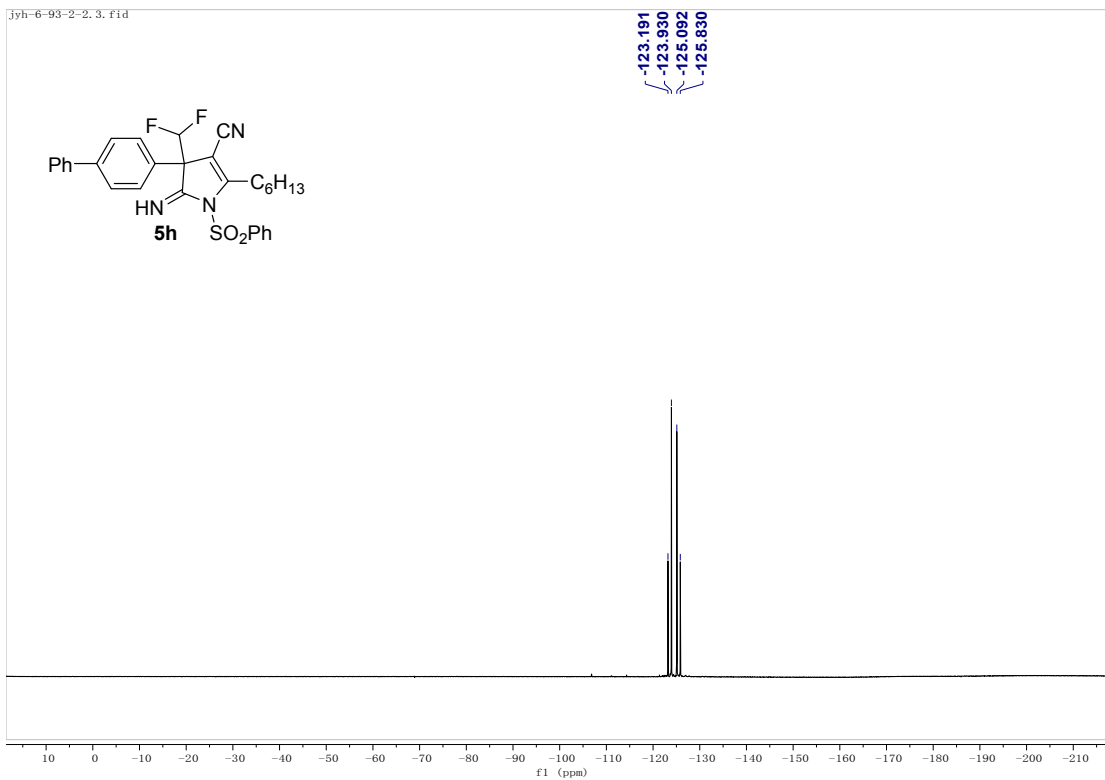

JYH-6-93-1.1.fid

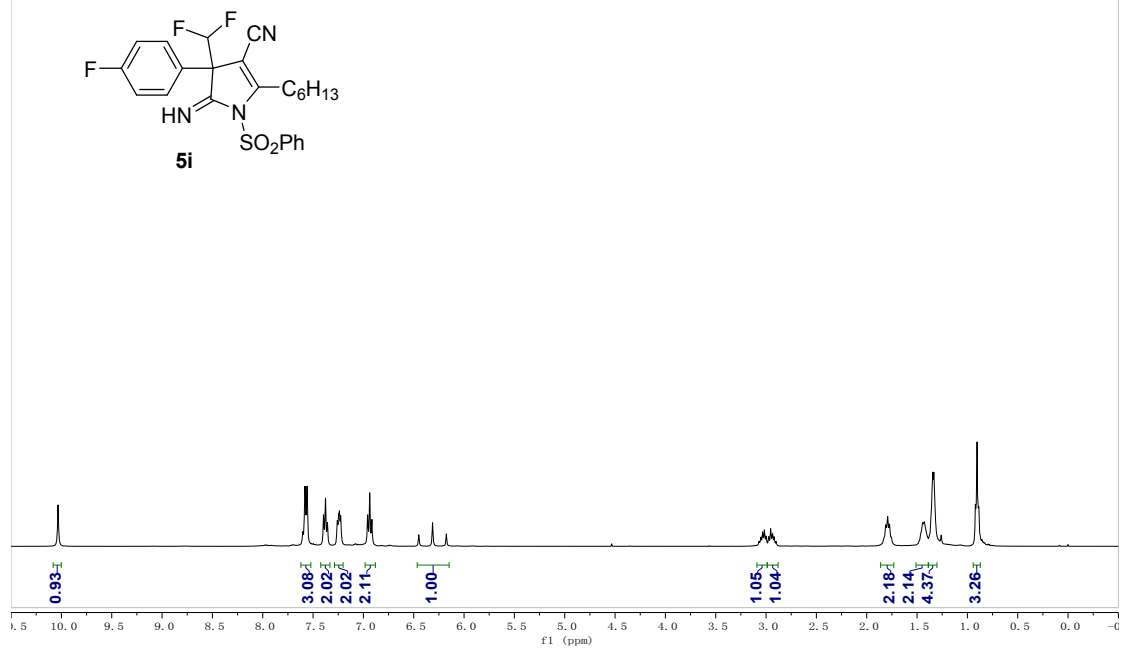

JYH-6-93-1.3.fid

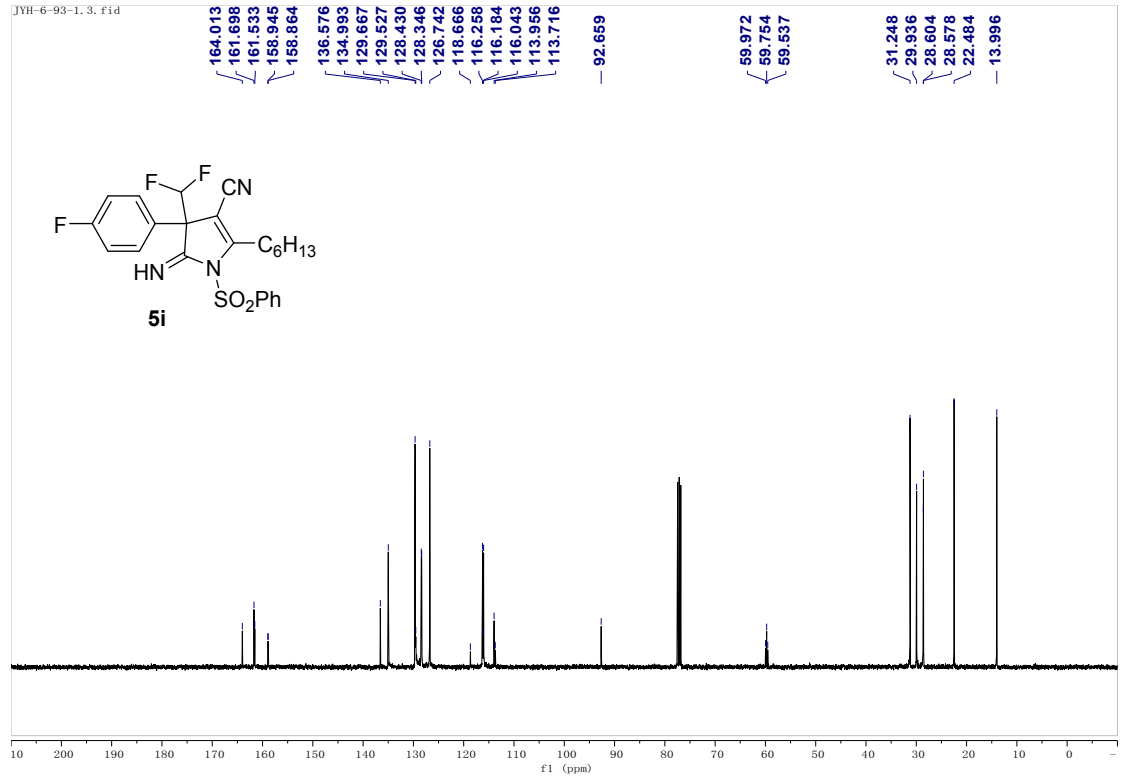

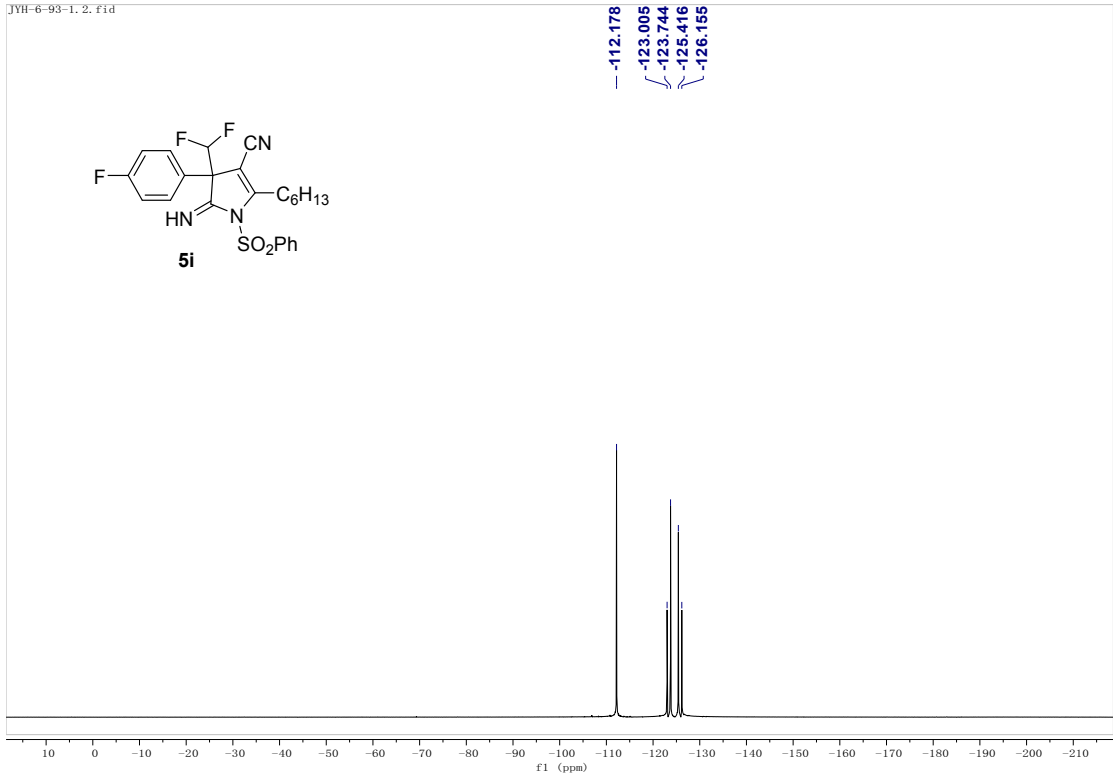

JYH-6-86-1.1.fid

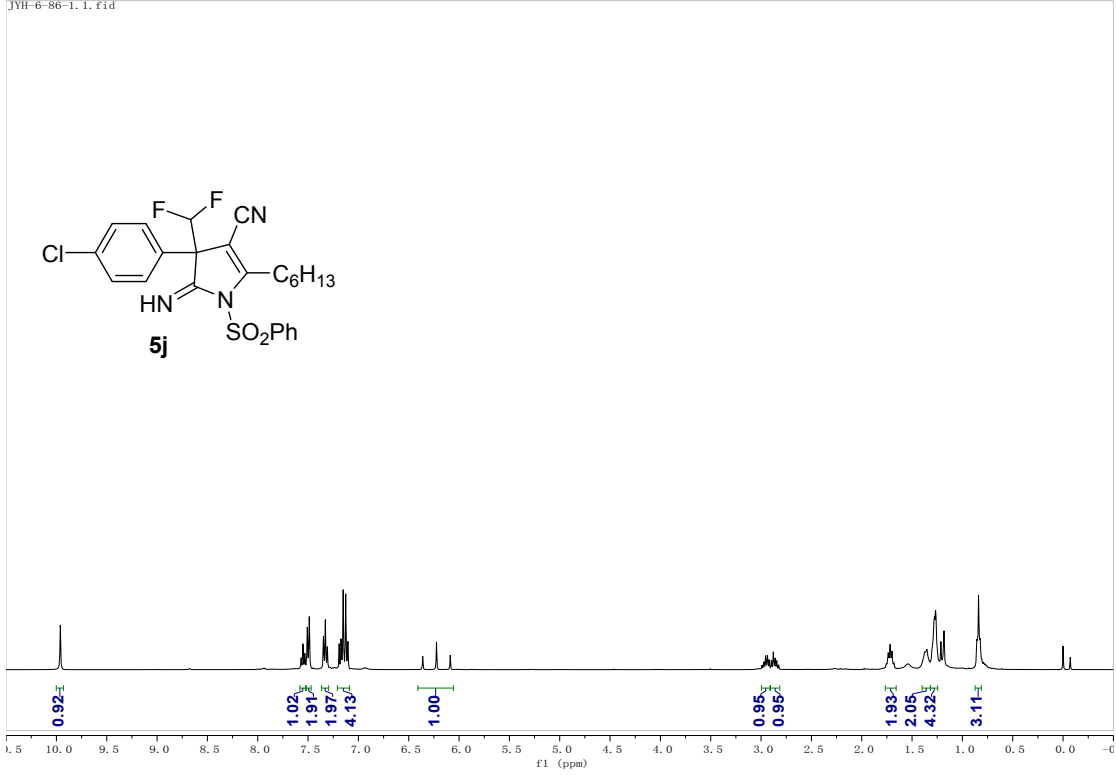

JYH-6-86-1.3.fid

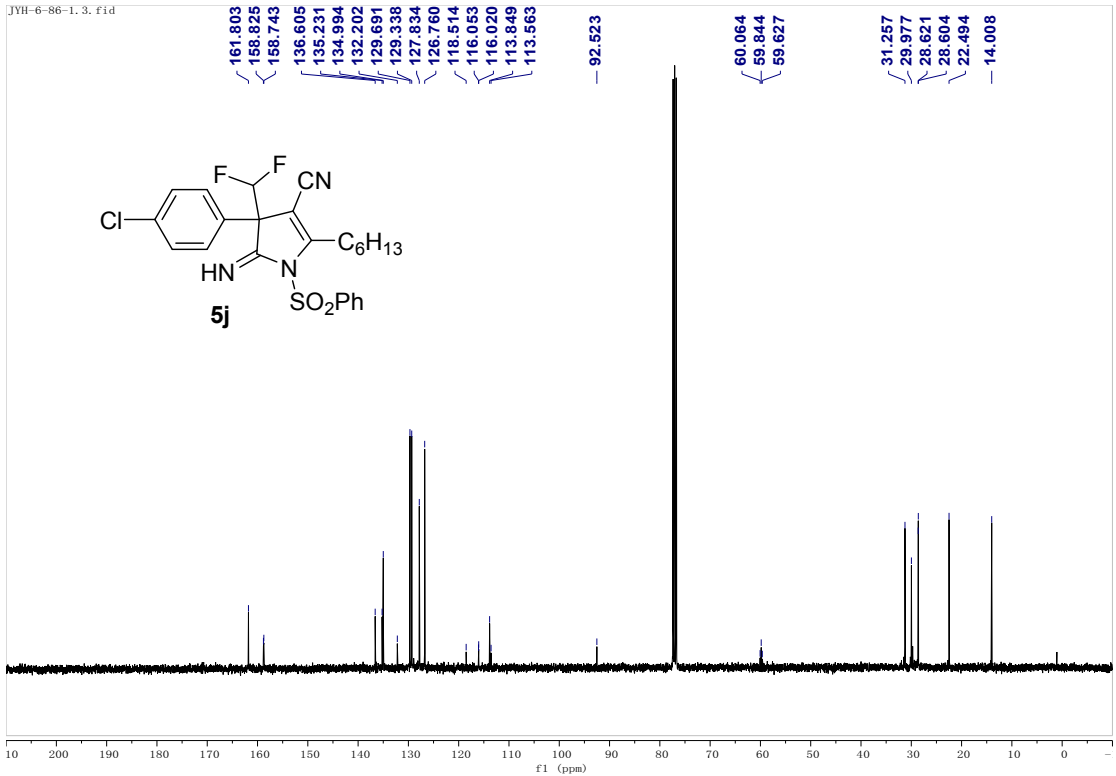



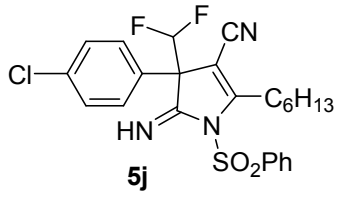

-123.034  
-123.775  
-125.192  
-125.933

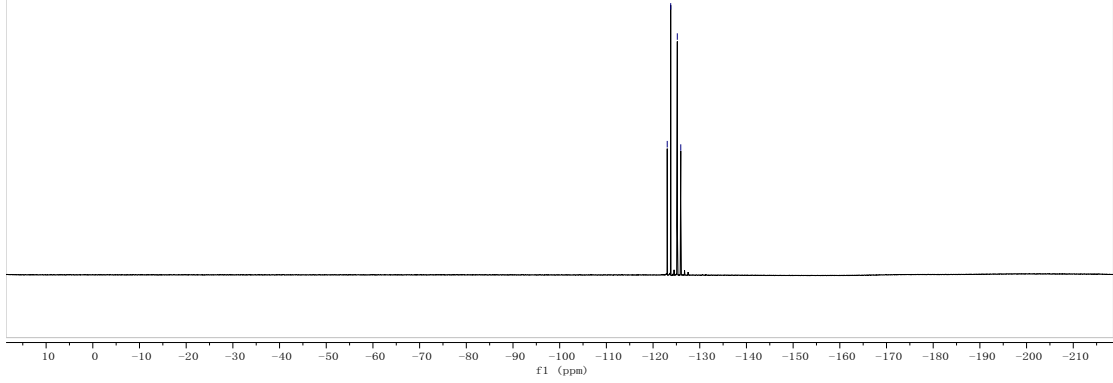

JYH-6-86-2.1.fid

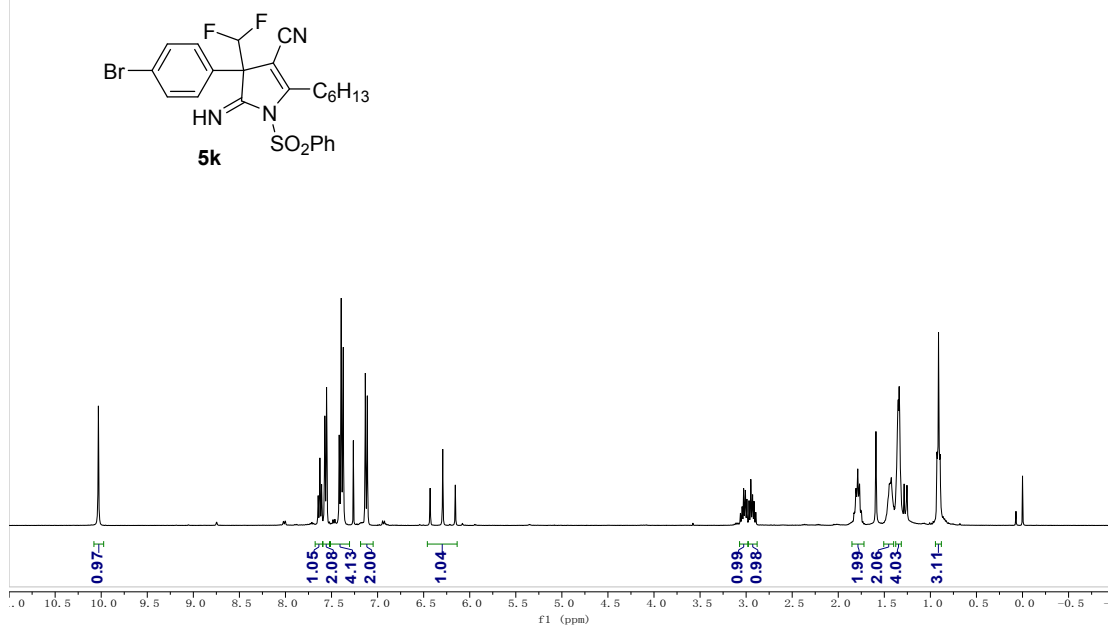

JYH-6-86-2.3.fid

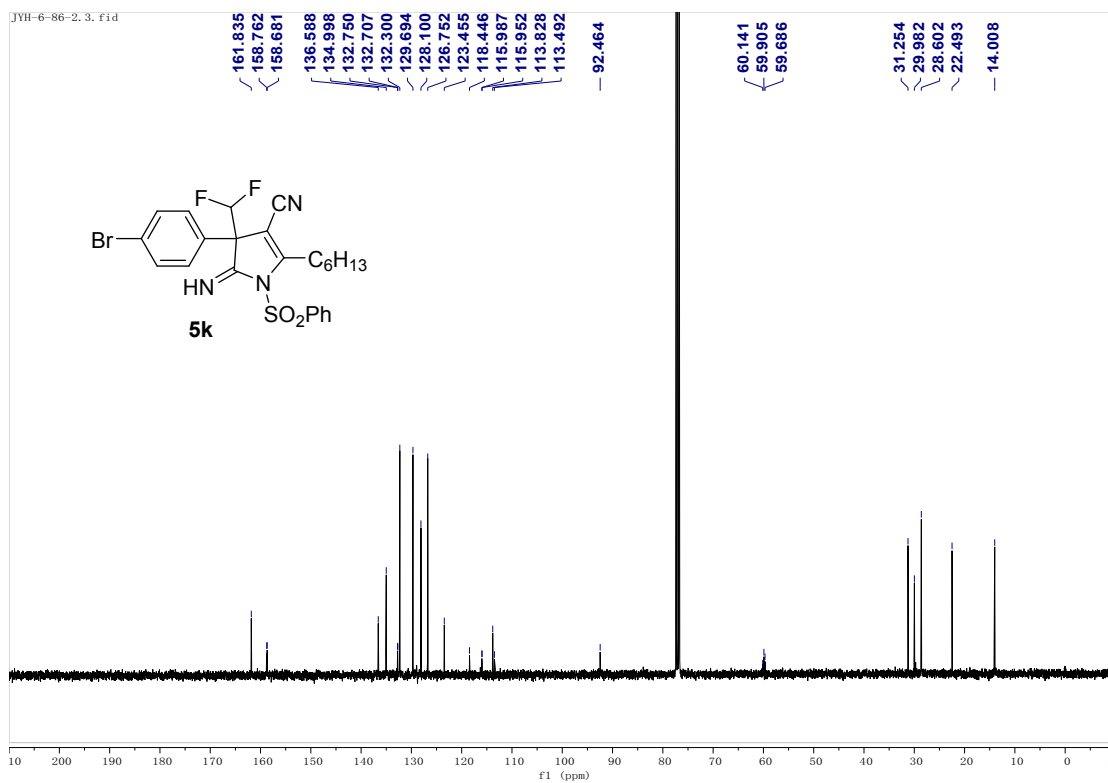

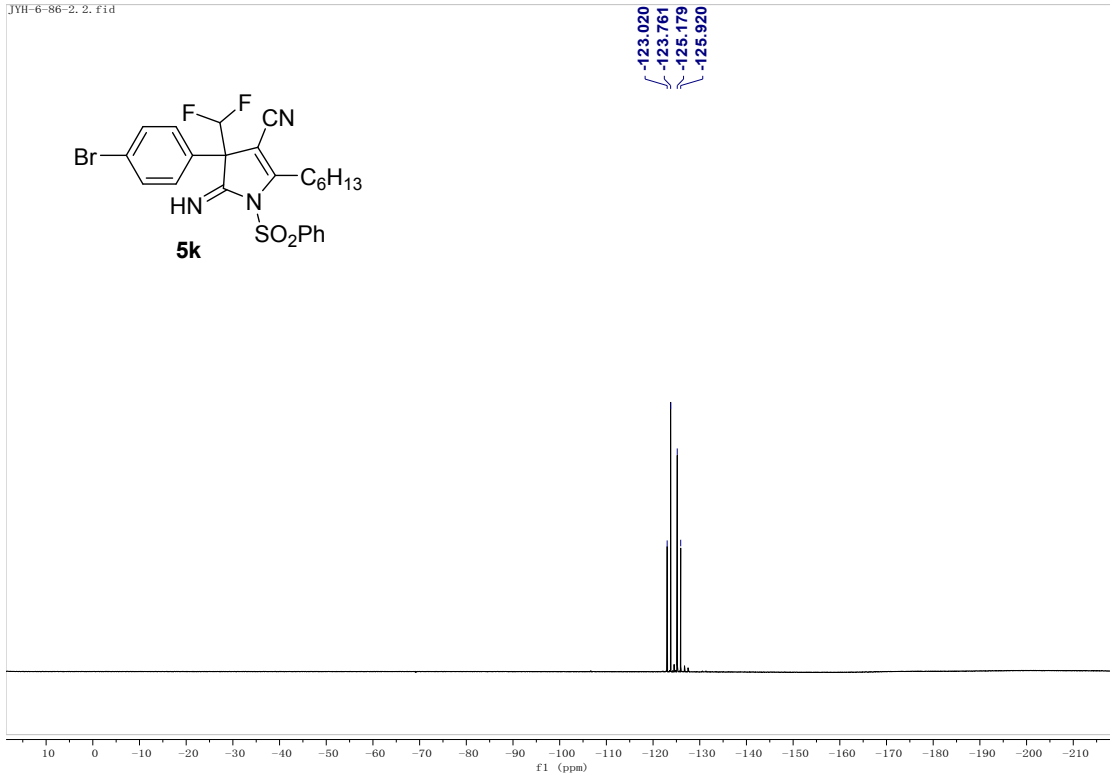

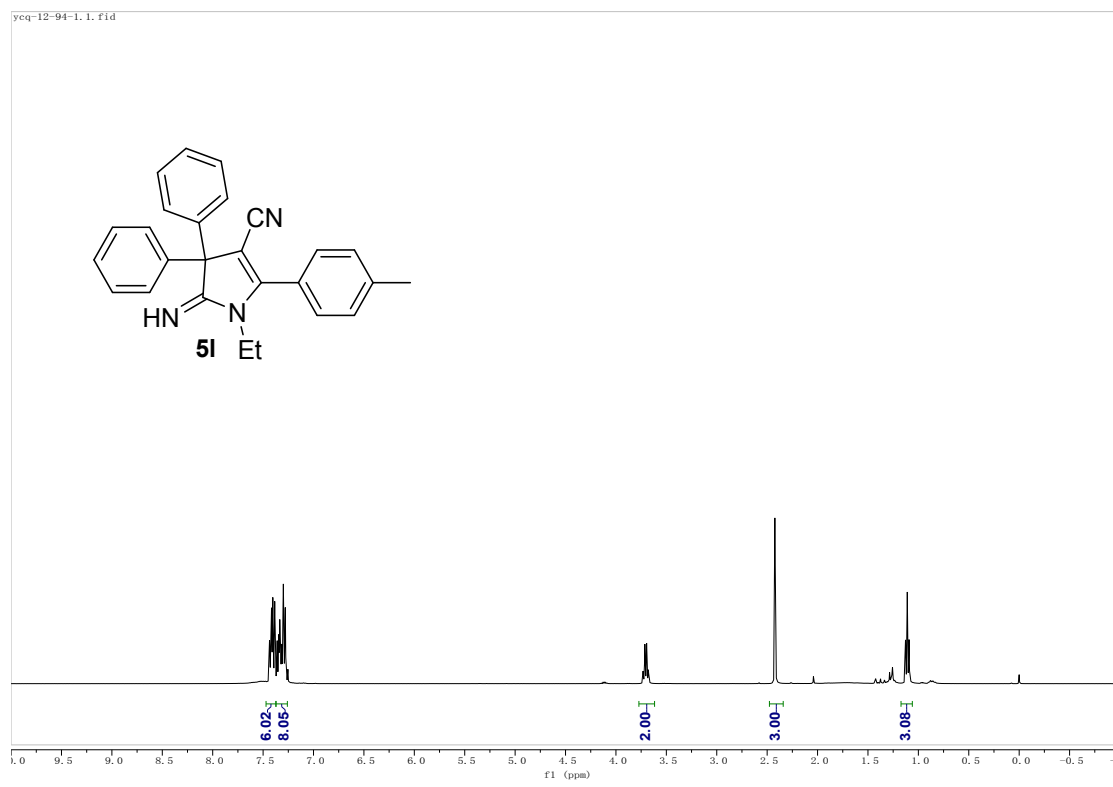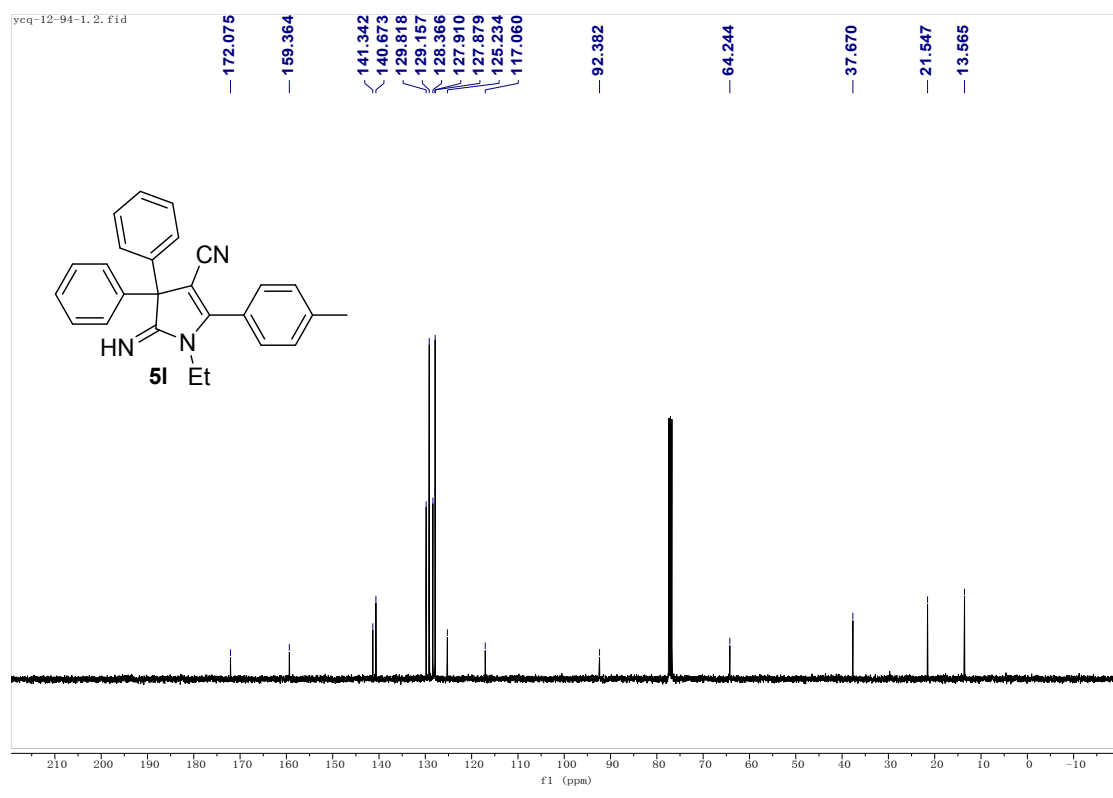

ycq-13-8-1  
single\_pulse

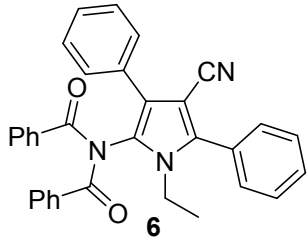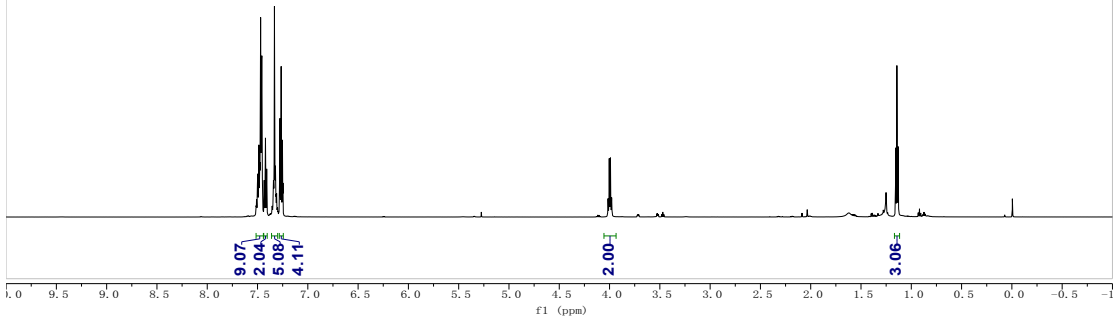

ycq-13-8-1  
single\_pulse decoupled gated NOE

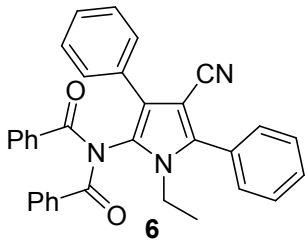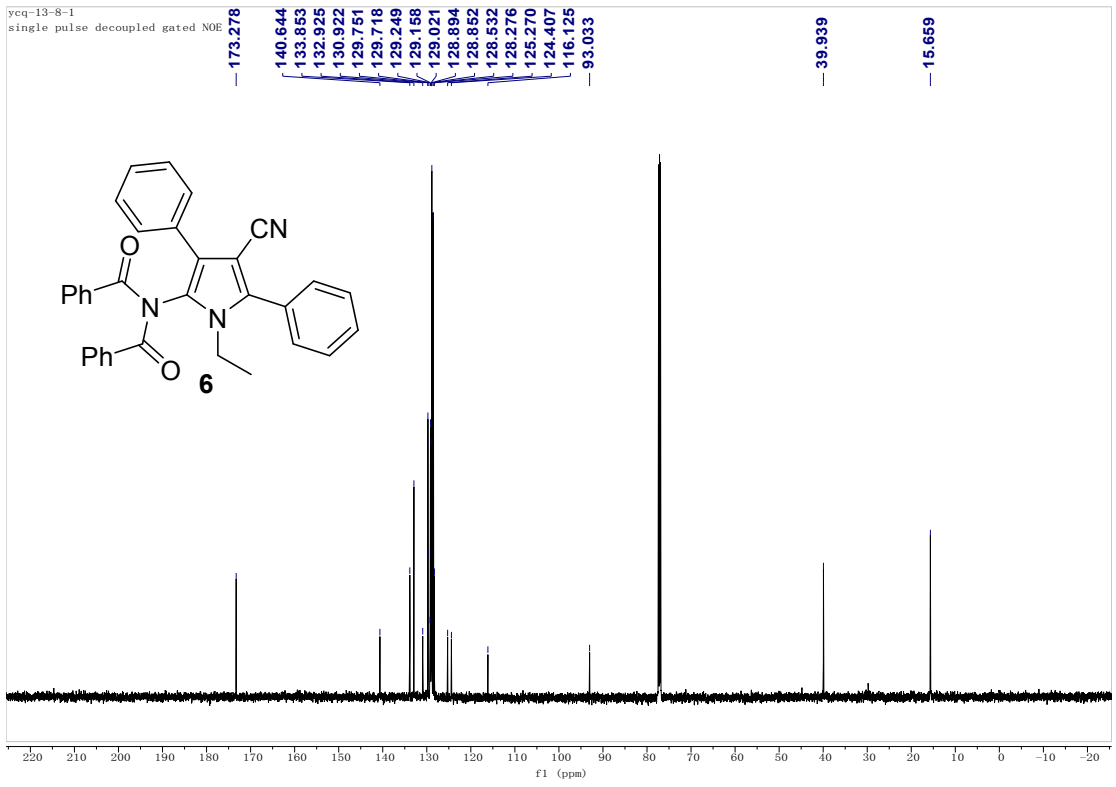

YCQ-12-140-1  
single\_pulse

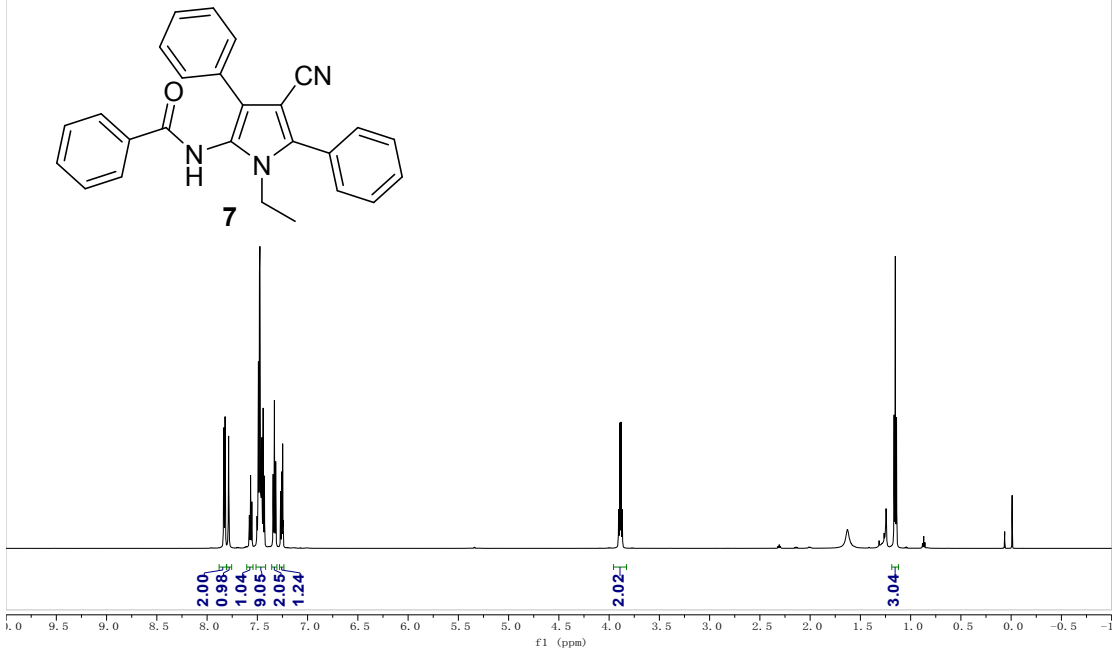

ycq-12-140-1  
single\_pulse decoupled gated NOE

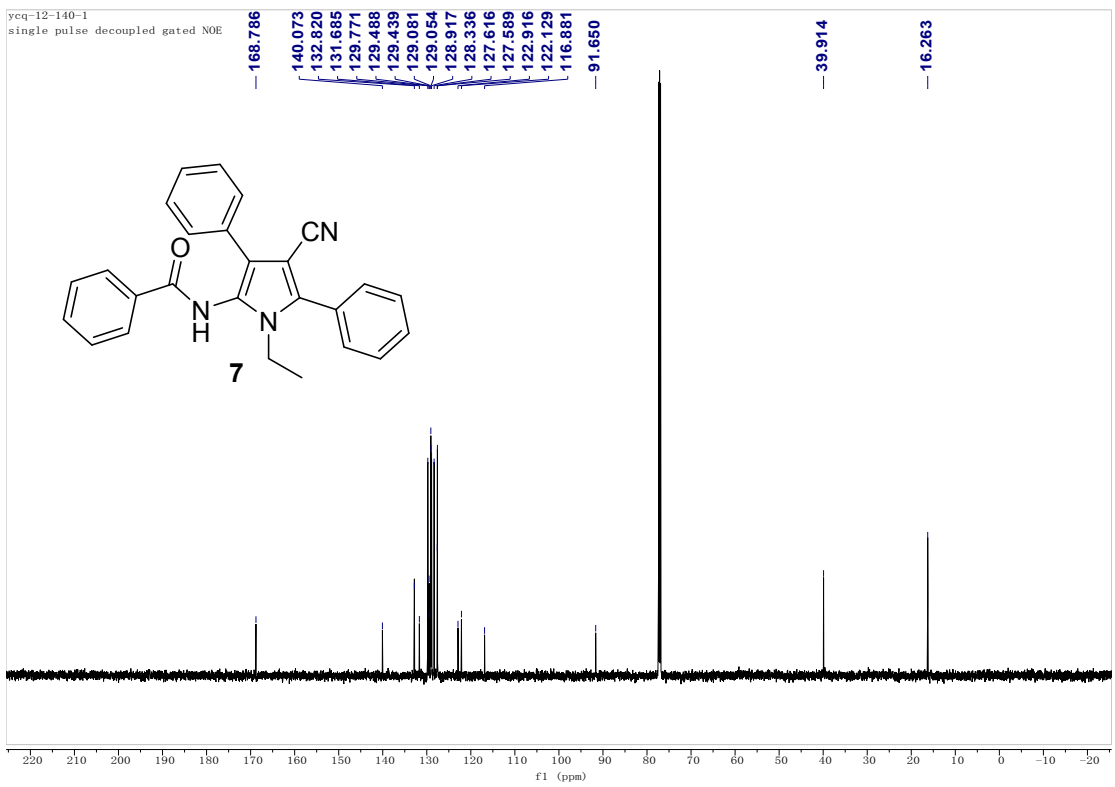

yeq-13-2s. 1. fid

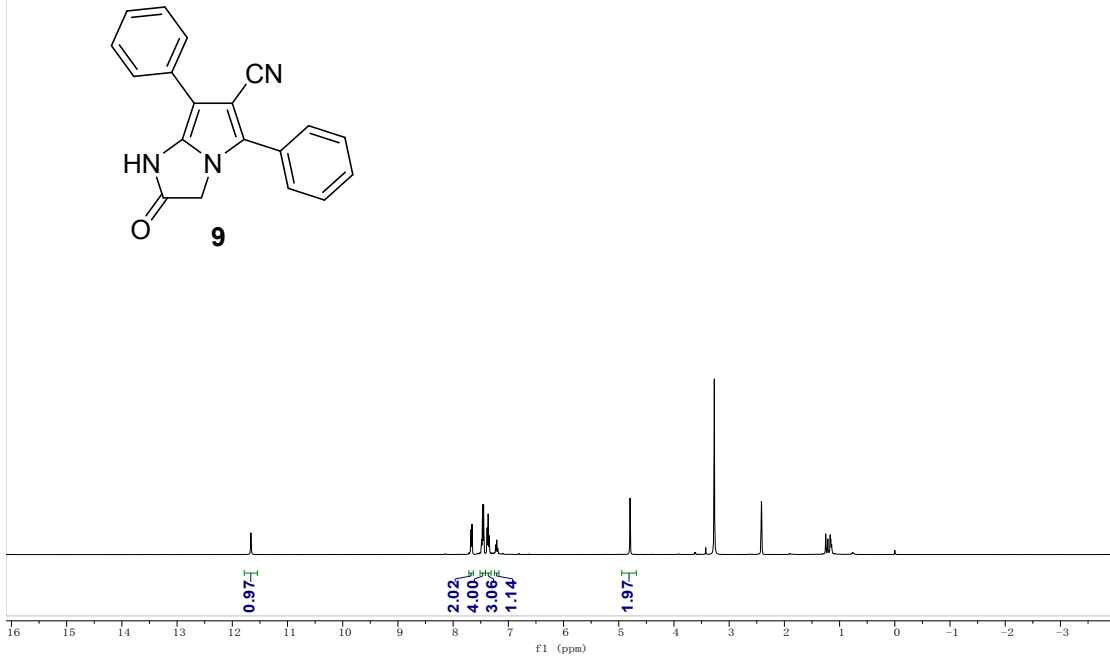

yeq-13-2s. 2. fid

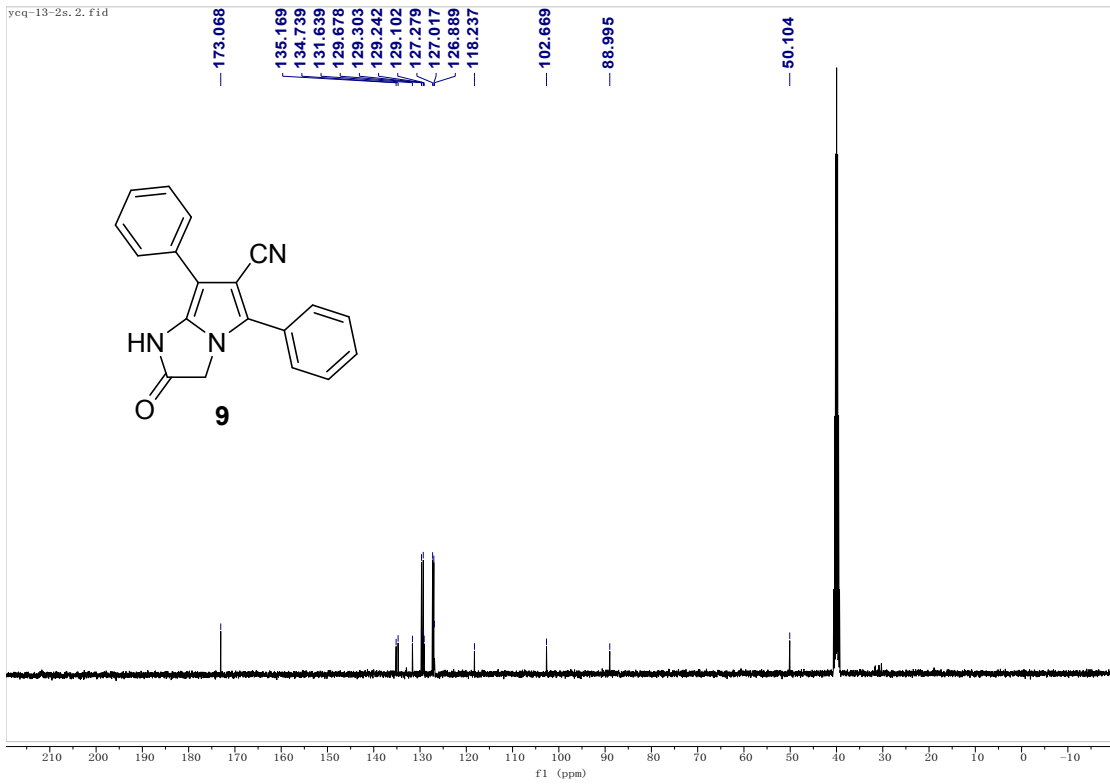

ycq-13-77-1  
single\_pulse

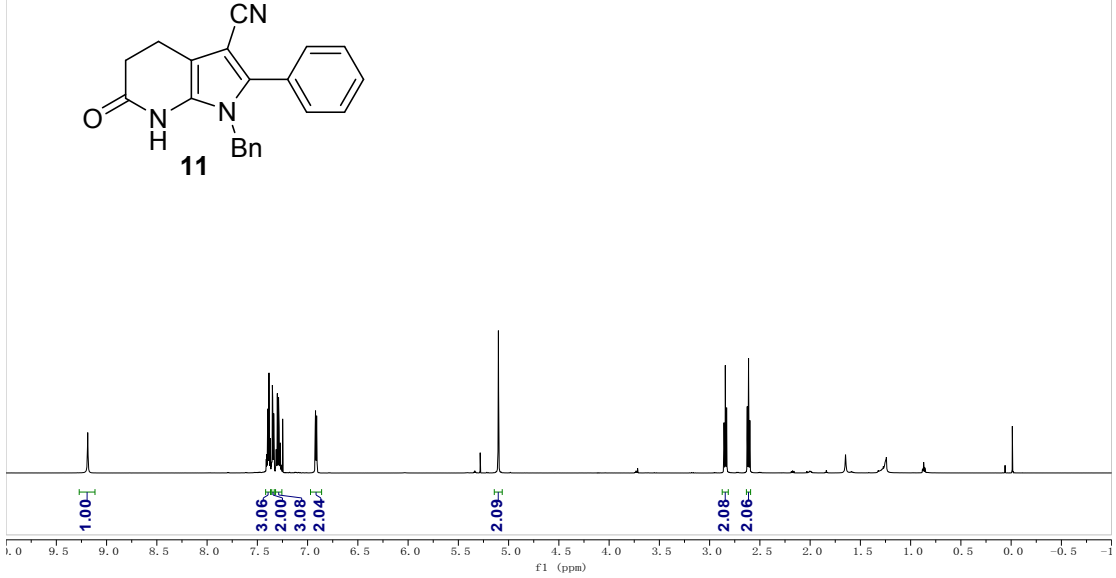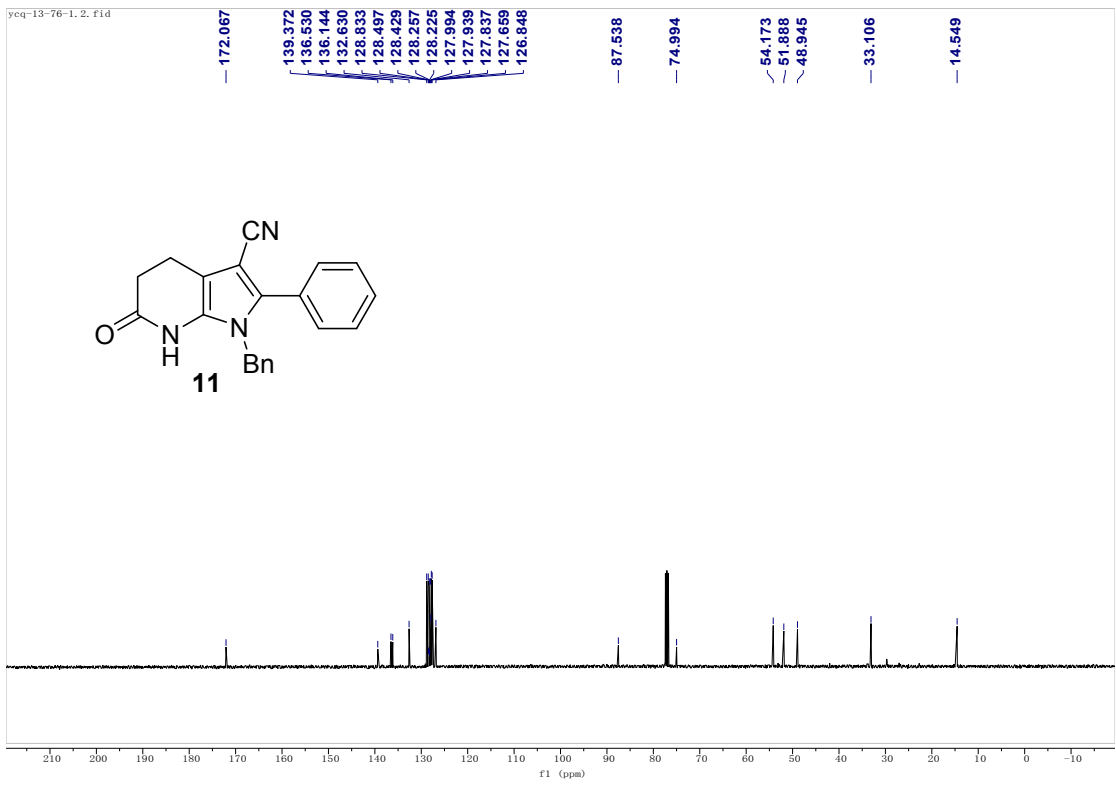



ycq-13-4-1.1.Fid

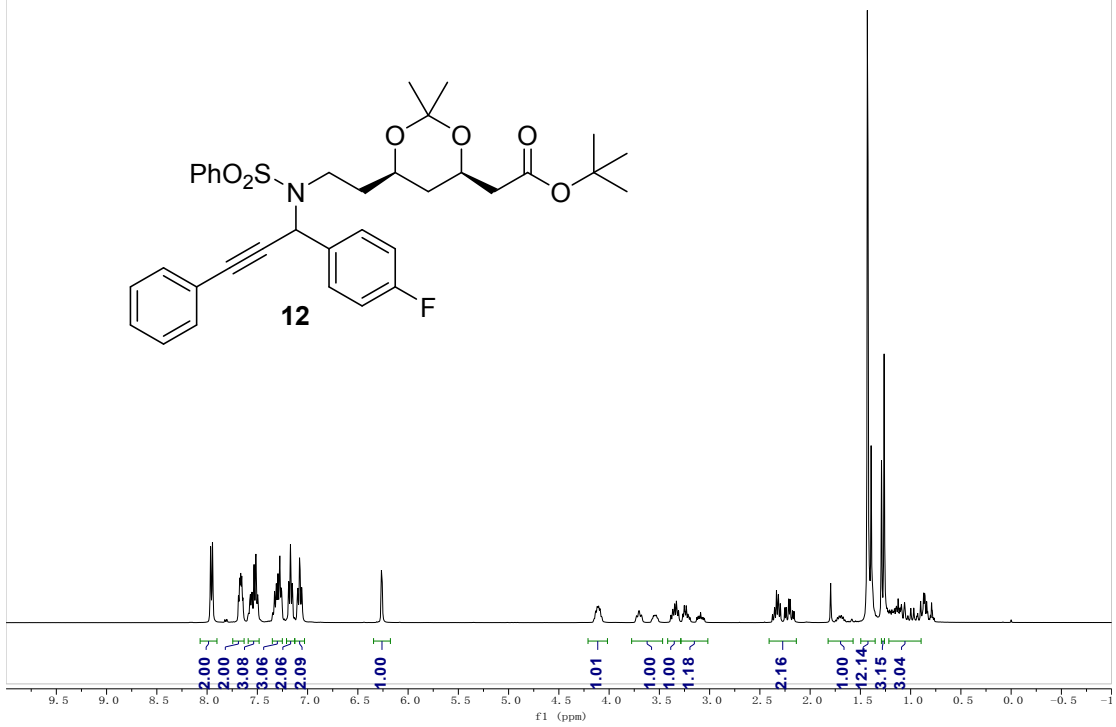

ycq-13-4-1.3.Fid

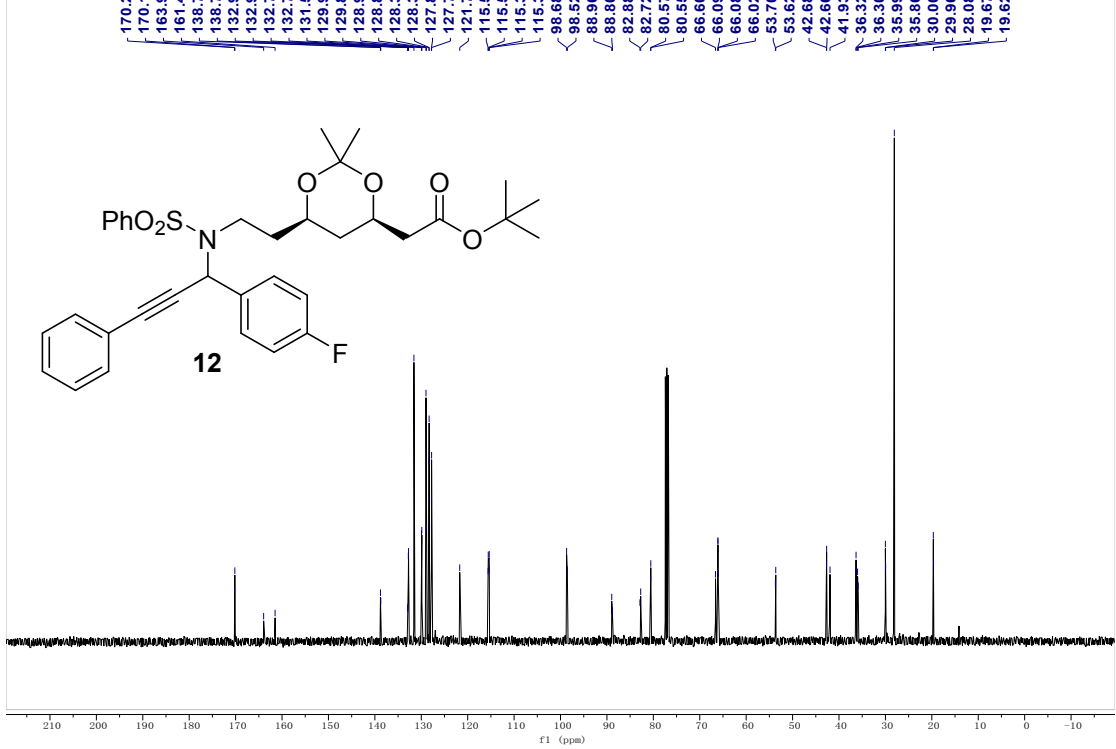

ycq-13-4-1.2.fid

-113.358  
-113.634

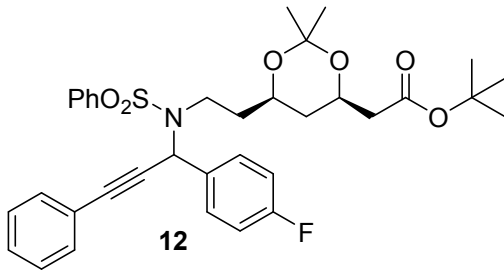

12

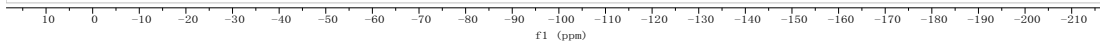

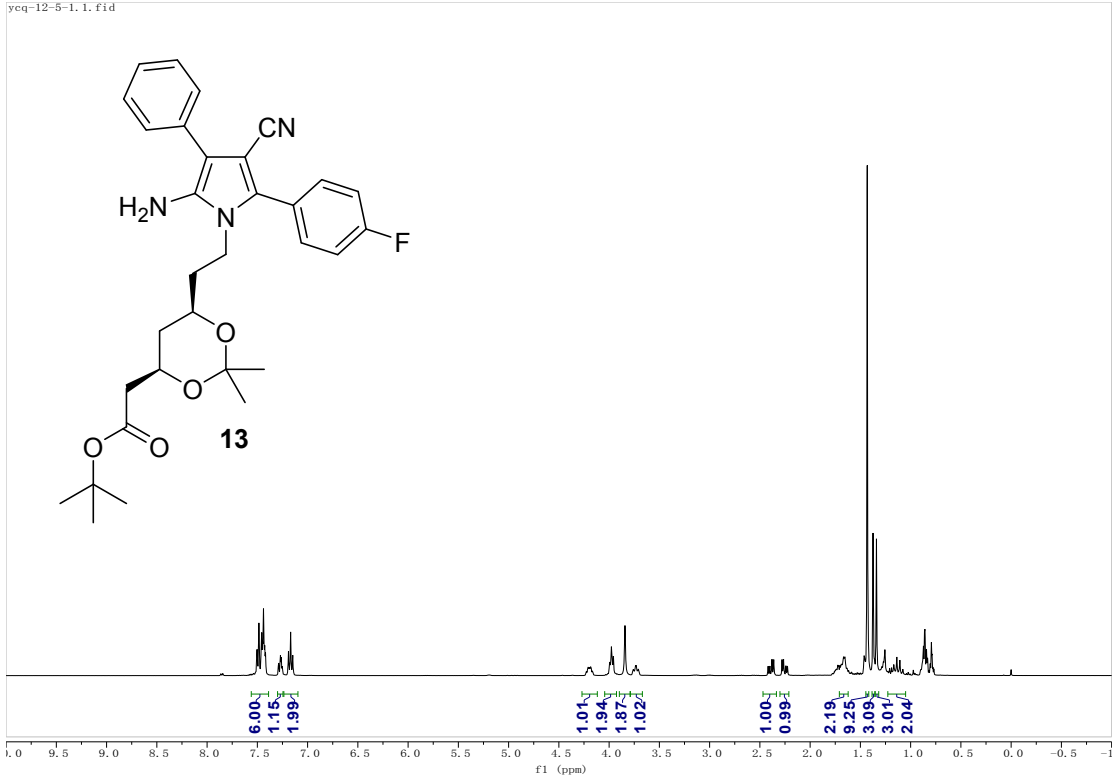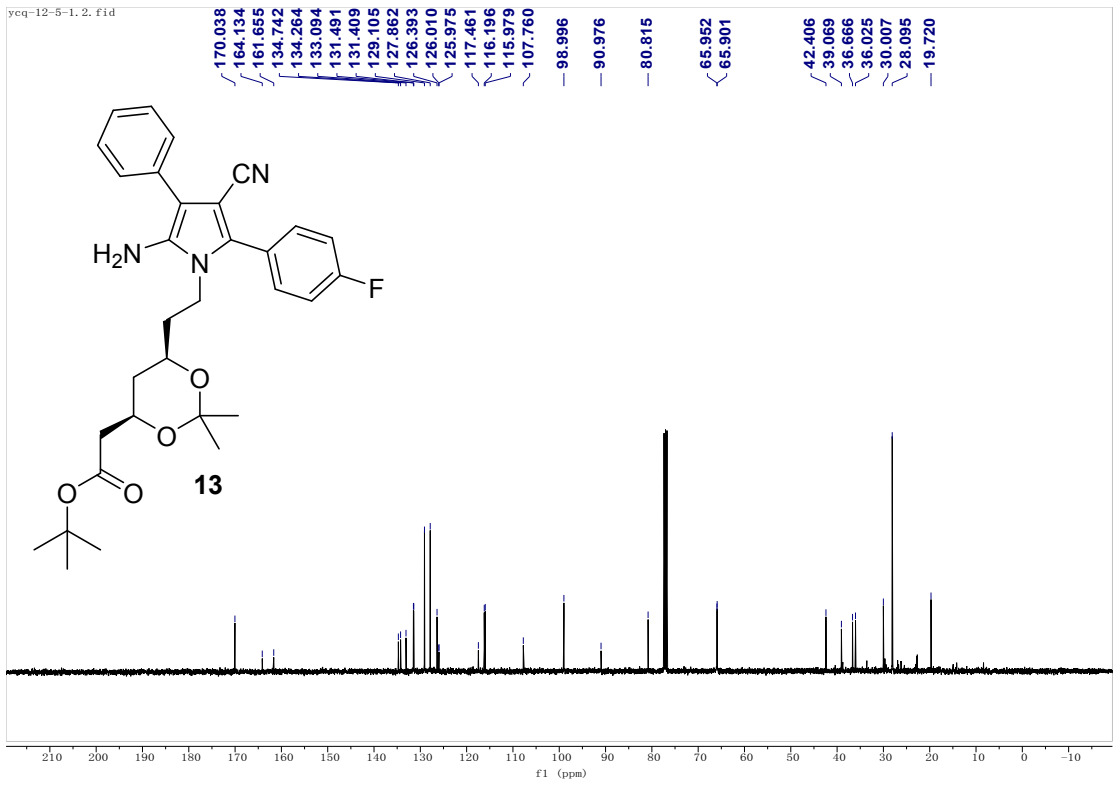

ycq-12-5-1.3.fid

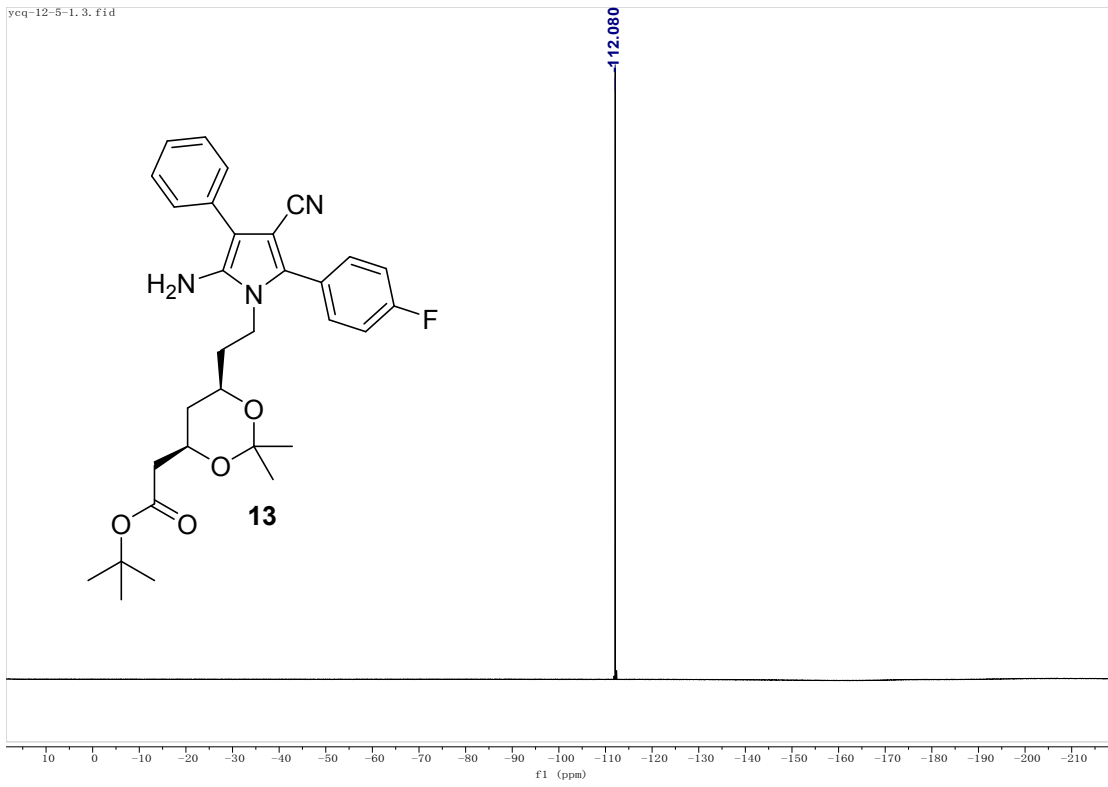

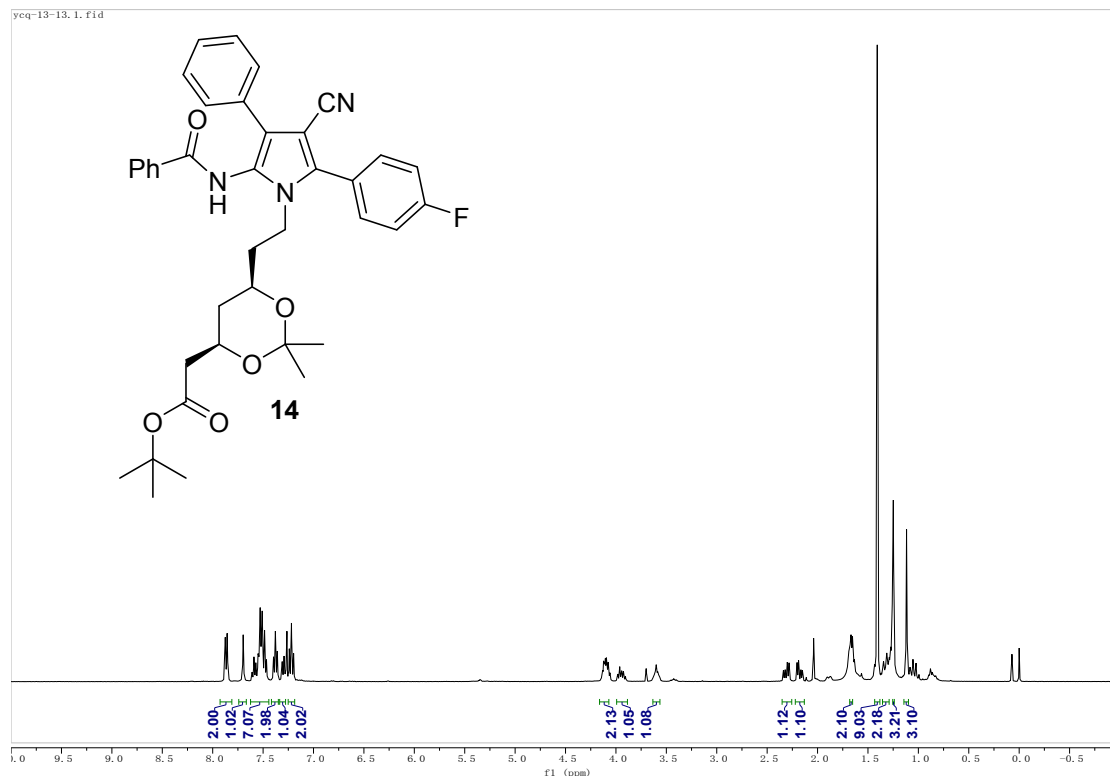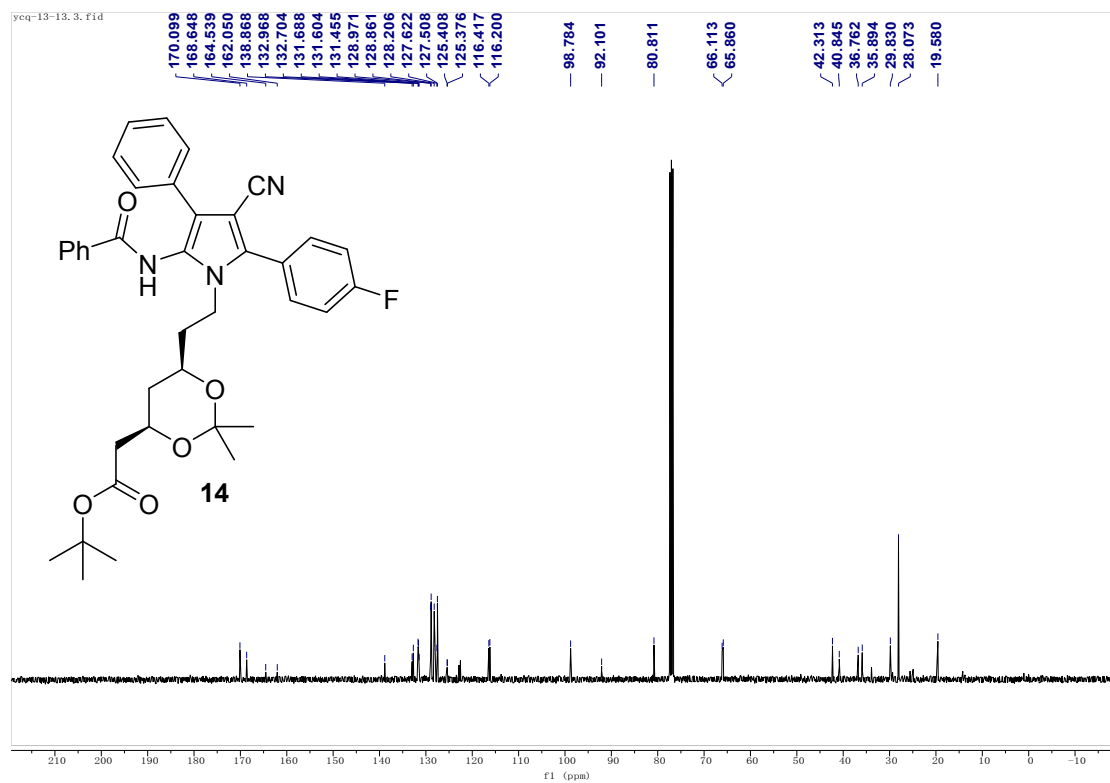

ycq-13-13.2.Fid

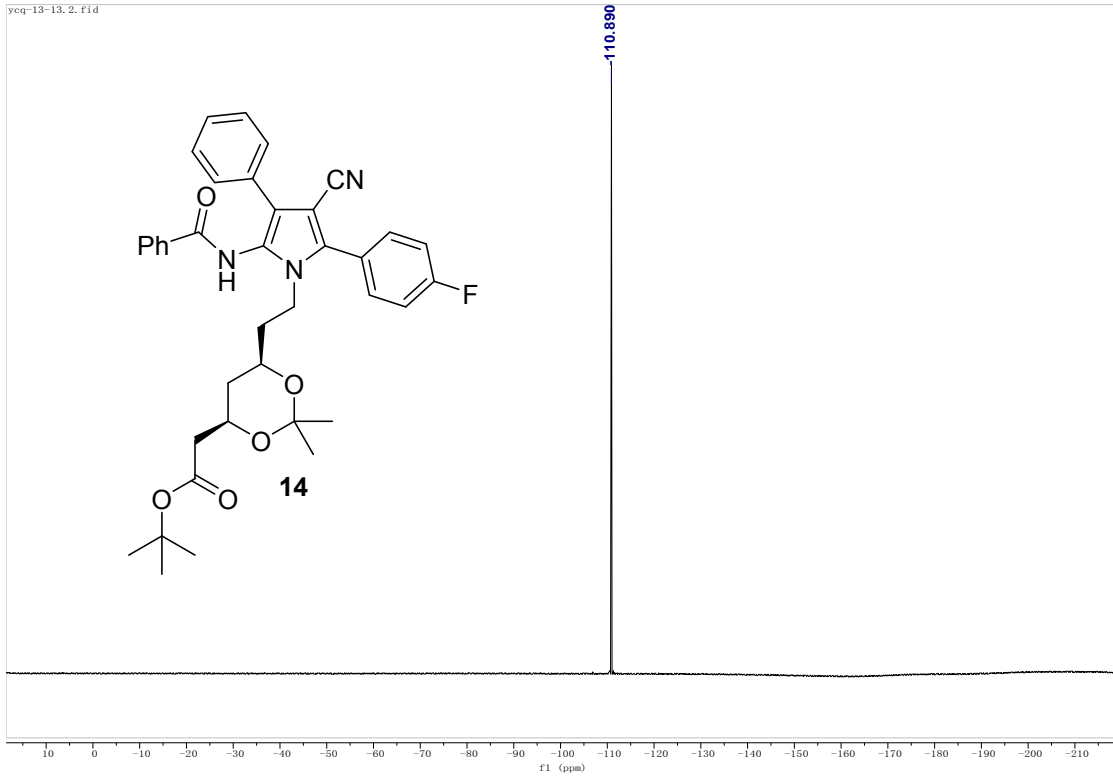

ycq-13-15-4.1.fid

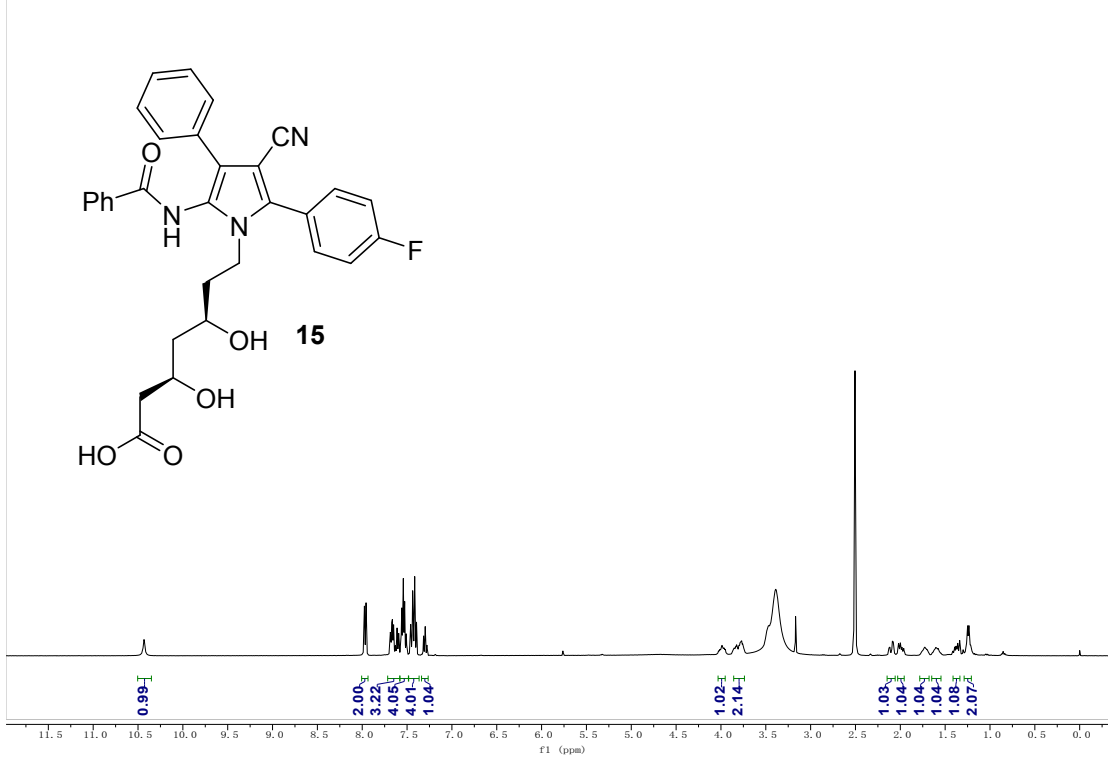

ycq-13-15-7

single pulse decoupled gated NOE

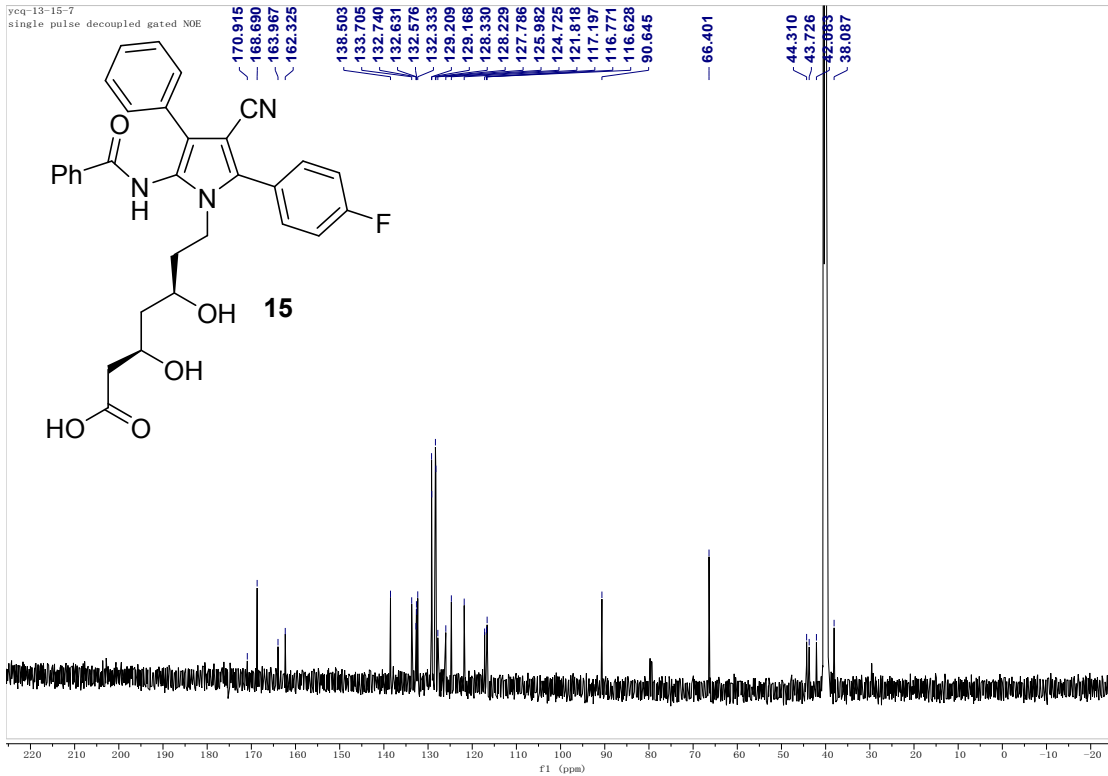

ycq-13-15-1HF. 2. f1d

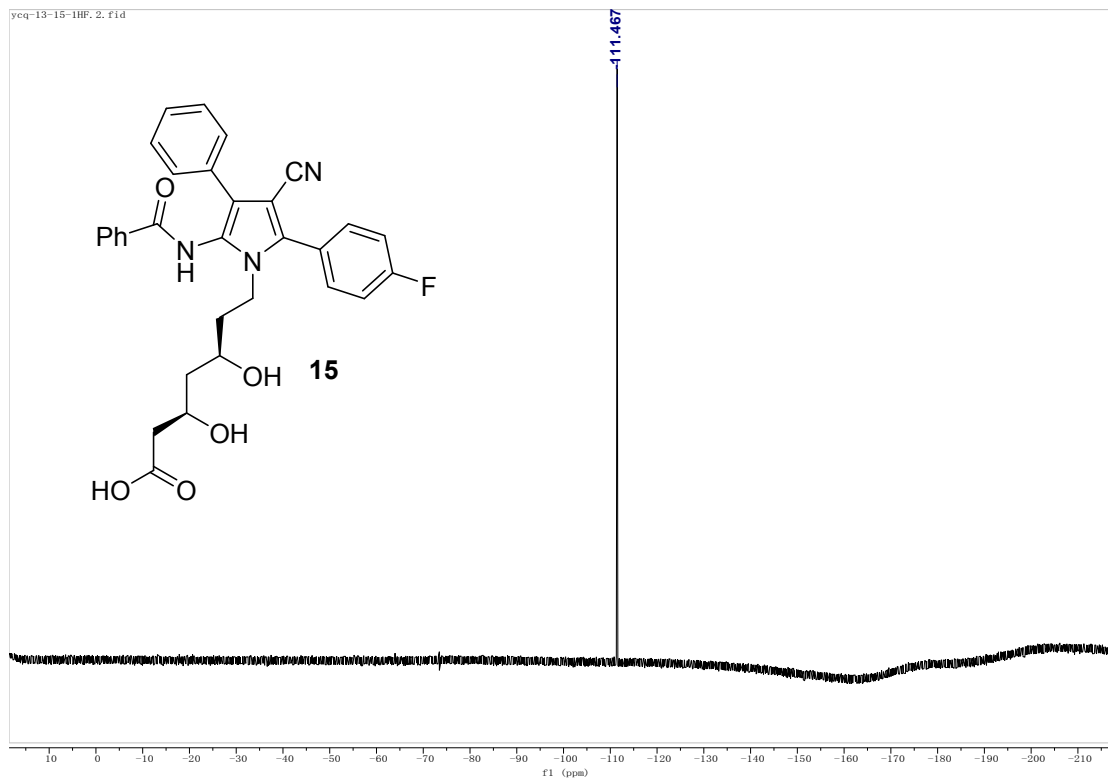

Supplement: d1sc02090k1.pdf [file d1sc02090k1.pdf]
